# Supplementary material for: Differential Burden of Rare and Common Variants on Tumor Characteristics, Survival, and Mode of Detection in Breast Cancer
Source: Oxford University Press journal article supplement (doi:10.1158/0008-5472.can-18-1018), 2018-11-01
Supplement: 00085472can181018-sup-199646_2_supp_5019116_pjtl7d.xlsx [file 00085472can181018-sup-199646_2_supp_5019116_pjtl7d.xlsx]

## Sheet: Table S1
Table S1. Primer sequences and amplicon details. Partially overlapping amplicons were tiled across the target regions with a maximum amplicon length (forward and reverse primer length plus intervening unique sequence) of 200-bp. Primers were designed with melting temperature range 59.0-61.0 ̊C. Each primer included an orientation-specific tail sequence for subsequent ligation of adapter and barco…
Gene/Chr	Assay_Name	Chromosome	Start	End	Forward primer	Reverse primer	Total amplicon length	GC %	Amplicon	Flag
AKT1	AKT1_1	chr14	105236628	105236785	ACACTGACGACATGGTTCTACAGCCGCCTCTCCATCCCTC	TACGGTAGCAGAGACTTGGTCTCCGGGGTCTGAGCTGTCTA	158	66	GCCGCCTCTCCATCCCTCCAAGCTATCGTCCAGCGCAGTCCACCGCCGCCTCAGGCCGTGCCGCTGGCCGAGTAGGAGAACTGGGGGAAGTGGGGCCTGCGCTCGCTGTCCACACACTCCATGCTGTCATCTGTGGGTGTAGACAGCTCAGACCCCGG
AKT1	AKT1_2	chr14	105237031	105237216	ACACTGACGACATGGTTCTACACTGAGTGTGGAGAGAAAAGGG	TACGGTAGCAGAGACTTGGTCTCTCATGACTGTCCCGTCTGC	186	60	CTGAGTGTGGAGAGAAAAGGGAGTGGGCGGGGGCAGGCAGTGGCCCCTCACCTTGGTCAGGTGGTGTGATGGTGATCATCTGGGCCGTGAACTCCTCATCAAAATACCTGGTGTCAGTCTCCGACGTGACCTGGGGCTTGAAGGGTGGGCTGAGCTGCAGAGGTGGGCAGACGGGACAGTCATGAG
AKT1	AKT1_3	chr14	105238639	105238818	ACACTGACGACATGGTTCTACACATGCGTGAGTGTGGATATGTGG	TACGGTAGCAGAGACTTGGTCTGACACTGTGGCCTTGTTTCCT	180	61	catgcgtgagtgtggatatgtggggagcatgcgtgcgcgtgaatatgcggggagcaGCCGCACCTTCTTCTCGTACACGTGCTGCCACACGATACCGGCAAAGAAGCGATGCTGCATGATCTCCTTGGCGTCCTCGGAGCCCCCGCCAAGCCTGCAGGCAGGAAACAAGGCCACAGTGTC	One primer sits in the repeat region
AKT1	AKT1_4	chr14	105239160	105239344	ACACTGACGACATGGTTCTACAGCCTGGGGATGAGGGGAT	TACGGTAGCAGAGACTTGGTCTCCTTCTACAACCAGGACCATGAG	185	60	GCCTGGGGATGAGGGGATGGAGGTGTAGCCTGTAGCTGGGATGGGCGGCCCTCACCTCTGCTTGGGGTCCTTCTTGAGCAGCCCTGAAAGCAAGGACTTGGCCTCGGGACCAAGCGTGCGCGGGAAGCGGATCTCCTCCATGAGGATGAGCTCAAAAAGCTTCTCATGGTCCTGGTTGTAGAAGG
AKT1	AKT1_5	chr14	105239232	105239430	ACACTGACGACATGGTTCTACACTTGAGCAGCCCTGAAAGCAAG	TACGGTAGCAGAGACTTGGTCTGGTGCTGGAGGACAATGACTAC	199	60	CTTGAGCAGCCCTGAAAGCAAGGACTTGGCCTCGGGACCAAGCGTGCGCGGGAAGCGGATCTCCTCCATGAGGATGAGCTCAAAAAGCTTCTCATGGTCCTGGTTGTAGAAGGGCAGGCGACCGCACATCATCTCGTACATGACCACGCCCAGCCCCCACCAGTCCACTGCACGGCCGTAGTCATTGTCCTCCAGCACC
AKT1	AKT1_6	chr14	105239308	105239506	ACACTGACGACATGGTTCTACAAGCTCAAAAAGCTTCTCATGGTC	TACGGTAGCAGAGACTTGGTCTCAAGCACGTCACACCTCCC	199	62	AGCTCAAAAAGCTTCTCATGGTCCTGGTTGTAGAAGGGCAGGCGACCGCACATCATCTCGTACATGACCACGCCCAGCCCCCACCAGTCCACTGCACGGCCGTAGTCATTGTCCTCCAGCACCTGCACGGGTGGCAGATGGGCAGGACTCGGCATCAAGGGGTGTCCGGGACACTGCCGGGGGAGGTGTGACGTGCTTG
AKT1	AKT1_7	chr14	105239560	105239742	ACACTGACGACATGGTTCTACACGCGTATGCACGCAGGT	TACGGTAGCAGAGACTTGGTCTCTGACCTGAGGCCACCTTTC	183	61	CGCGTATGCACGCAGGTGGGGCGCACACCTCGGGGGCCAGGTACTCAGGTGTGCCGCAAAAGGTCTTCATGGTGGCACCGTCCTTGATCCCCTCCTTGCACAGCCCGAAGTCTGTGATCTTAATGTGCCCGTCCTTGTCCAGCATGAGGTTCTCCAGCTAGGGGAAAGGTGGCCTCAGGTCAG
AKT1	AKT1_8	chr14	105239676	105239874	ACACTGACGACATGGTTCTACAATCTTAATGTGCCCGTCCTTGTC	TACGGTAGCAGAGACTTGGTCTGGGCCCGCTTCTATGGC	199	64	ATCTTAATGTGCCCGTCCTTGTCCAGCATGAGGTTCTCCAGCTAGGGGAAAGGTGGCCTCAGGTCAGTGCCGCCAGGCCCCCAGGGCCCTGCCCCCCTGCCTGCCCGCCAGCGCACCTTGAGGTCCCGGTACACCACGTTCTTCTCCGAGTGCAGGTAGTCCAGGGCTGACACAATCTCAGCGCCATAGAAGCGGGCCC
AKT1	AKT1_9	chr14	105239805	105239999	ACACTGACGACATGGTTCTACATACACCACGTTCTTCTCCGAGTG	TACGGTAGCAGAGACTTGGTCTCCGGTCTGAGAAACCCCAG	195	65	TACACCACGTTCTTCTCCGAGTGCAGGTAGTCCAGGGCTGACACAATCTCAGCGCCATAGAAGCGGGCCCGGTCCTCGGAGAACACACGCTCCCGGGACAGGTGGAAGAACAGCTGCGGGAGGCGCAACCTGAGGCACAGCCGTGGCTCGGGCCTCTGCCCCCATGGCCTGCAGGGCTGGGGTTTCTCAGACCGG
AKT1	AKT1_10	chr14	105240147	105240342	ACACTGACGACATGGTTCTACACGTCTGGTGCCATGGAGAG	TACGGTAGCAGAGACTTGGTCTCAGTTCCAGCTCCCCTTCCT	196	67	CGTCTGGTGCCATGGAGAGTAGCCGAGGCTCCGGGAAGGACCGGCCCCACCATGGGCGGCCCACAGGCCGCGAAGTCCATCCCCCGCAGCCCCAGCCCCTACCTCGCCCCCGTTGGCGTACTCCATGACAAAGCAGAGGCGGTCGTGGGTCTGGAAAGAGTACTTCAGGGCCTGCAAGGAAGGGGAGCTGGAACTG
AKT1	AKT1_11	chr14	105241190	105241370	ACACTGACGACATGGTTCTACAGAAGACAGGACATCGTCCCCTA	TACGGTAGCAGAGACTTGGTCTGGTGGCAGCTCACCCAG	181	64	GAAGACAGGACATCGTCCCCTAGAGACAGCCCCAGGAGTCGCTACCTGGCCCCAGCCCTTCAGCCCCATCTGGGCTCCCACTCACTGTGAGGAAGGGGTGCCTGGAGTTCTGCAGGACGCGGTTCTCGGTGAGTGTGTGGGCCACCTCGTCCTGTAAAGCAGGGCTGGGTGAGCTGCCACC
AKT1	AKT1_12	chr14	105241343	105241540	ACACTGACGACATGGTTCTACAGTAAAGCAGGGCTGGGTGA	TACGGTAGCAGAGACTTGGTCTTGAACGAGTTTGAGTACCTGAAG	198	61	GTAAAGCAGGGCTGGGTGAGCTGCCACCCCGCACCCTCATCTCCACCCTGCCCCACCGCCCCGGCCCCACCTTGGCCACGATGACTTCCTTCTTGAGGATCTTCATGGCGTAGTAGCGGCCTGTGGCCTTCTCCTTCACCAGGATCACCTTGCCGAAAGTGCCCTTGCCCAGCAGCTTCAGGTACTCAAACTCGTTCA
AKT1	AKT1_13	chr14	105241481	105241679	ACACTGACGACATGGTTCTACACCAGGATCACCTTGCCGAA	TACGGTAGCAGAGACTTGGTCTTAGGCCACCAGGTGTGAAGT	199	63	CCAGGATCACCTTGCCGAAAGTGCCCTTGCCCAGCAGCTTCAGGTACTCAAACTCGTTCATGGTCTATGGGCAGGCACCAGGGTCAGCAAGCGGCGCTGCCAACAGTGCCCAGCTGGTCGGCATGCGTGGGGTGGCATGAGGGGCCCCAGAGTCGGAGGCAGAGCCAGGAGAGGCGTCCACTTCACACCTGGTGGCCTA
AKT1	AKT1_14	chr14	105241931	105242104	ACACTGACGACATGGTTCTACACAGCCCTCCACAGTCCAAG	TACGGTAGCAGAGACTTGGTCTCTGACGGCCTCAAGAAGCA	174	64	CAGCCCTCCACAGTCCAAGGCAGCCCCAGGCACAGGCAGAAGTGGGGACAGGCCTCACCACGCGGTGCTTGGGCTTGGCCAGGGACACCTCCATCTCTTCAGCCCCTGAGTTGTCACTGGGTGAGCCCGACCGGAAGTCCATCTCCTCCTCCTCCTGCTTCTTGAGGCCGTCAG
AKT1	AKT1_15	chr14	105242004	105242201	ACACTGACGACATGGTTCTACACTTGGCCAGGGACACCTC	TACGGTAGCAGAGACTTGGTCTGTGAAAGACGTGGGGTGGA	198	62	CTTGGCCAGGGACACCTCCATCTCTTCAGCCCCTGAGTTGTCACTGGGTGAGCCCGACCGGAAGTCCATCTCCTCCTCCTCCTGCTTCTTGAGGCCGTCAGCCACAGTCTGGATGGCGGTTGTCCACTCCTCCCTGCAGGAGGTCAGGTGAGGCTGCAGGCCTGTACCAGATCAGGAGCTCCACCCCACGTCTTTCAC
AKT1	AKT1_16	chr14	105242928	105243120	ACACTGACGACATGGTTCTACACATCCCCGTGTCCCTCCT	TACGGTAGCAGAGACTTGGTCTTGCCTGCCCGCAGAGT	193	66	CATCCCCGTGTCCCTCCTAAGCGCTGGGGCTGCCCAAGTGCCTGGCCTGGCCGCCACAGCCCACGTACCGCTCCTCAGGAGTCTCCACATGGAAGGTGCGTTCGATGACAGTGGTCCACTGCAGGCAGCGGATGATGAAGGTGTTGGGCCGGGGCCGCTCCGTCTTCATCAGCTGGCACTCTGCGGGCAGGCA
AKT1	AKT1_17	chr14	105243016	105243207	ACACTGACGACATGGTTCTACAATGGAAGGTGCGTTCGATGAC	TACGGTAGCAGAGACTTGGTCTGTGGTATGCAAGGGGAGCTG	192	66	ATGGAAGGTGCGTTCGATGACAGTGGTCCACTGCAGGCAGCGGATGATGAAGGTGTTGGGCCGGGGCCGCTCCGTCTTCATCAGCTGGCACTCTGCGGGCAGGCAGAGCCTCTGTCTGCGTGCATCCCCCTGCCCCTCCCAGGGCCCTCACCACAGCCCCCGCTGCACCAGCCAGCTCCCCTTGCATACCAC
AKT1	AKT1_18	chr14	105246332	105246529	ACACTGACGACATGGTTCTACACTCCAGGGGACCCCCATC	TACGGTAGCAGAGACTTGGTCTCACGCTACTTCCTCCTCAAGAAT	198	60	CTCCAGGGGACCCCCATCGTGGGGCCTGGTGGGCAAAGAGGGCTCCAGCCAACCCCCCAAATCTGAATCCCGAGAGGCCAAGGGGATACTTACGCGCCACAGAGAAGTTGTTGAGGGGAGCCTCACGTTGGTCCACATCCTGCGGCCGCTCCTTGTAGCCAATGAAGGTGCCATCATTCTTGAGGAGGAAGTAGCGTG
AKT1	AKT1_19	chr14	105246429	105246606	ACACTGACGACATGGTTCTACACACAGAGAAGTTGTTGAGGGGAG	TACGGTAGCAGAGACTTGGTCTCGAGGGTCTGACGGGTAGAG	178	59	CACAGAGAAGTTGTTGAGGGGAGCCTCACGTTGGTCCACATCCTGCGGCCGCTCCTTGTAGCCAATGAAGGTGCCATCATTCTTGAGGAGGAAGTAGCGTGGCCGCCAGGTCTTGATGTACTCCCCTACAGACGTGCGGGTGGTGAGAGCCACGCACACTCTACCCGTCAGACCCTCG
AKT1	AKT1_20	chr14	105258839	105259021	ACACTGACGACATGGTTCTACACCCCTCCCACCCAGCAG	TACGGTAGCAGAGACTTGGTCTCCTGAGAGGAGCGCGTGA	183	67	CCCCTCCCACCCAGCAGGGCACAGGCACTCACAGACCCTGGGGCTACTACCCCCATCTCTCCCTCCCCAGGCCCAGCCCTGGCAGCGGGTACTAACCTCGTTTGTGCAGCCAACCCTCCTTCACAATAGCCACGTCGCTCATGGTGCCCGAGGCTCCCGCGACGCTCACGCGCTCCTCTCAGG
ATM	ATM_1	chr11	108098316	108098513	ACACTGACGACATGGTTCTACATTACAGACAGTGATGTGTGTTCT	TACGGTAGCAGAGACTTGGTCTTCAACTTCTTTCTGAAAATAAAAAGGAAATAA	198	32	TTACAGACAGTGATGTGTGTTCTGAAATTGTGAACCATGAGTCTAGTACTTAATGATCTGCTTATCTGCTGCCGTCAACTAGAACATGATAGAGCTACAGAACGAAAGGTAGTAAATTACTTAAATTCAATTTTTCCTTGAAATAAGTGTGATTAGTAACCCATTATTATTTCCTTTTTATTTTCAGAAAGAAGTTGA
ATM	ATM_2	chr11	108098462	108098632	ACACTGACGACATGGTTCTACAGTGTGATTAGTAACCCATTATTATTTCCTT	TACGGTAGCAGAGACTTGGTCTAAATTTGAATAGAATACCTAAAAACAGCATCC	171	31	GTGTGATTAGTAACCCATTATTATTTCCTTTTTATTTTCAGAAAGAAGTTGAGAAATTTAAGCGCCTGATTCGAGATCCTGAAACAATTAAACATCTAGATCGGCATTCAGATTCCAAACAAGGAAAATATTTGAATTGGGATGCTGTTTTTAGGTATTCTATTCAAATTT
ATM	ATM_3	chr11	108098508	108098694	ACACTGACGACATGGTTCTACAAGTTGAGAAATTTAAGCGCCTGAT	TACGGTAGCAGAGACTTGGTCTACACACAAAAGTAATATCACAACAGAA	187	29	AGTTGAGAAATTTAAGCGCCTGATTCGAGATCCTGAAACAATTAAACATCTAGATCGGCATTCAGATTCCAAACAAGGAAAATATTTGAATTGGGATGCTGTTTTTAGGTATTCTATTCAAATTTATTTTACTGTCTTTATTTTTCTCTTTCATATTTATTTCTGTTGTGATATTACTTTTGTGTGT
ATM	ATM_4	chr11	108099820	108100000	ACACTGACGACATGGTTCTACACTTTGTGATGGCATGAACAGCTT	TACGGTAGCAGAGACTTGGTCTATCTTTTTCTGCCTGGAGGCTTG	181	31	CTTTGTGATGGCATGAACAGCTTTTGAAATTATTATAATTTAAGTATTCAACGAGTTTCTGAAATTGCATTTTGTTTTCTTGAAGATTTTTACAGAAATATATTCAGAAAGAAACAGAATGTCTGAGAATAGCAAAACCAAATGTATCAGCCTCAACACAAGCCTCCAGGCAGAAAAAGAT
ATM	ATM_5	chr11	108099927	108100103	ACACTGACGACATGGTTCTACAAAAGAAACAGAATGTCTGAGAATAGC	TACGGTAGCAGAGACTTGGTCTCACGCGACAGTAATCTGTTAAGC	177	36	AAAGAAACAGAATGTCTGAGAATAGCAAAACCAAATGTATCAGCCTCAACACAAGCCTCCAGGCAGAAAAAGATGCAGGAAATCAGTAGTTTGGTCAAATACTTCATCAAATGTGCAAACAGAAGTAAGTGATGTTATAAATTATAAATAAATGGCTTAACAGATTACTGTCGCGTG
ATM	ATM_6	chr11	108106328	108106504	ACACTGACGACATGGTTCTACAAGTTGCCATTCCAAGTGTCTTAT	TACGGTAGCAGAGACTTGGTCTTGAGTAGTATGTTGCTACAATCAGC	177	31	AGTTGCCATTCCAAGTGTCTTATTTTTGTTCAAATTTATGTTTTTCTTTATTTGTTTATTTTGAAATAGGAGCACCTAGGCTAAAATGTCAAGAACTCTTAAATTATATCATGGATACAGTGAAAGATTCATCTAATGGTGCTATTTACGGAGCTGATTGTAGCAACATACTACTCA
ATM	ATM_7	chr11	108106395	108106590	ACACTGACGACATGGTTCTACAAGGAGCACCTAGGCTAAAATGTC	TACGGTAGCAGAGACTTGGTCTATTCACAAACAACAACCTTCAAAAC	196	36	AGGAGCACCTAGGCTAAAATGTCAAGAACTCTTAAATTATATCATGGATACAGTGAAAGATTCATCTAATGGTGCTATTTACGGAGCTGATTGTAGCAACATACTACTCAAAGACATTCTTTCTGTGAGAAAATACTGGTGTGAAATATCTCAGCAACAGTGGTTAGGTATGTTTTGAAGGTTGTTGTTTGTGAAT
ATM	ATM_8	chr11	108114576	108114764	ACACTGACGACATGGTTCTACATCCTTTTTCTGTATGGGATTATGGA	TACGGTAGCAGAGACTTGGTCTACAGCATGAATTATTCTAGCCACT	189	26	TCCTTTTTCTGTATGGGATTATGGAATATTTAAGTTAAATTGTAACATTTAATACATTTTGATTTTTAAAAAATCATGACtaataatttttttttttttttaaGAATTGTTCTCTGTGTACTTCAGGCTCTATCTGAAACCTTCACAAGATGTTCATAGAGTTTTAGTGGCTAGAATAATTCATGCTGT
ATM	ATM_9	chr11	108114683	108114870	ACACTGACGACATGGTTCTACATGTTCTCTGTGTACTTCAGGCTC	TACGGTAGCAGAGACTTGGTCTACAAAAGAAAAAGAGATTAGATTACCTCG	188	37	TGTTCTCTGTGTACTTCAGGCTCTATCTGAAACCTTCACAAGATGTTCATAGAGTTTTAGTGGCTAGAATAATTCATGCTGTTACCAAAGGATGCTGTTCTCAGACTGACGGATTAAATTCCAAATTTTTGGACTTTTTTTCCAAGGCTATTCAGTGTGCGAGGTAATCTAATCTCTTTTTCTTTTGT
ATM	ATM_10	chr11	108114741	108114919	ACACTGACGACATGGTTCTACAAGTGGCTAGAATAATTCATGCTGT	TACGGTAGCAGAGACTTGGTCTACTGAGTCTAAAACATGGTCTTGC	179	35	AGTGGCTAGAATAATTCATGCTGTTACCAAAGGATGCTGTTCTCAGACTGACGGATTAAATTCCAAATTTTTGGACTTTTTTTCCAAGGCTATTCAGTGTGCGAGGTAATCTAATCTCTTTTTCTTTTGTTTTGTATTGAAATACTTTTGATCTTGCAAGACCATGTTTTAGACTCAGT
ATM	ATM_11	chr11	108115460	108115633	ACACTGACGACATGGTTCTACATTGTACAGTTTGTTCCCCCTGTT	TACGGTAGCAGAGACTTGGTCTTGGGAAGAATTTCATCTCCTAATTCACA	174	40	TTGTACAGTTTGTTCCCCCTGTTATACCCAGTTGAGCTTGTTTGTTTCTTCACAGACAAGAAAAGAGCTCTTCAGGTCTAAATCATATCTTAGCAGCTCTTACTATCTTCCTCAAGACTTTGGCTGTCAACTTTCGAATTCGAGTGTGTGAATTAGGAGATGAAATTCTTCCCA
ATM	ATM_12	chr11	108115552	108115750	ACACTGACGACATGGTTCTACAGCAGCTCTTACTATCTTCCTCAA	TACGGTAGCAGAGACTTGGTCTTTTCTTGGGTTTTGGCTCCTTTC	199	35	GCAGCTCTTACTATCTTCCTCAAGACTTTGGCTGTCAACTTTCGAATTCGAGTGTGTGAATTAGGAGATGAAATTCTTCCCACTTTGCTTTATATTTGGACTCAACATAGGCTTAATGATTCTTTAAAAGAAGTCATTATTGAATTATTTCAACTGCAAATTTATATCCATCATCCGAAAGGAGCCAAAACCCAAGAAA
ATM	ATM_13	chr11	108115614	108115808	ACACTGACGACATGGTTCTACAAGGAGATGAAATTCTTCCCACTTT	TACGGTAGCAGAGACTTGGTCTACTTCTATGTTTGAATGAAGAAGCAA	195	31	AGGAGATGAAATTCTTCCCACTTTGCTTTATATTTGGACTCAACATAGGCTTAATGATTCTTTAAAAGAAGTCATTATTGAATTATTTCAACTGCAAATTTATATCCATCATCCGAAAGGAGCCAAAACCCAAGAAAAAGGTATAAAGGAAATGTTTACTGTTTTGAATTTGCTTCTTCATTCAAACATAGAAGT
ATM	ATM_14	chr11	108117623	108117815	ACACTGACGACATGGTTCTACATTTGTGGGAGCTAGCAGTGTAAA	TACGGTAGCAGAGACTTGGTCTTTTGACGGCAATATTACGAAATCC	193	31	TTTGTGGGAGCTAGCAGTGTAAACAGAGTACATACATAAAAATTACATTTTAATTTTTTGGATTACAGGTGCTTATGAATCAACAAAATGGAGAAGTATTTTATACAACTTATATGATCTGCTAGTGAATGAGATAAGTCATATAGGAAGTAGAGGAAAGTATTCTTCAGGATTTCGTAATATTGCCGTCAAA
ATM	ATM_15	chr11	108117736	108117932	ACACTGACGACATGGTTCTACAATGATCTGCTAGTGAATGAGATAAGT	TACGGTAGCAGAGACTTGGTCTTTTAAAAGCCCAAAATGCCCAGT	197	33	ATGATCTGCTAGTGAATGAGATAAGTCATATAGGAAGTAGAGGAAAGTATTCTTCAGGATTTCGTAATATTGCCGTCAAAGAAAATTTGATTGAATTGATGGCAGATATCTGTCACCAGGTACAGTAAGTAGGTCATGTCACATTTAGAAATTTCCTGTTAATTTTTTTTTTAAACTGGGCATTTTGGGCTTTTAAA
ATM	ATM_16	chr11	108119559	108119753	ACACTGACGACATGGTTCTACAGATACGAGATCGTGCTGTTCC	TACGGTAGCAGAGACTTGGTCTTCCTTTTGCAAGGGACACTGTAAT	195	36	gatacgagatcgtgctgttccactccaacctgggcaacaacagcgaaactctggctcaaaaaaaaaaaaaagaaaaaaGTGGATTTATTTTTATTTTACAGGTTTTTAATGAAGATACCAGATCCTTGGAGATTTCTCAATCTTACACTACTACACAAAGAGAATCTAGTGATTACAGTGTCCCTTGCAAAAGGA	One primer sits in the repeat region
ATM	ATM_17	chr11	108119688	108119880	ACACTGACGACATGGTTCTACAAGATTTCTCAATCTTACACTACTACACA	TACGGTAGCAGAGACTTGGTCTAACATACAAGAGATTAAAATGACACTGAA	193	35	AGATTTCTCAATCTTACACTACTACACAAAGAGAATCTAGTGATTACAGTGTCCCTTGCAAAAGGAAGAAAATAGAACTAGGCTGGGAAGTAATAAAAGATCACCTTCAGAAGTCACAGAATGATTTTGATCTTGTGCCTTGGTAAAGTGTTACCATTTTCTCATTCAGTGTCATTTTAATCTCTTGTATGTT
ATM	ATM_18	chr11	108121365	108121538	ACACTGACGACATGGTTCTACATTTCCTTTTAGTTTGTTAATGTGATGGA	TACGGTAGCAGAGACTTGGTCTCCATGTCGCTGTTGGGGTAG	174	34	TTTCCTTTTAGTTTGTTAATGTGATGGAATAGTTTTCAAATTATCCTTTTTTTTTTTTTTTAGGCTACAGATTGCAACCCAATTAATATCAAAGTATCCTGCAAGTTTACCTAACTGTGAGCTGTCTCCATTACTGATGATACTATCTCAGCTTCTACCCCAACAGCGACATGG
ATM	ATM_19	chr11	108121468	108121666	ACACTGACGACATGGTTCTACAAGTTTACCTAACTGTGAGCTGTCT	TACGGTAGCAGAGACTTGGTCTAGGTAATACACCAAATTTTATTCCAGAGT	199	40	AGTTTACCTAACTGTGAGCTGTCTCCATTACTGATGATACTATCTCAGCTTCTACCCCAACAGCGACATGGGGAACGTACACCATATGTGTTACGATGCCTTACGGAAGTTGCATTGTGTCAAGACAAGAGGTCAAACCTAGAAAGCTCACAAAAGTCAGATTTATTAAAACTCTGGAATAAAATTTGGTGTATTACCT
ATM	ATM_20	chr11	108121552	108121722	ACACTGACGACATGGTTCTACATATGTGTTACGATGCCTTACGGA	TACGGTAGCAGAGACTTGGTCTGGCTCCAAGTAAGCCAAAGTTTTC	171	37	TATGTGTTACGATGCCTTACGGAAGTTGCATTGTGTCAAGACAAGAGGTCAAACCTAGAAAGCTCACAAAAGTCAGATTTATTAAAACTCTGGAATAAAATTTGGTGTATTACCTTTCGTGGTATAAGTTCTGAGCAAATACAAGCTGAAAACTTTGGCTTACTTGGAGCC
ATM	ATM_21	chr11	108121652	108121850	ACACTGACGACATGGTTCTACATTTGGTGTATTACCTTTCGTGGT	TACGGTAGCAGAGACTTGGTCTGTGTCTGTGTGTGTTTATCTGTAAGT	199	40	TTTGGTGTATTACCTTTCGTGGTATAAGTTCTGAGCAAATACAAGCTGAAAACTTTGGCTTACTTGGAGCCATAATTCAGGGTAGTTTAGTTGAGGTTGACAGAGAATTCTGGAAGTTATTTACTGGGTCAGCCTGCAGACCTTCATGGTAAGTTCAGCATGCATTATGTCTGACTTacagataaacacacacagacac	One primer sits in the repeat region
ATM	ATM_22	chr11	108122503	108122698	ACACTGACGACATGGTTCTACAAGATAAAGTCTTTGCCCCTCCAA	TACGGTAGCAGAGACTTGGTCTAAGAGCCATTTCATTATTGATTCCTTT	196	37	AGATAAAGTCTTTGCCCCTCCAATAGCTTGCTTTTCACAATTGTCCTTTGTTTTGTTATAGTCCTGCAGTATGCTGTTTGACTTTGGCACTGACCACCAGTATAGTTCCAGGAACGGTAAAAATGGGAATAGAGCAAAATATGTGTGAAGTAAATAGAAGCTTTTCTTTAAAGGAATCAATAATGAAATGGCTCTT
ATM	ATM_23	chr11	108122626	108122820	ACACTGACGACATGGTTCTACATGGGAATAGAGCAAAATATGTGTGAA	TACGGTAGCAGAGACTTGGTCTAGTGGAGAGAGCCTGATAAAACA	195	34	TGGGAATAGAGCAAAATATGTGTGAAGTAAATAGAAGCTTTTCTTTAAAGGAATCAATAATGAAATGGCTCTTATTCTATCAGTTAGAGGGTGACTTAGAAAATAGCACAGAAGTGCCTCCAATTCTTCACAGGTAATTTAAGTTCATTAGCATGCTGCTGTTTTTTTTGTTTGTTTTATCAGGCTCTCTCCACT
ATM	ATM_24	chr11	108123492	108123662	ACACTGACGACATGGTTCTACATCTTTACATGGCTTTTGGTCTTCT	TACGGTAGCAGAGACTTGGTCTAAGAGCATTATTAGATAACATACCATTCTG	171	33	TCTTTACATGGCTTTTGGTCTTCTAAGTGAAGCTTTTTGTTTTTCTTTGTAGTAATTTTCCTCATCTTGTACTGGAGAAAATTCTTGTGAGTCTCACTATGAAAAACTGTAAAGCTGCAATGAATTTTTTCCAAAGCGTGCCAGAATGGTATGTTATCTAATAATGCTCTT
ATM	ATM_25	chr11	108123547	108123725	ACACTGACGACATGGTTCTACATTTTCCTCATCTTGTACTGGAGAAA	TACGGTAGCAGAGACTTGGTCTGATGCAGCTACTACCCAGCTAAA	179	33	TTTTCCTCATCTTGTACTGGAGAAAATTCTTGTGAGTCTCACTATGAAAAACTGTAAAGCTGCAATGAATTTTTTCCAAAGCGTGCCAGAATGGTATGTTATCTAATAATGCTCTTTATCATTTTAAGCTATAGCTTTAATTACAAAGATGATAATTTTAGCTGGGTAGTAGCTGCATC
ATM	ATM_26	chr11	108124488	108124684	ACACTGACGACATGGTTCTACAAGGCAAAGCATTAGGTACTTGGT	TACGGTAGCAGAGACTTGGTCTGAGAAGCCAATACTGGACTGGTG	197	35	AGGCAAAGCATTAGGTACTTGGTTTATATATTAAAGATCTTACTTTCTTGAAGTGAACACCACCAAAAAGATAAAGAAGAACTTTCATTCTCAGAAGTAGAAGAACTATTTCTTCAGACAACTTTTGACAAGATGGACTTTTTAACCATTGTGAGAGAATGTGGTATAGAAAAGCACCAGTCCAGTATTGGCTTCTC
ATM	ATM_27	chr11	108124529	108124727	ACACTGACGACATGGTTCTACAACTTTCTTGAAGTGAACACCACCA	TACGGTAGCAGAGACTTGGTCTCAGAAGACAGCGATCCAGTGATT	199	39	ACTTTCTTGAAGTGAACACCACCAAAAAGATAAAGAAGAACTTTCATTCTCAGAAGTAGAAGAACTATTTCTTCAGACAACTTTTGACAAGATGGACTTTTTAACCATTGTGAGAGAATGTGGTATAGAAAAGCACCAGTCCAGTATTGGCTTCTCTGTCCACCAGAATCTCAAGGAATCACTGGATCGCTGTCTTCTG
ATM	ATM_28	chr11	108124643	108124832	ACACTGACGACATGGTTCTACAAGAATGTGGTATAGAAAAGCACCA	TACGGTAGCAGAGACTTGGTCTTCCTTCCTAACAGTTTACCAAAGTTGA	190	37	AGAATGTGGTATAGAAAAGCACCAGTCCAGTATTGGCTTCTCTGTCCACCAGAATCTCAAGGAATCACTGGATCGCTGTCTTCTGGGATTATCAGAACAGCTTCTGAATAATTACTCATCTGAGGTGAGATTTTTTAAAAAAAGAACTAAGCTTATATATGATTCAACTTTGGTAAACTGTTAGGAAGGA
ATM	ATM_29	chr11	108126837	108127034	ACACTGACGACATGGTTCTACAGAACTTTTGTTTTTTAATATGTATGTAGAATTTGTT	TACGGTAGCAGAGACTTGGTCTTTCCTCTTCAGCTATTACACCCA	198	30	GAACTTTTGTTTTTTAATATGTATGTAGAATTTGTTCTTACAAAAGATAGAGTATACtaaattatttatgaaatatatatatttttatttGTGGTTTACTTTAAGATTACAAATTCAGAAACTCTTGTCCGGTGTTCACGTCTTTTGGTGGGTGTCCTTGGCTGCTACTGTTACATGGGTGTAATAGCTGAAGAGGAA
ATM	ATM_30	chr11	108126940	108127114	ACACTGACGACATGGTTCTACAAGATTACAAATTCAGAAACTCTTGTCC	TACGGTAGCAGAGACTTGGTCTATTTCATTCAAATTTATCCGAAACTTTATTAGT	175	37	AGATTACAAATTCAGAAACTCTTGTCCGGTGTTCACGTCTTTTGGTGGGTGTCCTTGGCTGCTACTGTTACATGGGTGTAATAGCTGAAGAGGAAGCATATAAGTCAGAATTATTCCAGAAAGCCAAGGTAGGAGAATTTATACTAATAAAGTTTCGGATAAATTTGAATGAAAT
ATM	ATM_31	chr11	108128126	108128315	ACACTGACGACATGGTTCTACACCAAGATCAAAGTACACTGTAAAAAGCA	TACGGTAGCAGAGACTTGGTCTGCAACGTGTACATAGCTGCATCA	190	33	CCAAGATCAAAGTACACTGTAAAAAGCAATACTAAACTATAATTTTAACTGGAATTTGCATTTTTCCTTCTATTCACAATAGTCTCTAATGCAATGTGCAGGAGAAAGTATCACTCTGTTTAAAAATAAGACAAATGAGGAATTCAGAATTGGTTCCTTGAGAAATATGATGCAGCTATGTACACGTTGC
ATM	ATM_32	chr11	108128198	108128373	ACACTGACGACATGGTTCTACATTCACAATAGTCTCTAATGCAATGTG	TACGGTAGCAGAGACTTGGTCTTCCTATCTCAAAAAACAAAACAAGAAGA	176	35	TTCACAATAGTCTCTAATGCAATGTGCAGGAGAAAGTATCACTCTGTTTAAAAATAAGACAAATGAGGAATTCAGAATTGGTTCCTTGAGAAATATGATGCAGCTATGTACACGTTGCTTGAGCAACTGTACCAAGGTAAGAttttcttcttcttgttttgttttttgagatagga	One primer sits in the repeat region
ATM	ATM_33	chr11	108129666	108129837	ACACTGACGACATGGTTCTACATGTTTTTATTTCTTTGTTGCTTGGTTCT	TACGGTAGCAGAGACTTGGTCTtcaaaatatgATAGCAAAACAGGAAGC	172	31	TGTTTTTATTTCTTTGTTGCTTGGTTCTTTGTTTGTCTTAATTGCAGAAGAGTCCAAATAAGATTGCATCTGGCTTTTTCCTGCGATTGTTAACATCAAAGCTAATGAATGACATTGCAGATATTTGTAAAAGTTTAGTAAGTATGCTTCCTGTTTTGCTATcatattttga	One primer sits in the repeat region
ATM	ATM_34	chr11	108137849	108138043	ACACTGACGACATGGTTCTACATGCTCCTGCAAGAAGCCAT	TACGGTAGCAGAGACTTGGTCTTCGTTTGCATCACTAACACTACTATCA	195	40	TGCTCCTGCAAGAAGCCATCTTGAACATCTTTGTTTCTCTTCCTTGAAGGCATCCTTCATCAAAAAGCCATTTGACCGTGGAGAAGTAGAATCAATGGAAGATGATACTAATGGAAATCTAATGGAGGTGGAGGATCAGTCATCCATGAATCTATTTAACGATTACCCTGATAGTAGTGTTAGTGATGCAAACGA
ATM	ATM_35	chr11	108137915	108138110	ACACTGACGACATGGTTCTACAGCCATTTGACCGTGGAGAAGTA	TACGGTAGCAGAGACTTGGTCTAAAGAAGTAAAAGAAATCCCAAGTAGTAAA	196	38	GCCATTTGACCGTGGAGAAGTAGAATCAATGGAAGATGATACTAATGGAAATCTAATGGAGGTGGAGGATCAGTCATCCATGAATCTATTTAACGATTACCCTGATAGTAGTGTTAGTGATGCAAACGAACCTGGAGAGAGCCAAAGTACCATAGGTAAATACATATTTACTACTTGGGATTTCTTTTACTTCTTT
ATM	ATM_36	chr11	108139084	108139260	ACACTGACGACATGGTTCTACATATATGGCTGTTGTGCCCTTCTC	TACGGTAGCAGAGACTTGGTCTGCTGCCCTAAAGGACACAGTATT	177	38	TATATGGCTGTTGTGCCCTTCTCTTAGTGTTAATGAGTGCTTTTTATTTTTAGGTGCCATTAATCCTTTAGCTGAAGAATATCTGTCAAAGCAAGATCTACTTTTCTTAGACATGCTCAAGTTCTTGTGTTTGTGTGTAACTACTGCTCAGACCAATACTGTGTCCTTTAGGGCAGC
ATM	ATM_37	chr11	108139135	108139327	ACACTGACGACATGGTTCTACAAGGTGCCATTAATCCTTTAGCTG	TACGGTAGCAGAGACTTGGTCTGTGGAGGGATTTGGTAGGTTCT	193	40	AGGTGCCATTAATCCTTTAGCTGAAGAATATCTGTCAAAGCAAGATCTACTTTTCTTAGACATGCTCAAGTTCTTGTGTTTGTGTGTAACTACTGCTCAGACCAATACTGTGTCCTTTAGGGCAGCTGATATTCGGAGGAAATTGTTAATGTTAATTGATTCTAGCACGCTAGAACCTACCAAATCCCTCCAC
ATM	ATM_38	chr11	108139255	108139439	ACACTGACGACATGGTTCTACAGGCAGCTGATATTCGGAGGAAAT	TACGGTAGCAGAGACTTGGTCTTCAATTCTTCAAAGACACCATGTGA	185	38	GGCAGCTGATATTCGGAGGAAATTGTTAATGTTAATTGATTCTAGCACGCTAGAACCTACCAAATCCCTCCACCTGCATATGGTGAGTTACGTTAAATGAAGAAGCTCTTGGATTTTATCTGATGTTGCTGACTAAATGTAATGAGTTGACATGTAAGAATCACATGGTGTCTTTGAAGAATTGA
ATM	ATM_39	chr11	108141739	108141891	ACACTGACGACATGGTTCTACAAAAGTAAATGATTTGTGGATAAACCTGA	TACGGTAGCAGAGACTTGGTCTAAGGTTTTAATTTCTTACGATAGTGGTT	153	36	AAAGTAAATGATTTGTGGATAAACCTGATTTTTTTCCCTCCTACCATCTTAGTATCTAATGCTTTTAAAGGAGCTTCCTGGAGAAGAGTACCCCTTGCCAATGGAAGATGTTCTTGAACTTCTGAAACCACTATCGTAAGAAATTAAAACCTT
ATM	ATM_40	chr11	108141813	108142007	ACACTGACGACATGGTTCTACATTCCTGGAGAAGAGTACCCCTTG	TACGGTAGCAGAGACTTGGTCTTGGTCACGACGATACAAAGAACA	195	33	TTCCTGGAGAAGAGTACCCCTTGCCAATGGAAGATGTTCTTGAACTTCTGAAACCACTATCGTAAGAAATTAAAACCTTATGTTATGTTCACTTTAAAGTTATAAAATAACTGATGTGTTCTGTTAAGCTTATAAAGTTGAACTTTTTTTTTTTTTTTACCACAGCAATGTGTGTTCTTTGTATCGTCGTGACCA
ATM	ATM_41	chr11	108141856	108142052	ACACTGACGACATGGTTCTACAACTTCTGAAACCACTATCGTAAGAA	TACGGTAGCAGAGACTTGGTCTTTCACTACATGAAGGACATGGTT	197	29	ACTTCTGAAACCACTATCGTAAGAAATTAAAACCTTATGTTATGTTCACTTTAAAGTTATAAAATAACTGATGTGTTCTGTTAAGCTTATAAAGTTGAACTTTTTTTTTTTTTTTACCACAGCAATGTGTGTTCTTTGTATCGTCGTGACCAAGATGTTTGTAAAACTATTTTAAACCATGTCCTTCATGTAGTGAA
ATM	ATM_42	chr11	108141994	108142192	ACACTGACGACATGGTTCTACATATCGTCGTGACCAAGATGTTT	TACGGTAGCAGAGACTTGGTCTTGCATTCGTATCCACAGATAGCA	199	38	TATCGTCGTGACCAAGATGTTTGTAAAACTATTTTAAACCATGTCCTTCATGTAGTGAAAAACCTAGGTCAAAGCAATATGGACTCTGAGAACACAAGGGATGCTCAAGGACAGTTTCTTACAGTAATTGGAGCATTTTGGTAGGTACAGTCTATTTTGTGGTCCTATTTTTCTTTTGCTATCTGTGGATACGAATGCA
ATM	ATM_43	chr11	108143152	108143347	ACACTGACGACATGGTTCTACAAGCACAGAAAGACATATTGGAAGT	TACGGTAGCAGAGACTTGGTCTTGCAAAAACTCACCTCAAGCAAA	196	33	AGCACAGAAAGACATATTGGAAGTAACTTACAATAACCTTTCAGTGAGTTTTCTGAGTGCTTTTATCAGAATGATTATTTAACTTTGGAAAACTTACTTGATTTCAGGCATCTAACAAAGGAGAGGAAATATATATTCTCTGTAAGAATGGCCCTAGTAAATTGCCTTAAAACTTTGCTTGAGGTGAGTTTTTGCA
ATM	ATM_44	chr11	108143256	108143454	ACACTGACGACATGGTTCTACACAGGCATCTAACAAAGGAGAGGA	TACGGTAGCAGAGACTTGGTCTATCAGCCTACGGGAAAAGAACTG	199	32	CAGGCATCTAACAAAGGAGAGGAAATATATATTCTCTGTAAGAATGGCCCTAGTAAATTGCCTTAAAACTTTGCTTGAGGTGAGTTTTTGCATTTTTTTAGTAAGATCTCCATTGAAAATTTTAAAGCAGTCTTTGTTTGTTAATGAGTAATTTTTCTCTATTTCATATTTAACCACAGTTCTTTTCCCGTAGGCTGAT
ATM	ATM_45	chr11	108143380	108143553	ACACTGACGACATGGTTCTACAAAGCAGTCTTTGTTTGTTAATGAGT	TACGGTAGCAGAGACTTGGTCTGCGAACTTGGTGATGATTGTCAG	174	34	AAGCAGTCTTTGTTTGTTAATGAGTAATTTTTCTCTATTTCATATTTAACCACAGTTCTTTTCCCGTAGGCTGATCCTTATTCAAAATGGGCCATTCTTAATGTAATGGGAAAAGACTTTCCTGTAAATGAAGTATTTACACAATTTCTTGCTGACAATCATCACCAAGTTCGC
ATM	ATM_46	chr11	108143428	108143626	ACACTGACGACATGGTTCTACAACCACAGTTCTTTTCCCGTAGG	TACGGTAGCAGAGACTTGGTCTTGCCATCTGCAGCATTCCAAATA	199	39	ACCACAGTTCTTTTCCCGTAGGCTGATCCTTATTCAAAATGGGCCATTCTTAATGTAATGGGAAAAGACTTTCCTGTAAATGAAGTATTTACACAATTTCTTGCTGACAATCATCACCAAGTTCGCATGTTGGCTGCAGAGTCAATCAATAGGTAATGGGTCAAATATTCATGAAGTATTTGGAATGCTGCAGATGGCA
ATM	ATM_47	chr11	108150143	108150331	ACACTGACGACATGGTTCTACAATGCTTTGGAAAGTAGGGTTTGA	TACGGTAGCAGAGACTTGGTCTTCTCTCATTCCTTCCTGAGCTTT	189	37	ATGCTTTGGAAAGTAGGGTTTGAAATTAGAAAATTATTTCACTTtttgtttgtttgtttgcttgcttgtttTAAGATTGTTCCAGGACACGAAGGGAGATTCTTCCAGGTTACTGAAAGCACTTCCTTTGAAGCTTCAGCAAACAGCTTTTGAAAATGCATACTTGAAAGCTCAGGAAGGAATGAGAGA
ATM	ATM_48	chr11	108150215	108150412	ACACTGACGACATGGTTCTACAAAGATTGTTCCAGGACACGAAGG	TACGGTAGCAGAGACTTGGTCTCCAAACTTGGTGAAGTAATTTATGGGA	198	37	AAGATTGTTCCAGGACACGAAGGGAGATTCTTCCAGGTTACTGAAAGCACTTCCTTTGAAGCTTCAGCAAACAGCTTTTGAAAATGCATACTTGAAAGCTCAGGAAGGAATGAGAGAAATGGTAATTTTAAGTAACATGTATTTGCTGTTATCATATGCTTGCTATGAATATCCCATAAATTACTTCACCAAGTTTGG
ATM	ATM_49	chr11	108151619	108151817	ACACTGACGACATGGTTCTACATGTGTATAGCTTGTCAAAAAATCTGG	TACGGTAGCAGAGACTTGGTCTAGGGCTACAGGATAAAACCACAG	199	30	TGTGTATAGCTTGTCAAAAAATCTGGAGTTCAGTTGGGATTTTATAATTGATTGTTAAACATTTACATTTTACATTACATTTTTTTTTTAATTTCTTTTTAAGTCCCATAGTGCTGAGAACCCTGAAACTTTGGATGAAATTTATAATAGAAAATCTGTTTTACTGACGTTGATAGCTGTGGTTTTATCCTGTAGCCCT
ATM	ATM_50	chr11	108151724	108151896	ACACTGACGACATGGTTCTACACCATAGTGCTGAGAACCCTGAAA	TACGGTAGCAGAGACTTGGTCTCCTTTTTCACAAGGTGAGGTTCTA	173	39	CCATAGTGCTGAGAACCCTGAAACTTTGGATGAAATTTATAATAGAAAATCTGTTTTACTGACGTTGATAGCTGTGGTTTTATCCTGTAGCCCTATCTGCGAAAAACAGGCTTTGTTTGCCCTGTGTAAATCTGTGAAAGAGAATGGATTAGAACCTCACCTTGTGAAAAAGG
ATM	ATM_51	chr11	108151805	108151985	ACACTGACGACATGGTTCTACAATCCTGTAGCCCTATCTGCGAAA	TACGGTAGCAGAGACTTGGTCTAAGTGCCACTCAGAAAATCTAGC	181	36	ATCCTGTAGCCCTATCTGCGAAAAACAGGCTTTGTTTGCCCTGTGTAAATCTGTGAAAGAGAATGGATTAGAACCTCACCTTGTGAAAAAGGTATATATGGATGAGTATTTTATTAGAAGCTTCCTTAGGTCACTGTGAAATAATTTAAAAAGTTAAAGCTAGATTTTCTGAGTGGCACTT
ATM	ATM_52	chr11	108153336	108153531	ACACTGACGACATGGTTCTACAtgaATGTTGTTTCTAGGTCCTACTC	TACGGTAGCAGAGACTTGGTCTAGATTTAGCCATTCCAAAACCAGA	196	29	tgaATGTTGTTTCTAGGTCCTACTCTAAATAATATTAACAAGCATTTAAATGATTTATTTTTTTCATTTTTCTTAACACATTGACTTTTTGGTTCGTGCAGGTTTTAGAGAAAGTTTCTGAAACTTTTGGATATAGACGTTTAGAAGACTTTATGGCATCTCATTTAGATTATCTGGTTTTGGAATGGCTAAATCT	One primer sits in the repeat region
ATM	ATM_53	chr11	108153425	108153622	ACACTGACGACATGGTTCTACATGGTTCGTGCAGGTTTTAGAGAA	TACGGTAGCAGAGACTTGGTCTTCATGTATAAACTTACCTATAGAAATCCTCAAT	198	30	TGGTTCGTGCAGGTTTTAGAGAAAGTTTCTGAAACTTTTGGATATAGACGTTTAGAAGACTTTATGGCATCTCATTTAGATTATCTGGTTTTGGAATGGCTAAATCTTCAAGATACTGAATACAACTTATCTTCTTTTCCTTTTATTTTATTAAACTACACAAATATTGAGGATTTCTATAGGTAAGTTTATACATGA
ATM	ATM_54	chr11	108153489	108153681	ACACTGACGACATGGTTCTACATGGCATCTCATTTAGATTATCTGGT	TACGGTAGCAGAGACTTGGTCTGGTGAGGGGACTTGCTAAGTATT	193	28	TGGCATCTCATTTAGATTATCTGGTTTTGGAATGGCTAAATCTTCAAGATACTGAATACAACTTATCTTCTTTTCCTTTTATTTTATTAAACTACACAAATATTGAGGATTTCTATAGGTAAGTTTATACATGACATATGTGAAATTTGTTTAATTTAAAATTAGTTAACAATACTTAGCAAGTCCCCTCACC
ATM	ATM_131	chr11	108154852	108155023	ACACTGACGACATGGTTCTACACTTTAATGCTGATGGTATTAAAACAG	TACGGTAGCAGAGACTTGGTCTAGCAATGGACTTCACCTCATC	172	26	CTTTAATGCTGATGGTATTAAAACAGTTTTTAAGAACTATTTTATAAAATTTTACTTGGAAAAGTTATATATAACCTGTATTTTAAATTTTTCTATTTTTAGATCTTGTTATAAGGTTTTGATTCCACATCTGGTGATTAGAAGTCATTTTGATGAGGTGAAGTCCATTGCT
ATM	ATM_132	chr11	108154941	108155114	ACACTGACGACATGGTTCTACATTTCTATTTTTAGATCTTGTTATAAGGTTTTGATT	TACGGTAGCAGAGACTTGGTCTTACCCTCATAGGCAAAATAAGGAAG	174	34	TTTCTATTTTTAGATCTTGTTATAAGGTTTTGATTCCACATCTGGTGATTAGAAGTCATTTTGATGAGGTGAAGTCCATTGCTAATCAGATTCAAGAGGACTGGAAAAGTCTTCTAACAGACTGCTTTCCAAAGATTCTTGTAAATATTCTTCCTTATTTTGCCTATGAGGGTA
ATM	ATM_56	chr11	108155026	108155211	ACACTGACGACATGGTTCTACATCAGATTCAAGAGGACTGGAAAAGT	TACGGTAGCAGAGACTTGGTCTTGAAGCCATACCTGTTTTCCCAA	186	40	TCAGATTCAAGAGGACTGGAAAAGTCTTCTAACAGACTGCTTTCCAAAGATTCTTGTAAATATTCTTCCTTATTTTGCCTATGAGGGTACCAGAGACAGTGGGATGGCACAGCAAAGAGAGACTGCTACCAAGGTCTATGATATGCTTAAAAGTGAAAACTTATTGGGAAAACAGGTATGGCTTCA
ATM	ATM_57	chr11	108155137	108155332	ACACTGACGACATGGTTCTACAGCAAAGAGAGACTGCTACCAAGG	TACGGTAGCAGAGACTTGGTCTGCTAGATAATGATTACCACAAGCTAAGT	196	31	GCAAAGAGAGACTGCTACCAAGGTCTATGATATGCTTAAAAGTGAAAACTTATTGGGAAAACAGGTATGGCTTCAATTTTTATGTACTTTTCATTCCCTGAATGATATGAGATATAACCTTTAAGTTTTAAGGCTATTTATTCGATTTATTCGTATTTATATATTGAAACTTAGCTTGTGGTAATCATTATCTAGC
ATM	ATM_58	chr11	108158251	108158445	ACACTGACGACATGGTTCTACAAATATATGCCTTTTGAGCTGTCTTG	TACGGTAGCAGAGACTTGGTCTTACCCTGAAAAGTCACAGAGGTC	195	36	AATATATGCCTTTTGAGCTGTCTTGACGTTCACAGatataaaatattaaatatattttaattttGTGCCCTTGCAGATTGATCACTTATTCATTAGTAATTTACCAGAGATTGTGGTGGAGTTATTGATGACGTTACATGAGCCAGCAAATTCTAGTGCCAGTCAGAGCACTGACCTCTGTGACTTTTCAGGGTA
ATM	ATM_59	chr11	108158316	108158499	ACACTGACGACATGGTTCTACATGCCCTTGCAGATTGATCACTTA	TACGGTAGCAGAGACTTGGTCTACTTCTTTAAAAACTTGTGAAGTTAGAGC	184	38	TGCCCTTGCAGATTGATCACTTATTCATTAGTAATTTACCAGAGATTGTGGTGGAGTTATTGATGACGTTACATGAGCCAGCAAATTCTAGTGCCAGTCAGAGCACTGACCTCTGTGACTTTTCAGGGTATGTACATTTTAAACTTAGAGAACTAGCTCTAACTTCACAAGTTTTTAAAGAAGT
ATM	ATM_60	chr11	108159628	108159799	ACACTGACGACATGGTTCTACATCATTTTGGAAGTTCACTGGTCTA	TACGGTAGCAGAGACTTGGTCTTTTAACTTGGTTTTATGACAATTGCTG	172	35	TCATTTTGGAAGTTCACTGGTCTATGAACAAAACTTTTTAAAACGATGACTGTATTTTTTCCCTTAACTCTGTTAGGGATTTGGATCCTGCTCCTAATCCACCTCATTTTCCATCGCATGTGATTAAAGCAACATTTGCCTATATCAGCAATTGTCATAAAACCAAGTTAAA	Multiple hits
ATM	ATM_61	chr11	108159697	108159872	ACACTGACGACATGGTTCTACACTGTTAGGGATTTGGATCCTGCT	TACGGTAGCAGAGACTTGGTCTAAGAAGGAATGTTCTATTATTAAACTCATCA	176	34	CTGTTAGGGATTTGGATCCTGCTCCTAATCCACCTCATTTTCCATCGCATGTGATTAAAGCAACATTTGCCTATATCAGCAATTGTCATAAAACCAAGTTAAAAAGCATTTTAGAAATTCTTTCCAAAAGCCCTGTAAGTATACATGATGAGTTTAATAATAGAACATTCCTTCTT
ATM	ATM_62	chr11	108160276	108160447	ACACTGACGACATGGTTCTACATGTAGCCGAGTATCTAATTAAACAAGT	TACGGTAGCAGAGACTTGGTCTTCTTTCAGTAATAAACTAACAAACAGGTG	172	29	TGTAGCCGAGTATCTAATTAAACAAGTTTTTACTAAATCTGTTTATTTTCTAGGATTCCTATCAGAAAATTCTTCTTGCCATATGTGAGCAAGCAGCTGAAACAAATAATGTTTATAAGAAGCACAGAATTCTTAAAATATATCACCTGTTTGTTAGTTTATTACTGAAAGA
ATM	ATM_63	chr11	108160360	108160539	ACACTGACGACATGGTTCTACAGTGAGCAAGCAGCTGAAACAAAT	TACGGTAGCAGAGACTTGGTCTATGTTATTTACCTTTGGTTGATATAGTGAAT	180	32	GTGAGCAAGCAGCTGAAACAAATAATGTTTATAAGAAGCACAGAATTCTTAAAATATATCACCTGTTTGTTAGTTTATTACTGAAAGATATAAAAAGTGGCTTAGGAGGAGCTTGGGCCTTTGTTCTTCGAGACGTTATTTATACTTTGATTCACTATATCAACCAAAGGTAAATAACAT
ATM	ATM_64	chr11	108160418	108160588	ACACTGACGACATGGTTCTACATCACCTGTTTGTTAGTTTATTACTGAAAG	TACGGTAGCAGAGACTTGGTCTaaAAACAGGAAGAACAGGATAGAAAGA	171	33	TCACCTGTTTGTTAGTTTATTACTGAAAGATATAAAAAGTGGCTTAGGAGGAGCTTGGGCCTTTGTTCTTCGAGACGTTATTTATACTTTGATTCACTATATCAACCAAAGGTAAATAACATATTTAGACCAATATATAAGCAGTCTTTCTATCCTGTTCTTCCTGTTTtt	One primer sits in the repeat region
ATM	ATM_65	chr11	108163250	108163437	ACACTGACGACATGGTTCTACAAGAGATGCTGAACAAAAGGACTTC	TACGGTAGCAGAGACTTGGTCTTACAGTAAGTCACGGCTGTCTGG	188	37	AGAGATGCTGAACAAAAGGACTTCTGAATGAATTTATTTCAGAGTAATTTTCCAGAACTTACTGGTTGTTGTTGTTTTTTTTTCTCCCTATATTAGGCCTTCTTGTATCATGGATGTGTCATTACGTAGCTTCTCCCTTTGTTGTGACTTATTAAGTCAGGTTTGCCAGACAGCCGTGACTTACTGTA
ATM	ATM_66	chr11	108163372	108163553	ACACTGACGACATGGTTCTACATACGTAGCTTCTCCCTTTGTTGT	TACGGTAGCAGAGACTTGGTCTAAATACCATTTTGAAGATGAGTCAGAAA	182	40	TACGTAGCTTCTCCCTTTGTTGTGACTTATTAAGTCAGGTTTGCCAGACAGCCGTGACTTACTGTAAGGATGCTCTAGAAAACCATCTTCATGTTATTGTTGGTACACTTATACCCCTTGTGTATGAGCAGGTGGAGGTTCAGAAACAGGTAATTTTCTGACTCATCTTCAAAATGGTATTT
ATM	ATM_67	chr11	108163979	108164165	ACACTGACGACATGGTTCTACATGTTGGCTTACTTTAAAATTATTTCTCTCC	TACGGTAGCAGAGACTTGGTCTTTGCTGAGTAATACGCAAATCCT	187	28	TGTTGGCTTACTTTAAAATTATTTCTCTCCttataattttttctttttaaattatatttaGGTATTGGACTTGTTGAAATACTTAGTGATAGATAACAAGGATAATGAAAACCTCTATATCACGATTAAGCTTTTAGATCCTTTTCCTGACCATGTTGTTTTTAAGGATTTGCGTATTACTCAGCAA
ATM	ATM_68	chr11	108164114	108164284	ACACTGACGACATGGTTCTACAAGATCCTTTTCCTGACCATGTTGTT	TACGGTAGCAGAGACTTGGTCTACTGCTAGAGCATTACAGATTTTTGA	171	32	AGATCCTTTTCCTGACCATGTTGTTTTTAAGGATTTGCGTATTACTCAGCAAAAAATCAAATACAGTAGAGGACCCTTTTCACTCTTGGAGGTAATAAAAATTTCATCATCTACTATTTTTTATTAGAGAACATAGTAGTACTTTTCAAAAATCTGTAATGCTCTAGCAGT
ATM	ATM_69	chr11	108165598	108165782	ACACTGACGACATGGTTCTACATTATTTCACAGGCTTAACCAATACG	TACGGTAGCAGAGACTTGGTCTAGAAGCTCTCATAATGTCCACCA	185	35	TTATTTCACAGGCTTAACCAATACGTGTTAAAAGCAAGTTACATTTTCTCTTTTAGGAAATTAACCATTTTCTCTCAGTAAGTGTTTATGATGCACTTCCATTGACAAGACTTGAAGGACTAAAGGATCTTCGAAGACAACTGGAACTACATAAAGATCAGATGGTGGACATTATGAGAGCTTCT
ATM	ATM_70	chr11	108165662	108165833	ACACTGACGACATGGTTCTACACCATTTTCTCTCAGTAAGTGTTTATGATGC	TACGGTAGCAGAGACTTGGTCTTCAAAAAGAAACAGGTAGAAATAGCC	172	38	CCATTTTCTCTCAGTAAGTGTTTATGATGCACTTCCATTGACAAGACTTGAAGGACTAAAGGATCTTCGAAGACAACTGGAACTACATAAAGATCAGATGGTGGACATTATGAGAGCTTCTCAGGGTGCTAATTTTAAATGACATGGGCTATTTCTACCTGTTTCTTTTTGA
ATM	ATM_71	chr11	108167957	108168135	ACACTGACGACATGGTTCTACAAAACAAAAGTGTTGTCTTCATGCTA	TACGGTAGCAGAGACTTGGTCTTCACGCAGCGCATGACT	179	34	AAACAAAAGTGTTGTCTTCATGCTAGTTTAAACTAATTTTTAAAAAATTATTTCTAGATAATCCGCAAGATGGGATTATGGTGAAACTAGTTGTCAATTTGTTGCAGTTATCCAAGATGGCAATAAACCACACTGGTGAAAAAGAAGTTCTAGGTAAACTAcagtcatgcgctgcgtga	One primer sits in the repeat region
ATM	ATM_72	chr11	108170341	108170539	ACACTGACGACATGGTTCTACAAGTACAGAAAAACAGCATTATAGTTTTGA	TACGGTAGCAGAGACTTGGTCTACTTAAGGGCCTTGGTATAAGATGC	199	34	AGTACAGAAAAACAGCATTATAGTTTTGAAATTAGAAAATTTCAGTTTTATGTATGATCTCTTACCTATGACTCTACTGAAATAGAATTTCTATATGTAGAGGCTGTTGGAAGCTGCTTGGGAGAAGTGGGTCCTATAGATTTCTCTACCATAGCTATACAACATAGTAAAGATGCATCTTATACCAAGGCCCTTAAGT
ATM	ATM_73	chr11	108170456	108170645	ACACTGACGACATGGTTCTACAGCTTGGGAGAAGTGGGTCCTAT	TACGGTAGCAGAGACTTGGTCTGAGATTACATATAAGGTATCAATAAATACTCACCA	190	37	GCTTGGGAGAAGTGGGTCCTATAGATTTCTCTACCATAGCTATACAACATAGTAAAGATGCATCTTATACCAAGGCCCTTAAGTTATTTGAAGATAAAGAACTTCAGTGGACCTTCATAATGCTGACCTACCTGAATAACACACTGGTAGAAGATTGGTGAGTATTTATTGATACCTTATATGTAATCTC
ATM	ATM_74	chr11	108170556	108170731	ACACTGACGACATGGTTCTACAACTTCAGTGGACCTTCATAATGCT	TACGGTAGCAGAGACTTGGTCTAGACACTGAGATTTAAAAAAGGACAAA	176	34	ACTTCAGTGGACCTTCATAATGCTGACCTACCTGAATAACACACTGGTAGAAGATTGGTGAGTATTTATTGATACCTTATATGTAATCTCAATATGACATTCATGGAGAATGATACTTCACACAAATAGATATTCTCAGTAACTAAAGCTTTGTCCTTTTTTAAATCTCAGTGTCT
ATM	ATM_75	chr11	108172289	108172487	ACACTGACGACATGGTTCTACAAGTTTTGAAATTTTTTCAGTGGAGGT	TACGGTAGCAGAGACTTGGTCTGATAGGCCAGCATTGGATCTGTT	199	35	AGTTTTGAAATTTTTTCAGTGGAGGTTAACATTCATCAAGATTAATAACTGGTGTACTTGATAGGCATTTGAATTGTTTTTTTCAGTGTCAAAGTTCGATCAGCAGCTGTTACCTGTTTGAAAAACATTTTAGCCACAAAGACTGGACATAGTTTCTGGGAGATTTATAAGATGACAACAGATCCAATGCTGGCCTATC
ATM	ATM_76	chr11	108172386	108172571	ACACTGACGACATGGTTCTACAGATCAGCAGCTGTTACCTGTTTG	TACGGTAGCAGAGACTTGGTCTACAGAACTGTTTTAGATATGCTGGGT	186	35	GATCAGCAGCTGTTACCTGTTTGAAAAACATTTTAGCCACAAAGACTGGACATAGTTTCTGGGAGATTTATAAGATGACAACAGATCCAATGCTGGCCTATCTACAGCCTTTTAGAACATCAAGAAAAAAGGTCTCTTAAGTAATAAATGTTTATTGAATACCCAGCATATCTAAAACAGTTCTGT
ATM	ATM_77	chr11	108173515	108173710	ACACTGACGACATGGTTCTACATGTGTAGGAAAGGTACAATGATTTCCA	TACGGTAGCAGAGACTTGGTCTCCACTGTCCAAAAAAGCACAAGT	196	35	TGTGTAGGAAAGGTACAATGATTTCCACTTCTCTTATTTACATTTTCTAATCCCTTTCTTTCTAGTTTTTAGAAGTACCCAGATTTGACAAAGAAAACCCTTTTGAAGGCCTGGATGATATAAATCTGTGGATTCCTCTAAGTGAAAATCATGACATTTGGATAAAGACACTGACTTGTGCTTTTTTGGACAGTGG
ATM	ATM_78	chr11	108173609	108173802	ACACTGACGACATGGTTCTACAAAACCCTTTTGAAGGCCTGGATG	TACGGTAGCAGAGACTTGGTCTACAGGTCATAAACAAGGAATTATATCAGAC	194	34	AAACCCTTTTGAAGGCCTGGATGATATAAATCTGTGGATTCCTCTAAGTGAAAATCATGACATTTGGATAAAGACACTGACTTGTGCTTTTTTGGACAGTGGAGGCACAAAATGTGAAATTCTTCAATTATTAAAGCCAATGTGTGAAGTAAGAAGATTAATTAGTCTGATATAATTCCTTGTTTATGACCTGT
ATM	ATM_79	chr11	108175309	108175507	ACACTGACGACATGGTTCTACAATATGTCAACGGGGCATGAAAAT	TACGGTAGCAGAGACTTGGTCTCCTGAACATGTGTAGAAAGCAGA	199	31	ATATGTCAACGGGGCATGAAAATTTTAAGTAAAATGTATTAATTTTACTCATTTTTACTCAAACTATTGGGTGGATTTGTTTGTATATTCTAGGTGAAAACTGACTTTTGTCAGACTGTACTTCCATACTTGATTCATGATATTTTACTCCAAGATACAAATGAATCATGGAGAAATCTGCTTTCTACACATGTTCAGG
ATM	ATM_80	chr11	108175408	108175579	ACACTGACGACATGGTTCTACAACTGACTTTTGTCAGACTGTACTTC	TACGGTAGCAGAGACTTGGTCTCTGAATCCAAGTTTGCAGGGGTT	172	41	ACTGACTTTTGTCAGACTGTACTTCCATACTTGATTCATGATATTTTACTCCAAGATACAAATGAATCATGGAGAAATCTGCTTTCTACACATGTTCAGGGATTTTTCACCAGCTGTCTTCGACACTTCTCGCAAACGAGCCGATCCACAACCCCTGCAAACTTGGATTCAG
ATM	ATM_81	chr11	108175504	108175674	ACACTGACGACATGGTTCTACACAGGGATTTTTCACCAGCTGTCT	TACGGTAGCAGAGACTTGGTCTAATCCTGTAAAGTGCTTTTAGTGGGA	171	39	CAGGGATTTTTCACCAGCTGTCTTCGACACTTCTCGCAAACGAGCCGATCCACAACCCCTGCAAACTTGGATTCAGGTATTCTATTAAATTTTTAACATTAATACTGTAAACTCAGTTCTAGAGAAAGATGGATTTAAGATGGAATCCCACTAAAAGCACTTTACAGGATT
ATM	ATM_82	chr11	108178569	108178745	ACACTGACGACATGGTTCTACAGAAGGTGTGTAAGCAAGAATGCC	TACGGTAGCAGAGACTTGGTCTTCCTAAACGTAAGAAGCAACACTCA	177	40	GAAGGTGTGTAAGCAAGAATGCCTGGGACTGAGGGGAGATATTTTTGTTTGTCAGAGTCAGAGCACTTTTTCCGATGCTGTTTGGATAAAAAATCACAAAGAACAATGCTTGCTGTTGTGGACTACATGAGAAGACAAAAGAGGTAATGTAATGAGTGTTGCTTCTTACGTTTAGGA
ATM	ATM_83	chr11	108180792	108180990	ACACTGACGACATGGTTCTACAAAGCAGTCACTACCATTGTATTCTA	TACGGTAGCAGAGACTTGGTCTGTAAAGCTGTAAAGTGAGCAGCA	199	32	AAGCAGTCACTACCATTGTATTCTATATCAACATGCTTTTATTTTGATATTGAAGTTTAAAAAAGTGAATGACATTATATCTCATTTTTCTTTAGACCTTCTTCAGGAACAATTTTTAATGATGCTTTCTGGCTGGATTTAAATTATCTAGAAGTTGCCAAGGTAGCTCAGTCTTGTGCTGCTCACTTTACAGCTTTAC
ATM	ATM_84	chr11	108180910	108181102	ACACTGACGACATGGTTCTACAATGATGCTTTCTGGCTGGATTTA	TACGGTAGCAGAGACTTGGTCTACCCTTATTGAGACAATGCCAAC	193	34	ATGATGCTTTCTGGCTGGATTTAAATTATCTAGAAGTTGCCAAGGTAGCTCAGTCTTGTGCTGCTCACTTTACAGCTTTACTCTATGCAGAAATCTATGCAGATAAGAAAAGTATGGATGATCAAGAGAAAAGGTAATGGAATTTAGAATTTTTGGTTTTTAAAATTAATGTTGGCATTGTCTCAATAAGGGT
ATM	ATM_85	chr11	108183082	108183269	ACACTGACGACATGGTTCTACATCAGGAGCTTCCAAATAGTATGTTCT	TACGGTAGCAGAGACTTGGTCTATGAGATAAATACTGTCATAAATAATAGAGCC	188	32	TCAGGAGCTTCCAAATAGTATGTTCTCATTAAAAGAGGTGTTCTTGTGACAAACAGAAGTCTTGCATTTGAAGAAGGAAGCCAGAATACAACTATTTCTAGCTTGAGTGAAAAAAGTAAAGAAGAAACTGGAATAAGTTTACAGGTAAATATTAGAGGCTCTATTATTTATGACAGTATTTATCTCAT
ATM	ATM_86	chr11	108186449	108186630	ACACTGACGACATGGTTCTACAAGTTGGGAGTTACATATTGGTAATGA	TACGGTAGCAGAGACTTGGTCTGGGTTGTAACATCTTCCCTCCAC	182	35	AGTTGGGAGTTACATATTGGTAATGATACAATTTAAAATTTGCTAAATTTATAGACCGATTTTTTTTCCTTCTTCAATTTTTGTTGTTTCCATGTTTTCAGGATCTTCTCTTAGAAATCTACAGAAGTATAGGGGAGCCAGATAGTTTGTATGGCTGTGGTGGAGGGAAGATGTTACAACCC
ATM	ATM_87	chr11	108186584	108186775	ACACTGACGACATGGTTCTACAAGCCAGATAGTTTGTATGGCTGT	TACGGTAGCAGAGACTTGGTCTCTTTGCCCCACATTGCTTCG	192	37	AGCCAGATAGTTTGTATGGCTGTGGTGGAGGGAAGATGTTACAACCCATTACTAGGTAAATTGCATTTTTCTAAACAACGGTATAGTAATTCTGTTTATGAAGGAGTTATGTGTGTGTAAAACCCAAAGCTATTTTCACAATCTTTTCTTATAGACTACGAACATATGAACACGAAGCAATGTGGGGCAAAG
ATM	ATM_88	chr11	108186693	108186863	ACACTGACGACATGGTTCTACATGTGTGTGTAAAACCCAAAGCTA	TACGGTAGCAGAGACTTGGTCTACCAAATCTGGGAAAAAATGTACCTG	171	42	TGTGTGTGTAAAACCCAAAGCTATTTTCACAATCTTTTCTTATAGACTACGAACATATGAACACGAAGCAATGTGGGGCAAAGCCCTAGTAACATATGACCTCGAAACAGCAATCCCCTCATCAACACGCCAGGCAGGAATCATTCAGGTACATTTTTTCCCAGATTTGGT
ATM	ATM_89	chr11	108186747	108186927	ACACTGACGACATGGTTCTACAATATGAACACGAAGCAATGTGGG	TACGGTAGCAGAGACTTGGTCTTCTGGCTGTGTAAATATCCACCAA	181	44	ATATGAACACGAAGCAATGTGGGGCAAAGCCCTAGTAACATATGACCTCGAAACAGCAATCCCCTCATCAACACGCCAGGCAGGAATCATTCAGGTACATTTTTTCCCAGATTTGGTAAAGCCATCACTAGTGTAGTGCTGAGGTTATTTCAGTATGTTGGTGGATATTTACACAGCCAGA
ATM	ATM_90	chr11	108188040	108188235	ACACTGACGACATGGTTCTACATCTGGTTTTCTGTTGATATCTTTGATTACT	TACGGTAGCAGAGACTTGGTCTAATGGTCCCACTGCATATTCCTC	196	36	TCTGGTTTTCTGTTGATATCTTTGATTACTTAACTTAAAAACAAAATAACTCCTGTTTAGGCCTTGCAGAATTTGGGACTCTGCCATATTCTTTCCGTCTATTTAAAAGGATTGGATTATGAAAATAAAGACTGGTGTCCTGAACTAGAAGAACTTCATTACCAAGCAGCATGGAGGAATATGCAGTGGGACCATT
ATM	ATM_91	chr11	108188115	108188299	ACACTGACGACATGGTTCTACAGGACTCTGCCATATTCTTTCCGT	TACGGTAGCAGAGACTTGGTCTTTTAGAATGAGGAGAGAGGCAAAA	185	38	GGACTCTGCCATATTCTTTCCGTCTATTTAAAAGGATTGGATTATGAAAATAAAGACTGGTGTCCTGAACTAGAAGAACTTCATTACCAAGCAGCATGGAGGAATATGCAGTGGGACCATTGCACTTCCGTCAGGTAAGAAATTTGACTTGATTTTTTTTTTTTTGCCTCTCTCCTCATTCTAAA
ATM	ATM_92	chr11	108190622	108190814	ACACTGACGACATGGTTCTACAACATGTATATCTTAGGGTTCTGTTTTTAAG	TACGGTAGCAGAGACTTGGTCTAATACAGTAACTTTGTCTTTTCATAATACCT	193	31	ACATGTATATCTTAGGGTTCTGTTTTTAAGTATATTTTTTTCTTTGACTTATCTCACAGCAAAGAAGTAGAAGGAACCAGTTACCATGAATCATTGTACAATGCTCTACAATCTCTAAGAGACAGAGAATTCTCTACATTTTATGAAAGTCTCAAATATGCCAGGTATTATGAAAAGACAAAGTTACTGTATT
ATM	ATM_93	chr11	108190684	108190880	ACACTGACGACATGGTTCTACAAGAAGTAGAAGGAACCAGTTACCA	TACGGTAGCAGAGACTTGGTCTTGCAAATCCTTACATTAAAATTGTTTCTCA	197	31	AGAAGTAGAAGGAACCAGTTACCATGAATCATTGTACAATGCTCTACAATCTCTAAGAGACAGAGAATTCTCTACATTTTATGAAAGTCTCAAATATGCCAGGTATTATGAAAAGACAAAGTTACTGTATTTTAACATTTAATGTCATGGCTTCTTTTCTGAAAACTTGAGAAACAATTTTAATGTAAGGATTTGCA
ATM	ATM_94	chr11	108191966	108192144	ACACTGACGACATGGTTCTACAACATTTATTTCCCTGAAAACCTCTTCT	TACGGTAGCAGAGACTTGGTCTGAGAAAAGCTCCCCAATGCTTTC	179	42	ACATTTATTTCCCTGAAAACCTCTTCTTTATTTTCAGAGTGTCTTTTCTTTTTTGCTACTAGAGTAAAAGAAGTGGAAGAGATGTGTAAGCGCAGCCTTGAGTCTGTGTATTCGCTCTATCCCACACTTAGCAGGTTGCAGGCCATTGGAGAGCTGGAAAGCATTGGGGAGCTTTTCTC
ATM	ATM_95	chr11	108192034	108192204	ACACTGACGACATGGTTCTACAAGAAGTGGAAGAGATGTGTAAGCG	TACGGTAGCAGAGACTTGGTCTACTATTGGTAACAGAAAAGCTGCAC	171	44	AGAAGTGGAAGAGATGTGTAAGCGCAGCCTTGAGTCTGTGTATTCGCTCTATCCCACACTTAGCAGGTTGCAGGCCATTGGAGAGCTGGAAAGCATTGGGGAGCTTTTCTCAAGGTATGTAATTCGTATGACTTTGTTATCCTAAAGTGCAGCTTTTCTGTTACCAATAGT
ATM	ATM_96	chr11	108195995	108196166	ACACTGACGACATGGTTCTACATCATTTCTCTTGCTTACATGAACTCT	TACGGTAGCAGAGACTTGGTCTCAGGATCTCCAAAATGACTGTGC	172	42	TCATTTCTCTTGCTTACATGAACTCTATGTCGTGGCATTCAGATCAGTCACACATAGACAACTCTCTGAAGTATATATTAAGTGGCAGAAACACTCCCAGCTTCTCAAGGACAGTGATTTTAGTTTTCAGGAGCCTATCATGGCTCTACGCACAGTCATTTTGGAGATCCTG
ATM	ATM_97	chr11	108196070	108196241	ACACTGACGACATGGTTCTACATATTAAGTGGCAGAAACACTCCC	TACGGTAGCAGAGACTTGGTCTAGAGAGTTCTACAAGGTGTTTGGT	172	41	TATTAAGTGGCAGAAACACTCCCAGCTTCTCAAGGACAGTGATTTTAGTTTTCAGGAGCCTATCATGGCTCTACGCACAGTCATTTTGGAGATCCTGATGGAAAAGGAAATGGACAACTCACAAAGAGAATGTATTAAGGACATTCTCACCAAACACCTTGTAGAACTCTCT
ATM	ATM_98	chr11	108196144	108196316	ACACTGACGACATGGTTCTACAGCACAGTCATTTTGGAGATCCTG	TACGGTAGCAGAGACTTGGTCTAGGAAAGTCAAGAGGTAAGATGAC	173	38	GCACAGTCATTTTGGAGATCCTGATGGAAAAGGAAATGGACAACTCACAAAGAGAATGTATTAAGGACATTCTCACCAAACACCTTGTAGAACTCTCTATACTGGCCAGAACTTTCAAGAACACTCAGGTAAATACAATTTAAAACTATGTCATCTTACCTCTTGACTTTCCT
ATM	ATM_99	chr11	108196725	108196899	ACACTGACGACATGGTTCTACAATTCATGGTAGTAGTATCAGTAGTAAAAGT	TACGGTAGCAGAGACTTGGTCTCAAGACTCTGCTCCTTTTTTGCC	175	38	ATTCATGGTAGTAGTATCAGTAGTAAAAGTATTTATTCCCATATGTCATTTTCATTTCAGCTCCCTGAAAGGGCAATATTTCAAATTAAACAGTACAATTCAGTTAGCTGTGGAGTCTCTGAGTGGCAGCTGGAAGAAGCACAAGTATTCTGGGCAAAAAAGGAGCAGAGTCTTG
ATM	ATM_100	chr11	108196815	108196990	ACACTGACGACATGGTTCTACACAGTACAATTCAGTTAGCTGTGGAG	TACGGTAGCAGAGACTTGGTCTACAGTAAAACACTAATCCAGCCAA	176	44	CAGTACAATTCAGTTAGCTGTGGAGTCTCTGAGTGGCAGCTGGAAGAAGCACAAGTATTCTGGGCAAAAAAGGAGCAGAGTCTTGCCCTGAGTATTCTCAAGCAAATGATCAAGAAGTTGGATGCCAGCTGTGCAGCGGTTTGTTTTTTTTATTGGCTGGATTAGTGTTTTACTGT
ATM	ATM_101	chr11	108198316	108198507	ACACTGACGACATGGTTCTACAGTTGGGTACAGTCATGGTAATGC	TACGGTAGCAGAGACTTGGTCTAGGGTTGCTCCAAAAATCTTACCT	192	40	GTTGGGTACAGTCATGGTAATGCATTATATTTTAAGATTTTGCCTTTCTTATACAGAACAATCCCAGCCTAAAACTTACATACACAGAATGTCTGAGGGTTTGTGGCAACTGGTTAGCAGAAACGTGCTTAGAAAATCCTGCGGTCATCATGCAGACCTATCTAGAAAAGGTAAGATTTTTGGAGCAACCCT
ATM	ATM_102	chr11	108198368	108198557	ACACTGACGACATGGTTCTACAACAGAACAATCCCAGCCTAAAACT	TACGGTAGCAGAGACTTGGTCTATTGATCTTGATGAAAAGATGAAGCA	190	39	ACAGAACAATCCCAGCCTAAAACTTACATACACAGAATGTCTGAGGGTTTGTGGCAACTGGTTAGCAGAAACGTGCTTAGAAAATCCTGCGGTCATCATGCAGACCTATCTAGAAAAGGTAAGATTTTTGGAGCAACCCTTAAGATAGTTACTTAGCATGAATATGCTTCATCTTTTCATCAAGATCAAT
ATM	ATM_103	chr11	108199673	108199848	ACACTGACGACATGGTTCTACAACCTTAATTTGAGTGATTCTTTAGATGTATT	TACGGTAGCAGAGACTTGGTCTTGAGTATCTGAAAACCGGGCTAA	176	32	ACCTTAATTTGAGTGATTCTTTAGATGTATTTAGTATTTGTAAATATAATTTAAATTGGTTGTGTTTTCTTGAAGGCAGTAGAAGTTGCTGGAAATTATGATGGAGAAAGTAGTGATGAGCTAAGAAATGGAAAAATGAAGGCATTTCTCTCATTAGCCCGGTTTTCAGATACTCA
ATM	ATM_104	chr11	108199730	108199910	ACACTGACGACATGGTTCTACAGGTTGTGTTTTCTTGAAGGCAGTAG	TACGGTAGCAGAGACTTGGTCTTCAGGAGAGCTTGCTTGTTTTCA	181	37	GGTTGTGTTTTCTTGAAGGCAGTAGAAGTTGCTGGAAATTATGATGGAGAAAGTAGTGATGAGCTAAGAAATGGAAAAATGAAGGCATTTCTCTCATTAGCCCGGTTTTCAGATACTCAATACCAAAGAATTGAAAACTACATGAAATCATCGGAATTTGAAAACAAGCAAGCTCTCCTGA
ATM	ATM_105	chr11	108199828	108200004	ACACTGACGACATGGTTCTACAAGCCCGGTTTTCAGATACTCAAT	TACGGTAGCAGAGACTTGGTCTTGGTGAACATAAAATTGTCACTTGTAGAAA	177	37	AGCCCGGTTTTCAGATACTCAATACCAAAGAATTGAAAACTACATGAAATCATCGGAATTTGAAAACAAGCAAGCTCTCCTGAAAAGAGCCAAAGAGGAAGTAGGTCTCCTTAGGGAACATAAAATTCAGACAAACAGGTAACTAGGTTTCTACAAGTGACAATTTTATGTTCACCA
ATM	ATM_106	chr11	108200875	108201072	ACACTGACGACATGGTTCTACATGTGTGATTTTGTAGTTCTGTTAAAGTTC	TACGGTAGCAGAGACTTGGTCTTGTTCTTCTCCACTTAATAAGCAGTT	198	37	TGTGTGATTTTGTAGTTCTGTTAAAGTTCATGGCTTTTGTGTTTTACCTTAATTATTCTATGCAAGATACACAGTAAAGGTTCAGCGAGAGCTGGAGTTGGATGAATTAGCCCTGCGTGCACTGAAAGAGGATCGTAAACGCTTCTTATGTAAAGCAGTTGAAAATTATATCAACTGCTTATTAAGTGGAGAAGAACA
ATM	ATM_107	chr11	108200990	108201182	ACACTGACGACATGGTTCTACACGTGCACTGAAAGAGGATCGTAA	TACGGTAGCAGAGACTTGGTCTCACAGGGTAGAATATTGGGCTGA	193	40	CGTGCACTGAAAGAGGATCGTAAACGCTTCTTATGTAAAGCAGTTGAAAATTATATCAACTGCTTATTAAGTGGAGAAGAACATGATATGTGGGTATTCCGACTTTGTTCCCTCTGGCTTGAAAATTCTGGAGTTTCTGAAGTCAATGGCATGATGAAGGCAAGTGTTACTCAGCCCAATATTCTACCCTGTG
ATM	ATM_108	chr11	108202126	108202312	ACACTGACGACATGGTTCTACATGAAATACCTTGTTTCTTAATTTTGTGTC	TACGGTAGCAGAGACTTGGTCTttGTGGTTTGATTTTCAGGTTTACT	187	35	TGAAATACCTTGTTTCTTAATTTTGTGTCTTTTTTTTAATGGTAGAGAGACGGAATGAAGATTCCAACATATAAATTTTTGCCTCTTATGTACCAATTGGCTGCTAGAATGGGGACCAAGATGATGGGAGGCCTAGGATTTCATGAAGTCCTCAATAATGTAAGTAAACCTGAAAATCAAACCACaa	One primer sits in the repeat region
ATM	ATM_109	chr11	108202479	108202677	ACACTGACGACATGGTTCTACACAGGCATACACGCTCTACCC	TACGGTAGCAGAGACTTGGTCTGTTTGCATTTGCTAAGGCCAGT	199	32	CAGGCATACACGCTCTACCCACTGCAGTATCTAGACAGTAATACACATTTTAATGTTAAGCAAAATGAAAAATATGGATTATATTTTTTTGTTTATTTGCATAAATCTAATAGTTCTTTTCTTACAGCTAATCTCTAGAATTTCAATGGATCACCCCCATCACACTTTGTTTATTATACTGGCCTTAGCAAATGCAAAC
ATM	ATM_110	chr11	108202628	108202810	ACACTGACGACATGGTTCTACAATCACCCCCATCACACTTTGTTT	TACGGTAGCAGAGACTTGGTCTACTGAATATCACACTTCTAAAAGGTACG	183	37	ATCACCCCCATCACACTTTGTTTATTATACTGGCCTTAGCAAATGCAAACAGAGATGAATTTCTGACTAAACCAGAGGTAGCCAGAAGAAGCAGAATAACTAAAAATGTGCCTAAACAAAGCTCTCAGCTTGATGAGGTATTTGGATTAAACATACGTACCTTTTAGAAGTGTGATATTCAGT
ATM	ATM_111	chr11	108203392	108203580	ACACTGACGACATGGTTCTACATGTGCATAAATTCTGTTTTTCTCTTTGTTT	TACGGTAGCAGAGACTTGGTCTTAAGCATCACAAAGTGCCTCAAC	189	33	TGTGCATAAATTCTGTTTTTCTCTTTGTTTTTCTAACTCTGAGAAGTTTAAATGTTGGGTAGTTCCTTATGTAATGTTTTTTGTTTTTTATTAATAGGATCGAACAGAGGCTGCAAATAGAATAATATGTACTATCAGAAGTAGGAGACCTCAGATGGTCAGAAGTGTTGAGGCACTTTGTGATGCTTA
ATM	ATM_112	chr11	108203491	108203679	ACACTGACGACATGGTTCTACATCGAACAGAGGCTGCAAATAGAA	TACGGTAGCAGAGACTTGGTCTACAGAGAGTAACACAGCAAGAAAGT	189	37	TCGAACAGAGGCTGCAAATAGAATAATATGTACTATCAGAAGTAGGAGACCTCAGATGGTCAGAAGTGTTGAGGCACTTTGTGATGCTTATATTATATTAGCAAACTTAGATGCCACTCAGTGGAAGACTCAGAGAAGTATGTTTTTTTTAAAGAAGAAACGTTACTTTCTTGCTGTGTTACTCTCTGT
ATM	ATM_113	chr11	108204495	108204691	ACACTGACGACATGGTTCTACAGAGCCTGAACCACAGATTAGCAA	TACGGTAGCAGAGACTTGGTCTATTTCCATAGTAGGGACAACAACA	197	39	GAGCCTGAACCACAGATTAGCAACAAGTTGGGGCCAGTGGTATCTGCTGACTATTCCTGCTTGACCTTCAATGCTGTTCCTCAGTTTGTCACTAAAATCTCTTCATTTTTAAATACAGAAGGCATAAATATTCCAGCAGACCAGCCAATTACTAAACTTAAGAATTTAGAAGATGTTGTTGTCCCTACTATGGAAAT
ATM	ATM_114	chr11	108204623	108204802	ACACTGACGACATGGTTCTACATATTCCAGCAGACCAGCCAATTA	TACGGTAGCAGAGACTTGGTCTTGCCAATATTTAACCAATTTTGACCT	180	26	TATTCCAGCAGACCAGCCAATTACTAAACTTAAGAATTTAGAAGATGTTGTTGTCCCTACTATGGAAATTAAGGTAATTTGCAATTAACTCTTGATTTTTTTTAAACTAAATTTTTTTTAttagattgaaccatttgaaatagtatttttatgtaggtcaaaattggttaaatattggca	One primer sits in the repeat region
ATM	ATM_115	chr11	108205618	108205812	ACACTGACGACATGGTTCTACATGCCATTTATAATGTATTTTTCTTTAAGTGC	TACGGTAGCAGAGACTTGGTCTGCCATCGGAACCTACACAATCTA	195	33	TGCCATTTATAATGTATTTTTCTTTAAGTGCAAATAGTGTATCTGACCTATTATCAATCATGTTTATACTTTTATTAGGTGGACCACACAGGAGAATATGGAAATCTGGTGACTATACAGTCATTTAAAGCAGAATTTCGCTTAGCAGGAGGTGTAAATTTACCAAAAATAATAGATTGTGTAGGTTCCGATGGC
ATM	ATM_116	chr11	108205689	108205874	ACACTGACGACATGGTTCTACATTATTAGGTGGACCACACAGGAG	TACGGTAGCAGAGACTTGGTCTAAAACTCTAAGGGCTAAGCCAGA	186	41	TTATTAGGTGGACCACACAGGAGAATATGGAAATCTGGTGACTATACAGTCATTTAAAGCAGAATTTCGCTTAGCAGGAGGTGTAAATTTACCAAAAATAATAGATTGTGTAGGTTCCGATGGCAAGGAGAGGAGACAGCTTGTTAAGGTGAGCCTTCCCTTCTCTGGCTTAGCCCTTAGAGTTTT
ATM	ATM_117	chr11	108206475	108206666	ACACTGACGACATGGTTCTACACAGATTGGTTTGAGTGCCCTTTG	TACGGTAGCAGAGACTTGGTCTTTCCTCTTCCTAGTTTCCGTGTT	192	39	CAGATTGGTTTGAGTGCCCTTTGCTATTCTCAGATGACTCTGTGTTTTTATAATAAAATAAACTGTACTTGTTTATTCATGCTTAATTATTCTGAAGGGCCGTGATGACCTGAGACAAGATGCTGTCATGCAACAGGTCTTCCAGATGTGTAATACATTACTGCAGAGAAACACGGAAACTAGGAAGAGGAA
ATM	ATM_118	chr11	108206559	108206750	ACACTGACGACATGGTTCTACAAATTATTCTGAAGGGCCGTGATG	TACGGTAGCAGAGACTTGGTCTcacccaaccAAATGGCATCTTTTA	192	38	AATTATTCTGAAGGGCCGTGATGACCTGAGACAAGATGCTGTCATGCAACAGGTCTTCCAGATGTGTAATACATTACTGCAGAGAAACACGGAAACTAGGAAGAGGAAATTAACTATCTGTACTTATAAGGTAACTATTTGTACTTCTGTTAGTTCACCAAAAACATATAAAAGATGCCATTTggttgggtg	One primer sits in the repeat region
ATM	ATM_119	chr11	108213864	108214058	ACACTGACGACATGGTTCTACATTGCACTGACTCTGATAGCTGAA	TACGGTAGCAGAGACTTGGTCTGGCCTGTATCTTTTATGAGCACCA	195	41	TTGCACTGACTCTGATAGCTGAATGATCATCAAATGCTCTTTAATGGCCTTTTAAAATTAAAAGGTATTTAATCTGTAACTCCAGGTGGTTCCCCTCTCTCAGCGAAGTGGTGTTCTTGAATGGTGCACAGGAACTGTCCCCATTGGTGAATTTCTTGTTAACAATGAAGATGGTGCTCATAAAAGATACAGGCC
ATM	ATM_120	chr11	108213975	108214162	ACACTGACGACATGGTTCTACATGTTCTTGAATGGTGCACAGGA	TACGGTAGCAGAGACTTGGTCTGCTGTCAGCTTTAATAAGCCATT	188	37	TGTTCTTGAATGGTGCACAGGAACTGTCCCCATTGGTGAATTTCTTGTTAACAATGAAGATGGTGCTCATAAAAGATACAGGCCAAATGATTTCAGTGCCTTTCAGTGCCAAAAGAAAATGATGGTGAGTGACACCCAAAATTAAAGGTTATTGTAAGATTATTTAATGGCTTATTAAAGCTGACAGC
ATM	ATM_121	chr11	108216364	108216557	ACACTGACGACATGGTTCTACATCATCTTTATTGCCCCTATATCTGTC	TACGGTAGCAGAGACTTGGTCTTGCAGAAGTAACGGAAAACTGGT	194	26	tcatctttattgcccctatatctgtcatatTTTTATATAAAAATGTGTATATTAGTTTAATTGAACACAATATTGAAAAATAATTATATATATTCTCTATTTAAAGGAGGTGCAAAAAAAGTCTTTTGAAGAGAAATATGAAGTCTTCATGGATGTTTGCCAAAATTTTCAACCAGTTTTCCGTTACTTCTGCA	One primer sits in the repeat region
ATM	ATM_122	chr11	108216503	108216680	ACACTGACGACATGGTTCTACAGAAGTCTTCATGGATGTTTGCC	TACGGTAGCAGAGACTTGGTCTCCAAACAACAAAGTGCTCAATCT	178	38	GAAGTCTTCATGGATGTTTGCCAAAATTTTCAACCAGTTTTCCGTTACTTCTGCATGGAAAAATTCTTGGATCCAGCTATTTGGTTTGAGAAGCGATTGGCTTATACGCGCAGTGTAGCTACTTCTTCTATTGGTAATCTTCTTGTACATATAGTAGATTGAGCACTTTGTTGTTTGG
ATM	ATM_123	chr11	108217970	108218167	ACACTGACGACATGGTTCTACACAGTGATTTCAGATTGTTTGTTTCTTTTT	TACGGTAGCAGAGACTTGGTCTCTTGGTAGGCAAACAACATTCCA	198	32	CAGTGATTTCAGATTGTTTGTTTCTTTTTTCTCCAGTTGGTTACATACTTGGACTTGGTGATAGACATGTACAGAATATCTTGATAAATGAGCAGTCAGCAGAACTTGTACATATAGATCTAGGTAAGTAATAAAATCTATGTATCTATTCTTTTTAGTAAATATTTGGTCATCATGGAATGTTGTTTGCCTACCAAG
ATM	ATM_124	chr11	108224395	108224580	ACACTGACGACATGGTTCTACAAACATGTGGTTTCTTGCCTTTGT	TACGGTAGCAGAGACTTGGTCTATGCCCATGCCATCCACAATATC	186	39	AACATGTGGTTTCTTGCCTTTGTAAAGTTCACATTCTAACTGGAAAGAAAGTAAATTAGCTGTCAAACCTCCTAACTTCACTGTATTCTTTACTTTAGGTGTTGCTTTTGAACAGGGCAAAATCCTTCCTACTCCTGAGACAGTTCCTTTTAGACTCACCAGAGATATTGTGGATGGCATGGGCAT
ATM	ATM_125	chr11	108224489	108224668	ACACTGACGACATGGTTCTACATTAGGTGTTGCTTTTGAACAGGG	TACGGTAGCAGAGACTTGGTCTgcccagcCCATGTAATTTTGAC	180	42	TTAGGTGTTGCTTTTGAACAGGGCAAAATCCTTCCTACTCCTGAGACAGTTCCTTTTAGACTCACCAGAGATATTGTGGATGGCATGGGCATTACGGGTGTTGAAGGTGTCTTCAGAAGGTAAGTGATATGAAGTAAAGGAGGGAAATAATTTTTGATGTCAAAATTACATGGgctgggc	One primer sits in the repeat region
ATM	ATM_126	chr11	108225491	108225687	ACACTGACGACATGGTTCTACAACATTGGTGTGTAACAAAATCCGT	TACGGTAGCAGAGACTTGGTCTTGCTCTTCACATCAGTGACTTCC	197	36	ACATTGGTGTGTAACAAAATCCGTATTTATAATGTGTTTGACTCTAGATGCTGTGAGAAAACCATGGAAGTGATGAGAAACTCTCAGGAAACTCTGTTAACCATTGTAGAGGTAAAGTATTTTATAAGGAAGACTTTATTTTTTTTCTTACCAGGTAGACTGTGTATCTCATCAGGAAGTCACTGATGTGAAGAGCA
ATM	ATM_127	chr11	108235735	108235915	ACACTGACGACATGGTTCTACAACTGGTTCTACTGTTTCTAAGTATGTGA	TACGGTAGCAGAGACTTGGTCTGCATTCAGAGTAGGGTGAAGCTC	181	38	ACTGGTTCTACTGTTTCTAAGTATGTGATTAAAATGTACATTGTTCTTTTAATACATATGTTCTCTCTGTTTAGGTCCTTCTATATGATCCACTCTTTGACTGGACCATGAATCCTTTGAAAGCTTTGTATTTACAGCAGAGGCCGGAAGATGAAACTGAGCTTCACCCTACTCTGAATGC
ATM	ATM_128	chr11	108235828	108236007	ACACTGACGACATGGTTCTACATCTTTGACTGGACCATGAATCCTT	TACGGTAGCAGAGACTTGGTCTAGGCCTTGGGAATAAGAAAATCTG	180	42	TCTTTGACTGGACCATGAATCCTTTGAAAGCTTTGTATTTACAGCAGAGGCCGGAAGATGAAACTGAGCTTCACCCTACTCTGAATGCAGATGACCAAGAATGCAAACGAAATCTCAGGTGAGCAGTATTTTAAGAAGGTCCTGTTGTCAGTTTTTCAGATTTTCTTATTCCCAAGGCCT
ATM	ATM_129	chr11	108235973	108236167	ACACTGACGACATGGTTCTACATGTCAGTTTTTCAGATTTTCTTATTCCCA	TACGGTAGCAGAGACTTGGTCTGCAAATTCACTTGTCCACCAACA	195	40	TGTCAGTTTTTCAGATTTTCTTATTCCCAAGGCCTTTAAACTGTTCACCTCACTGAAACCTTTGTGTTTTTGTCCTTAGTGATATTGACCAGAGTTTCAACAAAGTAGCTGAACGTGTCTTAATGAGACTACAAGAGAAACTGAAAGGAGTGGAAGAAGGCACTGTGCTCAGTGTTGGTGGACAAGTGAATTTGC
ATM	ATM_130	chr11	108236071	108236269	ACACTGACGACATGGTTCTACAAACAAAGTAGCTGAACGTGTCTT	TACGGTAGCAGAGACTTGGTCTAGGCTGAATGAAAGGGTAATTCATA	199	44	AACAAAGTAGCTGAACGTGTCTTAATGAGACTACAAGAGAAACTGAAAGGAGTGGAAGAAGGCACTGTGCTCAGTGTTGGTGGACAAGTGAATTTGCTCATACAGCAGGCCATAGACCCCAAAAATCTCAGCCGACTTTTCCCAGGATGGAAAGCTTGGGTGTGATCTTCAGTATATGAATTACCCTTTCATTCAGCCT
BARD1	BARD1_1	chr2	215593349	215593545	ACACTGACGACATGGTTCTACAGCTCTCACAAACCGTGCAAAT	TACGGTAGCAGAGACTTGGTCTAGCGCTTCTGCACACAGTATATC	197	43	GCTCTCACAAACCGTGCAAATTCAATTTGAAATGTTCATCTGGTATAATATTCAGCTGTCAAGAGGAAGCAACTCAAAGGACATCACACAGTCTATAAACCAGCTCGAAGGAGCCTTCCAGACTTTGCCCTGCCGAACCCTCTCTGGGTGATAATTACACAAATCTTCATAGATGATATACTGTGTGCAGAAGCGCT
BARD1	BARD1_2	chr2	215593416	215593602	ACACTGACGACATGGTTCTACAAGCAACTCAAAGGACATCACACA	TACGGTAGCAGAGACTTGGTCTGTGACGTGACTCAGACCATCAAT	187	48	AGCAACTCAAAGGACATCACACAGTCTATAAACCAGCTCGAAGGAGCCTTCCAGACTTTGCCCTGCCGAACCCTCTCTGGGTGATAATTACACAAATCTTCATAGATGATATACTGTGTGCAGAAGCGCTGATCAGAATCGGGTCTCGCATGGTATGCGACTGTATTGATGGTCTGAGTCACGTCAC
BARD1	BARD1_3	chr2	215593507	215593685	ACACTGACGACATGGTTCTACAACAAATCTTCATAGATGATATACTGTGTGC	TACGGTAGCAGAGACTTGGTCTCAAACACCATCCAAAGGACAACC	179	49	ACAAATCTTCATAGATGATATACTGTGTGCAGAAGCGCTGATCAGAATCGGGTCTCGCATGGTATGCGACTGTATTGATGGTCTGAGTCACGTCACTGTCTGGCTTGGGCTTTCTACTGAGGATCTGGCCCCCACCTGCAGTGACGAGCTTAATAAGGTTGTCCTTTGGATGGTGTTTG
BARD1	BARD1_4	chr2	215593572	215593766	ACACTGACGACATGGTTCTACAGCGACTGTATTGATGGTCTGAGT	TACGGTAGCAGAGACTTGGTCTTCTGCCTTTAACAAATGTTTTCTCAT	195	46	GCGACTGTATTGATGGTCTGAGTCACGTCACTGTCTGGCTTGGGCTTTCTACTGAGGATCTGGCCCCCACCTGCAGTGACGAGCTTAATAAGGTTGTCCTTTGGATGGTGTTTGAAGGTTCCCCACAAATAGAAGTAGCATCCATCAAACAGCTTTGGCAACTGAAATAATGAGAAAACATTTGTTAAAGGCAGA
BARD1	BARD1_5	chr2	215595042	215595235	ACACTGACGACATGGTTCTACATGTAGCTGTTGAAAGGGCAGAAG	TACGGTAGCAGAGACTTGGTCTCAGGGGTAAAAGCATGTCTACGA	194	38	TGTAGCTGTTGAAAGGGCAGAAGTTCTTCCTGATGGTGATAATAATAGTATGTCATAATAAGAACAATGAAAGTTGTATTAAAAGAAAAATACCAGCTGTTCTCTGTTGAGCCTGCTTCTGCGTGGACCTTCAGGAATTTCATACTTTTCTTCCTGTTCACATACTTTTCTTCGTAGACATGCTTTTACCCCTG
BARD1	BARD1_6	chr2	215595141	215595339	ACACTGACGACATGGTTCTACATTCTCTGTTGAGCCTGCTTCTG	TACGGTAGCAGAGACTTGGTCTACTGCCATGAAGAAGAAAAACCAC	199	37	TTCTCTGTTGAGCCTGCTTCTGCGTGGACCTTCAGGAATTTCATACTTTTCTTCCTGTTCACATACTTTTCTTCGTAGACATGCTTTTACCCCTGACAAAAACACAAGAATTAAAGCAAACTAAGTATCAAGTGAGCACTATATCTCTCTCATTAAAATCAAGCAATTTACCTAAGTGGTTTTTCTTCTTCATGGCAGT
BARD1	BARD1_7	chr2	215609758	215609931	ACACTGACGACATGGTTCTACATCATTTCTTAATTCTCTCAAATCCAACA	TACGGTAGCAGAGACTTGGTCTACTTTGGCTTGTATCTTTCTTTCTCT	174	34	TCATTTCTTAATTCTCTCAAATCCAACACTTACATTCAAATTTTAGAATCCAGCATCCATTGAGAATCCCAAGCATACACTTCAAGGTACTTTGAACTGCATCACCAGGAACAACAACATGAGTTACTAAAATACAAAAAAAGCAGTAAGAGAAAGAAAGATACAAGCCAAAGT
BARD1	BARD1_8	chr2	215610371	215610545	ACACTGACGACATGGTTCTACATCAAAGGTAGTTCTCCAAAAGGAT	TACGGTAGCAGAGACTTGGTCTGTACTTATAGGCAGTGGGCTGTC	175	38	TCAAAGGTAGTTCTCCAAAAGGATCATCTATTTAACATTTTTTCTACCCCACCTCCCAAAATTCAAAATCCTCACCTGTACTGTCAAACTCAGTATATTTTTTAGCCTTAAGAATTACTGCAAGCTCACTGAGCATTTTCTGTTGTTCTGAAGACAGCCCACTGCCTATAAGTAC
BARD1	BARD1_9	chr2	215610440	215610635	ACACTGACGACATGGTTCTACACCTCACCTGTACTGTCAAACTCA	TACGGTAGCAGAGACTTGGTCTTGTCTTTGTCTAGTCGTCTAATGTT	196	40	CCTCACCTGTACTGTCAAACTCAGTATATTTTTTAGCCTTAAGAATTACTGCAAGCTCACTGAGCATTTTCTGTTGTTCTGAAGACAGCCCACTGCCTATAAGTACAAGAGGTCCATCCCTACGCTGCCCAGTGTTCATCTGTTAATATAAAAGGAGATACCAGTGTTAAAAACATTAGACGACTAGACAAAGACA
BARD1	BARD1_10	chr2	215617145	215617315	ACACTGACGACATGGTTCTACAtGTCCCAAAGCTAAATCCATACT	TACGGTAGCAGAGACTTGGTCTTGACTTACTTAAACACATCTGCACT	171	39	tGTCCCAAAGCTAAATCCATACTTACTACTGAGCAGTGGCTAGCTGAGGATGATTCATTCTTCTCTGGTAGCAGCAATAGCGATTTCATACTTTCATCATCTGTATAATCGACAGGCCGCAGACCAAATATATTACTGGTAAAATAAGTGCAGATGTGTTTAAGTAAGTCA	One primer sits in the repeat region
BARD1	BARD1_11	chr2	215632133	215632331	ACACTGACGACATGGTTCTACATCTGCTTTATCACACACCTTGA	TACGGTAGCAGAGACTTGGTCTCCAGCATAAGGCATTGGTGAAC	199	41	TCTGCTTTATCACACACCTTGATTCAAGAATATAGGTCCATTTTAAAAATAATTTTTACGTTGAACTACTTACACAGCATTTCTGGAGGCTCCATAGGAAAGTAACAGCTTGACTATATCCACATGCCCATTCTTGGCTGCATCGTGAAGTGGTGAGTCATTTTGATACCCGGTGGTGTTCACCAATGCCTTATGCTGG
BARD1	BARD1_12	chr2	215632194	215632366	ACACTGACGACATGGTTCTACATGAACTACTTACACAGCATTTCTGGA	TACGGTAGCAGAGACTTGGTCTAATCATGGGCACCTGAAGGTAGT	173	46	TGAACTACTTACACAGCATTTCTGGAGGCTCCATAGGAAAGTAACAGCTTGACTATATCCACATGCCCATTCTTGGCTGCATCGTGAAGTGGTGAGTCATTTTGATACCCGGTGGTGTTCACCAATGCCTTATGCTGGAGCAATAATTCCACTACCTTCAGGTGCCCATGATT
BARD1	BARD1_13	chr2	215632290	215632482	ACACTGACGACATGGTTCTACATCATTTTGATACCCGGTGGTGTT	TACGGTAGCAGAGACTTGGTCTACTGCCTGACGTTTACATTTATTTT	193	35	TCATTTTGATACCCGGTGGTGTTCACCAATGCCTTATGCTGGAGCAATAATTCCACTACCTTCAGGTGCCCATGATTGCAAGCTTCATGCTAATTAAATTTTTTGAAAAAGAAGTGAAAGAAGTGATAAGAAAGAGCAATGGATGATATTATAATATCACACTTTAGAAAAATAAATGTAAACGTCAGGCAGT
BARD1	BARD1_14	chr2	215633855	215634041	ACACTGACGACATGGTTCTACAAGAGTATATGTGGCAGAGGATGA	TACGGTAGCAGAGACTTGGTCTTCTAGGGCGACATACCTTCTGTT	187	35	AGAGTATATGTGGCAGAGGATGATATATAGACAACTACATAACTATAAACTATAAGAACTGTAAAACACAGAAAGAATGAGAATAAAAACCAGACAACTACCAATGGTGTCCATCCAGCATGGTCTTTAACATTTGGATCACTTCCATTTTGTAAAAGGTATTCAACAGAAGGTATGTCGCCCTAGA
BARD1	BARD1_15	chr2	215633969	215634165	ACACTGACGACATGGTTCTACACCAGCATGGTCTTTAACATTTGGA	TACGGTAGCAGAGACTTGGTCTTGAACAGTAGCCTTAAGAGAAAACGA	197	32	CCAGCATGGTCTTTAACATTTGGATCACTTCCATTTTGTAAAAGGTATTCAACAGAAGGTATGTCGCCCTAGAAAAATGAACAAAACGGAAATTAAAAAGCATTAAGGAAAGAAAGGAAAATATTGAGCTTTTTTAAATGCTGCCTTCTTCAATATAAAGTAAAACTTAAATCGTTTTCTCTTAAGGCTACTGTTCA
BARD1	BARD1_16	chr2	215645226	215645397	ACACTGACGACATGGTTCTACAAGAAATTGCTTTATAGTTGGCCTCA	TACGGTAGCAGAGACTTGGTCTAGTTCAAGTTACAGGCGAGTGAT	172	41	AGAAATTGCTTTATAGTTGGCCTCATTCTGAGATGGTATTTCAGAGTAAGCATCCTACCTTAATAGAAGCAATATGGAGCAAAGTCTCTCCTCTATGATTTCTTTTCACAGCCATATTGGGCAACAGCTTCATTGCTGAGGGACTAGACATCACTCGCCTGTAACTTGAACT
BARD1	BARD1_17	chr2	215645300	215645498	ACACTGACGACATGGTTCTACATGGAGCAAAGTCTCTCCTCTATGA	TACGGTAGCAGAGACTTGGTCTCATGCAAACGTAAAGTTGGTGGT	199	43	TGGAGCAAAGTCTCTCCTCTATGATTTCTTTTCACAGCCATATTGGGCAACAGCTTCATTGCTGAGGGACTAGACATCACTCGCCTGTAACTTGAACTACTTAATGTAGAAGGTGGTGTACCTGGTGAAAGACTAATGAATTCATCGGACATGTTACTGTTTTTCCTCCCTGATGTACCACCAACTTTACGTTTGCATG
BARD1	BARD1_18	chr2	215645412	215645592	ACACTGACGACATGGTTCTACAGTGGTGTACCTGGTGAAAGACTA	TACGGTAGCAGAGACTTGGTCTTGTAGAACCAGCATTCTGAGCAC	181	43	GTGGTGTACCTGGTGAAAGACTAATGAATTCATCGGACATGTTACTGTTTTTCCTCCCTGATGTACCACCAACTTTACGTTTGCATGAAGGTGGTGAAGAACATTCAGGCAATGGTATATTTTCTGAGGGCACCGTTTGCTTAACAAAATCTCCACTGGTGCTCAGAATGCTGGTTCTACA
BARD1	BARD1_19	chr2	215645465	215645636	ACACTGACGACATGGTTCTACACTCCCTGATGTACCACCAACTTT	TACGGTAGCAGAGACTTGGTCTAACGTGGCCATCACAATAGACTT	172	44	CTCCCTGATGTACCACCAACTTTACGTTTGCATGAAGGTGGTGAAGAACATTCAGGCAATGGTATATTTTCTGAGGGCACCGTTTGCTTAACAAAATCTCCACTGGTGCTCAGAATGCTGGTTCTACATCTCTTAGAAATGGGACTGGAAAGTCTATTGTGATGGCCACGTT
BARD1	BARD1_20	chr2	215645567	215645737	ACACTGACGACATGGTTCTACACTGGTGCTCAGAATGCTGGTTC	TACGGTAGCAGAGACTTGGTCTGTCTCCAGACACTAAGAGCAGGAAT	171	40	CTGGTGCTCAGAATGCTGGTTCTACATCTCTTAGAAATGGGACTGGAAAGTCTATTGTGATGGCCACGTTTTCCATTATTTTCTAATGGCAAAGATTTCTTAGATGTAAGATAATTTTTGCAGACCTTCTCAGGAGTCACTACTTCATTCCTGCTCTTAGTGTCTGGAGAC
BARD1	BARD1_21	chr2	215645595	215645782	ACACTGACGACATGGTTCTACATCTTAGAAATGGGACTGGAAAGTCTA	TACGGTAGCAGAGACTTGGTCTTGGAAGTTTAACTGAAGTCTCTTTACCA	188	38	TCTTAGAAATGGGACTGGAAAGTCTATTGTGATGGCCACGTTTTCCATTATTTTCTAATGGCAAAGATTTCTTAGATGTAAGATAATTTTTGCAGACCTTCTCAGGAGTCACTACTTCATTCCTGCTCTTAGTGTCTGGAGACTCTATTTGCTCAGCCAATGGTAAAGAGACTTCAGTTAAACTTCCA
BARD1	BARD1_22	chr2	215645690	215645867	ACACTGACGACATGGTTCTACAACCTTCTCAGGAGTCACTACTTCAT	TACGGTAGCAGAGACTTGGTCTGCCAACCATCTGTTATCTCCAGT	178	42	ACCTTCTCAGGAGTCACTACTTCATTCCTGCTCTTAGTGTCTGGAGACTCTATTTGCTCAGCCAATGGTAAAGAGACTTCAGTTAAACTTCCAAAACATTCAGATTCTGTCAAGGAGCCACTTGCTAGTAAGTCTATTTCACCATTTATCTGAGGACTGGAGATAACAGATGGTTGGC
BARD1	BARD1_23	chr2	215645779	215645954	ACACTGACGACATGGTTCTACATCCAAAACATTCAGATTCTGTCAAGG	TACGGTAGCAGAGACTTGGTCTACCAAAAATGGAATTTAGAGGCAGA	176	39	TCCAAAACATTCAGATTCTGTCAAGGAGCCACTTGCTAGTAAGTCTATTTCACCATTTATCTGAGGACTGGAGATAACAGATGGTTGGCTACAGAAGGATACCAGCTTTTGCTTAGATTCCTCTTTGGAGTCAAATTCACCATCTTCTTTTTCTGCCTCTAAATTCCATTTTTGGT
BARD1	BARD1_24	chr2	215645848	215646044	ACACTGACGACATGGTTCTACAGGAGATAACAGATGGTTGGCTACA	TACGGTAGCAGAGACTTGGTCTCAAGTCCTCCTGCAGATGTTTCT	197	39	GGAGATAACAGATGGTTGGCTACAGAAGGATACCAGCTTTTGCTTAGATTCCTCTTTGGAGTCAAATTCACCATCTTCTTTTTCTGCCTCTAAATTCCATTTTTGGTTGATTTCAGCTAAAGTTTTCTTTTTTTGCTTTTTTCCAGATCTTGCAGAAGCCTTTTTAGCCCTCTCAGAAACATCTGCAGGAGGACTTG
BARD1	BARD1_25	chr2	215645994	215646186	ACACTGACGACATGGTTCTACAATCTTGCAGAAGCCTTTTTAGCC	TACGGTAGCAGAGACTTGGTCTAACAAGAAGAATTCAATTAAAATGTGGTTTA	193	40	ATCTTGCAGAAGCCTTTTTAGCCCTCTCAGAAACATCTGCAGGAGGACTTGGGGAAACAAATTCATATGAGTCTTGCTGAGCACTTGCATCTTTTTTTATTGCAGGCTGGGTTTGCACTGAAGCTTTACTCACAACATATCTGACTTTCTTACTTCGAGGGCTAAACCACATTTTAATTGAATTCTTCTTGTT
BARD1	BARD1_26	chr2	215646094	215646292	ACACTGACGACATGGTTCTACATGCAGGCTGGGTTTGC	TACGGTAGCAGAGACTTGGTCTgcTCCATGTGGGAGCAATAAAT	199	35	TGCAGGCTGGGTTTGCACTGAAGCTTTACTCACAACATATCTGACTTTCTTACTTCGAGGGCTAAACCACATTTTAATTGAATTCTTCTTGTTTCCTGCATCATTAAACAAACTTTTCCTAGGTTTATCTTCTTTCAAATCTGACAGAAAAAAAGAAAAAGAAATCTGTTACATGAAATTTATTGCTCCCACATGGAgc	One primer sits in the repeat region
BARD1	BARD1_27	chr2	215656921	215657092	ACACTGACGACATGGTTCTACAATTCCAGAACTCCAGATAGATGTTT	TACGGTAGCAGAGACTTGGTCTATAGACAACTGGACAGCATGATT	172	33	ATTCCAGAACTCCAGATAGATGTTTTATATACTTTATGAATATGAATTCATCAGTTTTTAACTGATGAATTTAACTAAGAGAGATAGGGATAGTTCTTACCTGACAGCTCATTGTCATGTAGCAAATTTCGAAGCTTACTACAAAGTTGAATCATGCTGTCCAGTTGTCTAT
BARD1	BARD1_28	chr2	215657033	215657215	ACACTGACGACATGGTTCTACATGTCATGTAGCAAATTTCGAAGC	TACGGTAGCAGAGACTTGGTCTTCTGCTGAATGGGTTGCTTTTTT	183	36	TGTCATGTAGCAAATTTCGAAGCTTACTACAAAGTTGAATCATGCTGTCCAGTTGTCTATTTATCTTCAAGTCTTGTATCCAGGCCGGGGTGTAACACACTGGACATCCAGTTCCAATGCAGTCACTTACACAATTACtttaaaataattaaaaaaaaaaaaaaaaGCAACCCATTCAGCAGA	One primer sits in the repeat region
BARD1	BARD1_29	chr2	215661681	215661861	ACACTGACGACATGGTTCTACAAAAGTTACACAAACATCAAGTACCATT	TACGGTAGCAGAGACTTGGTCTGTTTTAATTTCTTCAAACAGTACTAACATTCT	181	31	aaagttacacaaacatcaagtaccattattatCAACAAGATTACATGATTGTTATCTAGTAAAAAATACAGTTGTACTATATACATCAAACCGTAATTACTTACCTACAGAAGATGTGCTCACATCCTCCTAAACACACAGGCTCTCTCAGAATGTTAGTACTGTTTGAAGAAATTAAAAC	One primer sits in the repeat region
BARD1	BARD1_30	chr2	215661797	215661971	ACACTGACGACATGGTTCTACATGCTCACATCCTCCTAAACACAC	TACGGTAGCAGAGACTTGGTCTTGCATCCTTAATACCTTCTGCTT	175	37	TGCTCACATCCTCCTAAACACACAGGCTCTCTCAGAATGTTAGTACTGTTTGAAGAAATTAAAACAATCAAGATTTGAGTCATTGTTAGATAAACATCTCACACCCAATATTTCATCCAAGGCCCAACACTACCATATTTCTCACTTTCTCAAAGCAGAAGGTATTAAGGATGCA
BARD1	BARD1_31	chr2	215674071	215674250	ACACTGACGACATGGTTCTACACTGCCGCCCCCAGAAAC	TACGGTAGCAGAGACTTGGTCTGCTCCGGGAACGAGCC	180	71	CTGCCGCCCCCAGAAACTGTGCGACCCGTGCCCTCGCAGCCACCCCCAAGAAGCTCCGTCTTTACCAACGCGAGCAGCGCAGCAGCTTCTCCAGGCGGTCGAGCGCGGCGCGACTGTGGGCCCAGGCACCGCGACCATCCGGTTCCATGGCGGGCGCGGAACGAGGCTCGTTCCCGGAGC
BARD1	BARD1_32	chr2	215674127	215674321	ACACTGACGACATGGTTCTACACGTCTTTACCAACGCGAGCAG	TACGGTAGCAGAGACTTGGTCTGAGGAGCCTTTCATCCGAAGG	195	69	CGTCTTTACCAACGCGAGCAGCGCAGCAGCTTCTCCAGGCGGTCGAGCGCGGCGCGACTGTGGGCCCAGGCACCGCGACCATCCGGTTCCATGGCGGGCGCGGAACGAGGCTCGTTCCCGGAGCGGATCCTCGGCTGCCGGTTCCTCGGCTGCCGATTATCCGGCATCGTCCCGCCTTCGGATGAAAGGCTCCTC
BRCA1	BRCA1_3_UTR__exon_24__1	chr17	41196256	41196454	ACACTGACGACATGGTTCTACAgtgaAAAGGCTCTGAGAAAGTCG	TACGGTAGCAGAGACTTGGTCTGGACTGTTTATAGCTGTTGGAAGGA	199	45	gtgaAAAGGCTCTGAGAAAGTCGGCTGGCCTAAGTCTCAAGAACAGTCATTCATGGTGGAAGTGTTTGCTACCAAGTTTATTTGCAGTGTTAACAGCACAACATTTACAAAACGTATTTTGTACAATCAAGTCTTCACTGCCCTTGCACACTGGGGGGGCTAGGGAAGACCTAGTCCTTCCAACAGCTATAAACAGTCC	One primer sits in the repeat region
BRCA1	BRCA1_3_UTR__exon_24__2	chr17	41196303	41196500	ACACTGACGACATGGTTCTACACATTCATGGTGGAAGTGTTTGCT	TACGGTAGCAGAGACTTGGTCTTGCTTGCTGAAGGAAGAAAAAGTG	198	41	CATTCATGGTGGAAGTGTTTGCTACCAAGTTTATTTGCAGTGTTAACAGCACAACATTTACAAAACGTATTTTGTACAATCAAGTCTTCACTGCCCTTGCACACTGGGGGGGCTAGGGAAGACCTAGTCCTTCCAACAGCTATAAACAGTCCTGGATAATGGGTTTATGAAAAACACTTTTTCTTCCTTCAGCAAGCA
BRCA1	BRCA1_3UTRB_3	chr17	41196422	41196600	ACACTGACGACATGGTTCTACAAGACCTAGTCCTTCCAACAGCTA	TACGGTAGCAGAGACTTGGTCTAAATGACAGATCCCACCAGGAAG	179	39	AGACCTAGTCCTTCCAACAGCTATAAACAGTCCTGGATAATGGGTTTATGAAAAACACTTTTTCTTCCTTCAGCAAGCAAAATTATTTATGAAGCTGTATGGTTTCAGCAACAGGGAGCAAAGGAAAAAAATCACCTCAAAGAAAGCAACAGCTTCCTTCCTGGTGGGATCTGTCATTT
BRCA1	BRCA1_3UTRB_4	chr17	41196516	41196686	ACACTGACGACATGGTTCTACACTGTATGGTTTCAGCAACAGGGA	TACGGTAGCAGAGACTTGGTCTAGTAAAATGTTTATTGTTGTAGCTCTGG	171	36	CTGTATGGTTTCAGCAACAGGGAGCAAAGGAAAAAAATCACCTCAAAGAAAGCAACAGCTTCCTTCCTGGTGGGATCTGTCATTTTATAGATATGAAATATTCATGCCAGAGGTCTTATATTTTAAGAGGAATGGATTATATACCAGAGCTACAACAATAAACATTTTACT
BRCA1	BRCA1_3_UTR__exon_24__5	chr17	41196609	41196779	ACACTGACGACATGGTTCTACATGAAATATTCATGCCAGAGGTCTT	TACGGTAGCAGAGACTTGGTCTTTTGCTAGATTTCTAAAGAATGTGTTCTAA	171	31	TGAAATATTCATGCCAGAGGTCTTATATTTTAAGAGGAATGGATTATATACCAGAGCTACAACAATAAACATTTTACTTATTACTAATGAGGAATTAGAAGACTGTCTTTGGAAACCGGTTCTTGAAAATCTTCTGCTGTTTTAGAACACATTCTTTAGAAATCTAGCAAA
BRCA1	BRCA1_3_UTR__exon_24__6	chr17	41196796	41196982	ACACTGACGACATGGTTCTACAAGAAATCTCTTCTAGTTTCATTTTCCTTT	TACGGTAGCAGAGACTTGGTCTCGGTCATGGTGGTGGACA	187	49	AGAAATCTCTTCTAGtttcattttcctttttttttttttttttttgagccacagtctcactgtcacccaggctggagtgccgtggtatgatcttggctcactgcaacctccacctcccgggctgaagtgattctcctgccttagccacctgagtagctgggattacaggtgtccaccaccatgaccg	Two primers sits in the repeat region
BRCA1	BRCA1_3_UTR__exon_24__7	chr17	41196962	41197133	ACACTGACGACATGGTTCTACAAGGTGTCCACCACCATGA	TACGGTAGCAGAGACTTGGTCTAAGGAAACTTGAAACCTGGGCAT	172	52	aggtgtccaccaccatgaccggctaatttctgtatttttagtagagatggggtttcaccatgttggccaggctggtttcgaactcctgacctccagtgatctgcccaccttggcctcccaaagtgctgggattacaggcgtgagccaccatgcccagGTTTCAAGTTTCCTT	Two primers sits in the repeat region
BRCA1	BRCA1_3_UTR__exon_24__8	chr17	41197109	41197273	ACACTGACGACATGGTTCTACAccatgcccagGTTTCAAGTTT	TACGGTAGCAGAGACTTGGTCTGCAGAGAGTCAGACCCTTCAAT	165	45	ccatgcccagGTTTCAAGTTTCCTTTTCATTTCTAATACCTGCCTCAGAATTTCCTCCCCAATGTTCCACTCCAACATTTGAGAACTGCCCAAGGACTATTCTGACTTTAAGTCACATAATCGATCCCAAGCACTCTCCTTCCATTGAAGGGTCTGACTCTCTGC	One primer sits in the repeat region
BRCA1	BRCA1_3_UTR__exon_24__9	chr17	41197192	41197381	ACACTGACGACATGGTTCTACAAACTGCCCAAGGACTATTCTGAC	TACGGTAGCAGAGACTTGGTCTTCTATTCAGGCTGTTGTTGGCTT	190	46	AACTGCCCAAGGACTATTCTGACTTTAAGTCACATAATCGATCCCAAGCACTCTCCTTCCATTGAAGGGTCTGACTCTCTGCCTTTGTGAACACAGGGTTTTAGAGAAGTAAACTTAGGGAAACCAGCTATTCTCTTGAGGCCAAGCCACTCTGTGCTTCCAGCCCTAAGCCAACAACAGCCTGAATAGA
BRCA1	BRCA1_3_UTR__exon_24__10	chr17	41197309	41197497	ACACTGACGACATGGTTCTACAGGGAAACCAGCTATTCTCTTGAGG	TACGGTAGCAGAGACTTGGTCTGGAAATCTGCCATGAGCACAAAA	189	41	GGGAAACCAGCTATTCTCTTGAGGCCAAGCCACTCTGTGCTTCCAGCCCTAAGCCAACAACAGCCTGAATAGAAAGAATAGGGCTGATAAATAATGAATCAGCATCTTGCTCAATTGGTGGCGTTTAAATGGTTTTAAAATCTTCTCAGGTGAAAAATTACCATAATTTTGTGCTCATGGCAGATTTCC
BRCA1	BRCA1_3_UTR__exon_24__11	chr17	41197360	41197558	ACACTGACGACATGGTTCTACAAGCCAACAACAGCCTGAATAGAA	TACGGTAGCAGAGACTTGGTCTCTGAAAAGGACTTCTGGCTATGC	199	39	AGCCAACAACAGCCTGAATAGAAAGAATAGGGCTGATAAATAATGAATCAGCATCTTGCTCAATTGGTGGCGTTTAAATGGTTTTAAAATCTTCTCAGGTGAAAAATTACCATAATTTTGTGCTCATGGCAGATTTCCAAGGGAGACTTCAAGCAGAAAATCTTTAAGGGACCCTTGCATAGCCAGAAGTCCTTTTCAG
BRCA1	BRCA1_3_UTR__exon_24__12	chr17	41197488	41197682	ACACTGACGACATGGTTCTACAGCAGATTTCCAAGGGAGACTTCA	TACGGTAGCAGAGACTTGGTCTACAGGTACAGAGCCACAGGA	195	48	GCAGATTTCCAAGGGAGACTTCAAGCAGAAAATCTTTAAGGGACCCTTGCATAGCCAGAAGTCCTTTTCAGGCTGATGTACATAAAATATTTAGTAGCCAGGACAGTAGAAGGACTGAAGAGTGAGAGGAGCTCCCAGGGCCTGGAAAGGCCACTTTGTAAGCTCATTCTTGGGGTCCTGTGGCTCTGTACCTGT
BRCA1	BRCA1_3UTRA_3	chr17	41197582	41197779	ACACTGACGACATGGTTCTACATAGCCAGGACAGTAGAAGGACTG	TACGGTAGCAGAGACTTGGTCTGTGGGTGTTGGACAGTGTAGC	198	57	TAGCCAGGACAGTAGAAGGACTGAAGAGTGAGAGGAGCTCCCAGGGCCTGGAAAGGCCACTTTGTAAGCTCATTCTTGGGGTCCTGTGGCTCTGTACCTGTGGCTGGCTGCAGTCAGTAGTGGCTGTGGGGGATCTGGGGTATCAGGTAGGTGTCCAGCTCCTGGCACTGGTAGAGTGCTACACTGTCCAACACCCAC	Assays designed by relax mode and have no off-target hits
BRCA1	BRCA1_1	chr17	41197714	41197895	ACACTGACGACATGGTTCTACAATCTGGGGTATCAGGTAGGTGTC	TACGGTAGCAGAGACTTGGTCTCCTGGAGTCGATTGATTAGAGCC	182	52	ATCTGGGGTATCAGGTAGGTGTCCAGCTCCTGGCACTGGTAGAGTGCTACACTGTCCAACACCCACTCTCGGGTCACCACAGGTGCCTCACACATCTGCCCAATTGCTGGAGACAGAGAACACAAGCAGAGATTAGTGTCAATTCATTCTCCTGGACTAGGCTCTAATCAATCGACTCCAGG	Assays designed by relax mode and have no off-target hits
BRCA1	BRCA1_2	chr17	41199563	41199750	ACACTGACGACATGGTTCTACATGCCAAGAACTGTGCTACTCAAG	TACGGTAGCAGAGACTTGGTCTTTGAATGCTCTTTCCTTCCTGGG	188	51	tgccaagaactgtgctactcaagcaccaggtaatgagtgataaaccaaacccatgcaaaagGACCCCATATAGCACAGGTACATGCAGGCACCTTACCATGGAAGCCATTGTCCTCTGTCCAGGCATCTGGCTGCACAACCACAATTGGGTGGACACCCTGGATCCCCAGGAAGGAAAGAGCATTCAA	One primer sits in the repeat region
BRCA1	BRCA1_3	chr17	41201071	41201269	ACACTGACGACATGGTTCTACAGGTGCCAGTCTTGCTCACAG	TACGGTAGCAGAGACTTGGTCTGGCCTGGGTTAAGTATGCAGAT	199	47	GGTGCCAGTCTTGCTCACAGGAGAGAATATTGTGTCCTCCCTCTCTGACAGGGCACCCAATACTTACTGTGCCAAGGGTGAATGATGAAAGCTCCTTCACCACAGAAGCACCACACAGCTGTACCATCCATTCCAGTTGATCTAAAATGGACATTTAGATGTAAAATCACTGCAGTAATCTGCATACTTAACCCAGGCC
BRCA1	BRCA1_4	chr17	41202996	41203184	ACACTGACGACATGGTTCTACACCCATCGTGGGATCTTGCTTAT	TACGGTAGCAGAGACTTGGTCTTTTTCCTTCTCTCCATTCCCCTG	189	51	CCCATCGTGGGATCTTGCTTATAATACTCCACTATGTAAGACAAAGGCTGGTGCTGGAACTCTGGGGTTCTCCCAGGCTCTTACCTGTGGGCATGTTGGTGAAGGGCCCATAGCAACAGATTTCTAGCCCCCTGAAGATCTGGAAGAAGAGAGGAAGAGAGAGGGACAGGGGAATGGAGAGAAGGAAAA
BRCA1	BRCA1_5	chr17	41208999	41209195	ACACTGACGACATGGTTCTACACTCTGCAAAGGGGAGTGGAATAC	TACGGTAGCAGAGACTTGGTCTTCTCTTTCTCTTATCCTGATGGGT	197	46	CTCTGCAAAGGGGAGTGGAATACAGAGTGGTGGGGTGAGATTTTTGTCAACTTGAGGGAGGGAGCTTTACCTTTCTGTCCTGGGATTCTCTTGCTCGCTTTGGACCTTGGTGGTTTCTTCCATTGACCACATCTCCTCTGACTTCAAAATCATGCTGAAAGAAACCAAACACAACCCATCAGGATAAGAGAAAGAGA
BRCA1	BRCA1_6	chr17	41215258	41215442	ACACTGACGACATGGTTCTACAGAAAGTGGTGCATTGATGGAAGG	TACGGTAGCAGAGACTTGGTCTAAGAGCACGTTCTTCTGCTGTAT	185	36	GAAAGTGGTGCATTGATGGAAGGAAGCAAATACATTTTTAACTATATGACTGAATGAATATCTCTGGTTAGTTTGTAACATCAAGTACTTACCTCATTCAGCATTTTTCTTTCTTTAATAGACTGGGTCACCCCTAAAGAGATCATAGAAAAGACAGGTTACATACAGCAGAAGAACGTGCTCTT
BRCA1	BRCA1_7	chr17	41215830	41216019	ACACTGACGACATGGTTCTACAGGTGTAAAAATGCAATTCTGAGGTGT	TACGGTAGCAGAGACTTGGTCTTCCTGATTTTGTTTTCAACTTCTAATCC	190	37	GGTGTAAAAATGCAATTCTGAGGTGTTAAAGGGAGGAGGGGAGAAATAGTATTATACTTACAGAAATAGCTAACTACCCATTTTCCTCCCGCAATTCCTAGAAAATATTTCAGTGTCCGTTCACACACAAACTCAGCATCTGCAGAATGAAAAACACTCAAAGGATTAGAAGTTGAAAACAAAATCAGGA
BRCA1	BRCA1_8	chr17	41219582	41219777	ACACTGACGACATGGTTCTACATATGCAGCAGATGCAAGGTATTC	TACGGTAGCAGAGACTTGGTCTAACTAGTATTCTGAGCTGTGTGC	196	35	TATGCAGCAGATGCAAGGTATTCTGTAAAGGTTCTTGGTATACCTGTTTTCATAACAACATGAGTAGTCTCTTCAGTAATTAGATTAGTTAAAGTGATGTGGTGTTTTCTGGCAAACTTGTACACGAGCATCTGAAATTAAATCAAATATTCCATTATCATGAGTTACCTCTAGCACACAGCTCAGAATACTAGTT
BRCA1	BRCA1_Intron_16_1	chr17	41220845	41221039	ACACTGACGACATGGTTCTACACGTAAGAAGGCTTAGAAGGGGTTC	TACGGTAGCAGAGACTTGGTCTTGGCTAGTAAATGATGGCCCTTG	195	37	CGTAAGAAGGCTTAGAAGGGGTTCATGTTCTTCCCCAAAGAAATTTAGAGTCCTCTAGCTATTATCTATCAACCAAATAAAAATCAATAGGCAGCAAAAGAAATTAACCAGATCAATTATGGGCACAGTTGACCTAGCTGGTAGGTATTGTCTGATAAATAACTTTGTTTACCAAGGGCCATCATTTACTAGCCA
BRCA1	BRCA1_Intron_16_2	chr17	41220960	41221131	ACACTGACGACATGGTTCTACAATTATGGGCACAGTTGACCTAGC	TACGGTAGCAGAGACTTGGTCTAGTATGGAGTGAGGCAACATGAA	172	44	ATTATGGGCACAGTTGACCTAGCTGGTAGGTATTGTCTGATAAATAACTTTGTTTACCAAGGGCCATCATTTACTAGCCATAGCCACAGCCACTCACACCAGTATTTACGTGTTGCACAATACTGCCATGAAGGTCAGGCCATCTTTCTTTCATGTTGCCTCACTCCATACT
BRCA1	BRCA1_Intron_16_3	chr17	41221006	41221202	ACACTGACGACATGGTTCTACAACTTTGTTTACCAAGGGCCATCA	TACGGTAGCAGAGACTTGGTCTCGGAGGGTGGTAGCAAAAGG	197	49	ACTTTGTTTACCAAGGGCCATCATTTACTAGCCATAGCCACAGCCACTCACACCAGTATTTACGTGTTGCACAATACTGCCATGAAGGTCAGGCCATCTTTCTTTCATGTTGCCTCACTCCATACTGCCACAGGGCACTGAAAAAAGGCAGGCTAGAGAAGCTAATGACATCCTCCCCCTTTTGCTACCACCCTCCG
BRCA1	BRCA1_Intron_16_4	chr17	41221097	41221291	ACACTGACGACATGGTTCTACAGGCCATCTTTCTTTCATGTTGCC	TACGGTAGCAGAGACTTGGTCTTTCAGCAGTTCAGCATTGCTCTT	195	47	GGCCATCTTTCTTTCATGTTGCCTCACTCCATACTGCCACAGGGCACTGAAAAAAGGCAGGCTAGAGAAGCTAATGACATCCTCCCCCTTTTGCTACCACCCTCCGCCAGGATCATTAGCAATTCTGAACTGATTAATTGCTGAAATCCCAGCCTTGAAACTGTTCAGTTAGAAGAGCAATGCTGAACTGCTGAA
BRCA1	BRCA1_9	chr17	41222884	41223082	ACACTGACGACATGGTTCTACAAACTCTTTCCAGAATGTTGTTAAGTC	TACGGTAGCAGAGACTTGGTCTGCTCATACTACTGATACTGCTGGG	199	43	AACTCTTTCCAGAATGTTGTTAAGTCTTAGTCATTAGGGAGATACATATGGATACACTCACAAATTCTTCTGGGGTCAGGCCAGACACCACCATGGACATTCTTTTGTTGACCCTTTCTGTTGAAGCTGTCAATTCTGGCTTCTCCCTGCTCACACTTTCTTCCATTGCATTATACCCAGCAGTATCAGTAGTATGAGC	Assays designed by relax mode and have no off-target hits
BRCA1	BRCA1_10	chr17	41222991	41223181	ACACTGACGACATGGTTCTACATTGACCCTTTCTGTTGAAGCTGT	TACGGTAGCAGAGACTTGGTCTGCCCCAGAGTCAGCTCGT	191	48	TTGACCCTTTCTGTTGAAGCTGTCAATTCTGGCTTCTCCCTGCTCACACTTTCTTCCATTGCATTATACCCAGCAGTATCAGTAGTATGAGCAGCAGCTGGACTCTGGGCAGATTCTGCAACTTTCAATTGGGGAACTTTCAATGCAGAGGTTGAAGATGGTATGTTGCCAACACGAGCTGACTCTGGGGC	Assays designed by relax mode and have no off-target hits
BRCA1	BRCA1_11	chr17	41223105	41223287	ACACTGACGACATGGTTCTACATCTGCAACTTTCAATTGGGGAAC	TACGGTAGCAGAGACTTGGTCTTGTGTAAATTAAACTTCTCCCATTCCT	183	46	TCTGCAACTTTCAATTGGGGAACTTTCAATGCAGAGGTTGAAGATGGTATGTTGCCAACACGAGCTGACTCTGGGGCTCTGTCTTCAGAAGGATCAGATTCAGGGTCATCAGAGAAGAGGCTGATTCCAGATTCCAGGTAAGGGGTTCCCTCTGAAAGGAATGGGAGAAGTTTAATTTACACA	Assays designed by relax mode and have no off-target hits
BRCA1	BRCA1_12	chr17	41226290	41226486	ACACTGACGACATGGTTCTACAATGTAGGATTCAGAGTAAAATCAAAGTG	TACGGTAGCAGAGACTTGGTCTTGCTCTGGGAGTCTTCAGAATAGA	197	43	ATGTAGGATTCAGAGTAAAATCAAAGTGTTTGTTCCAATACAGCAGATGAAATATTACCTAGATCTTGCCTTGGCAAGTAAGATGTTTCCGTCAAATCGTGTGGCCCAGACTCTTCCAGCTGTTGCTCCTCCACATCAACAACCTTAATGAGCTCCTCTTGAGATGGGTAGTTTCTATTCTGAAGACTCCCAGAGCA	Assays designed by relax mode and have no off-target hits
BRCA1	BRCA1_13	chr17	41226396	41226580	ACACTGACGACATGGTTCTACACAGACTCTTCCAGCTGTTGCT	TACGGTAGCAGAGACTTGGTCTCAATTGGTGGCGATGGTTTTCTC	185	45	CAGACTCTTCCAGCTGTTGCTCCTCCACATCAACAACCTTAATGAGCTCCTCTTGAGATGGGTAGTTTCTATTCTGAAGACTCCCAGAGCAACTGTGCATGTACCACCTATCATCTAATGATGGGCATTTAGAAGGGGATGACCTAGAAAGATAAATGGAAGGAGAAAACCATCGCCACCAATTG	Assays designed by relax mode and have no off-target hits
BRCA1	BRCA1_14	chr17	41228395	41228576	ACACTGACGACATGGTTCTACATGCCTGTATGCAAAAAACTGGAG	TACGGTAGCAGAGACTTGGTCTCCTTTCTGCTGACAAGTTTGAGG	182	35	TGCCTGTATGCAAAAAACTGGAGAAAGTATGGTGAAAAAAATTAACAATCAGAGTTCAATATAAATAAAGATGTCAGATACCACAGCATCTTTACATTGATGTTTCTTACCTTTCCACTCCTGGTTCTTTATTTTTACTGGTAGAACTATCTGCAGACACCTCAAACTTGTCAGCAGAAAGG
BRCA1	BRCA1_15	chr17	41228496	41228684	ACACTGACGACATGGTTCTACAGTTTCTTACCTTTCCACTCCTGGT	TACGGTAGCAGAGACTTGGTCTTCACTATCAGAACAAAGCAGTAAAGT	189	37	GTTTCTTACCTTTCCACTCCTGGTTCTTTATTTTTACTGGTAGAACTATCTGCAGACACCTCAAACTTGTCAGCAGAAAGGCCTTCTGGATTCTGGCTTATAGGGTATTCACTACTTTTCTGTGAAGTTAATACTGCTTTAAATGGAATGAGAAAACAAATCTACTTTACTGCTTTGTTCTGATAGTGA	Assays designed by relax mode and have no off-target hits
BRCA1	BRCA1_16	chr17	41231286	41231459	ACACTGACGACATGGTTCTACAGCCAGAACCACCATCTTTCAGTA	TACGGTAGCAGAGACTTGGTCTAGTACCCGTTCCCTTGATGTCTA	174	42	GCCAGAACCACCATCTTTCAGTAATTTGCCAAAATGACGAACACAAAGGGAAAGAGGAGAGGCACCTGATATATGTTCTCTAGGCCTTTTAGAAAACATGGAGTTGTTCCTTTGGCCATGTATATGCGAATCTGTAAGAAAGGTGAAATTGTAGACATCAAGGGAACGGGTACT
BRCA1	BRCA1_Intron_13_1	chr17	41231398	41231595	ACACTGACGACATGGTTCTACATGGCCATGTATATGCGAATCTGT	TACGGTAGCAGAGACTTGGTCTTCAATACGCACATTAATTCTCTTGGC	198	43	TGGCCATGTATATGCGAATCTGTAAGAAAGGTGAAATTGTAGACATCAAGGGAACGGGTACTGTTCAAAAAGGAATGCCCCACAAGTGTTACCATGGCAAAACTGGAAAAGTCTACAACGTGACCCAGCATGCTGTTGGCATCGCTGTAAACAAGTTAAGGGCAAGATTCTTGCCAAGAGAATTAATGTGCGTATTGA
BRCA1	BRCA1_Intron_13_2	chr17	41231492	41231689	ACACTGACGACATGGTTCTACATGGCAAAACTGGAAAAGTCTACA	TACGGTAGCAGAGACTTGGTCTCCACGTACCTTTCTCTTTGGCTT	198	43	TGGCAAAACTGGAAAAGTCTACAACGTGACCCAGCATGCTGTTGGCATCGCTGTAAACAAGTTAAGGGCAAGATTCTTGCCAAGAGAATTAATGTGCGTATTGAGCACATTAAACACTCTAAGAGCCAAGACAGCTTCCTGAAACGCGTGAAGGAAAATGATCAGAAAAAGAAAGAAGCCAAAGAGAAAGGTACGTGG
BRCA1	BRCA1_Intron_13_3	chr17	41231596	41231778	ACACTGACGACATGGTTCTACAGCACATTAAACACTCTAAGAGCCAA	TACGGTAGCAGAGACTTGGTCTGGAATAGGTTCCAGCTGCTCA	183	48	GCACATTAAACACTCTAAGAGCCAAGACAGCTTCCTGAAACGCGTGAAGGAAAATGATCAGAAAAAGAAAGAAGCCAAAGAGAAAGGTACGTGGGTTCAACTGAAGCACCAGCCTGCTCCACCCAGAGAAGCACACTTTGTGAGAACCAATGGGAAGGAGCCTGAGCAGCTGGAACCTATTCC
BRCA1	BRCA1_Intron_13_4	chr17	41231671	41231869	ACACTGACGACATGGTTCTACACAAAGAGAAAGGTACGTGGGTTC	TACGGTAGCAGAGACTTGGTCTTGTTCTGGTGATAGAATGACTTTTCTT	199	41	CAAAGAGAAAGGTACGTGGGTTCAACTGAAGCACCAGCCTGCTCCACCCAGAGAAGCACACTTTGTGAGAACCAATGGGAAGGAGCCTGAGCAGCTGGAACCTATTCCCTATGAATTCATGGCATAATAGGTGTTAAAAAAAAAAAAAAAAGACCTTTGGACTGTAAAAAAAAAGAAAAGTCATTCTATCACCAGAACA
BRCA1	BRCA1_Intron_13_5	chr17	41231760	41231936	ACACTGACGACATGGTTCTACAAGCAGCTGGAACCTATTCCCTAT	TACGGTAGCAGAGACTTGGTCTACAAGTTATCTTATTTGCTTCATTGCAT	177	32	AGCAGCTGGAACCTATTCCCTATGAATTCATGGCATAATAGGTGTTAAAAAAAAAAAAAAAAGACCTTTGGACTGTAAAAAAAAAGAAAAGTCATTCTATCACCAGAACATTTAGCATATAAATTCCTCTTCTTACTACAATGGGCCTCATGCAATGAAGCAAATAAGATAACTTGT
BRCA1	BRCA1_Intron_13_6	chr17	41231851	41232048	ACACTGACGACATGGTTCTACATCATTCTATCACCAGAACATTTAGCA	TACGGTAGCAGAGACTTGGTCTCACAAGGCTTAGGTTGGGCTT	198	35	TCATTCTATCACCAGAACATTTAGCATATAAATTCCTCTTCTTACTACAATGGGCCTCATGCAATGAAGCAAATAAGATAACTTGTTAGAAGTTAACAACTCAATAGAACCTGAAAAACAGAGCAAAACCTTTCTGCTTTTTTTTCTCCTTAATCCTTAATTCATTCTCTGAACAGCAAGCCCAACCTAAGCCTTGTG
BRCA1	BRCA1_Intron_13_7	chr17	41231905	41232081	ACACTGACGACATGGTTCTACACCTCATGCAATGAAGCAAATAAGAT	TACGGTAGCAGAGACTTGGTCTTTCCTAAACCAGCCAGCAAGTAG	177	37	CCTCATGCAATGAAGCAAATAAGATAACTTGTTAGAAGTTAACAACTCAATAGAACCTGAAAAACAGAGCAAAACCTTTCTGCTTTTTTTTCTCCTTAATCCTTAATTCATTCTCTGAACAGCAAGCCCAACCTAAGCCTTGTGACATGATGATCTACTTGCTGGCTGGTTTAGGAA
BRCA1	BRCA1_Intron_13_8	chr17	41232004	41232201	ACACTGACGACATGGTTCTACATCCTTAATTCATTCTCTGAACAGCA	TACGGTAGCAGAGACTTGGTCTTGGCCCATACTTCCTATCCACAA	198	39	TCCTTAATTCATTCTCTGAACAGCAAGCCCAACCTAAGCCTTGTGACATGATGATCTACTTGCTGGCTGGTTTAGGAAAGTCTAAATGCAGAGATCCAGAGTCCAAGTTTCAGAATATTATTGTAGTTCCTCTTAAATCATTCCCTCATCTAGATGTCTTAACATGTTACATTCTTTGTGGATAGGAAGTATGGGCCA
BRCA1	BRCA1_17	chr17	41234313	41234511	ACACTGACGACATGGTTCTACAGAGCAAGGATCATAAAATGTTGGAG	TACGGTAGCAGAGACTTGGTCTAGCCAGCCTTCTAACAGCTAC	199	43	GAGCAAGGATCATAAAATGTTGGAGCTAGGTCCTTACTCTTCAGAAGGAGATAAAGGGGAAGGAAAGAATTTTGCTTAAGATATCAGTGTTTGGCCAACAATACACACCTTTTTCTGATGTGCTTTGTTCTGGATTTCGCAGGTCCTCAAGGGCAGAAGAGTCACTTATGATGGAAGGGTAGCTGTTAGAAGGCTGGCT
BRCA1	BRCA1_18	chr17	41234442	41234625	ACACTGACGACATGGTTCTACACTGGATTTCGCAGGTCCTCAAG	TACGGTAGCAGAGACTTGGTCTTCATTTTCTTGGTGCCATTTATCGT	184	46	CTGGATTTCGCAGGTCCTCAAGGGCAGAAGAGTCACTTATGATGGAAGGGTAGCTGTTAGAAGGCTGGCTCCCATGCTGTTCTAACACAGCTTCTAGTTCAGCCATTTCCTGCTGGAGCTTTATCAGGTTATGTTGCATGGTATCCCTCTGCTTCAAAAACGATAAATGGCACCAAGAAAATGA	Assays designed by relax mode and have no off-target hits
BRCA1	BRCA1_Intron_12__region_2__1	chr17	41236576	41236770	ACACTGACGACATGGTTCTACAACTCTCCGTTTCTTCTTCTGATCC	TACGGTAGCAGAGACTTGGTCTAATGGCATTGCTGCAGACCTT	195	40	ACTCTCCGTTTCTTCTTCTGATCCTTAAAAATGACTTTGCCCTTTACTAAAAACAAGCCATCTTCTTTCTCCTGCTACACTGAGTTCACAATTTTCAGGAGGTTTTTATGACCAGAAAATGTATTCCTAGCTTCACAAAGGTTTCTACTGCTACTCTAACACTGCTTTGCTGCCAAGGTCTGCAGCAATGCCATT
BRCA1	BRCA1_Intron_12__region_2__2	chr17	41236708	41236884	ACACTGACGACATGGTTCTACATCACAAAGGTTTCTACTGCTACTCT	TACGGTAGCAGAGACTTGGTCTCCTGTGAAGCATTTTGGTCAGAT	177	46	TCACAAAGGTTTCTACTGCTACTCTAACACTGCTTTGCTGCCAAGGTCTGCAGCAATGCCATTGCCACCACGTGGTACTCGTGAGTAGTTACATCACTGATCAAACCCTAGCCAAAGTCTTGCCTCAGTCAACCTGGAATGAAAGCACATAGATATCTGACCAAAATGCTTCACAGG
BRCA1	BRCA1_Intron_12__region_2__3	chr17	41236803	41236999	ACACTGACGACATGGTTCTACAACTGATCAAACCCTAGCCAAAGT	TACGGTAGCAGAGACTTGGTCTTTGGGAAACCCAAAGGAAAGTTA	197	40	ACTGATCAAACCCTAGCCAAAGTCTTGCCTCAGTCAACCTGGAATGAAAGCACATAGATATCTGACCAAAATGCTTCACAGGCTGTATTAGTCACTACTGTCACAACCATCACATCTAACCTCTACGTGGCCATTACATAAATCAGAAAAAGTAGTGGGGTAATTATTAATAGATAACTTTCCTTTGGGTTTCCCAA
BRCA1	BRCA1_Intron_12__region_1__1	chr17	41237464	41237643	ACACTGACGACATGGTTCTACATGCCATTAGGATAAAATTCCTCAACA	TACGGTAGCAGAGACTTGGTCTAAAAGAGGAGTGGCAGCAAGTAA	180	41	TGCCATTAGGATAAAATTCCTCAACATAGCATTCAAAAGGCCCTTTATACCCTGGTATTATCTCTCATTTCTCCCAACACCCCTCACACAAGTTGTTTTCCTATAACACATGACAACTTTACGTTTCCTGGGAATTCCATGACTCTGTACCTTTACCTTACTTGCTGCCACTCCTCTTTT
BRCA1	BRCA1_Intron_12__region_1__2	chr17	41237543	41237725	ACACTGACGACATGGTTCTACACCCCTCACACAAGTTGTTTTCCT	TACGGTAGCAGAGACTTGGTCTTCATATTTCACAACTCCTCCTGGT	183	42	CCCCTCACACAAGTTGTTTTCCTATAACACATGACAACTTTACGTTTCCTGGGAATTCCATGACTCTGTACCTTTACCTTACTTGCTGCCACTCCTCTTTTTCCACTTGGAAAAATTCTCATCTTTCAAGGCCTAGTTTGAATGTCTCCTTAAGTCCCCACCAGGAGGAGTTGTGAAATATGA
BRCA1	BRCA1_Intron_12__region_1__3	chr17	41237628	41237825	ACACTGACGACATGGTTCTACACTGCCACTCCTCTTTTTCCACT	TACGGTAGCAGAGACTTGGTCTTATACACTCTGCTTCCCTCCAGA	198	46	CTGCCACTCCTCTTTTTCCACTTGGAAAAATTCTCATCTTTCAAGGCCTAGTTTGAATGTCTCCTTAAGTCCCCACCAGGAGGAGTTGTGAAATATGAGAAGTAAGGGCAAGTGGGCAGAATGTGGCTAATTCTAATAAGACTCCTGAAATGTGCAGCAGAGCAGCCGGAACTGGTCTGGAGGGAAGCAGAGTGTATA
BRCA1	BRCA1_Intron_12__region_1__4	chr17	41237700	41237896	ACACTGACGACATGGTTCTACACCACCAGGAGGAGTTGTGAAATA	TACGGTAGCAGAGACTTGGTCTATACACATGTTTTATGGGAAGGTTTT	197	41	CCACCAGGAGGAGTTGTGAAATATGAGAAGTAAGGGCAAGTGGGCAGAATGTGGCTAATTCTAATAAGACTCCTGAAATGTGCAGCAGAGCAGCCGGAACTGGTCTGGAGGGAAGCAGAGTGTATATCTGACCCTTGTTTGTTCACATTCATTACATATAAATATATATATAAAACCTTCCCATAAAACATGTGTAT
BRCA1	BRCA1_19	chr17	41242903	41243101	ACACTGACGACATGGTTCTACACTACTGAATGCAAAGGACACCAC	TACGGTAGCAGAGACTTGGTCTGCAGCGTTTATAGTCTGCTTTTAC	199	45	CTACTGAATGCAAAGGACACCACACACACGCATGTGCACACACACACACGCTTTTTACCTGAGTGGTTAAAATGTCACTCTGAGAGGATAGCCCTGAGCAGTCTTCAGAGACGCTTGTTTCACTCTCACACCCAGATGCTGCTTCACCTTAAATAACAAAAACAGAGGTTCAGATGTAAAAGCAGACTATAAACGCTGC
BRCA1	BRCA1_20	chr17	41243373	41243569	ACACTGACGACATGGTTCTACAATGTGCTCCCCAAAAGCATAAAC	TACGGTAGCAGAGACTTGGTCTCAGTCTGAAAGCCAGGGAGTTG	197	41	ATGTGCTCCCCAAAAGCATAAACATTTAGCTCACTTCTATAAATAGACTGGGGCAAACACAAAAACCTGGTTCCAATACCTAAGTTTGAATCCATGCTTTGCTCTTCTTGATTATTTTCTTCCAAGCCCGTTCCTCTTTCTTCATCATCTGAAACCAATTCCTTGTCACTCAGACCAACTCCCTGGCTTTCAGACTG
BRCA1	BRCA1_21	chr17	41243485	41243674	ACACTGACGACATGGTTCTACATATTTTCTTCCAAGCCCGTTCCT	TACGGTAGCAGAGACTTGGTCTTCTGCTAGCTTGTTTTCTTCACA	190	43	TATTTTCTTCCAAGCCCGTTCCTCTTTCTTCATCATCTGAAACCAATTCCTTGTCACTCAGACCAACTCCCTGGCTTTCAGACTGATGCCTCATTTGTTTGGAAGAACCAATCAAGAAAGGATCCTGGGTGTTTGTATTTGCAGTCAAGTCTTCCAATTCACTGCACTGTGAAGAAAACAAGCTAGCAGA	Assays designed by relax mode and have no off-target hits
BRCA1	BRCA1_22	chr17	41243604	41243793	ACACTGACGACATGGTTCTACAGGATCCTGGGTGTTTGTATTTGC	TACGGTAGCAGAGACTTGGTCTTGTCTAAGAACACAGAGGAGAATTTA	190	39	GGATCCTGGGTGTTTGTATTTGCAGTCAAGTCTTCCAATTCACTGCACTGTGAAGAAAACAAGCTAGCAGAACATTTTGTTTCCTCACTAAGGTGATGTTCCTGAGATGCCTTTGCCAATATTACCTGGTTACTGCAGTCATTTAAGCTATTCTTCAATGATAATAAATTCTCCTCTGTGTTCTTAGACA	Assays designed by relax mode and have no off-target hits
BRCA1	BRCA1_23	chr17	41243699	41243897	ACACTGACGACATGGTTCTACAATGTTCCTGAGATGCCTTTGCC	TACGGTAGCAGAGACTTGGTCTTAGTGAGGATGAAGAGCTTCCCT	199	40	ATGTTCCTGAGATGCCTTTGCCAATATTACCTGGTTACTGCAGTCATTTAAGCTATTCTTCAATGATAATAAATTCTCCTCTGTGTTCTTAGACAGACACTCGGTAGCAACGGTGCTATGCCTAGTAGACTGAGAAGGTATATTGTTTACTTTACCAAATAACAAGTGTTGGAAGCAGGGAAGCTCTTCATCCTCACTA	Assays designed by relax mode and have no off-target hits
BRCA1	BRCA1_24	chr17	41243852	41244044	ACACTGACGACATGGTTCTACAACCAAATAACAAGTGTTGGAAGC	TACGGTAGCAGAGACTTGGTCTTGACATTAAGGAAAGTTCTGCTGTT	193	45	ACCAAATAACAAGTGTTGGAAGCAGGGAAGCTCTTCATCCTCACTAGATAAGTTCTCTTCTGAGGACTCTAATTTCTTGGCCCCTCTTCGGTAACCCTGAGCCAAATGTGTATGGGTGAAAGGGCTAGGACTCCTGCTAAGCTCTCCTTTCTGGACGCTTTTGCTAAAAACAGCAGAACTTTCCTTAATGTCA	Assays designed by relax mode and have no off-target hits
BRCA1	BRCA1_25	chr17	41243949	41244145	ACACTGACGACATGGTTCTACATGAGCCAAATGTGTATGGGTGAA	TACGGTAGCAGAGACTTGGTCTCAGCCTATGGGAAGTAGTCATGC	197	43	TGAGCCAAATGTGTATGGGTGAAAGGGCTAGGACTCCTGCTAAGCTCTCCTTTCTGGACGCTTTTGCTAAAAACAGCAGAACTTTCCTTAATGTCATTTTCAGCAAAACTAGTATCTTCCTTTATTTCACCATCATCTAACAGGTCATCAGGTGTCTCAGAACAAACCTGAGATGCATGACTACTTCCCATAGGCTG	Assays designed by relax mode and have no off-target hits
BRCA1	BRCA1_26	chr17	41244007	41244197	ACACTGACGACATGGTTCTACACGCTTTTGCTAAAAACAGCAGAAC	TACGGTAGCAGAGACTTGGTCTTCAGACTGTTAATACAGATTTCTCTCCA	191	37	CGCTTTTGCTAAAAACAGCAGAACTTTCCTTAATGTCATTTTCAGCAAAACTAGTATCTTCCTTTATTTCACCATCATCTAACAGGTCATCAGGTGTCTCAGAACAAACCTGAGATGCATGACTACTTCCCATAGGCTGTTCTAAGTTATCTGAAATCAGATATGGAGAGAAATCTGTATTAACAGTCTGA	Assays designed by relax mode and have no off-target hits
BRCA1	BRCA1_27	chr17	41244115	41244295	ACACTGACGACATGGTTCTACACCTGAGATGCATGACTACTTCCC	TACGGTAGCAGAGACTTGGTCTAGATTAGGGGTTTTGCAACCTGA	181	36	CCTGAGATGCATGACTACTTCCCATAGGCTGTTCTAAGTTATCTGAAATCAGATATGGAGAGAAATCTGTATTAACAGTCTGAACTACTTCTTCATATTCTTGCTTTTTTATTTCAGGATGCTTACAATTACTTCCAGGAAGACTTTGTTTATAGACCTCAGGTTGCAAAACCCCTAATCT	Assays designed by relax mode and have no off-target hits
BRCA1	BRCA1_28	chr17	41244171	41244361	ACACTGACGACATGGTTCTACAGGAGAGAAATCTGTATTAACAGTCTGAAC	TACGGTAGCAGAGACTTGGTCTTCCAGTGATGAAAACATTCAAGCA	191	37	GGAGAGAAATCTGTATTAACAGTCTGAACTACTTCTTCATATTCTTGCTTTTTTATTTCAGGATGCTTACAATTACTTCCAGGAAGACTTTGTTTATAGACCTCAGGTTGCAAAACCCCTAATCTAAGCATAGCATTCAATTTTGGCCCTCTGTTTCTACCTAGTTCTGCTTGAATGTTTTCATCactgga	Assays designed by relax mode and have no off-target hits
BRCA1	BRCA1_29	chr17	41244266	41244448	ACACTGACGACATGGTTCTACAATAGACCTCAGGTTGCAAAACCC	TACGGTAGCAGAGACTTGGTCTAATGTTTTTAAAGAAGCCAGCTCA	183	38	ATAGACCTCAGGTTGCAAAACCCCTAATCTAAGCATAGCATTCAATTTTGGCCCTCTGTTTCTACCTAGTTCTGCTTGAATGTTTTCATCactggaacctatttcattaatactggagcccacttcattagtactggaacctacttcattaataTTGCTTGAGCTGGCTTCTTTAAAAACATT	Assays designed by relax mode and have no off-target hits
BRCA1	BRCA1_30	chr17	41244375	41244557	ACACTGACGACATGGTTCTACAATACTGGAGCCCACTTCATTAGT	TACGGTAGCAGAGACTTGGTCTTCTGCTAGAGGAAAACTTTGAGGA	183	37	atactggagcccacttcattagtactggaacctacttcattaataTTGCTTGAGCTGGCTTCTTTAAAAACATTTTCTCTAATGTTATTACGGCTAATTGTGCTCACTGTACTTGGAATGTTCTCATTTCCCATTTCTCTTTCAGGTGACATTGAATGTTCCTCAAAGTTTTCCTCTAGCAGA	Assays designed by relax mode and have no off-target hits
BRCA1	BRCA1_31	chr17	41244473	41244671	ACACTGACGACATGGTTCTACATGTGCTCACTGTACTTGGAATGT	TACGGTAGCAGAGACTTGGTCTAGGCAACGAAACTGGACTCATTA	199	36	TGTGCTCACTGTACTTGGAATGTTCTCATTTCCCATTTCTCTTTCAGGTGACATTGAATGTTCCTCAAAGTTTTCCTCTAGCAGATTTTTCTTACATTTAGTTTTAACAAATGACTTGATGGGAAAAAGTGGTGGTATACGATATGGGTTTTGTAAAAGTCCATGTTTATTTGGAGTAATGAGTCCAGTTTCGTTGCCT	Assays designed by relax mode and have no off-target hits
BRCA1	BRCA1_32	chr17	41244586	41244763	ACACTGACGACATGGTTCTACAACTTGATGGGAAAAAGTGGTGGT	TACGGTAGCAGAGACTTGGTCTTTTCCTGTGGTTGGTCAGAAAGA	178	39	ACTTGATGGGAAAAAGTGGTGGTATACGATATGGGTTTTGTAAAAGTCCATGTTTATTTGGAGTAATGAGTCCAGTTTCGTTGCCTCTGAACTGAGATGATAGACAAAACCTAGAGCCTCCTTTGATACTACATTTGGCATTATCAACTGGCTTATCTTTCTGACCAACCACAGGAAA	Assays designed by relax mode and have no off-target hits
BRCA1	BRCA1_33	chr17	41244648	41244841	ACACTGACGACATGGTTCTACAGTAATGAGTCCAGTTTCGTTGCC	TACGGTAGCAGAGACTTGGTCTTGTGAACAAAAGGAAGAAAATCAAGGA	194	40	GTAATGAGTCCAGTTTCGTTGCCTCTGAACTGAGATGATAGACAAAACCTAGAGCCTCCTTTGATACTACATTTGGCATTATCAACTGGCTTATCTTTCTGACCAACCACAGGAAAGCCTGCAGTGATATTAACTGTCTGTACAGGCTTGATATTAGACTCATTCTTTCCTTGATTTTCTTCCTTTTGTTCACA	Assays designed by relax mode and have no off-target hits
BRCA1	BRCA1_34	chr17	41244742	41244940	ACACTGACGACATGGTTCTACACTTTCTGACCAACCACAGGAAAG	TACGGTAGCAGAGACTTGGTCTGCTCCGTTTTCAAATCCAGGAAA	199	41	CTTTCTGACCAACCACAGGAAAGCCTGCAGTGATATTAACTGTCTGTACAGGCTTGATATTAGACTCATTCTTTCCTTGATTTTCTTCCTTTTGTTCACATTCAAAAGTGACTTTTGGACTTTGTTTCTTTAAGGACCCAGAGTGGGCAGAGAATGTTGCACATTCCTCTTCTGCATTTCCTGGATTTGAAAACGGAGC	Assays designed by relax mode and have no off-target hits
BRCA1	BRCA1_35	chr17	41244864	41245040	ACACTGACGACATGGTTCTACATGTTTCTTTAAGGACCCAGAGTG	TACGGTAGCAGAGACTTGGTCTAGTTAACCACAGTCGGGAAACAA	177	42	TGTTTCTTTAAGGACCCAGAGTGGGCAGAGAATGTTGCACATTCCTCTTCTGCATTTCCTGGATTTGAAAACGGAGCAAATGACTGGCGCTTTGAAACCTTGAATGTATTCTGCAAATACTGAGCATCAAGTTCACTTTCTTCCATTTCTATGCTTGTTTCCCGACTGTGGTTAACT	Assays designed by relax mode and have no off-target hits
BRCA1	BRCA1_36	chr17	41244947	41245144	ACACTGACGACATGGTTCTACACTGGCGCTTTGAAACCTTGAAT	TACGGTAGCAGAGACTTGGTCTGTGAGTCAGTGTGCAGCATTTG	198	40	CTGGCGCTTTGAAACCTTGAATGTATTCTGCAAATACTGAGCATCAAGTTCACTTTCTTCCATTTCTATGCTTGTTTCCCGACTGTGGTTAACTTCATGTCCCAATGGATACTTAAAGCCTTCTGTGTCATTTCTATTATCTTTGGAACAACCATGAATTAGTCCCTTGGGGTTTTCAAATGCTGCACACTGACTCAC	Assays designed by relax mode and have no off-target hits
BRCA1	BRCA1_37	chr17	41245044	41245232	ACACTGACGACATGGTTCTACATGTCCCAATGGATACTTAAAGCC	TACGGTAGCAGAGACTTGGTCTACCTGGTACTGATTATGGCACTC	189	41	TGTCCCAATGGATACTTAAAGCCTTCTGTGTCATTTCTATTATCTTTGGAACAACCATGAATTAGTCCCTTGGGGTTTTCAAATGCTGCACACTGACTCACACATTTATTTGGTTCTGTTTTTGCCTTCCCTAGAGTGCTAACTTCCAGTAACGAGATACTTTCCTGAGTGCCATAATCAGTACCAGGT	Assays designed by relax mode and have no off-target hits
BRCA1	BRCA1_38	chr17	41245154	41245339	ACACTGACGACATGGTTCTACATGGTTCTGTTTTTGCCTTCCCTA	TACGGTAGCAGAGACTTGGTCTACAGTTAAAGTGTCTAATAATGCTGAAGA	186	40	TGGTTCTGTTTTTGCCTTCCCTAGAGTGCTAACTTCCAGTAACGAGATACTTTCCTGAGTGCCATAATCAGTACCAGGTACCAATGAAATACTGCTACTCTCTACAGATCTTTCAGTTTGCAAAACCCTTTCTCCACTTAACATGAGATCTTTGGGGTCTTCAGCATTATTAGACACTTTAACTGT	Assays designed by relax mode and have no off-target hits
BRCA1	BRCA1_39	chr17	41245246	41245433	ACACTGACGACATGGTTCTACATGCTACTCTCTACAGATCTTTCAGTT	TACGGTAGCAGAGACTTGGTCTACCTGGTTCTTTTACTAAGTGTTCAAA	188	36	TGCTACTCTCTACAGATCTTTCAGTTTGCAAAACCCTTTCTCCACTTAACATGAGATCTTTGGGGTCTTCAGCATTATTAGACACTTTAACTGTTTCTAGTTTCTCTTCTTTTTCTTCTCTTGGAAGGCTAGGATTGACAAATTCTTTAAGTTCACTGGTATTTGAACACTTAGTAAAAGAACCAGGT	Assays designed by relax mode and have no off-target hits
BRCA1	BRCA1_40	chr17	41245357	41245539	ACACTGACGACATGGTTCTACATTTCTTCTCTTGGAAGGCTAGGA	TACGGTAGCAGAGACTTGGTCTAAGGTAAAGAACCTGCAACTGGA	183	39	TTTCTTCTCTTGGAAGGCTAGGATTGACAAATTCTTTAAGTTCACTGGTATTTGAACACTTAGTAAAAGAACCAGGTGCATTTGTTAACTTCAGCTCTGGGAAAGTATCGCTGTCATGTCTTTTACTTGTCTGTTCATTTGGCTTGTTACTCTTCTTGGCTCCAGTTGCAGGTTCTTTACCTT	Assays designed by relax mode and have no off-target hits
BRCA1	BRCA1_41	chr17	41245455	41245653	ACACTGACGACATGGTTCTACAGGGAAAGTATCGCTGTCATGTCT	TACGGTAGCAGAGACTTGGTCTGCCCACCTAATTGTACTGAATTGC	199	41	GGGAAAGTATCGCTGTCATGTCTTTTACTTGTCTGTTCATTTGGCTTGTTACTCTTCTTGGCTCCAGTTGCAGGTTCTTTACCTTCCATGAGTTGTAGGTTTCTGCTGTGCCTGACTGGCATTTGGTTGTACTTTTTTTTCTTTATCTCTTCACTGCTAGAACAACTATCAATTTGCAATTCAGTACAATTAGGTGGGC	Assays designed by relax mode and have no off-target hits
BRCA1	BRCA1_42	chr17	41245543	41245737	ACACTGACGACATGGTTCTACATGAGTTGTAGGTTTCTGCTGTGC	TACGGTAGCAGAGACTTGGTCTAAGCACCTAAAAAGAATAGGCTGA	195	39	TGAGTTGTAGGTTTCTGCTGTGCCTGACTGGCATTTGGTTGTACTTTTTTTTCTTTATCTCTTCACTGCTAGAACAACTATCAATTTGCAATTCAGTACAATTAGGTGGGCTTAGATTTCTACTGACTACTAGTTCAAGCGCATGAATATGCCTGGTAGAAGACTTCCTCCTCAGCCTATTCTTTTTAGGTGCTT	Assays designed by relax mode and have no off-target hits
BRCA1	BRCA1_43	chr17	41245646	41245835	ACACTGACGACATGGTTCTACAAGGTGGGCTTAGATTTCTACTGAC	TACGGTAGCAGAGACTTGGTCTAGAATCACTCGAAAAAGAATCTGC	190	38	AGGTGGGCTTAGATTTCTACTGACTACTAGTTCAAGCGCATGAATATGCCTGGTAGAAGACTTCCTCCTCAGCCTATTCTTTTTAGGTGCTTTTGAATTGTGGATATTTAATTCGAGTTCCATATTGCTTATACTGCTGCTTATAGGTTCAGCTTTCGTTTTGAAAGCAGATTCTTTTTCGAGTGATTCT	Assays designed by relax mode and have no off-target hits
BRCA1	BRCA1_44	chr17	41245703	41245894	ACACTGACGACATGGTTCTACAAGACTTCCTCCTCAGCCTATTCT	TACGGTAGCAGAGACTTGGTCTGGTCATGAGAATAAAACAAAAGGTGATTCT	192	35	AGACTTCCTCCTCAGCCTATTCTTTTTAGGTGCTTTTGAATTGTGGATATTTAATTCGAGTTCCATATTGCTTATACTGCTGCTTATAGGTTCAGCTTTCGTTTTGAAAGCAGATTCTTTTTCGAGTGATTCTATTGGGTTAGGATTTTTCTCATTCTGAATAGAATCACCTTTTGTTTTATTCTCATGACC	Assays designed by relax mode and have no off-target hits
BRCA1	BRCA1_45	chr17	41245824	41245994	ACACTGACGACATGGTTCTACATCGAGTGATTCTATTGGGTTAGGA	TACGGTAGCAGAGACTTGGTCTCAAGAAAGCAGATTTGGCAGTTCA	171	36	TCGAGTGATTCTATTGGGTTAGGATTTTTCTCATTCTGAATAGAATCACCTTTTGTTTTATTCTCATGACCACTATTAGTAATATTCATCACTTGACCATTCTGCTCCGTTTGGTTAGTTCCCTGATTTATCATTTCAGGAGTCTTTTGAACTGCCAAATCTGCTTTCTTG	Assays designed by relax mode and have no off-target hits
BRCA1	BRCA1_46	chr17	41245929	41246123	ACACTGACGACATGGTTCTACATCCGTTTGGTTAGTTCCCTGATTT	TACGGTAGCAGAGACTTGGTCTCCATGTAACTGAAAATCTAATTATAGGAGCA	195	38	TCCGTTTGGTTAGTTCCCTGATTTATCATTTCAGGAGTCTTTTGAACTGCCAAATCTGCTTTCTTGATAAAATCCTCAGGATGAAGGCCTGATGTAGGTCTCCTTTTACGCTTTAATTTATTTGTGAGGGGACGCTCTTGTATTATCTGTGGCTCAGTAACAAATGCTCCTATAATTAGATTTTCAGTTACATGG	Assays designed by relax mode and have no off-target hits
BRCA1	BRCA1_47	chr17	41246014	41246212	ACACTGACGACATGGTTCTACAGGCCTGATGTAGGTCTCCTTTTA	TACGGTAGCAGAGACTTGGTCTAGAGTTCACTCCAAATCAGTAGAG	199	39	GGCCTGATGTAGGTCTCCTTTTACGCTTTAATTTATTTGTGAGGGGACGCTCTTGTATTATCTGTGGCTCAGTAACAAATGCTCCTATAATTAGATTTTCAGTTACATGGCTTAAGTTGGGGAGGCTTGCCTTCTTCCGATAGGTTTTCCCAAATATTTTGTCTTCAATATTACTCTCTACTGATTTGGAGTGAACTCT	Assays designed by relax mode and have no off-target hits
BRCA1	BRCA1_48	chr17	41246138	41246324	ACACTGACGACATGGTTCTACAGCTTGCCTTCTTCCGATAGGT	TACGGTAGCAGAGACTTGGTCTAGTAGCTGATGTATTGGACGTTCT	187	37	GCTTGCCTTCTTCCGATAGGTTTTCCCAAATATTTTGTCTTCAATATTACTCTCTACTGATTTGGAGTGAACTCTTTCACTTTTACATATTAAAGCCTCATGAGGATCACTGGCCAGTAAGTCTATTTTCTCTGAAGAACCAGAATATTCATCTACCTCATTTAGAACGTCCAATACATCAGCTACT	Assays designed by relax mode and have no off-target hits
BRCA1	BRCA1_49	chr17	41246190	41246388	ACACTGACGACATGGTTCTACATCTACTGATTTGGAGTGAACTCTTT	TACGGTAGCAGAGACTTGGTCTCCAGAAGTGATGAACTGTTAGGT	199	39	TCTACTGATTTGGAGTGAACTCTTTCACTTTTACATATTAAAGCCTCATGAGGATCACTGGCCAGTAAGTCTATTTTCTCTGAAGAACCAGAATATTCATCTACCTCATTTAGAACGTCCAATACATCAGCTACTTTGGCATTTGATTCAGACTCCCCATCATGTGAGTCATCAGAACCTAACAGTTCATCACTTCTGG	Assays designed by relax mode and have no off-target hits
BRCA1	BRCA1_50	chr17	41246313	41246488	ACACTGACGACATGGTTCTACAACATCAGCTACTTTGGCATTTGA	TACGGTAGCAGAGACTTGGTCTAATAAGCAGAAACTGCCATGCTC	176	40	ACATCAGCTACTTTGGCATTTGATTCAGACTCCCCATCATGTGAGTCATCAGAACCTAACAGTTCATCACTTCTGGAAAACCACTCATTAACTTTCTGAATGCTGCTATTTAGTGTTATCCAAGGAACATCTTCAGTATCTCTAGGATTCTCTGAGCATGGCAGTTTCTGCTTATT	Assays designed by relax mode and have no off-target hits
BRCA1	BRCA1_51	chr17	41246413	41246606	ACACTGACGACATGGTTCTACATGCTGCTATTTAGTGTTATCCAAGG	TACGGTAGCAGAGACTTGGTCTAAGGAGCCAACATAACAGATGGG	194	43	TGCTGCTATTTAGTGTTATCCAAGGAACATCTTCAGTATCTCTAGGATTCTCTGAGCATGGCAGTTTCTGCTTATTCCATTCTTTTCTCTCACACAGGGGATCAGCATTCAGATCTACCTTTTTTTCTGTGCTGGGAGTCCGCCTATCATTACATGTTTCCTTACTTCCAGCCCATCTGTTATGTTGGCTCCTT	Assays designed by relax mode and have no off-target hits
BRCA1	BRCA1_52	chr17	41246501	41246699	ACACTGACGACATGGTTCTACACTCACACAGGGGATCAGCATTC	TACGGTAGCAGAGACTTGGTCTACAGCATGAGAACAGCAGTTTATT	199	42	CTCACACAGGGGATCAGCATTCAGATCTACCTTTTTTTCTGTGCTGGGAGTCCGCCTATCATTACATGTTTCCTTACTTCCAGCCCATCTGTTATGTTGGCTCCTTGCTAAGCCAGGCTGTTTGCTTTTATTACAGAATTCAGCCTTTTCTACATTCATTCTGTCTTTAGTGAGTAATAAACTGCTGTTCTCATGCTGT	Assays designed by relax mode and have no off-target hits
BRCA1	BRCA1_53	chr17	41246584	41246781	ACACTGACGACATGGTTCTACACCCATCTGTTATGTTGGCTCCTT	TACGGTAGCAGAGACTTGGTCTGGCATCCAGAAAAGTATCAGGGTA	198	42	CCCATCTGTTATGTTGGCTCCTTGCTAAGCCAGGCTGTTTGCTTTTATTACAGAATTCAGCCTTTTCTACATTCATTCTGTCTTTAGTGAGTAATAAACTGCTGTTCTCATGCTGTAATGAGCTGGCATGAGTATTTGTGCCACATGGCTCCACATGCAAGTTTGAAACAGAACTACCCTGATACTTTTCTGGATGCC	Assays designed by relax mode and have no off-target hits
BRCA1	BRCA1_54	chr17	41246695	41246882	ACACTGACGACATGGTTCTACAGCTGTAATGAGCTGGCATGAGTA	TACGGTAGCAGAGACTTGGTCTTTCAGCTGCTTGTGAATTTTCTG	188	43	GCTGTAATGAGCTGGCATGAGTATTTGTGCCACATGGCTCCACATGCAAGTTTGAAACAGAACTACCCTGATACTTTTCTGGATGCCTCTCAGCTGCACGCTTCTCAGTGGTGTTCAAATCATTATTACTGGGTTGATGATGTTCAGTATTTGTTACATCCGTCTCAGAAAATTCACAAGCAGCTGAA	Assays designed by relax mode and have no off-target hits
BRCA1	BRCA1_55	chr17	41246761	41246959	ACACTGACGACATGGTTCTACACCTGATACTTTTCTGGATGCCTCT	TACGGTAGCAGAGACTTGGTCTCCACCTCCAAGGTGTATGAAGTA	199	37	CCTGATACTTTTCTGGATGCCTCTCAGCTGCACGCTTCTCAGTGGTGTTCAAATCATTATTACTGGGTTGATGATGTTCAGTATTTGTTACATCCGTCTCAGAAAATTCACAAGCAGCTGAAAATATACAAAAATAACAAGGTACTCAAAAACTGAATTGTCATTAAAAAAATACATACTTCATACACCTTGGAGGTGG	Assays designed by relax mode and have no off-target hits
BRCA1	BRCA1_56	chr17	41247808	41248006	ACACTGACGACATGGTTCTACATGTATCTACCCACTCTCTTTTCAGT	TACGGTAGCAGAGACTTGGTCTGGTCATTTGACAGTTCTGCATAC	199	40	TGTATCTACCCACTCTCTTTTCAGTGCCTGTTAAGTTGGCAAACTTTGCCATTACCCTTTTTTGCAGAATCCAAACTGATTTCATCCCTGGTTCCTTGAGGGGTGATTTGTAACAATTCTTGATCTCCCACACTATAGGGAAAAGACAGAGTCCTAATAAGAAACACTAGTTACATGTATGCAGAACTGTCAAATGACC
BRCA1	BRCA1_57	chr17	41249130	41249324	ACACTGACGACATGGTTCTACAACAAACTGCACATACATCCCTGA	TACGGTAGCAGAGACTTGGTCTTGGGGGGAAATTTTTTAGGATCTG	195	32	acaaactgcacatacatccctgaacctaaaataaaagttaaaaTATTTTTAAAAAGAGAGAAACATCAATCCTTAATATTAACTAAATAGGAAAATACCAGCTTCATAGACAAAGGTTCTCTTTGACTCACCTGCAATAAGTTGCCTTATTAACGGTATCTTCAGAAGAATCAGATCCTAAAAAATTTCCCCCCA	Assays designed by relax mode and have no off-target hits
BRCA1	BRCA1_58	chr17	41249255	41249439	ACACTGACGACATGGTTCTACAACTCACCTGCAATAAGTTGCCTT	TACGGTAGCAGAGACTTGGTCTGCATTGTACCTGCCACAGTAGAT	185	31	ACTCACCTGCAATAAGTTGCCTTATTAACGGTATCTTCAGAAGAATCAGATCCTAAAAAATTTCCCCCCAAAAAATAAATCAATAAAAGTTTTCTTAATTAAAAGGGTTAAAAAAATGTACTTGTTGAAAAACAGATattcaactagaaatatttactgagcatctactgtggcaggtacaatgc	Assays designed by relax mode and have no off-target hits
BRCA1	BRCA1_59	chr17	41251674	41251855	ACACTGACGACATGGTTCTACAATTCACTTCCCAAAGCTGCCTAC	TACGGTAGCAGAGACTTGGTCTGTGAGAACTCTGAGGACAAAGCA	182	37	ATTCACTTCCCAAAGCTGCCTACCACAAATACAAATTATGACCAAGATTTTTGGCAAAACTATAAGATAAGGAATCCAGCAATTATTATTAAATACTTAAAAAACCTGAGACCCTTACCCAATTCAATGTAGACAGACGTCTTTTGAGGTTGTATCCGCTGCTTTGTCCTCAGAGTTCTCAC	Assays designed by relax mode and have no off-target hits
BRCA1	BRCA1_60	chr17	41251773	41251963	ACACTGACGACATGGTTCTACAAAAAACCTGAGACCCTTACCCAA	TACGGTAGCAGAGACTTGGTCTCTCTTCAGGAGGAAAAGCACAGA	191	45	AAAAACCTGAGACCCTTACCCAATTCAATGTAGACAGACGTCTTTTGAGGTTGTATCCGCTGCTTTGTCCTCAGAGTTCTCACAGTTCCAAGGTTAGAGAGTTGGACACTGAGACTGGTTTCCTGCTAAACAGTATGGTAAAGAACAGTCAAGCAATTGTTGGCCAGTTCTGTGCTTTTCCTCCTGAAGAG	Assays designed by relax mode and have no off-target hits
BRCA1	BRCA1_61	chr17	41256105	41256293	ACACTGACGACATGGTTCTACAAGAAGAAGAAGAAGAAGAAAACAAATGG	TACGGTAGCAGAGACTTGGTCTCCTTGTATTTTACAGATGCAAACAGC	189	35	agaagaagaagaagaagaaAACAAATGGTTTTACCAAGGAAGGATTTTCGGGTTCACTCTGTAGAAGTCTTTTGGCACGGTTTCTGTAGCCCATACTTTGGATGATAGAAACTTCATCTTTTAGATGTTCAGGAGAGTTATTTTCCTTTTTTGCAAAATTATAGCTGTTTGCATCTGTAAAATACAAGG	Assays designed by relax mode and have no off-target hits
BRCA1	BRCA1_62	chr17	41256170	41256368	ACACTGACGACATGGTTCTACAAGTCTTTTGGCACGGTTTCTGTA	TACGGTAGCAGAGACTTGGTCTGCATACATAGGGTTTCTCTTGGT	199	33	AGTCTTTTGGCACGGTTTCTGTAGCCCATACTTTGGATGATAGAAACTTCATCTTTTAGATGTTCAGGAGAGTTATTTTCCTTTTTTGCAAAATTATAGCTGTTTGCATCTGTAAAATACAAGGGAAAACATTATGTTTGCAGTTAGAGAAAAATGTATGAATTATAATCAAAGAAACCAAGAGAAACCCTATGTATGC	Assays designed by relax mode and have no off-target hits
BRCA1	BRCA1_63	chr17	41256828	41257012	ACACTGACGACATGGTTCTACATTCCTGAGTTTTCATGGACAGCA	TACGGTAGCAGAGACTTGGTCTTCACTTGCTGAGTGTGTTTCTCA	185	38	TTCCTGAGTTTTCATGGACAGCACTTGAGTGTCATTCTTGGGATATTCAACACTTACACTCCAAACCTGTGTCAAGCTGAAAAGCACAAATGATTTTCAATAGCTCTTCAACAAGTTGACTAAATCTCGTACTTTCTTGTAGGCTCCTGAAATTAAATTGTTTGAGAAACACACTCAGCAAGTGA
BRCA1	BRCA1_64	chr17	41258420	41258615	ACACTGACGACATGGTTCTACAACTTTTTCCTACTGTGGTTGCTT	TACGGTAGCAGAGACTTGGTCTTTTTGAGTATTCTTTCTACAAAAGGAAGTAAAT	196	31	ACTTTTTCCTACTGTGGTTGCTTCCAACCTAGCATCATTACCAAATTATATACCTTTTGGTTATATCATTCTTACATAAAGGACACTGTGAAGGCCCTTTCTTCTGGTTGAGAAGTTTCAGCATGCAAAATCTATAAATTATAAAGAAAGAAAGAACAATTTAATTTACTTCCTTTTGTAGAAAGAATACTCAAAA
BRCA1	BRCA1_65	chr17	41267715	41267905	ACACTGACGACATGGTTCTACATGGAGCCACATAACACATTCAAA	TACGGTAGCAGAGACTTGGTCTACTCAGTCATAACAGCTCAAAGT	191	37	TGGAGCCACATAACACATTCAAACTTACTTGCAAAATATGTGGTCACACTTTGTGGAGACAGGTTCCTTGATCAACTCCAGACTAGCAGGGTAGGGGGGGAGAAAAAGAAAATAAATGAGGCTCaataatttatttaaaaataaaGCTATTCTTAGTGAATAAGTTCAACTTTGAGCTGTTATGACTGAGT
BRCA1	BRCA1_Intron_2__region_1__1	chr17	41271145	41271333	ACACTGACGACATGGTTCTACATGTGACAAGAATGTGGTTTTTTCCT	TACGGTAGCAGAGACTTGGTCTTCCACAAGCTTTTCTTGTGATCC	189	42	TGTGACAAGAATGTGGTTTTTTCCTTAAATATTTAACTTTTTAGAAAAGGATCACAAGggccaggtgcggtggctcacgctgtaatcccagcattttgggaggccaaggcgggccagcctgggtgacagagaatccatctcaaaaaaagaaaaaaaaaaaagaaaaGGATCACAAGAAAAGCTTGTGGA
BRCA1	BRCA1_Intron_2__region_1__2	chr17	41271314	41271508	ACACTGACGACATGGTTCTACATCACAAGAAAAGCTTGTGGACAG	TACGGTAGCAGAGACTTGGTCTGAAACAGGTTCAGGTAGAGTGGT	195	42	TCACAAGAAAAGCTTGTGGACAGTAACCTTATTGTGAAGGGTTGTAATACAACTCTTGTAATCATGGGGTTTTTGACATAGCACAGGgcagtgaaaagaaaaacaatgaactaagtcaggaggctgggtttctactaccagttgtgtatataagcagagccaccttgggctaaccactctacctgaacctgtttc	One primer sits in the repeat region
BRCA1	BRCA1_Intron_2__region_1__3	chr17	41271383	41271556	ACACTGACGACATGGTTCTACATTTTTGACATAGCACAGGGCAGT	TACGGTAGCAGAGACTTGGTCTATTCTTGCAATAGCCCAAGGAGT	174	45	TTTTTGACATAGCACAGGgcagtgaaaagaaaaacaatgaactaagtcaggaggctgggtttctactaccagttgtgtatataagcagagccaccttgggctaaccactctacctgaacctgtttccttctcttgccattcaccctgccagactccttgggctattgcaagaat	Two primers sits in the repeat region
BRCA1	BRCA1_Intron_2__region_1__4	chr17	41271482	41271675	ACACTGACGACATGGTTCTACAGCTAACCACTCTACCTGAACCTG	TACGGTAGCAGAGACTTGGTCTAAAGTCACATTTGGTCCCAGTAA	194	41	gctaaccactctacctgaacctgtttccttctcttgccattcaccctgccagactccttgggctattgcaagaataaaattaaatgctacttgggaaaatgcttcacaacctgagatgacttgggaaaaatgcttcacaacctgagataacttgTACCAACATTGGTATTATTACTGGGACCAAATGTGACTTT	One primer sits in the repeat region
BRCA1	BRCA1_Intron_2__region_1__5	chr17	41271534	41271710	ACACTGACGACATGGTTCTACAACTCCTTGGGCTATTGCAAGAAT	TACGGTAGCAGAGACTTGGTCTTCAGAGTTTTCTTTGTCAAGGTTGTT	177	36	actccttgggctattgcaagaataaaattaaatgctacttgggaaaatgcttcacaacctgagatgacttgggaaaaatgcttcacaacctgagataacttgTACCAACATTGGTATTATTACTGGGACCAAATGTGACTTTAAAAAGAAAAACAACCTTGACAAAGAAAACTCTGA	One primer sits in the repeat region
BRCA1	BRCA1_Intron_2__region_1__6	chr17	41271642	41271822	ACACTGACGACATGGTTCTACACATTGGTATTATTACTGGGACCAAATGT	TACGGTAGCAGAGACTTGGTCTAGTCAGTGGTGAGAATGAAAGCC	181	33	CATTGGTATTATTACTGGGACCAAATGTGACTTTAAAAAGAAAAACAACCTTGACAAAGAAAACTCTGATTGGTTACTAAATCCCTATTTCTGAGATAAGCTACATTTCAAAGAAATTCTCCGTAAAAGAAAAATTGGATTCAGTTATCATACCAGATGGCTTTCATTCTCACCACTGACT
BRCA1	BRCA1_Intron_2__region_1__7	chr17	41271721	41271916	ACACTGACGACATGGTTCTACAAATCCCTATTTCTGAGATAAGCTACAT	TACGGTAGCAGAGACTTGGTCTTCGGAGTTTTCATCTGTTCAAAGT	196	31	AATCCCTATTTCTGAGATAAGCTACATTTCAAAGAAATTCTCCGTAAAAGAAAAATTGGATTCAGTTATCATACCAGATGGCTTTCATTCTCACCACTGACTCAATTCTGAAACAATTATATTTCAGTATGGTAATTATAATCTAAACTATATAAACACACTGTAAACACAAACTTTGAACAGATGAAAACTCCGA
BRCA1	BRCA1_Intron_2__region_1__8	chr17	41271811	41272000	ACACTGACGACATGGTTCTACATCACCACTGACTCAATTCTGAAAC	TACGGTAGCAGAGACTTGGTCTTCAGGACCTAGAAGGGGAACATT	190	31	TCACCACTGACTCAATTCTGAAACAATTATATTTCAGTATGGTAATTATAATCTAAACTATATAAACACACTGTAAACACAAACTTTGAACAGATGAAAACTCCGATATGTAAAAAGGTAATGAATGTTGAAGGAAGACTGTGAAAAGGGAAAAGAAAAAAAATTAAAATGTTCCCCTTCTAGGTCCTGA
BRCA1	BRCA1_Intron_2__region_1__9	chr17	41271942	41272115	ACACTGACGACATGGTTCTACAAGGAAGACTGTGAAAAGGGAAAAGAA	TACGGTAGCAGAGACTTGGTCTTCACTTATCCGTATTGGAAGCTCA	174	31	AGGAAGACTGTGAAAAGGGAAAAGAAAAAAAATTAAAATGTTCCCCTTCTAGGTCCTGATGAGAGTAAATGTTTACTATAAAAATGATTCAAATATTTTAAACACTTTTCAAACCAGGCAATATTTTAGGCCTACTGTATATTTGCATTTTGAGCTTCCAATACGGATAAGTGA
BRCA1	BRCA1_Intron_2__region_1__10	chr17	41271985	41272159	ACACTGACGACATGGTTCTACACCCTTCTAGGTCCTGATGAGAGTA	TACGGTAGCAGAGACTTGGTCTGGTGGGTTGTTGTTTTTCAACCT	175	35	CCCTTCTAGGTCCTGATGAGAGTAAATGTTTACTATAAAAATGATTCAAATATTTTAAACACTTTTCAAACCAGGCAATATTTTAGGCCTACTGTATATTTGCATTTTGAGCTTCCAATACGGATAAGTGACTGGAAAAAGCAGCTAGGTTTAGGTTGAAAAACAACAACCCACC	Multiple hits
BRCA1	BRCA1_Intron_2__region_2__1	chr17	41275655	41275814	ACACTGACGACATGGTTCTACAGCCCTCGGCCTCATCCAT	TACGGTAGCAGAGACTTGGTCTAATCCTGTGGTCCGGGAAAGAC	160	46	gccctcggccTCATCCATGATTTTATTTTGCCATTTCAAGTGATGGAGCTTGTTTTAGAGCTGGAAGAAAAGCCAAAATGCCAGTTAATCTAAACTAGATTCCTGCCCCAGTGCAGAACCAATCAAGACAGAGTCCCTGTCTTTCCCGGACCACAGGATT	One primer sits in the repeat region
BRCA1	BRCA1_Intron_2__region_2__3	chr17	41275694	41275869	ACACTGACGACATGGTTCTACAGTGATGGAGCTTGTTTTAGAGCTG	TACGGTAGCAGAGACTTGGTCTTGATTCCTTGTTCTCCATCCACT	176	47	GTGATGGAGCTTGTTTTAGAGCTGGAAGAAAAGCCAAAATGCCAGTTAATCTAAACTAGATTCCTGCCCCAGTGCAGAACCAATCAAGACAGAGTCCCTGTCTTTCCCGGACCACAGGATTTGTGTTGAAAAGGAGAGGAGTGGGAGAGGCAGAGTGGATGGAGAACAAGGAATCA
BRCA1	BRCA1_Intron_2__region_2__4	chr17	41275796	41275973	ACACTGACGACATGGTTCTACATTTCCCGGACCACAGGATTTG	TACGGTAGCAGAGACTTGGTCTACAGAATTGACCTTACATACTAGGG	178	38	TTTCCCGGACCACAGGATTTGTGTTGAAAAGGAGAGGAGTGGGAGAGGCAGAGTGGATGGAGAACAAGGAATCATTTTCTATATTTTTAAAGTTCTTCAGTTAAGAAAATCAGCAATTACAATAGCCTAATCTTACTAGACATGTCTTTTCTTCCCTAGTATGTAAGGTCAATTCTGT
BRCA1	BRCA1_Intron_2__region_2__5	chr17	41275844	41276026	ACACTGACGACATGGTTCTACACAGAGTGGATGGAGAACAAGGAA	TACGGTAGCAGAGACTTGGTCTAGCACAAGAGTGTATTAATTTGGGA	183	33	CAGAGTGGATGGAGAACAAGGAATCATTTTCTATATTTTTAAAGTTCTTCAGTTAAGAAAATCAGCAATTACAATAGCCTAATCTTACTAGACATGTCTTTTCTTCCCTAGTATGTAAGGTCAATTCTGTTCATTTGCATAGGAGATAATCATAGGAATCCCAAATTAATACACTCTTGTGCT
BRCA1	BRCA1_66	chr17	41275974	41276147	ACACTGACGACATGGTTCTACATCATTTGCATAGGAGATAATCATAGGAA	TACGGTAGCAGAGACTTGGTCTTCTAATGTGTTAAAGTTCATTGGAACAG	174	35	TCATTTGCATAGGAGATAATCATAGGAATCCCAAATTAATACACTCTTGTGCTGACTTACCAGATGGGACACTCTAAGATTTTCTGCATAGCATTAATGACATTTTGTACTTCTTCAACGCGAAGAGCAGATAAATCCATTTCTTTCTGTTCCAATGAACTTTAACACATTAGA
BRCA1	BRCA1_5_UTR__exon_1B__1	chr17	41277107	41277305	ACACTGACGACATGGTTCTACACTTCCCTCGCGACCTACAAAC	TACGGTAGCAGAGACTTGGTCTCCTCTGCTCTGGGTAAAGGTAGT	199	60	CTTCCCTCGCGACCTACAAACTGCCCCCCTCCCCAGGGTTCACAACGCCTTACGCCTCTCAGGTTCCGCCCCTACCCCCCGTCAAAGAATACCCATCTGTCAGCTTCGGAAATCCACTCTCCCACGCCAGTACCCCAGAGCATCACTTGGGCCCCCTGTCCCTTTCCCGGGACTCTACTACCTTTACCCAGAGCAGAGG
BRCA1	BRCA1_prom1AextF_1	chr17	41277234	41277419	ACACTGACGACATGGTTCTACACAGTACCCCAGAGCATCACTT	TACGGTAGCAGAGACTTGGTCTACAGATAAATTAAAACTGCGACTGC	186	59	CAGTACCCCAGAGCATCACTTGGGCCCCCTGTCCCTTTCCCGGGACTCTACTACCTTTACCCAGAGCAGAGGGTGAAGGCCTCCTGAGCGCAGGGGCCCAGTTATCTGAGAAACCCCACAGCCTGTCCCCCGTCCAGGAAGTCTCAGCGAGCTCACGCCGCGCAGTCGCAGTTTTAATTTATCTGT
BRCA1	BRCA1_5_UTR__exon_1A__2	chr17	41277330	41277526	ACACTGACGACATGGTTCTACACCCAGTTATCTGAGAAACCCCAC	TACGGTAGCAGAGACTTGGTCTCTTTCTGTCCCTCCCATCCTCT	197	54	CCCAGTTATCTGAGAAACCCCACAGCCTGTCCCCCGTCCAGGAAGTCTCAGCGAGCTCACGCCGCGCAGTCGCAGTTTTAATTTATCTGTAATTCCCGCGCTTTTCCGTTGCCACGGAAACCAAGGGGCTACCGCTAAGCAGCAGCCTCTCAGAATACGAAATCAAGGTACAATCAGAGGATGGGAGGGACAGAAAG
BRCA1	BRCA1_prom1AextF_3	chr17	41277442	41277637	ACACTGACGACATGGTTCTACACACGGAAACCAAGGGGCTAC	TACGGTAGCAGAGACTTGGTCTAGGCACTTTATGGCAAACTCAGG	196	53	CACGGAAACCAAGGGGCTACCGCTAAGCAGCAGCCTCTCAGAATACGAAATCAAGGTACAATCAGAGGATGGGAGGGACAGAAAGAGCCAAGCGTCTCTCGGGGCTCTGGATTGGCCACCCAGTCTGCCCCCGGATGACGTAAAAGGAAAGAGACGGAAGAGGAAGAATTCTACCTGAGTTTGCCATAAAGTGCCT
BRCA1	BRCA1_prom1AextF_4	chr17	41277536	41277729	ACACTGACGACATGGTTCTACATCTCTCGGGGCTCTGGATTG	TACGGTAGCAGAGACTTGGTCTACTGCTTTGGACAATAGGTAGCG	194	51	TCTCTCGGGGCTCTGGATTGGCCACCCAGTCTGCCCCCGGATGACGTAAAAGGAAAGAGACGGAAGAGGAAGAATTCTACCTGAGTTTGCCATAAAGTGCCTGCCCTCTAGCCTCTACTCTTCCAGTTGCGGCTTATTGCATCACAGTAATTGCTGTACGAAGGTCAGAATCGCTACCTATTGTCCAAAGCAGT
BRCA1	BRCA1_Promoter_3	chr17	41277639	41277818	ACACTGACGACATGGTTCTACACCCTCTAGCCTCTACTCTTCCAG	TACGGTAGCAGAGACTTGGTCTCCCCCCAACAATCCTTATTACTT	180	48	CCCTCTAGCCTCTACTCTTCCAGTTGCGGCTTATTGCATCACAGTAATTGCTGTACGAAGGTCAGAATCGCTACCTATTGTCCAAAGCAGTCGTAAGAAGAGGTCCCAATCCCCCACTCTTTCCGCCCTAATGGAGGTCTCCAGTTTCGGTAAATATAAGTAATAAGGATTGTTGGGGGG
BRCA1	BRCA1_Promoter_4	chr17	41277726	41277921	ACACTGACGACATGGTTCTACACAGTCGTAAGAAGAGGTCCCAAT	TACGGTAGCAGAGACTTGGTCTTGGTATTGGATGTTCCTCTCCAT	196	46	CAGTCGTAAGAAGAGGTCCCAATCCCCCACTCTTTCCGCCCTAATGGAGGTCTCCAGTTTCGGTAAATATAAGTAATAAGGATTGTTGGGGGGGTGGAGGGAAATAATTATTTCCAGCATGCGTTGCGGAATGAAAGGTCTTCGCCACAGTGTTCCTTAGAAACTGTAGTCTTATGGAGAGGAACATCCAATACCA
BRCA1	BRCA1_Promoter_5	chr17	41277847	41278043	ACACTGACGACATGGTTCTACACGTTGCGGAATGAAAGGTCTTC	TACGGTAGCAGAGACTTGGTCTAGGCCTAGTTTCTGCTTTCAAAAT	197	46	CGTTGCGGAATGAAAGGTCTTCGCCACAGTGTTCCTTAGAAACTGTAGTCTTATGGAGAGGAACATCCAATACCAGAGCGGGCACAATTCTCACGGAAATCCAGTGGATAGATTGGAGACCTGTGCGCGCTTGTACTTGTCAACAGTTATGGACTGGAGTGTTATGTTTTCGTATTTTGAAAGCAGAAACTAGGCCT
BRCA1	BRCA1_Promoter_6	chr17	41277901	41278096	ACACTGACGACATGGTTCTACAGGAGAGGAACATCCAATACCAGAG	TACGGTAGCAGAGACTTGGTCTCTGGGGCTGGATGGGAATTG	196	45	GGAGAGGAACATCCAATACCAGAGCGGGCACAATTCTCACGGAAATCCAGTGGATAGATTGGAGACCTGTGCGCGCTTGTACTTGTCAACAGTTATGGACTGGAGTGTTATGTTTTCGTATTTTGAAAGCAGAAACTAGGCCTTAAAAAGATACGTACAACTCTTTAGGGAGACTACAATTCCCATCCAGCCCCAG
BRCA1	BRCA1_Promoter_7	chr17	41278016	41278210	ACACTGACGACATGGTTCTACATCGTATTTTGAAAGCAGAAACTAGGC	TACGGTAGCAGAGACTTGGTCTGAACTACGAGTGCGCAGACA	195	53	TCGTATTTTGAAAGCAGAAACTAGGCCTTAAAAAGATACGTACAACTCTTTAGGGAGACTACAATTCCCATCCAGCCCCAGGAGTCTGGGGCAAGTAGTCTTGTAAGGTCAGTGGCCTGCGGGGACGCAGTGAGCGCCGAATTTGCCTGGGGCAGGGGAAATGCGCTCTGGCCCATGTCTGCGCACTCGTAGTTC
BRCA1	BRCA1_Promoter_8	chr17	41278126	41278324	ACACTGACGACATGGTTCTACAAGTGGCCTGCGGGGAC	TACGGTAGCAGAGACTTGGTCTTTACCACTTGTCCCTCAAAACGA	199	59	AGTGGCCTGCGGGGACGCAGTGAGCGCCGAATTTGCCTGGGGCAGGGGAAATGCGCTCTGGCCCATGTCTGCGCACTCGTAGTTCCACCCCTCAGCCCCAGTGTTTGTTATTTTTCGGGTTCAGCTTGCTTTTGCCCCGTCTCCGTCGACGCAATCGCCACCAGTCAATGGGGTGGTCGTTTTGAGGGACAAGTGGTAA
BRCA1	BRCA1_Promoter_9	chr17	41278254	41278449	ACACTGACGACATGGTTCTACACTTTTGCCCCGTCTCCGT	TACGGTAGCAGAGACTTGGTCTGAGGCGGCAATGCAAAGAC	196	56	CTTTTGCCCCGTCTCCGTCGACGCAATCGCCACCAGTCAATGGGGTGGTCGTTTTGAGGGACAAGTGGTAAGAGCCAATCTTCTTGGCGAAAACGCGGAGAAACGGGACTAGTTACTGTCTTTGTCCGCCATGTTAGATTCACCCCACAGAGATAGCGGCAGAGCTGGCAGCGGACGGTCTTTGCATTGCCGCCTC
BRCA1	BRCA1_Promoter_10	chr17	41278347	41278528	ACACTGACGACATGGTTCTACACGCGGAGAAACGGGACTAGTTA	TACGGTAGCAGAGACTTGGTCTCTCCAAACCCTCTTAGTGTGACG	182	59	CGCGGAGAAACGGGACTAGTTACTGTCTTTGTCCGCCATGTTAGATTCACCCCACAGAGATAGCGGCAGAGCTGGCAGCGGACGGTCTTTGCATTGCCGCCTCCCCAGGGGGCGGGAAGCTGGTAAGGAAGCAGCCTGGGTTAGCTAGGGGTGGGGTCACGTCACACTAAGAGGGTTTGGAG
BRCA1_3UTR_Combined	BRCA1_3UTR_Combined_14	chr17	41196714	41196888	ACACTGACGACATGGTTCTACATCTTTGGAAACCGGTTCTTG	TACGGTAGCAGAGACTTGGTCTAGATCATACCACGGCACTCC	175	35	TCTTTGGAAACCGGTTCTTGAAAATCTTCTGCTGTTTTAGAACACATTCTTTAGAAATCTAGCAAATATATCTCAGACTTTTAGAAATCTCTTCTAGTTTCATTTTCCTTTTTTTTTTTTTTTTTTTGAGCCACAGTCTCACTGTCACCCAGGCTGGAGTGCCGTGGTATGATCT
BRCA1_3UTR_Combined	BRCA1_3UTR_Combined_15	chr17	41197039	41197205	ACACTGACGACATGGTTCTACATCGAACTCCTGACCTCCAGT	TACGGTAGCAGAGACTTGGTCTGTCCTTGGGCAGTTCTCAAA	167	51	TCGAACTCCTGACCTCCAGTGATCTGCCCACCTTGGCCTCCCAAAGTGCTGGGATTACAGGCGTGAGCCACCATGCCCAGGTTTCAAGTTTCCTTTTCATTTCTAATACCTGCCTCAGAATTTCCTCCCCAATGTTCCACTCCAACATTTGAGAACTGCCCAAGGAC
BRCA1_Intron_2__region_1_	BRCA1_Intron_2__region_1__11	chr17	41271259	41271409	ACACTGACGACATGGTTCTACACAGCCTGGGTGACAGAGAAT	TACGGTAGCAGAGACTTGGTCTTTTCACTGCCCTGTGCTATG	151	38	CAGCCTGGGTGACAGAGAATCCATCTCAAAAAAAGAAAAAAAAAAAAGAAAAGGATCACAAGAAAAGCTTGTGGACAGTAACCTTATTGTGAAGGGTTGTAATACAACTCTTGTAATCATGGGGTTTTTGACATAGCACAGGGCAGTGAAA
BRCA1_Intron_2__region_2_	BRCA1_Intron_2__region_2__7	chr17	41275415	41275564	ACACTGACGACATGGTTCTACATGGAGTTCAGTGGTGCCATA	TACGGTAGCAGAGACTTGGTCTTGAAACCCCCTCTCCACTAA	150	50	TGGAGTTCAGTGGTGCCATATTGGCTCACAGCAACATCTGCCTCCTGGTTCAAGTGATTCTCCTGCCTCAGCCTCCTGAGTAGCTGGGATTACAGGCACATGCCACTACGCCCAGCTAATTTTTGTATTTTTAGTGGAGAGGGGGTTTCA
BRCA1_Intron_2__region_2_	BRCA1_Intron_2__region_2__8	chr17	41275545	41275700	ACACTGACGACATGGTTCTACATTAGTGGAGAGGGGGTTTCA	TACGGTAGCAGAGACTTGGTCTCCATCACTTGAAATGGCAAA	156	53	TTAGTGGAGAGGGGGTTTCACCATGTTGGCCAGGATGGTCTCGATCTCCTGACCTCGTGATCCTACCACCTTGGCCTCCCAAAGTGCTGGGATTACAGGCATAAGCCACCGCCCTCGGCCTCATCCATGATTTTATTTTGCCATTTCAAGTGATGG
BRCA2	BRCA2_Promoter_1	chr13	32888507	32888705	ACACTGACGACATGGTTCTACACACCTTCTGGAAGCAGCAA	TACGGTAGCAGAGACTTGGTCTCATCTTTTGCATTCTTAGGATTCGG	199	47	CACCTTCTGGAAGCAGCAAGGCCCCCATGGGAGCAACTCTCACTGAATCCATTTGAAGGTTTTGTAGGTCTTACAACAAACCCTATTCAGCCTTGTATTAGGCATGTTACAGAACCAACGAATTCGGAGATGAAGTCAGGTCTTCCAGTTCAGCCTGCGAGGAAGACAGGTGATCCGAATCCTAAGAATGCAAAAGATG
BRCA2	BRCA2_Promoter_3	chr13	32888996	32889147	ACACTGACGACATGGTTCTACAaaaagcaaaaGATACTACCAAGCC	TACGGTAGCAGAGACTTGGTCTTTTAGTTCCAGTAGCTGTTCTGC	152	46	aaaagcaaaaGATACTACCAAGCCCTGCGGAGCAAGGTACCTCACACTTCATGAGCGAGTTAAGATGGGTTTCACAATTTTTCAAGCAAGGAAACGGGCTCGGAGGTCTTGAACACCTGCTACCCAATAGCAGAACAGCTACTGGAACTAAA	One primer sits in the repeat region
BRCA2	BRCA2_Promoter_6	chr13	32889044	32889230	ACACTGACGACATGGTTCTACATCATGAGCGAGTTAAGATGGGTT	TACGGTAGCAGAGACTTGGTCTAAAAGCTTAGAGTGGTCGGTGTG	187	46	TCATGAGCGAGTTAAGATGGGTTTCACAATTTTTCAAGCAAGGAAACGGGCTCGGAGGTCTTGAACACCTGCTACCCAATAGCAGAACAGCTACTGGAACTAAAATCCTCTGATTTCAAATAACAGCCCCGCCCACTACCACTAAGTGAAGTCATCCACAACCACACACCGACCACTCTAAGCTTTT
BRCA2	BRCA2_prom_Stacey_1	chr13	32889175	32889357	ACACTGACGACATGGTTCTACACCCACTACCACTAAGTGAAGTCAT	TACGGTAGCAGAGACTTGGTCTTTTTTGCTCCAGCTCATGTTTGG	183	50	CCCACTACCACTAAGTGAAGTCATCCACAACCACACACCGACCACTCTAAGCTTTTGTAAGATCGGCTCGCTTTGGGGAACAGGTCTTGAGAGAACATCCCTTTTAAGGTCAGAACAAAGGTATTTCATAGGTCCCAGGTCGTGTCCCGAGGGCGCCCACCCAAACATGAGCTGGAGCAAAAA
BRCA2	BRCA2_prom_Stacey_2	chr13	32889210	32889390	ACACTGACGACATGGTTCTACACACCGACCACTCTAAGCTTTTGT	TACGGTAGCAGAGACTTGGTCTCCCTATGCCTACTCCAAGTCCC	181	52	CACCGACCACTCTAAGCTTTTGTAAGATCGGCTCGCTTTGGGGAACAGGTCTTGAGAGAACATCCCTTTTAAGGTCAGAACAAAGGTATTTCATAGGTCCCAGGTCGTGTCCCGAGGGCGCCCACCCAAACATGAGCTGGAGCAAAAAGAAAGGGATGGGGGACTTGGAGTAGGCATAGGG
BRCA2	BRCA2_Promoter_Combined_7	chr13	32889335	32889530	ACACTGACGACATGGTTCTACACCAAACATGAGCTGGAGCAAAAA	TACGGTAGCAGAGACTTGGTCTATTTCTCAGTGTGGCGAAAGGAA	196	54	CCAAACATGAGCTGGAGCAAAAAGAAAGGGATGGGGGACTTGGAGTAGGCATAGGGGCGGCCCCTCCAAGCAGGGTGGCCTGGGACTCTTAAGGGTCAGCGAGAAGAGAACACACACTCCAGCTCCCGCTTTATTCGGTCAGATACTGACGGTTGGGATGCCTGACAAGGAATTTCCTTTCGCCACACTGAGAAAT
BRCA2	BRCA2_Promoter_10	chr13	32889458	32889650	ACACTGACGACATGGTTCTACATCCCGCTTTATTCGGTCAGATAC	TACGGTAGCAGAGACTTGGTCTGCCTCTGCCGCCTAGTT	193	62	TCCCGCTTTATTCGGTCAGATACTGACGGTTGGGATGCCTGACAAGGAATTTCCTTTCGCCACACTGAGAAATACCCGCAGCGGCCCACCCAGGCCTGACTTCCGGGTGGTGCGTGTGCTGCGTGTCGCGTCACGGCGTCACGTGGCCAGCGCGGGCTTGTGGCGCGAGCTTCTGAAACTAGGCGGCAGAGGC
BRCA2	BRCA2_Promoter_Combined_10	chr13	32889508	32889703	ACACTGACGACATGGTTCTACATTCCTTTCGCCACACTGAGAAAT	TACGGTAGCAGAGACTTGGTCTCCGCAAAAGACACCCGAGG	196	67	TTCCTTTCGCCACACTGAGAAATACCCGCAGCGGCCCACCCAGGCCTGACTTCCGGGTGGTGCGTGTGCTGCGTGTCGCGTCACGGCGTCACGTGGCCAGCGCGGGCTTGTGGCGCGAGCTTCTGAAACTAGGCGGCAGAGGCGGAGCCGCTGTGGCACTGCTGCGCCTCTGCTGCGCCTCGGGTGTCTTTTGCGG
BRCA2	BRCA2_5_UTR__exon_1__2	chr13	32889663	32889835	ACACTGACGACATGGTTCTACAGCACTGCTGCGCCTCT	TACGGTAGCAGAGACTTGGTCTCTCGTCCCAACCCACTACCA	173	62	GCACTGCTGCGCCTCTGCTGCGCCTCGGGTGTCTTTTGCGGCGGTGGGTCGCCGCCGGGAGAAGCGTGAGGGGACAGATTTGTGACCGGCGCGGTTTTTGTCAGCTTACTCCGGCCAAAAAAGAACTGCACCTCTGGAGCGGGTTAGTGGTGGTGGTAGTGGGTTGGGACGAG
BRCA2	BRCA2_prom_Stacey_7	chr13	32889723	32889921	ACACTGACGACATGGTTCTACAGAAGCGTGAGGGGACAGATTT	TACGGTAGCAGAGACTTGGTCTAGAGACAAAAGGGCAAGAAGCC	199	63	GAAGCGTGAGGGGACAGATTTGTGACCGGCGCGGTTTTTGTCAGCTTACTCCGGCCAAAAAAGAACTGCACCTCTGGAGCGGGTTAGTGGTGGTGGTAGTGGGTTGGGACGAGCGCGTCTTCCGCAGTCCCAGTCCAGCGTGGCGGGGGAGCGCCTCACGCCCCGGGTCGCTGCCGCGGCTTCTTGCCCTTTTGTCTCT
BRCA2	BRCA2_prom_Stacey_8	chr13	32889839	32890018	ACACTGACGACATGGTTCTACAGTCTTCCGCAGTCCCAGTC	TACGGTAGCAGAGACTTGGTCTGAAATGGAGACCCAGGGAAGG	180	64	GTCTTCCGCAGTCCCAGTCCAGCGTGGCGGGGGAGCGCCTCACGCCCCGGGTCGCTGCCGCGGCTTCTTGCCCTTTTGTCTCTGCCAACCCCCACCCATGCCTGAGAGAAAGGTCCTTGCCCGAAGGCAGATTTTCGCCAAGCAAATTCGAGCCCCGCCCCTTCCCTGGGTCTCCATTTC
BRCA2	BRCA2_1	chr13	32890522	32890720	ACACTGACGACATGGTTCTACATCCCTGTGTAAGTGCATTTTGGT	TACGGTAGCAGAGACTTGGTCTTTTTAGAAAACACTTTCTCGGTGTAAT	199	34	TCCCTGTGTAAGTGCATTTTGGTCTTCTGTTTTGCAGACTTATTTACCAAGCATTGGAGGAATATCGTAGGTAAAAATGCCTATTGGATCCAAAGAGAGGCCAACATTTTTTGAAATTTTTAAGACACGCTGCAACAAAGCAGGTATTGACAAATTTTATATAACTTTATAAATTACACCGAGAAAGTGTTTTCTAAAA
BRCA2	BRCA2_2	chr13	32893174	32893358	ACACTGACGACATGGTTCTACATCACTGGTTAAAACTAAGGTGGGA	TACGGTAGCAGAGACTTGGTCTTAAGATGGTTTCCTTTGTGGAGT	185	32	TCACTGGTTAAAACTAAGGTGGGATTTTTTTTTTAAATAGATTTAGGACCAATAAGTCTTAATTGGTTTGAAGAACTTTCTTCAGAAGCTCCACCCTATAATTCTGAACCTGCAGAAGAATCTGAACATAAAAACAACAATTACGAACCAAACCTATTTAAAACTCCACAAAGGAAACCATCTTA
BRCA2	BRCA2_3	chr13	32893249	32893426	ACACTGACGACATGGTTCTACACTTTCTTCAGAAGCTCCACCCTA	TACGGTAGCAGAGACTTGGTCTGAGATTGGTACAGCGGCAGAG	178	39	CTTTCTTCAGAAGCTCCACCCTATAATTCTGAACCTGCAGAAGAATCTGAACATAAAAACAACAATTACGAACCAAACCTATTTAAAACTCCACAAAGGAAACCATCTTATAATCAGCTGGCTTCAACTCCAATAATATTCAAAGAGCAAGGGCTGACTCTGCCGCTGTACCAATCTC	Assays designed by relax mode and have no off-target hits
BRCA2	BRCA2_4	chr13	32893336	32893492	ACACTGACGACATGGTTCTACAACTCCACAAAGGAAACCATCTTA	TACGGTAGCAGAGACTTGGTCTCTCCCCAGTCTACCATATTGCAT	157	39	ACTCCACAAAGGAAACCATCTTATAATCAGCTGGCTTCAACTCCAATAATATTCAAAGAGCAAGGGCTGACTCTGCCGCTGTACCAATCTCCTGTAAAAGAATTAGATAAATTCAAATTAGACTTAGGTAAGTAATgcaatatggtagactggggag	One primer sits in the repeat region
BRCA2	BRCA2_Intron_3_1	chr13	32897972	32898163	ACACTGACGACATGGTTCTACAACTTAATGCCCTGGAGAGTCAAA	TACGGTAGCAGAGACTTGGTCTAGACAAAGTGAGTTGCAGACAGTA	192	29	ACTTAATGCCCTGGAGAGTCAAATATAATCTACTCTAATACAGAAAATAGAAATATTGAAAAACTGTAAATTGGATTTCATATTGTTAAAGCCACCTATAGCTTTAGAAACTCTGAACATTATTTTCTTAGAAAATGGATGTGTTCAATAAGAATAGAAATTATGTATTACTGTCTGCAACTCACTTTGTCT
BRCA2	BRCA2_Intron_3_2	chr13	32898044	32898221	ACACTGACGACATGGTTCTACAGGATTTCATATTGTTAAAGCCACCTAT	TACGGTAGCAGAGACTTGGTCTTGTCTGGTATATTAGTCACTCCTGAA	178	30	GGATTTCATATTGTTAAAGCCACCTATAGCTTTAGAAACTCTGAACATTATTTTCTTAGAAAATGGATGTGTTCAATAAGAATAGAAATTATGTATTACTGTCTGCAACTCACTTTGTCTAATTATATCCAatttattcatccagtcaatatttcaggagtgactaatataccagaca	One primer sits in the repeat region
BRCA2	BRCA2_Intron_3_3	chr13	32898141	32898311	ACACTGACGACATGGTTCTACAACTGTCTGCAACTCACTTTGTCT	TACGGTAGCAGAGACTTGGTCTACACTGTTCTTTTTCCCCCTACT	171	37	ACTGTCTGCAACTCACTTTGTCTAATTATATCCAatttattcatccagtcaatatttcaggagtgactaatataccagacatttttgtagttgctagggatacagtgacaaataagacaaaatctctacctcagattgctcacagcctagtagggggaaaaagaacagtgt	One primer sits in the repeat region
BRCA2	BRCA2_Intron_3_4	chr13	32898184	32898355	ACACTGACGACATGGTTCTACATCCAGTCAATATTTCAGGAGTGACTAA	TACGGTAGCAGAGACTTGGTCTTTAAGTGTTTGCCCCCCTATGTG	172	40	tccagtcaatatttcaggagtgactaatataccagacatttttgtagttgctagggatacagtgacaaataagacaaaatctctacctcagattgctcacagcctagtagggggaaaaagaacagtgtatgatcaaactcttcagggaacacataggggggcaaacacttaa	Two primers sits in the repeat region
BRCA2	BRCA2_Intron_3_5	chr13	32898267	32898457	ACACTGACGACATGGTTCTACATACCTCAGATTGCTCACAGCCTA	TACGGTAGCAGAGACTTGGTCTGCTGTTTCCCCTTCTTTGCTTTT	191	44	tacctcagattgctcacagcctagtagggggaaaaagaacagtgtatgatcaaactcttcagggaacacataggggggcaaacacttaatcttaccttagggatcactacagttttctggaggaggtagtttctaaatggaagcctgaaagagttgttccaggtcaagaaaagcaaagaaggggaaacagc	Two primers sits in the repeat region
BRCA2	BRCA2_Intron_3_6	chr13	32898366	32898559	ACACTGACGACATGGTTCTACAGGGATCACTACAGTTTTCTGGAGG	TACGGTAGCAGAGACTTGGTCTAATTTTTATGATGCCATTCTTTTACAGTC	194	38	gggatcactacagttttctggaggaggtagtttctaaatggaagcctgaaagagttgttccaggtcaagaaaagcaaagaaggggaaacagcttgtacaaagtcctagaggttaaagaaaacattctttcaggatatgcaaatggttgggtatgggtaaaaagtagactgtaaaagaatggCATCATAAAAATT	Two primers sits in the repeat region
BRCA2	BRCA2_Intron_3_7	chr13	32898426	32898622	ACACTGACGACATGGTTCTACACAGGTCAAGAAAAGCAAAGAAGGG	TACGGTAGCAGAGACTTGGTCTTTTCTTCATTTTTAATTTTTGTGGGTACAT	197	30	caggtcaagaaaagcaaagaaggggaaacagcttgtacaaagtcctagaggttaaagaaaacattctttcaggatatgcaaatggttgggtatgggtaaaaagtagactgtaaaagaatggCATCATAAAAATTAAGTAAATTGTCAcataaatatatatatttcttatgtacccacaaaaattaaaaaTGAAGAAA	Two primers sits in the repeat region
BRCA2	BRCA2_Intron_3_8	chr13	32898527	32898716	ACACTGACGACATGGTTCTACAAGTAGACTGTAAAAGAATGGCATCA	TACGGTAGCAGAGACTTGGTCTTGACAATATCACTTGTGCTAAAAACCT	190	27	agtagactgtaaaagaatggCATCATAAAAATTAAGTAAATTGTCAcataaatatatatatttcttatgtacccacaaaaattaaaaaTGAAGAAATTAAGTAAATTGTGAAAGGCCTTCATACTATGGAGTTTGACTTGATCTTGAAAAGTAAGATCTTGAAAGGTTTTTAGCACAAGTGATATTGTCA	One primer sits in the repeat region
BRCA2	BRCA2_5	chr13	32899149	32899334	ACACTGACGACATGGTTCTACACCAAAGAATGCAAATTTATAATCCAGAGT	TACGGTAGCAGAGACTTGGTCTAGCTTCATCATACCTTTCACTAAGAC	186	34	ccaaagaatgcaaatttataatcCAGAGTATATACATTCTCACTGAATTATTGTACTGTTTCAGGAAGGAATGTTCCCAATAGTAGACATAAAAGTCTTCGCACAGTGAAAACTAAAATGGATCAAGCAGATGATGTTTCCTGTCCACTTCTAAATTCTTGTCTTAGTGAAAGGTATGATGAAGCt	Assays designed by relax mode and have no off-target hits
BRCA2	BRCA2_6	chr13	32899280	32899435	ACACTGACGACATGGTTCTACATGATGTTTCCTGTCCACTTCTAAA	TACGGTAGCAGAGACTTGGTCTTCTACCAGGCTCTTAGCCAAAAT	156	28	TGATGTTTCCTGTCCACTTCTAAATTCTTGTCTTAGTGAAAGGTATGATGAAGCtattatattaaaatatttaaatGAAACATTTTCCTACATATATTTGTTCTATAAAGATGAATCTGATTTTTATGCTAATATTTTGGCTAAGAGCCTGGTAGA
BRCA2	BRCA2_7	chr13	32900202	32900400	ACACTGACGACATGGTTCTACAAAAATAACCTAAGGGATTTGCTTTGT	TACGGTAGCAGAGACTTGGTCTTGAAACAAACTCCCACATACCACT	199	30	AAAATAACCTAAGGGATTTGCTTTGTTTTATTTTAGTCCTGTTGTTCTACAATGTACACATGTAACACCACAAAGAGATAAGTCAGGTATGATTAAAAACAATGCTTTTTATTCTTAGAATACTAGAAATGTTAATAAAAATAAAACTTAACAATTTTCCCCTTTTTTTACCCCCAGTGGTATGTGGGAGTTTGTTTCA	Assays designed by relax mode and have no off-target hits
BRCA2	BRCA2_8	chr13	32900331	32900527	ACACTGACGACATGGTTCTACATGTTAATAAAAATAAAACTTAACAATTTTCCCCTT	TACGGTAGCAGAGACTTGGTCTTGAGGCAGAATGCTAGGTACAGA	197	33	TGTTAATAAAAATAAAACTTAACAATTTTCCCCTTTTTTTACCCCCAGTGGTATGTGGGAGTTTGTTTCATACACCAAAGTTTGTGAAGGTAAATATTCTACCTGGTTTATTTTTATGACTTAGTAATTGAGAATTTGACAATAGCGTTATACCTTTGCCCTGAGATTTACAAATCTGTACCTAGCATTCTGCCTCA
BRCA2	BRCA2_9	chr13	32900545	32900728	ACACTGACGACATGGTTCTACAACGTTAAGTGAAATAAAGAGTGAATGAA	TACGGTAGCAGAGACTTGGTCTGGTGGGTGGTGTAGCTAAAGA	184	37	ACGTTAAGTGAAATAAAGAGTGAATGAAAAAATAATATCCTTAATGATCAGGGCATTTCTATAAAAAATAAACTATTTTCTTTCCTCCCAGGGTCGTCAGACACCAAAACATATTTCTGAAAGTCTAGGAGCTGAGGTGGATCCTGATATGTCTTGGTCAAGTTCTTTAGCTACACCACCCACC
BRCA2	BRCA2_10	chr13	32900618	32900797	ACACTGACGACATGGTTCTACATATTTTCTTTCCTCCCAGGGTCGT	TACGGTAGCAGAGACTTGGTCTTCAACCTCATCTGCTCTTTCTTG	180	41	TATTTTCTTTCCTCCCAGGGTCGTCAGACACCAAAACATATTTCTGAAAGTCTAGGAGCTGAGGTGGATCCTGATATGTCTTGGTCAAGTTCTTTAGCTACACCACCCACCCTTAGTTCTACTGTGCTCATAGGTAATAATAGCAAATGTGTATTTACAAGAAAGAGCAGATGAGGTTGA	Assays designed by relax mode and have no off-target hits
BRCA2	BRCA2_11	chr13	32903475	32903668	ACACTGACGACATGGTTCTACATGTGTCATGTAATCAAATAGTAGATGTG	TACGGTAGCAGAGACTTGGTCTAGCAATTTCAACAGTCTAATCAATGTC	194	29	TGTGTCATGTAATCAAATAGTAGATGTGCTTTTTGATGTCTGACAAAAAATAAGTTTTTGCATTCTAGTGATAATATACAATACACATAAATTTTTATCTTACAGTCAGAAATGAAGAAGCATCTGAAACTGTATTTCCTCATGATACTACTGCTGTAAGTAAATATGACATTGATTAGACTGTTGAAATTGCT
BRCA2	BRCA2_Intron_8_1	chr13	32904422	32904620	ACACTGACGACATGGTTCTACATGTGACAGCAAAACCAGCTCATA	TACGGTAGCAGAGACTTGGTCTGGCCCCAAAGCACAAGTATAATG	199	38	tgtgacagcaaaaccagctcatatgtctttctccttcacaatctcacagatagatttgttcttaccatagatgtcgcagtacaatttttttcctttccttaagtcgagaactttcactgtttcaattaaaggaagcactttatggcttctttttggcatatttgaattgccagcatcattatacttgtgctttggggcc	Two primers sits in the repeat region
BRCA2	BRCA2_Intron_8_2	chr13	32904478	32904657	ACACTGACGACATGGTTCTACATGTTCTTACCATAGATGTCGCAGT	TACGGTAGCAGAGACTTGGTCTTGCTTGTGTTCAAGTCACCCTTA	180	36	tgttcttaccatagatgtcgcagtacaatttttttcctttccttaagtcgagaactttcactgtttcaattaaaggaagcactttatggcttctttttggcatatttgaattgccagcatcattatacttgtgctttggggccattgttaagtaaaataagggtgacttgaacacaagca	Two primers sits in the repeat region
BRCA2	BRCA2_Intron_8_3	chr13	32904600	32904770	ACACTGACGACATGGTTCTACATTATACTTGTGCTTTGGGGCCAT	TACGGTAGCAGAGACTTGGTCTACTTGGGACATGAATCATCCCTT	171	43	ttatacttgtgctttggggccattgttaagtaaaataagggtgacttgaacacaagcactgtggtaccacaatagccgatctgataaccaagacaactactaagtgactaataggtgggtaccatatacagcctggatacgctggacaaagggatgattcatgtcccaagt	Two primers sits in the repeat region
BRCA2	BRCA2_Intron_8_4	chr13	32904673	32904852	ACACTGACGACATGGTTCTACAAGCCGATCTGATAACCAAGACAA	TACGGTAGCAGAGACTTGGTCTCTTGCACCACTAGGATGTGGAAA	180	43	agccgatctgataaccaagacaactactaagtgactaataggtgggtaccatatacagcctggatacgctggacaaagggatgattcatgtcccaagtgggatggagcaagatggtgcaagtttttttttctccatttccattttcctttcctaagatttccacatcctagtggtgcaag	Two primers sits in the repeat region
BRCA2	BRCA2_Intron_8_5	chr13	32904749	32904920	ACACTGACGACATGGTTCTACAAGGGATGATTCATGTCCCAAGTG	TACGGTAGCAGAGACTTGGTCTGGAAAATTCCAGAAGTAAGCAATTAGT	172	38	agggatgattcatgtcccaagtgggatggagcaagatggtgcaagtttttttttctccatttccattttcctttcctaagatttccacatcctagtggtgcaagatttcatcacactactcaggatgacacacaatttaaaacttactaattgcttacttctggaattttcc	Two primers sits in the repeat region
BRCA2	BRCA2_Intron_8_6	chr13	32904844	32905015	ACACTGACGACATGGTTCTACATGGTGCAAGATTTCATCACACTA	TACGGTAGCAGAGACTTGGTCTTCAATGCACATATAGTAGTAGTCCC	172	35	tggtgcaagatttcatcacactactcaggatgacacacaatttaaaacttactaattgcttacttctggaattttccattaaaaatttttggacctaggttgattgcagataactgaaatcaccaaaagtgaaaccatggataaggggggactactACTATATGTGCATTGA	Two primers sits in the repeat region
BRCA2	BRCA2_Intron_8_7	chr13	32904887	32905077	ACACTGACGACATGGTTCTACAAAAACTTACTAATTGCTTACTTCTGGAAT	TACGGTAGCAGAGACTTGGTCTTGGAAAAATAGCTTTTCACATTCTGC	191	31	aaaacttactaattgcttacttctggaattttccattaaaaatttttggacctaggttgattgcagataactgaaatcaccaaaagtgaaaccatggataaggggggactactACTATATGTGCATTGAGAGTTTTTATACTAGTGATTTTAAACTATAATTTTTGCAGAATGTGAAAAGCTATTTTTCCA	Assays designed by relax mode and have no off-target hits
BRCA2	BRCA2_12	chr13	32904990	32905188	ACACTGACGACATGGTTCTACAGGGGACTACTACTATATGTGCATTGA	TACGGTAGCAGAGACTTGGTCTTCAACTAAACAGAGGACTTACCATGA	199	33	ggggactactACTATATGTGCATTGAGAGTTTTTATACTAGTGATTTTAAACTATAATTTTTGCAGAATGTGAAAAGCTATTTTTCCAATCATGATGAAAGTCTGAAGAAAAATGATAGATTTATCGCTTCTGTGACAGACAGTGAAAACACAAATCAAAGAGAAGCTGCAAGTCATGGTAAGTCCTCTGTTTAGTTGA	Assays designed by relax mode and have no off-target hits
BRCA2	BRCA2_126	chr13	32905120	32905279	ACACTGACGACATGGTTCTACACTGTGACAGACAGTGAAAACACA	TACGGTAGCAGAGACTTGGTCTAGGTTGCGGTAAACCGAGAT	160	40	CTGTGACAGACAGTGAAAACACAAATCAAAGAGAAGCTGCAAGTCATGGTAAGTCCTCTGTTTAGTTGAACTACAGGTTTTTTTGTTGTTGTTGTTTTGATTTTTTTTTTTTGAGGTGGAGTCTTGCTCTGTCACCCGTGATCTCGGTTTACCGCAACCT
BRCA2	BRCA2_13	chr13	32906365	32906537	ACACTGACGACATGGTTCTACATGGCTTATAAAATATTAATGTGCTTCTGT	TACGGTAGCAGAGACTTGGTCTAACTATCTTCTTCAGAGGTATCTACAAC	173	32	TGGCTTATAAAATATTAATGTGCTTCTGTTTTATACTTTAACAGGATTTGGAAAAACATCAGGGAATTCATTTAAAGTAAATAGCTGCAAAGACCACATTGGAAAGTCAATGCCAAATGTCCTAGAAGATGAAGTATATGAAACAGTTGTAGATACCTCTGAAGAAGATAGTT	Assays designed by relax mode and have no off-target hits
BRCA2	BRCA2_14	chr13	32906405	32906593	ACACTGACGACATGGTTCTACAACAGGATTTGGAAAAACATCAGGG	TACGGTAGCAGAGACTTGGTCTGCTAGTTCTTACTTTTTGTAGATTTTTTGTTCT	189	31	ACAGGATTTGGAAAAACATCAGGGAATTCATTTAAAGTAAATAGCTGCAAAGACCACATTGGAAAGTCAATGCCAAATGTCCTAGAAGATGAAGTATATGAAACAGTTGTAGATACCTCTGAAGAAGATAGTTTTTCATTATGTTTTTCTAAATGTAGAACAAAAAATCTACAAAAAGTAAGAACTAGC	Assays designed by relax mode and have no off-target hits
BRCA2	BRCA2_15	chr13	32906502	32906695	ACACTGACGACATGGTTCTACAATGAAACAGTTGTAGATACCTCTGAA	TACGGTAGCAGAGACTTGGTCTTGGTTCCACTTCAGATACAAATGAGT	194	29	ATGAAACAGTTGTAGATACCTCTGAAGAAGATAGTTTTTCATTATGTTTTTCTAAATGTAGAACAAAAAATCTACAAAAAGTAAGAACTAGCAAGACTAGGAAAAAAATTTTCCATGAAGCAAACGCTGATGAATGTGAAAAATCTAAAAACCAAGTGAAAGAAAAATACTCATTTGTATCTGAAGTGGAACCA	Assays designed by relax mode and have no off-target hits
BRCA2	BRCA2_16	chr13	32906614	32906786	ACACTGACGACATGGTTCTACACCATGAAGCAAACGCTGATGAAT	TACGGTAGCAGAGACTTGGTCTAAGACGGTACAACTTCCTTGGAG	173	36	CCATGAAGCAAACGCTGATGAATGTGAAAAATCTAAAAACCAAGTGAAAGAAAAATACTCATTTGTATCTGAAGTGGAACCAAATGATACTGATCCATTAGATTCAAATGTAGCAAATCAGAAGCCCTTTGAGAGTGGAAGTGACAAAATCTCCAAGGAAGTTGTACCGTCTT	Assays designed by relax mode and have no off-target hits
BRCA2	BRCA2_17	chr13	32906677	32906859	ACACTGACGACATGGTTCTACATGTATCTGAAGTGGAACCAAATGA	TACGGTAGCAGAGACTTGGTCTTGCAATAGGGGTATTTTCTCCAT	183	42	TGTATCTGAAGTGGAACCAAATGATACTGATCCATTAGATTCAAATGTAGCAAATCAGAAGCCCTTTGAGAGTGGAAGTGACAAAATCTCCAAGGAAGTTGTACCGTCTTTGGCCTGTGAATGGTCTCAACTAACCCTTTCAGGTCTAAATGGAGCCCAGATGGAGAAAATACCCCTATTGCA	Assays designed by relax mode and have no off-target hits
BRCA2	BRCA2_18	chr13	32906777	32906973	ACACTGACGACATGGTTCTACAGTACCGTCTTTGGCCTGTGAATG	TACGGTAGCAGAGACTTGGTCTGGTAGGCTAGAAATACGTGGCAAA	197	39	GTACCGTCTTTGGCCTGTGAATGGTCTCAACTAACCCTTTCAGGTCTAAATGGAGCCCAGATGGAGAAAATACCCCTATTGCATATTTCTTCATGTGACCAAAATATTTCAGAAAAAGACCTATTAGACACAGAGAACAAAAGAAAGAAAGATTTTCTTACTTCAGAGAATTCTTTGCCACGTATTTCTAGCCTACC	Assays designed by relax mode and have no off-target hits
BRCA2	BRCA2_19	chr13	32906851	32907049	ACACTGACGACATGGTTCTACACCTATTGCATATTTCTTCATGTGACC	TACGGTAGCAGAGACTTGGTCTTGTATGAGATTCAAGATGCTGCT	199	34	CCTATTGCATATTTCTTCATGTGACCAAAATATTTCAGAAAAAGACCTATTAGACACAGAGAACAAAAGAAAGAAAGATTTTCTTACTTCAGAGAATTCTTTGCCACGTATTTCTAGCCTACCAAAATCAGAGAAGCCATTAAATGAGGAAACAGTGGTAAATAAGAGAGATGAAGAGCAGCATCTTGAATCTCATACA	Assays designed by relax mode and have no off-target hits
BRCA2	BRCA2_20	chr13	32906946	32907116	ACACTGACGACATGGTTCTACAATTCTTTGCCACGTATTTCTAGCC	TACGGTAGCAGAGACTTGGTCTTACCCTGAAATGAAGAAGCCACT	171	40	ATTCTTTGCCACGTATTTCTAGCCTACCAAAATCAGAGAAGCCATTAAATGAGGAAACAGTGGTAAATAAGAGAGATGAAGAGCAGCATCTTGAATCTCATACAGACTGCATTCTTGCAGTAAAGCAGGCAATATCTGGAACTTCTCCAGTGGCTTCTTCATTTCAGGGTA	Assays designed by relax mode and have no off-target hits
BRCA2	BRCA2_21	chr13	32907057	32907233	ACACTGACGACATGGTTCTACATTCTTGCAGTAAAGCAGGCAATA	TACGGTAGCAGAGACTTGGTCTGTCCACTTTCAGAGGCTTCAGTT	177	37	TTCTTGCAGTAAAGCAGGCAATATCTGGAACTTCTCCAGTGGCTTCTTCATTTCAGGGTATCAAAAAGTCTATATTCAGAATAAGAGAATCACCTAAAGAGACTTTCAATGCAAGTTTTTCAGGTCATATGACTGATCCAAACTTTAAAAAAGAAACTGAAGCCTCTGAAAGTGGAC	Assays designed by relax mode and have no off-target hits
BRCA2	BRCA2_22	chr13	32907091	32907270	ACACTGACGACATGGTTCTACATCCAGTGGCTTCTTCATTTCAGG	TACGGTAGCAGAGACTTGGTCTGAGTCCTCCTTCTGTGAGCAAAC	180	37	TCCAGTGGCTTCTTCATTTCAGGGTATCAAAAAGTCTATATTCAGAATAAGAGAATCACCTAAAGAGACTTTCAATGCAAGTTTTTCAGGTCATATGACTGATCCAAACTTTAAAAAAGAAACTGAAGCCTCTGAAAGTGGACTGGAAATACATACTGTTTGCTCACAGAAGGAGGACTC	Assays designed by relax mode and have no off-target hits
BRCA2	BRCA2_23	chr13	32907186	32907361	ACACTGACGACATGGTTCTACATGACTGATCCAAACTTTAAAAAAGAAACT	TACGGTAGCAGAGACTTGGTCTAGTGGATATTAAACCTGCATTCTTCA	176	40	TGACTGATCCAAACTTTAAAAAAGAAACTGAAGCCTCTGAAAGTGGACTGGAAATACATACTGTTTGCTCACAGAAGGAGGACTCCTTATGTCCAAATTTAATTGATAATGGAAGCTGGCCAGCCACCACCACACAGAATTCTGTAGCTTTGAAGAATGCAGGTTTAATATCCACT	Assays designed by relax mode and have no off-target hits
BRCA2	BRCA2_24	chr13	32907264	32907455	ACACTGACGACATGGTTCTACAAGGACTCCTTATGTCCAAATTTAATTGAT	TACGGTAGCAGAGACTTGGTCTTTAGTTCTGATTTTTGGTCTTTCGG	192	32	AGGACTCCTTATGTCCAAATTTAATTGATAATGGAAGCTGGCCAGCCACCACCACACAGAATTCTGTAGCTTTGAAGAATGCAGGTTTAATATCCACTTTGAAAAAGAAAACAAATAAGTTTATTTATGCTATACATGATGAAACATCTTATAAAGGAAAAAAAATACCGAAAGACCAAAAATCAGAACTAA	Assays designed by relax mode and have no off-target hits
BRCA2	BRCA2_25	chr13	32907328	32907512	ACACTGACGACATGGTTCTACATGTAGCTTTGAAGAATGCAGGTTT	TACGGTAGCAGAGACTTGGTCTTTGCAAATGTAAGTGGTGCTTCA	185	30	TGTAGCTTTGAAGAATGCAGGTTTAATATCCACTTTGAAAAAGAAAACAAATAAGTTTATTTATGCTATACATGATGAAACATCTTATAAAGGAAAAAAAATACCGAAAGACCAAAAATCAGAACTAATTAACTGTTCAGCCCAGTTTGAAGCAAATGCTTTTGAAGCACCACTTACATTTGCAA	Assays designed by relax mode and have no off-target hits
BRCA2	BRCA2_26	chr13	32907463	32907643	ACACTGACGACATGGTTCTACATTCAGCCCAGTTTGAAGCA	TACGGTAGCAGAGACTTGGTCTGATGATGCCTAAGATTAAATATAAGATATGAAGA	181	31	TTCAGCCCAGTTTGAAGCAAATGCTTTTGAAGCACCACTTACATTTGCAAATGCTGATTCAGGTACCTCTGTCTTTTTTTTTTTGTAAATAGTACATATAGTTTTATAGATGACGATTCCTTCTGTGTTTTTTTCTGCTTTTTAAAATCTTCATATCTTATATTTAATCTTAGGCATCATC	Assays designed by relax mode and have no off-target hits
BRCA2	BRCA2_27	chr13	32910305	32910494	ACACTGACGACATGGTTCTACAactgtgcccAAACACTACCTT	TACGGTAGCAGAGACTTGGTCTTCAGAATTGTCCCAAAAGAGCTA	190	33	actgtgcccAAACACTACCTTTTTAACTTAGTGAAAAATATTTAGTGAATGTGATTGATGGTACTTTAATTTTGTCACTTTGTGTTTTTATGTTTAGGTTTATTGCATTCTTCTGTGAAAAGAAGCTGTTCACAGAATGATTCTGAAGAACCAACTTTGTCCTTAACTAGCTCTTTTGGGACAATTCTGA	One primer sits in the repeat region
BRCA2	BRCA2_28	chr13	32910395	32910590	ACACTGACGACATGGTTCTACATGTTTAGGTTTATTGCATTCTTCTGTGA	TACGGTAGCAGAGACTTGGTCTACTGTAGTTTTTCCTTATTACATTTTGCT	196	32	TGTTTAGGTTTATTGCATTCTTCTGTGAAAAGAAGCTGTTCACAGAATGATTCTGAAGAACCAACTTTGTCCTTAACTAGCTCTTTTGGGACAATTCTGAGGAAATGTTCTAGAAATGAAACATGTTCTAATAATACAGTAATCTCTCAGGATCTTGATTATAAAGAAGCAAAATGTAATAAGGAAAAACTACAGT	Assays designed by relax mode and have no off-target hits
BRCA2	BRCA2_29	chr13	32910464	32910654	ACACTGACGACATGGTTCTACATCCTTAACTAGCTCTTTTGGGACA	TACGGTAGCAGAGACTTGGTCTGGATCATTTTCACACTGTCCTTCC	191	35	TCCTTAACTAGCTCTTTTGGGACAATTCTGAGGAAATGTTCTAGAAATGAAACATGTTCTAATAATACAGTAATCTCTCAGGATCTTGATTATAAAGAAGCAAAATGTAATAAGGAAAAACTACAGTTATTTATTACCCCAGAAGCTGATTCTCTGTCATGCCTGCAGGAAGGACAGTGTGAAAATGATCC
BRCA2	BRCA2_30	chr13	32910603	32910766	ACACTGACGACATGGTTCTACACAGAAGCTGATTCTCTGTCATGC	TACGGTAGCAGAGACTTGGTCTACTTTTCTGGGATTGAAAGTCAGTAT	164	40	CAGAAGCTGATTCTCTGTCATGCCTGCAGGAAGGACAGTGTGAAAATGATCCAAAAAGCAAAAAAGTTTCAGATATAAAAGAAGAGGTCTTGGCTGCAGCATGTCACCCAGTACAACATTCAAAAGTGGAATACAGTGATACTGACTTTCAATCCCAGAAAAGT	Assays designed by relax mode and have no off-target hits
BRCA2	BRCA2_31	chr13	32910671	32910842	ACACTGACGACATGGTTCTACATCAGATATAAAAGAAGAGGTCTTGGC	TACGGTAGCAGAGACTTGGTCTTGACTAGGTTTGACAGAACATCC	172	38	TCAGATATAAAAGAAGAGGTCTTGGCTGCAGCATGTCACCCAGTACAACATTCAAAAGTGGAATACAGTGATACTGACTTTCAATCCCAGAAAAGTCTTTTATATGATCATGAAAATGCCAGCACTCTTATTTTAACTCCTACTTCCAAGGATGTTCTGTCAAACCTAGTCA	Assays designed by relax mode and have no off-target hits
BRCA2	BRCA2_32	chr13	32910787	32910961	ACACTGACGACATGGTTCTACATGCCAGCACTCTTATTTTAACTCCT	TACGGTAGCAGAGACTTGGTCTAGCACATACATCTTGATTCTTTTCCA	175	35	TGCCAGCACTCTTATTTTAACTCCTACTTCCAAGGATGTTCTGTCAAACCTAGTCATGATTTCTAGAGGCAAAGAATCATACAAAATGTCAGACAAGCTCAAAGGTAACAATTATGAATCTGATGTTGAATTAACCAAAAATATTCCCATGGAAAAGAATCAAGATGTATGTGCT	Assays designed by relax mode and have no off-target hits
BRCA2	BRCA2_33	chr13	32910870	32911041	ACACTGACGACATGGTTCTACAAAATGTCAGACAAGCTCAAAGGT	TACGGTAGCAGAGACTTGGTCTTGTACCTTTCTTGAAGGTGATGCT	172	33	AAATGTCAGACAAGCTCAAAGGTAACAATTATGAATCTGATGTTGAATTAACCAAAAATATTCCCATGGAAAAGAATCAAGATGTATGTGCTTTAAATGAAAATTATAAAAACGTTGAGCTGTTGCCACCTGAAAAATACATGAGAGTAGCATCACCTTCAAGAAAGGTACA	Assays designed by relax mode and have no off-target hits
BRCA2	BRCA2_34	chr13	32910936	32911134	ACACTGACGACATGGTTCTACATGGAAAAGAATCAAGATGTATGTGCT	TACGGTAGCAGAGACTTGGTCTTCTTCAGAGTCTGGATTGACAGTTAT	199	32	TGGAAAAGAATCAAGATGTATGTGCTTTAAATGAAAATTATAAAAACGTTGAGCTGTTGCCACCTGAAAAATACATGAGAGTAGCATCACCTTCAAGAAAGGTACAATTCAACCAAAACACAAATCTAAGAGTAATCCAAAAAAATCAAGAAGAAACTACTTCAATTTCAAAAATAACTGTCAATCCAGACTCTGAAGA	Assays designed by relax mode and have no off-target hits
BRCA2	BRCA2_35	chr13	32911048	32911246	ACACTGACGACATGGTTCTACACCAAAACACAAATCTAAGAGTAATCCA	TACGGTAGCAGAGACTTGGTCTGTTTACACAAGTCAAGTCTGTTTCA	199	31	CCAAAACACAAATCTAAGAGTAATCCAAAAAAATCAAGAAGAAACTACTTCAATTTCAAAAATAACTGTCAATCCAGACTCTGAAGAACTTTTCTCAGACAATGAGAATAATTTTGTCTTCCAAGTAGCTAATGAAAGGAATAATCTTGCTTTAGGAAATACTAAGGAACTTCATGAAACAGACTTGACTTGTGTAAAC	Assays designed by relax mode and have no off-target hits
BRCA2	BRCA2_36	chr13	32911114	32911305	ACACTGACGACATGGTTCTACATGTCAATCCAGACTCTGAAGAACT	TACGGTAGCAGAGACTTGGTCTGCTTGTTTATCACCTGTGTCTCC	192	35	TGTCAATCCAGACTCTGAAGAACTTTTCTCAGACAATGAGAATAATTTTGTCTTCCAAGTAGCTAATGAAAGGAATAATCTTGCTTTAGGAAATACTAAGGAACTTCATGAAACAGACTTGACTTGTGTAAACGAACCCATTTTCAAGAACTCTACCATGGTTTTATATGGAGACACAGGTGATAAACAAGC	Assays designed by relax mode and have no off-target hits
BRCA2	BRCA2_37	chr13	32911227	32911397	ACACTGACGACATGGTTCTACACAGACTTGACTTGTGTAAACGAACC	TACGGTAGCAGAGACTTGGTCTGACCTAGAGTCATTTTTATATGCTGCTTT	171	36	CAGACTTGACTTGTGTAAACGAACCCATTTTCAAGAACTCTACCATGGTTTTATATGGAGACACAGGTGATAAACAAGCAACCCAAGTGTCAATTAAAAAAGATTTGGTTTATGTTCTTGCAGAGGAGAACAAAAATAGTGTAAAGCAGCATATAAAAATGACTCTAGGTC	Assays designed by relax mode and have no off-target hits
BRCA2	BRCA2_38	chr13	32911338	32911529	ACACTGACGACATGGTTCTACAATGTTCTTGCAGAGGAGAACAAA	TACGGTAGCAGAGACTTGGTCTAAGCTGTTCTGAAGCTACCTC	192	34	ATGTTCTTGCAGAGGAGAACAAAAATAGTGTAAAGCAGCATATAAAAATGACTCTAGGTCAAGATTTAAAATCGGACATCTCCTTGAATATAGATAAAATACCAGAAAAAAATAATGATTACATGAACAAATGGGCAGGACTCTTAGGTCCAATTTCAAATCACAGTTTTGGAGGTAGCTTCAGAACAGCTT	Assays designed by relax mode and have no off-target hits
BRCA2	BRCA2_39	chr13	32911416	32911569	ACACTGACGACATGGTTCTACATCTCCTTGAATATAGATAAAATACCAGAAAAAA	TACGGTAGCAGAGACTTGGTCTTTCTTAATGTTATGTTCAGAGAGCTTG	154	33	TCTCCTTGAATATAGATAAAATACCAGAAAAAAATAATGATTACATGAACAAATGGGCAGGACTCTTAGGTCCAATTTCAAATCACAGTTTTGGAGGTAGCTTCAGAACAGCTTCAAATAAGGAAATCAAGCTCTCTGAACATAACATTAAGAA	Assays designed by relax mode and have no off-target hits
BRCA2	BRCA2_40	chr13	32911509	32911679	ACACTGACGACATGGTTCTACAGAGGTAGCTTCAGAACAGCTTCA	TACGGTAGCAGAGACTTGGTCTGAGGCTTGCTCAGTTTCTTTTGATT	171	34	GAGGTAGCTTCAGAACAGCTTCAAATAAGGAAATCAAGCTCTCTGAACATAACATTAAGAAGAGCAAAATGTTCTTCAAAGATATTGAAGAACAATATCCTACTAGTTTAGCTTGTGTTGAAATTGTAAATACCTTGGCATTAGATAATCAAAAGAAACTGAGCAAGCCTC	Assays designed by relax mode and have no off-target hits
BRCA2	BRCA2_41	chr13	32911535	32911731	ACACTGACGACATGGTTCTACAAAGGAAATCAAGCTCTCTGAACA	TACGGTAGCAGAGACTTGGTCTTCAGAAACAACTACACTACTCTGTAAA	197	32	AAGGAAATCAAGCTCTCTGAACATAACATTAAGAAGAGCAAAATGTTCTTCAAAGATATTGAAGAACAATATCCTACTAGTTTAGCTTGTGTTGAAATTGTAAATACCTTGGCATTAGATAATCAAAAGAAACTGAGCAAGCCTCAGTCAATTAATACTGTATCTGCACATTTACAGAGTAGTGTAGTTGTTTCTGA	Assays designed by relax mode and have no off-target hits
BRCA2	BRCA2_42	chr13	32911651	32911821	ACACTGACGACATGGTTCTACAAGATAATCAAAAGAAACTGAGCAAGC	TACGGTAGCAGAGACTTGGTCTTCTGCCTTTTGGCTAGGTG	171	33	AGATAATCAAAAGAAACTGAGCAAGCCTCAGTCAATTAATACTGTATCTGCACATTTACAGAGTAGTGTAGTTGTTTCTGATTGTAAAAATAGTCATATAACCCCTCAGATGTTATTTTCCAAGCAGGATTTTAATTCAAACCATAATTTAACACCTAGCCAAAAGGCAGA	Assays designed by relax mode and have no off-target hits
BRCA2	BRCA2_43	chr13	32911752	32911942	ACACTGACGACATGGTTCTACACCCCTCAGATGTTATTTTCCAAGC	TACGGTAGCAGAGACTTGGTCTAGTCATCTGGTTTTCAGGCACTT	191	35	CCCCTCAGATGTTATTTTCCAAGCAGGATTTTAATTCAAACCATAATTTAACACCTAGCCAAAAGGCAGAAATTACAGAACTTTCTACTATATTAGAAGAATCAGGAAGTCAGTTTGAATTTACTCAGTTTAGAAAACCAAGCTACATATTGCAGAAGAGTACATTTGAAGTGCCTGAAAACCAGATGACT	Assays designed by relax mode and have no off-target hits
BRCA2	BRCA2_44	chr13	32911796	32911973	ACACTGACGACATGGTTCTACAAATTTAACACCTAGCCAAAAGGC	TACGGTAGCAGAGACTTGGTCTCTCTGCATTCCTCAGAAGTGGTC	178	35	AATTTAACACCTAGCCAAAAGGCAGAAATTACAGAACTTTCTACTATATTAGAAGAATCAGGAAGTCAGTTTGAATTTACTCAGTTTAGAAAACCAAGCTACATATTGCAGAAGAGTACATTTGAAGTGCCTGAAAACCAGATGACTATCTTAAAGACCACTTCTGAGGAATGCAGAG	Assays designed by relax mode and have no off-target hits
BRCA2	BRCA2_45	chr13	32911913	32912084	ACACTGACGACATGGTTCTACAACATTTGAAGTGCCTGAAAACCA	TACGGTAGCAGAGACTTGGTCTTTTTCAACAGGCCAGCAAACTTC	172	41	ACATTTGAAGTGCCTGAAAACCAGATGACTATCTTAAAGACCACTTCTGAGGAATGCAGAGATGCTGATCTTCATGTCATAATGAATGCCCCATCGATTGGTCAGGTAGACAGCAGCAAGCAATTTGAAGGTACAGTTGAAATTAAACGGAAGTTTGCTGGCCTGTTGAAAA	Assays designed by relax mode and have no off-target hits
BRCA2	BRCA2_46	chr13	32912025	32912218	ACACTGACGACATGGTTCTACAGCAGCAAGCAATTTGAAGGTACA	TACGGTAGCAGAGACTTGGTCTACTAAACAGTTTCACAGCTTTTTGC	194	38	GCAGCAAGCAATTTGAAGGTACAGTTGAAATTAAACGGAAGTTTGCTGGCCTGTTGAAAAATGACTGTAACAAAAGTGCTTCTGGTTATTTAACAGATGAAAATGAAGTGGGGTTTAGGGGCTTTTATTCTGCTCATGGCACAAAACTGAATGTTTCTACTGAAGCTCTGCAAAAAGCTGTGAAACTGTTTAGT	Assays designed by relax mode and have no off-target hits
BRCA2	BRCA2_47	chr13	32912129	32912305	ACACTGACGACATGGTTCTACAGAAGTGGGGTTTAGGGGCTTTTA	TACGGTAGCAGAGACTTGGTCTTGAAACAACAGAATCATGACATTTACTT	177	37	GAAGTGGGGTTTAGGGGCTTTTATTCTGCTCATGGCACAAAACTGAATGTTTCTACTGAAGCTCTGCAAAAAGCTGTGAAACTGTTTAGTGATATTGAGAATATTAGTGAGGAAACTTCTGCAGAGGTACATCCAATAAGTTTATCTTCAAGTAAATGTCATGATTCTGTTGTTTCA	Assays designed by relax mode and have no off-target hits
BRCA2	BRCA2_48	chr13	32912216	32912409	ACACTGACGACATGGTTCTACAAGTGATATTGAGAATATTAGTGAGGAAACT	TACGGTAGCAGAGACTTGGTCTACAAAAGTGCCAGTAGTCATTTCA	194	27	AGTGATATTGAGAATATTAGTGAGGAAACTTCTGCAGAGGTACATCCAATAAGTTTATCTTCAAGTAAATGTCATGATTCTGTTGTTTCAATGTTTAAGATAGAAAATCATAATGATAAAACTGTAAGTGAAAAAAATAATAAATGCCAACTGATATTACAAAATAATATTGAAATGACTACTGGCACTTTTGT	Assays designed by relax mode and have no off-target hits
BRCA2	BRCA2_49	chr13	32912285	32912479	ACACTGACGACATGGTTCTACATGTCATGATTCTGTTGTTTCAATGT	TACGGTAGCAGAGACTTGGTCTTCTACTGGCAGCAGTATATTTGTT	195	26	TGTCATGATTCTGTTGTTTCAATGTTTAAGATAGAAAATCATAATGATAAAACTGTAAGTGAAAAAAATAATAAATGCCAACTGATATTACAAAATAATATTGAAATGACTACTGGCACTTTTGTTGAAGAAATTACTGAAAATTACAAGAGAAATACTGAAAATGAAGATAACAAATATACTGCTGCCAGTAGA	Assays designed by relax mode and have no off-target hits
BRCA2	BRCA2_50	chr13	32912391	32912574	ACACTGACGACATGGTTCTACATGACTACTGGCACTTTTGTTGAAG	TACGGTAGCAGAGACTTGGTCTTGATCAGTAAATAGCAAGTCCGT	184	30	TGACTACTGGCACTTTTGTTGAAGAAATTACTGAAAATTACAAGAGAAATACTGAAAATGAAGATAACAAATATACTGCTGCCAGTAGAAATTCTCATAACTTAGAATTTGATGGCAGTGATTCAAGTAAAAATGATACTGTTTGTATTCATAAAGATGAAACGGACTTGCTATTTACTGATCA	Assays designed by relax mode and have no off-target hits
BRCA2	BRCA2_51	chr13	32912431	32912629	ACACTGACGACATGGTTCTACACAAGAGAAATACTGAAAATGAAGATAACAAAT	TACGGTAGCAGAGACTTGGTCTCTGAGTGTTTCCCTCCTTCATAA	199	33	CAAGAGAAATACTGAAAATGAAGATAACAAATATACTGCTGCCAGTAGAAATTCTCATAACTTAGAATTTGATGGCAGTGATTCAAGTAAAAATGATACTGTTTGTATTCATAAAGATGAAACGGACTTGCTATTTACTGATCAGCACAACATATGTCTTAAATTATCTGGCCAGTTTATGAAGGAGGGAAACACTCAG	Assays designed by relax mode and have no off-target hits
BRCA2	BRCA2_52	chr13	32912534	32912717	ACACTGACGACATGGTTCTACATGTATTCATAAAGATGAAACGGACTTG	TACGGTAGCAGAGACTTGGTCTACTGTTCTTTATTTGAAGTATTACCATGAC	184	34	TGTATTCATAAAGATGAAACGGACTTGCTATTTACTGATCAGCACAACATATGTCTTAAATTATCTGGCCAGTTTATGAAGGAGGGAAACACTCAGATTAAAGAAGATTTGTCAGATTTAACTTTTTTGGAAGTTGCGAAAGCTCAAGAAGCATGTCATGGTAATACTTCAAATAAAGAACAGT	Assays designed by relax mode and have no off-target hits
BRCA2	BRCA2_53	chr13	32912600	32912792	ACACTGACGACATGGTTCTACAGGCCAGTTTATGAAGGAGGGAAA	TACGGTAGCAGAGACTTGGTCTTCCCACTTGCAGTCTGAAAAAATG	193	35	GGCCAGTTTATGAAGGAGGGAAACACTCAGATTAAAGAAGATTTGTCAGATTTAACTTTTTTGGAAGTTGCGAAAGCTCAAGAAGCATGTCATGGTAATACTTCAAATAAAGAACAGTTAACTGCTACTAAAACGGAGCAAAATATAAAAGATTTTGAGACTTCTGATACATTTTTTCAGACTGCAAGTGGGA	Assays designed by relax mode and have no off-target hits
BRCA2	BRCA2_54	chr13	32912680	32912872	ACACTGACGACATGGTTCTACAAGAAGCATGTCATGGTAATACTTCAAA	TACGGTAGCAGAGACTTGGTCTAAAGTTATGCAATTCTTCTGGTTTCT	193	30	AGAAGCATGTCATGGTAATACTTCAAATAAAGAACAGTTAACTGCTACTAAAACGGAGCAAAATATAAAAGATTTTGAGACTTCTGATACATTTTTTCAGACTGCAAGTGGGAAAAATATTAGTGTCGCCAAAGAGTCATTTAATAAAATTGTAAATTTCTTTGATCAGAAACCAGAAGAATTGCATAACTTT	Assays designed by relax mode and have no off-target hits
BRCA2	BRCA2_55	chr13	32912788	32912986	ACACTGACGACATGGTTCTACATGGGAAAAATATTAGTGTCGCCAAAG	TACGGTAGCAGAGACTTGGTCTACCAACTGGGACACTTTCTTTCA	199	30	TGGGAAAAATATTAGTGTCGCCAAAGAGTCATTTAATAAAATTGTAAATTTCTTTGATCAGAAACCAGAAGAATTGCATAACTTTTCCTTAAATTCTGAATTACATTCTGACATAAGAAAGAACAAAATGGACATTCTAAGTTATGAGGAAACAGACATAGTTAAACACAAAATACTGAAAGAAAGTGTCCCAGTTGGT	Assays designed by relax mode and have no off-target hits
BRCA2	BRCA2_56	chr13	32912851	32913037	ACACTGACGACATGGTTCTACAACCAGAAGAATTGCATAACTTTTCCT	TACGGTAGCAGAGACTTGGTCTCTTTTCATCACGTTCGGGTTGTC	187	36	ACCAGAAGAATTGCATAACTTTTCCTTAAATTCTGAATTACATTCTGACATAAGAAAGAACAAAATGGACATTCTAAGTTATGAGGAAACAGACATAGTTAAACACAAAATACTGAAAGAAAGTGTCCCAGTTGGTACTGGAAATCAACTAGTGACCTTCCAGGGACAACCCGAACGTGATGAAAAG	Assays designed by relax mode and have no off-target hits
BRCA2	BRCA2_57	chr13	32912966	32913164	ACACTGACGACATGGTTCTACAAAAGAAAGTGTCCCAGTTGGT	TACGGTAGCAGAGACTTGGTCTTGGTGATTTCACTAGTACCTTGC	199	39	AAAGAAAGTGTCCCAGTTGGTACTGGAAATCAACTAGTGACCTTCCAGGGACAACCCGAACGTGATGAAAAGATCAAAGAACCTACTCTATTGGGTTTTCATACAGCTAGCGGGAAAAAAGTTAAAATTGCAAAGGAATCTTTGGACAAAGTGAAAAACCTTTTTGATGAAAAAGAGCAAGGTACTAGTGAAATCACCA	Assays designed by relax mode and have no off-target hits
BRCA2	BRCA2_58	chr13	32913064	32913248	ACACTGACGACATGGTTCTACATCATACAGCTAGCGGGAAAAAAGT	TACGGTAGCAGAGACTTGGTCTTGATCTCAATGGTCTCACATGCT	185	38	TCATACAGCTAGCGGGAAAAAAGTTAAAATTGCAAAGGAATCTTTGGACAAAGTGAAAAACCTTTTTGATGAAAAAGAGCAAGGTACTAGTGAAATCACCAGTTTTAGCCATCAATGGGCAAAGACCCTAAAGTACAGAGAGGCCTGTAAAGACCTTGAATTAGCATGTGAGACCATTGAGATCA	Assays designed by relax mode and have no off-target hits
BRCA2	BRCA2_59	chr13	32913185	32913382	ACACTGACGACATGGTTCTACAAAGACCCTAAAGTACAGAGAGGC	TACGGTAGCAGAGACTTGGTCTTGATGTTTTGAGATTTTCAGTTTGTCT	198	37	AAGACCCTAAAGTACAGAGAGGCCTGTAAAGACCTTGAATTAGCATGTGAGACCATTGAGATCACAGCTGCCCCAAAGTGTAAAGAAATGCAGAATTCTCTCAATAATGATAAAAACCTTGTTTCTATTGAGACTGTGGTGCCACCTAAGCTCTTAAGTGATAATTTATGTAGACAAACTGAAAATCTCAAAACATCA	Assays designed by relax mode and have no off-target hits
BRCA2	BRCA2_60	chr13	32913301	32913486	ACACTGACGACATGGTTCTACACCTTGTTTCTATTGAGACTGTGGTG	TACGGTAGCAGAGACTTGGTCTTCAATGACTGAATAAGGGGACTG	186	33	CCTTGTTTCTATTGAGACTGTGGTGCCACCTAAGCTCTTAAGTGATAATTTATGTAGACAAACTGAAAATCTCAAAACATCAAAAAGTATCTTTTTGAAAGTTAAAGTACATGAAAATGTAGAAAAAGAAACAGCAAAAAGTCCTGCAACTTGTTACACAAATCAGTCCCCTTATTCAGTCATTGA	Assays designed by relax mode and have no off-target hits
BRCA2	BRCA2_61	chr13	32913356	32913547	ACACTGACGACATGGTTCTACAAGACAAACTGAAAATCTCAAAACATCAAA	TACGGTAGCAGAGACTTGGTCTTGAAGTCTGACTCACAGAAGTTTTTC	192	32	AGACAAACTGAAAATCTCAAAACATCAAAAAGTATCTTTTTGAAAGTTAAAGTACATGAAAATGTAGAAAAAGAAACAGCAAAAAGTCCTGCAACTTGTTACACAAATCAGTCCCCTTATTCAGTCATTGAAAATTCAGCCTTAGCTTTTTACACAAGTTGTAGTAGAAAAACTTCTGTGAGTCAGACTTCA	Assays designed by relax mode and have no off-target hits
BRCA2	BRCA2_62	chr13	32913476	32913669	ACACTGACGACATGGTTCTACATCAGTCATTGAAAATTCAGCCTTAGC	TACGGTAGCAGAGACTTGGTCTTCAGCTATAGTACTGTTTGAATTATTTTCAT	194	31	TCAGTCATTGAAAATTCAGCCTTAGCTTTTTACACAAGTTGTAGTAGAAAAACTTCTGTGAGTCAGACTTCATTACTTGAAGCAAAAAAATGGCTTAGAGAAGGAATATTTGATGGTCAACCAGAAAGAATAAATACTGCAGATTATGTAGGAAATTATTTGTATGAAAATAATTCAAACAGTACTATAGCTGA	Assays designed by relax mode and have no off-target hits
BRCA2	BRCA2_63	chr13	32913566	32913759	ACACTGACGACATGGTTCTACATGGCTTAGAGAAGGAATATTTGATGGT	TACGGTAGCAGAGACTTGGTCTACCTCATCAGAATGGTAGGAATAGC	194	31	TGGCTTAGAGAAGGAATATTTGATGGTCAACCAGAAAGAATAAATACTGCAGATTATGTAGGAAATTATTTGTATGAAAATAATTCAAACAGTACTATAGCTGAAAATGACAAAAATCATCTCTCCGAAAAACAAGATACTTATTTAAGTAACAGTAGCATGTCTAACAGCTATTCCTACCATTCTGATGAGGT	Assays designed by relax mode and have no off-target hits
BRCA2	BRCA2_64	chr13	32913649	32913831	ACACTGACGACATGGTTCTACATTCAAACAGTACTATAGCTGAAAATGAC	TACGGTAGCAGAGACTTGGTCTTCAACATTCTTCAATACTGGCTCAA	183	32	TTCAAACAGTACTATAGCTGAAAATGACAAAAATCATCTCTCCGAAAAACAAGATACTTATTTAAGTAACAGTAGCATGTCTAACAGCTATTCCTACCATTCTGATGAGGTATATAATGATTCAGGATATCTCTCAAAAAATAAACTTGATTCTGGTATTGAGCCAGTATTGAAGAATGTTGA	Assays designed by relax mode and have no off-target hits
BRCA2	BRCA2_65	chr13	32913735	32913933	ACACTGACGACATGGTTCTACAGCTATTCCTACCATTCTGATGAGGT	TACGGTAGCAGAGACTTGGTCTACAAGTTCCTCAACGCAAATATC	199	32	GCTATTCCTACCATTCTGATGAGGTATATAATGATTCAGGATATCTCTCAAAAAATAAACTTGATTCTGGTATTGAGCCAGTATTGAAGAATGTTGAAGATCAAAAAAACACTAGTTTTTCCAAAGTAATATCCAATGTAAAAGATGCAAATGCATACCCACAAACTGTAAATGAAGATATTTGCGTTGAGGAACTTGT	Assays designed by relax mode and have no off-target hits
BRCA2	BRCA2_66	chr13	32913854	32914036	ACACTGACGACATGGTTCTACATCCAAAGTAATATCCAATGTAAAAGATGC	TACGGTAGCAGAGACTTGGTCTACTGGCTATCCTAAATGCAGGTG	183	36	TCCAAAGTAATATCCAATGTAAAAGATGCAAATGCATACCCACAAACTGTAAATGAAGATATTTGCGTTGAGGAACTTGTGACTAGCTCTTCACCCTGCAAAAATAAAAATGCAGCCATTAAATTGTCCATATCTAATAGTAATAATTTTGAGGTAGGGCCACCTGCATTTAGGATAGCCAGT	Assays designed by relax mode and have no off-target hits
BRCA2	BRCA2_67	chr13	32913964	32914149	ACACTGACGACATGGTTCTACATGCAGCCATTAAATTGTCCATATCT	TACGGTAGCAGAGACTTGGTCTTGGCAAATTTTTGATTTATTCTCGTTGTTT	186	32	TGCAGCCATTAAATTGTCCATATCTAATAGTAATAATTTTGAGGTAGGGCCACCTGCATTTAGGATAGCCAGTGGTAAAATCGTTTGTGTTTCACATGAAACAATTAAAAAAGTGAAAGACATATTTACAGACAGTTTCAGTAAAGTAATTAAGGAAAACAACGAGAATAAATCAAAAATTTGCCA	Assays designed by relax mode and have no off-target hits
BRCA2	BRCA2_68	chr13	32914091	32914275	ACACTGACGACATGGTTCTACAACAGACAGTTTCAGTAAAGTAATTAAGGA	TACGGTAGCAGAGACTTGGTCTTCTTCACTCTGAATGTCAGCAAA	185	35	ACAGACAGTTTCAGTAAAGTAATTAAGGAAAACAACGAGAATAAATCAAAAATTTGCCAAACGAAAATTATGGCAGGTTGTTACGAGGCATTGGATGATTCAGAGGATATTCTTCATAACTCTCTAGATAATGATGAATGTAGCACGCATTCACATAAGGTTTTTGCTGACATTCAGAGTGAAGA	Assays designed by relax mode and have no off-target hits
BRCA2	BRCA2_69	chr13	32914156	32914353	ACACTGACGACATGGTTCTACAAATTATGGCAGGTTGTTACGAGG	TACGGTAGCAGAGACTTGGTCTGTTTCCAAACTAACATCACAAGGT	198	34	AATTATGGCAGGTTGTTACGAGGCATTGGATGATTCAGAGGATATTCTTCATAACTCTCTAGATAATGATGAATGTAGCACGCATTCACATAAGGTTTTTGCTGACATTCAGAGTGAAGAAATTTTACAACATAACCAAAATATGTCTGGATTGGAGAAAGTTTCTAAAATATCACCTTGTGATGTTAGTTTGGAAAC	Assays designed by relax mode and have no off-target hits
BRCA2	BRCA2_70	chr13	32914255	32914448	ACACTGACGACATGGTTCTACATGCTGACATTCAGAGTGAAGAAA	TACGGTAGCAGAGACTTGGTCTCAGATTTTCCACTTGCTGTGCTAA	194	34	TGCTGACATTCAGAGTGAAGAAATTTTACAACATAACCAAAATATGTCTGGATTGGAGAAAGTTTCTAAAATATCACCTTGTGATGTTAGTTTGGAAACTTCAGATATATGTAAATGTAGTATAGGGAAGCTTCATAAGTCAGTCTCATCTGCAAATACTTGTGGGATTTTTAGCACAGCAAGTGGAAAATCTG	Assays designed by relax mode and have no off-target hits
BRCA2	BRCA2_71	chr13	32914397	32914568	ACACTGACGACATGGTTCTACAGTCTCATCTGCAAATACTTGTGGG	TACGGTAGCAGAGACTTGGTCTTGAGCTGGTCTGAATGTTCGTTA	172	37	GTCTCATCTGCAAATACTTGTGGGATTTTTAGCACAGCAAGTGGAAAATCTGTCCAGGTATCAGATGCTTCATTACAAAACGCAAGACAAGTGTTTTCTGAAATAGAAGATAGTACCAAGCAAGTCTTTTCCAAAGTATTGTTTAAAAGTAACGAACATTCAGACCAGCTCA	Assays designed by relax mode and have no off-target hits
BRCA2	BRCA2_72	chr13	32914478	32914674	ACACTGACGACATGGTTCTACAGCAAGACAAGTGTTTTCTGAAATAGAAG	TACGGTAGCAGAGACTTGGTCTGCTGTACTAAATCCAGAGAAAGCAGA	197	35	GCAAGACAAGTGTTTTCTGAAATAGAAGATAGTACCAAGCAAGTCTTTTCCAAAGTATTGTTTAAAAGTAACGAACATTCAGACCAGCTCACAAGAGAAGAAAATACTGCTATACGTACTCCAGAACATTTAATATCCCAAAAAGGCTTTTCATATAATGTGGTAAATTCATCTGCTTTCTCTGGATTTAGTACAGC	Assays designed by relax mode and have no off-target hits
BRCA2	BRCA2_73	chr13	32914546	32914737	ACACTGACGACATGGTTCTACATAACGAACATTCAGACCAGCTCA	TACGGTAGCAGAGACTTGGTCTTCCTCTAACACTCCCTTAACTTTGTG	192	36	TAACGAACATTCAGACCAGCTCACAAGAGAAGAAAATACTGCTATACGTACTCCAGAACATTTAATATCCCAAAAAGGCTTTTCATATAATGTGGTAAATTCATCTGCTTTCTCTGGATTTAGTACAGCAAGTGGAAAGCAAGTTTCCATTTTAGAAAGTTCCTTACACAAAGTTAAGGGAGTGTTAGAGGA	Assays designed by relax mode and have no off-target hits
BRCA2	BRCA2_74	chr13	32914658	32914834	ACACTGACGACATGGTTCTACATCTGGATTTAGTACAGCAAGTGGA	TACGGTAGCAGAGACTTGGTCTTGGGTTTCTCTTATCAACACGAGG	177	36	TCTGGATTTAGTACAGCAAGTGGAAAGCAAGTTTCCATTTTAGAAAGTTCCTTACACAAAGTTAAGGGAGTGTTAGAGGAATTTGATTTAATCAGAACTGAGCATAGTCTTCACTATTCACCTACGTCTAGACAAAATGTATCAAAAATACTTCCTCGTGTTGATAAGAGAAACCCA	Assays designed by relax mode and have no off-target hits
BRCA2	BRCA2_75	chr13	32914749	32914934	ACACTGACGACATGGTTCTACATCAGAACTGAGCATAGTCTTCACT	TACGGTAGCAGAGACTTGGTCTAGTGATTATTTTCTGAAGAACCACCTT	186	33	TCAGAACTGAGCATAGTCTTCACTATTCACCTACGTCTAGACAAAATGTATCAAAAATACTTCCTCGTGTTGATAAGAGAAACCCAGAGCACTGTGTAAACTCAGAAATGGAAAAAACCTGCAGTAAAGAATTTAAATTATCAAATAACTTAAATGTTGAAGGTGGTTCTTCAGAAAATAATCACT	Assays designed by relax mode and have no off-target hits
BRCA2	BRCA2_76	chr13	32914851	32915046	ACACTGACGACATGGTTCTACACAGAAATGGAAAAAACCTGCAGTA	TACGGTAGCAGAGACTTGGTCTGCCTGTTCTTTTCCCAAAACATGAA	196	32	CAGAAATGGAAAAAACCTGCAGTAAAGAATTTAAATTATCAAATAACTTAAATGTTGAAGGTGGTTCTTCAGAAAATAATCACTCTATTAAAGTTTCTCCATATCTCTCTCAATTTCAACAAGACAAACAACAGTTGGTATTAGGAACCAAAGTGTCACTTGTTGAGAACATTCATGTTTTGGGAAAAGAACAGGC	Assays designed by relax mode and have no off-target hits
BRCA2	BRCA2_77	chr13	32914958	32915151	ACACTGACGACATGGTTCTACATCTCAATTTCAACAAGACAAACAACA	TACGGTAGCAGAGACTTGGTCTTCTGAATCTTTGGAGTAAGTAGAACA	194	33	TCTCAATTTCAACAAGACAAACAACAGTTGGTATTAGGAACCAAAGTGTCACTTGTTGAGAACATTCATGTTTTGGGAAAAGAACAGGCTTCACCTAAAAACGTAAAAATGGAAATTGGTAAAACTGAAACTTTTTCTGATGTTCCTGTGAAAACAAATATAGAAGTTTGTTCTACTTACTCCAAAGATTCAGA	Assays designed by relax mode and have no off-target hits
BRCA2	BRCA2_78	chr13	32915045	32915243	ACACTGACGACATGGTTCTACAGCTTCACCTAAAAACGTAAAAATGGAA	TACGGTAGCAGAGACTTGGTCTGTGTGGCATGACTTGGCAGTTTA	199	34	GCTTCACCTAAAAACGTAAAAATGGAAATTGGTAAAACTGAAACTTTTTCTGATGTTCCTGTGAAAACAAATATAGAAGTTTGTTCTACTTACTCCAAAGATTCAGAAAACTACTTTGAAACAGAAGCAGTAGAAATTGCTAAAGCTTTTATGGAAGATGATGAACTGACAGATTCTAAACTGCCAAGTCATGCCACAC	Assays designed by relax mode and have no off-target hits
BRCA2	BRCA2_79	chr13	32915188	32915372	ACACTGACGACATGGTTCTACAAGCTTTTATGGAAGATGATGAACTGA	TACGGTAGCAGAGACTTGGTCTTAGTGATTGGCAACACGAAAGGT	185	38	AGCTTTTATGGAAGATGATGAACTGACAGATTCTAAACTGCCAAGTCATGCCACACATTCTCTTTTTACATGTCCCGAAAATGAGGAAATGGTTTTGTCAAATTCAAGAATTGGAAAAAGAAGAGGAGAGCCCCTTATCTTAGTGGGTAAGTGTTCATTTTTACCTTTCGTGTTGCCAATCACTA	Assays designed by relax mode and have no off-target hits
BRCA2	BRCA2_80	chr13	32918559	32918755	ACACTGACGACATGGTTCTACACACTATTTGTTGTAAGTATTTTTGTTTAACATTT	TACGGTAGCAGAGACTTGGTCTTCTTGATTTTCTATTATCCTGTCAAATTCAT	197	23	CACTATTTGTTGTAAGTATTTTTGTTTAACATTTAAAGAGTCAATACTTTAGCTTTAAAAAAATGGTCTATAGACTTTTGAGAAATAAAACTGATATTATTTGCCTTAAAAACATATATGAAATATTTCTTTTTAGGAGAACCCTCAATCAAAAGAAACTTATTAAATGAATTTGACAGGATAATAGAAAATCAAGA	Assays designed by relax mode and have no off-target hits
BRCA2	BRCA2_81	chr13	32918683	32918853	ACACTGACGACATGGTTCTACAATTTCTTTTTAGGAGAACCCTCAATCAA	TACGGTAGCAGAGACTTGGTCTGTCAGAATATTATATACCATACCTATAGAGGGAGA	171	29	ATTTCTTTTTAGGAGAACCCTCAATCAAAAGAAACTTATTAAATGAATTTGACAGGATAATAGAAAATCAAGAAAAATCCTTAAAGGCTTCAAAAAGCACTCCAGATGGTAAAATTAGCTTTTTATTTATATCTGTTCTCCCTCTATAGGTATGGTATATAATAttctgac	Assays designed by relax mode and have no off-target hits
BRCA2	BRCA2_83	chr13	32920895	32921044	ACACTGACGACATGGTTCTACAGTATTTACAGTAACATGGATATTCTCTTAGATTT	TACGGTAGCAGAGACTTGGTCTACATGTCTTACCGAAAGGGTACA	150	31	GTATTTACAGTAACATGGATATTCTCTTAGATTTTAACTAATATGTAATATAAAATAATTGTTTCCTAGGCACAATAAAAGATCGAAGATTGTTTATGCATCATGTTTCTTTAGAGCCGATTACCTGTGTACCCTTTCGGTAAGACATGT	Assays designed by relax mode and have no off-target hits
BRCA2	BRCA2_127	chr13	32920953	32921102	ACACTGACGACATGGTTCTACATTGTTTCCTAGGCACAATAAAAGA	TACGGTAGCAGAGACTTGGTCTTGTTCATTTATAAAAACGAGACTTTTC	150	31	TTGTTTCCTAGGCACAATAAAAGATCGAAGATTGTTTATGCATCATGTTTCTTTAGAGCCGATTACCTGTGTACCCTTTCGGTAAGACATGTTTAAATTTTTCTAAATTCTAATACAGTATGAGAAAAGTCTCGTTTTTATAAATGAACA
BRCA2	BRCA2_85	chr13	32928912	32929110	ACACTGACGACATGGTTCTACACAAATGAGGGTCTGCAACAAAGG	TACGGTAGCAGAGACTTGGTCTTGCTTGAAGATTTTTCCAAAGTCAG	199	35	CAAATGAGGGTCTGCAACAAAGGCATATTCCTAAATATTTATATGTGTACTAGTCAATAAACTTATATATTTTCTCCCCATTGCAGCACAACTAAGGAACGTCAAGAGATACAGAATCCAAATTTTACCGCACCTGGTCAAGAATTTCTGTCTAAATCTCATTTGTATGAACATCTGACTTTGGAAAAATCTTCAAGCA	Assays designed by relax mode and have no off-target hits
BRCA2	BRCA2_86	chr13	32928997	32929195	ACACTGACGACATGGTTCTACAGCACAACTAAGGAACGTCAAGAG	TACGGTAGCAGAGACTTGGTCTGGTCTGCCTGTAGTAATCAAGTG	199	36	GCACAACTAAGGAACGTCAAGAGATACAGAATCCAAATTTTACCGCACCTGGTCAAGAATTTCTGTCTAAATCTCATTTGTATGAACATCTGACTTTGGAAAAATCTTCAAGCAATTTAGCAGTTTCAGGACATCCATTTTATCAAGTTTCTGCTACAAGAAATGAAAAAATGAGACACTTGATTACTACAGGCAGACC	Assays designed by relax mode and have no off-target hits
BRCA2	BRCA2_87	chr13	32929113	32929288	ACACTGACGACATGGTTCTACATTAGCAGTTTCAGGACATCCATT	TACGGTAGCAGAGACTTGGTCTTGTCTGTTTTCCTCCAAGTTAATATTCC	176	35	TTAGCAGTTTCAGGACATCCATTTTATCAAGTTTCTGCTACAAGAAATGAAAAAATGAGACACTTGATTACTACAGGCAGACCAACCAAAGTCTTTGTTCCACCTTTTAAAACTAAATCACATTTTCACAGAGTTGAACAGTGTGTTAGGAATATTAACTTGGAGGAAAACAGACA
BRCA2	BRCA2_88	chr13	32929181	32929377	ACACTGACGACATGGTTCTACATACTACAGGCAGACCAACCAAAG	TACGGTAGCAGAGACTTGGTCTTGGAGTTGTTTTTGTTAAACTGATGA	197	34	TACTACAGGCAGACCAACCAAAGTCTTTGTTCCACCTTTTAAAACTAAATCACATTTTCACAGAGTTGAACAGTGTGTTAGGAATATTAACTTGGAGGAAAACAGACAAAAGCAAAACATTGATGGACATGGCTCTGATGATAGTAAAAATAAGATTAATGACAATGAGATTCATCAGTTTAACAAAAACAACTCCA	Assays designed by relax mode and have no off-target hits
BRCA2	BRCA2_89	chr13	32929315	32929467	ACACTGACGACATGGTTCTACACTGATGATAGTAAAAATAAGATTAATGACAATGAG	TACGGTAGCAGAGACTTGGTCTACTGAAAGGCAAAAATTCATCACACA	153	31	CTGATGATAGTAAAAATAAGATTAATGACAATGAGATTCATCAGTTTAACAAAAACAACTCCAATCAAGCAGTAGCTGTAACTTTCACAAAGTGTGAAGAAGAACCTTTAGGTATTGTATGACAATTTGTGTGATGAATTTTTGCCTTTCAGT
BRCA2	BRCA2_90	chr13	32930503	32930690	ACACTGACGACATGGTTCTACAGGCCAGGGGTTGTGCTTTTTA	TACGGTAGCAGAGACTTGGTCTTTCGAGGCAGAGTGGATGTTTTT	188	37	ggccAGGGGTTGTGCTTTTTAAATTTCAATTTTATTTTTGCTAAGTATTTATTCTTTGATAGATTTAATTACAAGTCTTCAGAATGCCAGAGATATACAGGATATGCGAATTAAGAAGAAACAAAGGCAACGCGTCTTTCCACAGCCAGGCAGTCTGTATCTTGCAAAAACATCCACTCTGCCTCGAA	Assays designed by relax mode and have no off-target hits
BRCA2	BRCA2_91	chr13	32930607	32930790	ACACTGACGACATGGTTCTACATGCGAATTAAGAAGAAACAAAGGC	TACGGTAGCAGAGACTTGGTCTACACTCTGTCATAAAAGCCATCAGT	184	45	TGCGAATTAAGAAGAAACAAAGGCAACGCGTCTTTCCACAGCCAGGCAGTCTGTATCTTGCAAAAACATCCACTCTGCCTCGAATCTCTCTGAAAGCAGCAGTAGGAGGCCAAGTTCCCTCTGCGTGTTCTCATAAACAGGTATGTGTTTGTCTACAATACTGATGGCTTTTATGACAGAGTGT	Assays designed by relax mode and have no off-target hits
BRCA2	BRCA2_92	chr13	32931809	32932007	ACACTGACGACATGGTTCTACATTGTTTTTATTGTGTGATACATGTTTACTTT	TACGGTAGCAGAGACTTGGTCTAGCCAACTGTATTCCTTTTCCAGT	199	30	TTGTTTTTATTGTGTGATACATGTTTACTTTAAATTGTTTTTCTTTTTTGTGTGTGTTTATTTTGTGTAGCTGTATACGTATGGCGTTTCTAAACATTGCATAAAAATTAACAGCAAAAATGCAGAGTCTTTTCAGTTTCACACTGAAGATTATTTTGGTAAGGAAAGTTTATGGACTGGAAAAGGAATACAGTTGGCT	Assays designed by relax mode and have no off-target hits
BRCA2	BRCA2_93	chr13	32931907	32932099	ACACTGACGACATGGTTCTACAGCATAAAAATTAACAGCAAAAATGCAG	TACGGTAGCAGAGACTTGGTCTAAAGTTAACACACAATCTTTTTGCATAG	193	36	GCATAAAAATTAACAGCAAAAATGCAGAGTCTTTTCAGTTTCACACTGAAGATTATTTTGGTAAGGAAAGTTTATGGACTGGAAAAGGAATACAGTTGGCTGATGGTGGATGGCTCATACCCTCCAATGATGGAAAGGCTGGAAAAGAAGAATTTTATAGGTACTCTATGCAAAAAGATTGTGTGTTAACTTT	Assays designed by relax mode and have no off-target hits
BRCA2	BRCA2_94	chr13	32936578	32936771	ACACTGACGACATGGTTCTACATGTACAGAGAATAGTTGTAGTTGTTGA	TACGGTAGCAGAGACTTGGTCTAGGAAAGGCACATTCCATAGCTG	194	36	TGTACAGAGAATAGTTGTAGTTGTTGAATTCAGTATCATCCTATGTGGTTTTTATGATAATATTCTACTTTTATTTGTTCAGGGCTCTGTGTGACACTCCAGGTGTGGATCCAAAGCTTATTTCTAGAATTTGGGTTTATAATCACTATAGATGGATCATATGGAAACTGGCAGCTATGGAATGTGCCTTTCCT	Assays designed by relax mode and have no off-target hits
BRCA2	BRCA2_95	chr13	32936661	32936831	ACACTGACGACATGGTTCTACAGCTCTGTGTGACACTCCAGGT	TACGGTAGCAGAGACTTGGTCTCCTGTATTTTAGTTGAAGAAGCACCC	171	41	GCTCTGTGTGACACTCCAGGTGTGGATCCAAAGCTTATTTCTAGAATTTGGGTTTATAATCACTATAGATGGATCATATGGAAACTGGCAGCTATGGAATGTGCCTTTCCTAAGGAATTTGCTAATAGATGCCTAAGCCCAGAAAGGGTGCTTCTTCAACTAAAATACAGG	Assays designed by relax mode and have no off-target hits
BRCA2	BRCA2_96	chr13	32936738	32936933	ACACTGACGACATGGTTCTACAATGGAAACTGGCAGCTATGGAAT	TACGGTAGCAGAGACTTGGTCTGACAACTGGCTTGTGCAACATTT	196	40	ATGGAAACTGGCAGCTATGGAATGTGCCTTTCCTAAGGAATTTGCTAATAGATGCCTAAGCCCAGAAAGGGTGCTTCTTCAACTAAAATACAGGCAAGTTTAAAGCATTACATTACGTAATCATATACGGCAGTATGGTTAAGGTTTCTGTGTAGTCTGTGACTTCCATGTCAAAATGTTGCACAAGCCAGTTGTC	Assays designed by relax mode and have no off-target hits
BRCA2	BRCA2_97	chr13	32937263	32937433	ACACTGACGACATGGTTCTACATGGAATTCTAGAGTCACACTTCCTAA	TACGGTAGCAGAGACTTGGTCTTGCGCTCAATGAAATTATGTCAGAAAC	171	35	TGGAATTCTAGAGTCACACTTCCTAAAATATGCATTTTTGTTTTCACTTTTAGATATGATACGGAAATTGATAGAAGCAGAAGATCGGCTATAAAAAAGATAATGGAAAGGGATGACACAGCTGCAAAAACACTTGTTCTCTGTGTTTCTGACATAATTTCATTGAGCGCA	Assays designed by relax mode and have no off-target hits
BRCA2	BRCA2_98	chr13	32937366	32937563	ACACTGACGACATGGTTCTACATGGAAAGGGATGACACAGC	TACGGTAGCAGAGACTTGGTCTTCTTTAAGACAGCTAAGAGGGGAG	198	40	TGGAAAGGGATGACACAGCTGCAAAAACACTTGTTCTCTGTGTTTCTGACATAATTTCATTGAGCGCAAATATATCTGAAACTTCTAGCAATAAAACTAGTAGTGCAGATACCCAAAAAGTGGCCATTATTGAACTTACAGATGGGTGGTATGCTGTTAAGGCCCAGTTAGATCCTCCCCTCTTAGCTGTCTTAAAGA	Assays designed by relax mode and have no off-target hits
BRCA2	BRCA2_99	chr13	32937465	32937648	ACACTGACGACATGGTTCTACAGTAGTGCAGATACCCAAAAAGTGG	TACGGTAGCAGAGACTTGGTCTGCTTCAAGAGGTGTACAGGCATC	184	47	GTAGTGCAGATACCCAAAAAGTGGCCATTATTGAACTTACAGATGGGTGGTATGCTGTTAAGGCCCAGTTAGATCCTCCCCTCTTAGCTGTCTTAAAGAATGGCAGACTGACAGTTGGTCAGAAGATTATTCTTCATGGAGCAGAACTGGTGGGCTCTCCTGATGCCTGTACACCTCTTGAAGC	Assays designed by relax mode and have no off-target hits
BRCA2	BRCA2_100	chr13	32937594	32937785	ACACTGACGACATGGTTCTACATTCTTCATGGAGCAGAACTGGTG	TACGGTAGCAGAGACTTGGTCTTCAGTACATCTAAGAAATTGAGCATCC	192	35	TTCTTCATGGAGCAGAACTGGTGGGCTCTCCTGATGCCTGTACACCTCTTGAAGCCCCAGAATCTCTTATGTTAAAGGTAAATTAATTTGCACTCTTGGTAAAAATCAGTCATTGATTCAGTTAAATTCTAGAAGTTTTACATTTAAATTTTAAATGCTTACTAAGGATGCTCAATTTCTTAGATGTACTGA
BRCA2	BRCA2_101	chr13	32944423	32944616	ACACTGACGACATGGTTCTACATTTTTAAAGTGAATATTTTTAAGGCAGTTCT	TACGGTAGCAGAGACTTGGTCTCAGAGGAAAAGGTCTAGGGTCAG	194	32	TTTTTAAAGTGAATATTTTTAAGGCAGTTCTAGAAGAATGAAAACTCTTATGATATCTGTAATAGAATTGAATACATATTTAACTACTAAATCAATATATTTATTAATTTGTCCAGATTTCTGCTAACAGTACTCGGCCTGCTCGCTGGTATACCAAACTTGGATTCTTTCCTGACCCTAGACCTTTTCCTCTG	Assays designed by relax mode and have no off-target hits
BRCA2	BRCA2_102	chr13	32944558	32944739	ACACTGACGACATGGTTCTACAGGCCTGCTCGCTGGTAT	TACGGTAGCAGAGACTTGGTCTATCAAAAGAAAGAAATATATGGTAAGTTTCAAG	182	39	GGCCTGCTCGCTGGTATACCAAACTTGGATTCTTTCCTGACCCTAGACCTTTTCCTCTGCCCTTATCATCGCTTTTCAGTGATGGAGGAAATGTTGGTTGTGTTGATGTAATTATTCAAAGAGCATACCCTATACAGGTATGATGTATTCTTGAAACTTACCATATATTTCTTTCTTTTGAT	Assays designed by relax mode and have no off-target hits
BRCA2	BRCA2_103	chr13	32945018	32945192	ACACTGACGACATGGTTCTACACTGTGCCTGGCCTGATACAATTA	TACGGTAGCAGAGACTTGGTCTCTAGTCTCTTTTGTTGGGCCTCC	175	38	ctgtgcctggccTGATACAATTAACTTGAATGTTATATATGTGACTTTTTTGGTGTGTGTAACACATTATTACAGTGGATGGAGAAGACATCATCTGGATTATACATATTTCGCAATGAAAGAGAGGAAGAAAAGGAAGCAGCAAAATATGTGGAGGCCCAACAAAAGAGACTAG	Assays designed by relax mode and have no off-target hits
BRCA2	BRCA2_104	chr13	32945088	32945279	ACACTGACGACATGGTTCTACATACAGTGGATGGAGAAGACATCA	TACGGTAGCAGAGACTTGGTCTTCATATTAGAAATAACAATGTGTACCATATAACT	192	34	TACAGTGGATGGAGAAGACATCATCTGGATTATACATATTTCGCAATGAAAGAGAGGAAGAAAAGGAAGCAGCAAAATATGTGGAGGCCCAACAAAAGAGACTAGAAGCCTTATTCACTAAAATTCAGGAGGAATTTGAAGAACATGAAGGTAAAATTAGTTATATGGTACACATTGTTATTTCTAATATGA	Assays designed by relax mode and have no off-target hits
BRCA2	BRCA2_105	chr13	32950735	32950927	ACACTGACGACATGGTTCTACATGCTTGGTTCTTTAGTTTTAGTTGCT	TACGGTAGCAGAGACTTGGTCTTCAAGGTAAGCTGGGTCTGC	193	37	TGCTTGGTTCTTTAGTTTTAGTTGCTTTTGAATTTACAGTTTAGTGAATTAATAATCCTTTTGTTTTCTTAGAAAACACAACAAAACCATATTTACCATCACGTGCACTAACAAGACAGCAAGTTCGTGCTTTGCAAGATGGTGCAGAGCTTTATGAAGCAGTGAAGAATGCAGCAGACCCAGCTTACCTTGA
BRCA2	BRCA2_106	chr13	32950838	32951010	ACACTGACGACATGGTTCTACATGCACTAACAAGACAGCAAGTTC	TACGGTAGCAGAGACTTGGTCTCCTGTGATGGCCAGAGAGTCTAA	173	45	TGCACTAACAAGACAGCAAGTTCGTGCTTTGCAAGATGGTGCAGAGCTTTATGAAGCAGTGAAGAATGCAGCAGACCCAGCTTACCTTGAGGTGAGAGAGTAAGAGGACATATAATGAGGCTTGATGATTATTCAAGGTGAGAAGCTGTTTTAGACTCTCTGGCCATCACAGG	Assays designed by relax mode and have no off-target hits
BRCA2	BRCA2_107	chr13	32953398	32953576	ACACTGACGACATGGTTCTACAAGATGGAACTTTTTTGTTCTGATTGC	TACGGTAGCAGAGACTTGGTCTTTCCTTTTGTTCAGCAGATTCCA	179	36	AGATGGAACTTTTTTGTTCTGATTGCTTTTTATTCCAATATCTTAAATGGTCACAGGGTTATTTCAGTGAAGAGCAGTTAAGAGCCTTGAATAATCACAGGCAAATGTTGAATGATAAGAAACAAGCTCAGATCCAGTTGGAAATTAGGAAGGCCATGGAATCTGCTGAACAAAAGGAA
BRCA2	BRCA2_108	chr13	32953496	32953694	ACACTGACGACATGGTTCTACAAGGCAAATGTTGAATGATAAGAAACA	TACGGTAGCAGAGACTTGGTCTAAGTTAATAAAACTGATAAAAACAAAGCATTTAC	199	35	AGGCAAATGTTGAATGATAAGAAACAAGCTCAGATCCAGTTGGAAATTAGGAAGGCCATGGAATCTGCTGAACAAAAGGAACAAGGTTTATCAAGGGATGTCACAACCGTGTGGAAGTTGCGTATTGTAAGCTATTCAAAAAAAGAAAAAGATTCAGGTAAGTATGTAAATGCTTTGTTTTTATCAGTTTTATTAACTT	Assays designed by relax mode and have no off-target hits
BRCA2	BRCA2_109	chr13	32953847	32954025	ACACTGACGACATGGTTCTACACACTTCTTCCATTGCATCTTTCTCA	TACGGTAGCAGAGACTTGGTCTTTTGTCGCTGCTAACTGTATGTT	179	34	CACTTCTTCCATTGCATCTTTCTCATCTTTCTCCAAACAGTTATACTGAGTATTTGGCGTCCATCATCAGATTTATATTCTCTGTTAACAGAAGGAAAGAGATACAGAATTTATCATCTTGCAACTTCAAAATCTAAAAGTAAATCTGAAAGAGCTAACATACAGTTAGCAGCGACAAA	Assays designed by relax mode and have no off-target hits
BRCA2	BRCA2_110	chr13	32953901	32954099	ACACTGACGACATGGTTCTACATGGCGTCCATCATCAGATTTATATTC	TACGGTAGCAGAGACTTGGTCTACTAACAAGCACTTATCAAAACTGAAA	199	33	TGGCGTCCATCATCAGATTTATATTCTCTGTTAACAGAAGGAAAGAGATACAGAATTTATCATCTTGCAACTTCAAAATCTAAAAGTAAATCTGAAAGAGCTAACATACAGTTAGCAGCGACAAAAAAAACTCAGTATCAACAACTACCGGTACAAACCTTTCATTGTAATTTTTCAGTTTTGATAAGTGCTTGTTAGT	Assays designed by relax mode and have no off-target hits
BRCA2	BRCA2_111	chr13	32954047	32954235	ACACTGACGACATGGTTCTACAACCGGTACAAACCTTTCATTGT	TACGGTAGCAGAGACTTGGTCTGAACAAGATGGCTGAAAGTCTGG	189	35	ACCGGTACAAACCTTTCATTGTAATTTTTCAGTTTTGATAAGTGCTTGTTAGTTTATGGAATCTCCATATGTTGAATTTTTGTTTTGTTTTCTGTAGGTTTCAGATGAAATTTTATTTCAGATTTACCAGCCACGGGAGCCCCTTCACTTCAGCAAATTTTTAGATCCAGACTTTCAGCCATCTTGTTC	Assays designed by relax mode and have no off-target hits
BRCA2	BRCA2_112	chr13	32954171	32954369	ACACTGACGACATGGTTCTACATACCAGCCACGGGAGCC	TACGGTAGCAGAGACTTGGTCTTGGTAGCTCCAACTAATCATAAGAGA	199	35	TACCAGCCACGGGAGCCCCTTCACTTCAGCAAATTTTTAGATCCAGACTTTCAGCCATCTTGTTCTGAGGTGGACCTAATAGGATTTGTCGTTTCTGTTGTGAAAAAAACAGGTAATGCACAATATAGTTAATTTTTTTTATTGATTCTTTTAAAAAACATTGTCTTTTAAAATCTCTTATGATTAGTTGGAGCTACCA	Assays designed by relax mode and have no off-target hits
BRCA2	BRCA2_Intron_24__region_1__1	chr13	32955429	32955627	ACACTGACGACATGGTTCTACAGGGGAGGGAGATTACAAACAAAG	TACGGTAGCAGAGACTTGGTCTACCTCACTCCCTCAATTCCTTCA	199	40	ggggagggagattacaaacaaagaaataagtaatatacatgtgtatagtttttttagtgctcagaaaaaaaattaagtgggtaagggggtaatgtcagagaagagagagggatgtaattttagattgagaggtgaggagagagacctccctggaaagctgacatttgagtgaagcttgaaggaattgagggagtgaggt	Two primers sits in the repeat region
BRCA2	BRCA2_Intron_24__region_1__2	chr13	32955521	32955716	ACACTGACGACATGGTTCTACATGTCAGAGAAGAGAGAGGGATGT	TACGGTAGCAGAGACTTGGTCTCAATGCTTCACGGCACACTAGG	196	49	tgtcagagaagagagagggatgtaattttagattgagaggtgaggagagagacctccctggaaagctgacatttgagtgaagcttgaaggaattgagggagtgaggtgaggcatgtggccatctggggaaagctttccaggcaattacaaaggccgcagtacagcaggatcatgcctagtgtgccgtgaagcattg	Two primers sits in the repeat region
BRCA2	BRCA2_Intron_24__region_1__3	chr13	32955600	32955779	ACACTGACGACATGGTTCTACAAAGCTTGAAGGAATTGAGGGAGT	TACGGTAGCAGAGACTTGGTCTCACACGACCTGGCTCTTCAC	180	53	aagcttgaaggaattgagggagtgaggtgaggcatgtggccatctggggaaagctttccaggcaattacaaaggccgcagtacagcaggatcatgcctagtgtgccgtgaagcattggcagagaccagagagtgagaagtaacatccagggacagaggcagtgaagagccaggtcgtgtg	Two primers sits in the repeat region
BRCA2	BRCA2_Intron_24__region_1__4	chr13	32955731	32955909	ACACTGACGACATGGTTCTACAGTGAGAAGTAACATCCAGGGACA	TACGGTAGCAGAGACTTGGTCTCCCCTACAGCCTATTCTCAACAC	179	51	gtgagaagtaacatccagggacagaggcagtgaagagccaggtcgtgtgggggtccttgtgtggactgtaacttcctgtgatgacaggaagtcacaggaaaattccaggtagagggacactgtctgacaggttttcacagaatcattcaggccactgtgttgagaataggctgtagggg	Two primers sits in the repeat region
BRCA2	BRCA2_Intron_24__region_1__5	chr13	32955824	32956006	ACACTGACGACATGGTTCTACAACAGGAAAATTCCAGGTAGAGGG	TACGGTAGCAGAGACTTGGTCTGACTGCTTCTCACCACTTCCATT	183	45	acaggaaaattccaggtagagggacactgtctgacaggttttcacagaatcattcaggccactgtgttgagaataggctgtagggggcacaagagtacaaacaagccatttggaggctctttcaagcacttaggcaaaagatgatgaaccaaacaaaagcaatggaagtggtgagaagcagtc	Two primers sits in the repeat region
BRCA2	BRCA2_Intron_24__region_1__6	chr13	32955922	32956107	ACACTGACGACATGGTTCTACAAAACAAGCCATTTGGAGGCTCTT	TACGGTAGCAGAGACTTGGTCTTGCTTTTCTTGCAGTCTTTCCTT	186	42	aaacaagccatttggaggctctttcaagcacttaggcaaaagatgatgaaccaaacaaaagcaatggaagtggtgagaagcagtcagattcttgttgtattttgaaggtagggggacggtgcaggatggtctgaacattgggaaaaatggaattgccacttagaaggaaagactgcaagaaaagca	Two primers sits in the repeat region
BRCA2	BRCA2_Intron_24__region_1__7	chr13	32956034	32956227	ACACTGACGACATGGTTCTACAGGGACGGTGCAGGATGG	TACGGTAGCAGAGACTTGGTCTCCAGCCATTCCTCTGAACAGATT	194	42	gggacggtgcaggatggtctgaacattgggaaaaatggaattgccacttagaaggaaagactgcaagaaaagcaagtatgtggggaagttcaggagctcagttttagacagttaagttttagatgcttattaggcatctaagtagaaatgtctacttgatggttacataggaatctgttcagaggaatggctgg	Two primers sits in the repeat region
BRCA2	BRCA2_Intron_24__region_2__1	chr13	32958725	32958923	ACACTGACGACATGGTTCTACAAAGTGAGGAGGCCTAGATGTCAG	TACGGTAGCAGAGACTTGGTCTTCTGGTCCAAGACTCTGTTTTCC	199	43	AAGTGAGGAGGCCTAGATGTCAGAGGAGTCCGGCTAAACCACTGCAGAACTGCTGCCTAATTCACAGCAACCATGAGTAAAAATGCTGATGATCATCAGGTCAAGGATAGTCTGGAGCAGTTAAGATGTTACTTTACATGGGAGGTATCAATTAAAGATGATGAAATGCCTGATTTGGAAAACAGAGTCTTGGACCAGA
BRCA2	BRCA2_Intron_24__region_2__2	chr13	32958830	32959024	ACACTGACGACATGGTTCTACAGATAGTCTGGAGCAGTTAAGATGT	TACGGTAGCAGAGACTTGGTCTAGTTCTCCAGCACTTCCTCATTC	195	41	GATAGTCTGGAGCAGTTAAGATGTTACTTTACATGGGAGGTATCAATTAAAGATGATGAAATGCCTGATTTGGAAAACAGAGTCTTGGACCAGATTGGGTTTCTAGACTAAATACAGTGTGGGAATACACAATACACAACCTACTAGCCTATGTGAAACACCCGAAAGGCCAGAATGAGGAAGTGCTGGAGAACT
BRCA2	BRCA2_Intron_24__region_2__3	chr13	32958974	32959172	ACACTGACGACATGGTTCTACATAGCCTATGTGAAACACCCGAAA	TACGGTAGCAGAGACTTGGTCTGCAAATGTTCTCTACCTTGTCCA	199	47	TAGCCTATGTGAAACACCCGAAAGGCCAGAATGAGGAAGTGCTGGAGAACTTGAAAGAAGCTGAAGACTTAATCCAGAAAGAAGATGCCAATCAGATTTGAGAAGCCTGGTAACCTGGGGCAACTTTGCCTGGGTGTATTACCACATGGGCAGACTGGCAGAAACCCAGACTTACCTGGACAAGGTAGAGAACATTTGC
BRCA2	BRCA2_Intron_24__region_2__4	chr13	32959058	32959234	ACACTGACGACATGGTTCTACAATGCCAATCAGATTTGAGAAGCC	TACGGTAGCAGAGACTTGGTCTTCTTCCTCACAGTCCATCTCTGG	177	47	ATGCCAATCAGATTTGAGAAGCCTGGTAACCTGGGGCAACTTTGCCTGGGTGTATTACCACATGGGCAGACTGGCAGAAACCCAGACTTACCTGGACAAGGTAGAGAACATTTGCAAGAAGTTTTCAAGTCCTTTCTGTCACAGAATGGAATGTCCAGAGATGGACTGTGAGGAAGA
BRCA2	BRCA2_Intron_24__region_2__5	chr13	32959147	32959333	ACACTGACGACATGGTTCTACAACCTGGACAAGGTAGAGAACATT	TACGGTAGCAGAGACTTGGTCTGTGTTGAGTTCAGGGTTTTCAGC	187	48	ACCTGGACAAGGTAGAGAACATTTGCAAGAAGTTTTCAAGTCCTTTCTGTCACAGAATGGAATGTCCAGAGATGGACTGTGAGGAAGAACGGGCCTTGCTGGAATGTGGAGGGAAGAATTATGAACAGGCCAAGGCCTGCTTTGAAAAGGATCTGGCAGTGGCTGCTGAAAACCCTGAACTCAACAC
BRCA2	BRCA2_Intron_24__region_2__6	chr13	32959205	32959401	ACACTGACGACATGGTTCTACAGGAATGTCCAGAGATGGACTGTG	TACGGTAGCAGAGACTTGGTCTAAAATGACTTGTGATCCCCCGTT	197	50	GGAATGTCCAGAGATGGACTGTGAGGAAGAACGGGCCTTGCTGGAATGTGGAGGGAAGAATTATGAACAGGCCAAGGCCTGCTTTGAAAAGGATCTGGCAGTGGCTGCTGAAAACCCTGAACTCAACACTGGGTATGAAATCACCGCCTGTCGCCTGGATGGCTTTAAATTAGCAACGGGGGATCACAAGTCATTTT
BRCA2	BRCA2_Intron_24__region_2__7	chr13	32959311	32959504	ACACTGACGACATGGTTCTACAGCTGAAAACCCTGAACTCAACAC	TACGGTAGCAGAGACTTGGTCTCCTTCAGCTTCCTGTCCTTCATC	194	47	GCTGAAAACCCTGAACTCAACACTGGGTATGAAATCACCGCCTGTCGCCTGGATGGCTTTAAATTAGCAACGGGGGATCACAAGTCATTTTCTTTGCCTACCCTAAGGCAGGCTGTCAGGCTAAATGTAGATGATAGATATAGTAAGGTTCTTCTTGCCCTGAAGCTTTGGGATGAAGGACAGGAAGCTGAAGG
BRCA2	BRCA2_Intron_24__region_3__1	chr13	32964498	32964682	ACACTGACGACATGGTTCTACAGCGGCTCGCAAGGCTA	TACGGTAGCAGAGACTTGGTCTACAAAGAAGATTTTTAAAGGTAGGAAGCA	185	32	gcggctcgcaaggctaggagtttgggacaagtctgggcaacagtgagattctgtctctataaacataaaaaCTAAATTTAAAAAAAAAACTACTTTAAAACATAATAATAAAACAAACTGTACAAGTTCATATTCCTGATGCATGATAACATTTAAtgcttcctacctttaaaaatcttctttgt	Assays designed by relax mode and have no off-target hits
BRCA2	BRCA2_Intron_24__region_3__2	chr13	32964614	32964772	ACACTGACGACATGGTTCTACAACTGTACAAGTTCATATTCCTGATGC	TACGGTAGCAGAGACTTGGTCTAAGCATCTGACTAGGGAGGTAAT	159	35	ACTGTACAAGTTCATATTCCTGATGCATGATAACATTTAAtgcttcctacctttaaaaatcttctttgttttgcatagatgctcttttgttctccccctcttgatgaatttgtcctattcattattcagctcaagtattacctccctagtcagatgctt	One primer sits in the repeat region
BRCA2	BRCA2_Intron_24__region_3__3	chr13	32964707	32964900	ACACTGACGACATGGTTCTACACCCCCTCTTGATGAATTTGTCCT	TACGGTAGCAGAGACTTGGTCTACTGAGGCTAGTAGGTGGCTTAT	194	44	ccccctcttgatgaatttgtcctattcattattcagctcaagtattacctccctagtcagatgcttacagtctgggttagatcctccttcctccagcttttgaagcattttgttggtttggctgtttcagcacttgtcacatggtccatgatcctacctgtacacttctgaataagccacctactagcctcagt	Two primers sits in the repeat region
BRCA2	BRCA2_Intron_24__region_3__4	chr13	32964809	32965000	ACACTGACGACATGGTTCTACAAAGCATTTTGTTGGTTTGGCTGT	TACGGTAGCAGAGACTTGGTCTCCTGGAGTTTTCAACAACTGACC	192	44	aagcattttgttggtttggctgtttcagcacttgtcacatggtccatgatcctacctgtacacttctgaataagccacctactagcctcagtaatacaatgatctcttcaaggacagggactctgtttGGATTTCTACTTCCACTTCTGACATAATGGGTTGAAGCAGGGGTCAGTTGTTGAAAACTCCAGG	One primer sits in the repeat region
BRCA2	BRCA2_Intron_24__region_3__5	chr13	32964908	32965094	ACACTGACGACATGGTTCTACATGATCTCTTCAAGGACAGGGACT	TACGGTAGCAGAGACTTGGTCTTAACCTCTCTGAGCTCCAGTTTC	187	44	tgatctcttcaaggacagggactctgtttGGATTTCTACTTCCACTTCTGACATAATGGGTTGAAGCAGGGGTCAGTTGTTGAAAACTCCAGGTatgcagcatctcatacggtcctcatagtcacactgttcatttgctattatcatcccactttacagatggggaaactggagctcagagaggtta	Two primers sits in the repeat region
BRCA2	BRCA2_Intron_24__region_3__6	chr13	32965017	32965207	ACACTGACGACATGGTTCTACACGGTCCTCATAGTCACACTGTTC	TACGGTAGCAGAGACTTGGTCTTGAGTTTGCTTTTGTTTTGTCAGC	191	40	cggtcctcatagtcacactgttcatttgctattatcatcccactttacagatggggaaactggagctcagagaggttaagtagcctgctcagggtcacaatgctataaattgatttgaacttatactttcaggccctaaagctcttaggttctttcttatacttcatgctgACAAAACAAAAGCAAACTCA	Two primers sits in the repeat region
BRCA2	BRCA2_Intron_24__region_3__7	chr13	32965060	32965244	ACACTGACGACATGGTTCTACATTTACAGATGGGGAAACTGGAGC	TACGGTAGCAGAGACTTGGTCTTACAGATGTCCCTGTTTTAAGCC	185	39	tttacagatggggaaactggagctcagagaggttaagtagcctgctcagggtcacaatgctataaattgatttgaacttatactttcaggccctaaagctcttaggttctttcttatacttcatgctgACAAAACAAAAGCAAACTCAACATTTGAGAGTTGGGCTTAAAACAGGGACATCTGTA	One primer sits in the repeat region
BRCA2	BRCA2_Intron_24__region_3__8	chr13	32965183	32965359	ACACTGACGACATGGTTCTACAtgctgACAAAACAAAAGCAAACT	TACGGTAGCAGAGACTTGGTCTgaaACAGGCTTTCCCCAAAACAA	177	34	tgctgACAAAACAAAAGCAAACTCAACATTTGAGAGTTGGGCTTAAAACAGGGACATCTGTATTTTTAATCTAATGCTTTGTTACTGTATTACAGAAACACTGTGATATATAATGAGTTAATTAAACGAGAACCTTTCTTAGGTTGGGAAAGATTTGTTTTGGGGAAAGCCTGTttc	Two primers sits in the repeat region
BRCA2	BRCA2_Intron_24__region_3__9	chr13	32965220	32965418	ACACTGACGACATGGTTCTACATGGGCTTAAAACAGGGACATCTG	TACGGTAGCAGAGACTTGGTCTGCTGTTCCTAAGGGCATTTTCTA	199	36	TGGGCTTAAAACAGGGACATCTGTATTTTTAATCTAATGCTTTGTTACTGTATTACAGAAACACTGTGATATATAATGAGTTAATTAAACGAGAACCTTTCTTAGGTTGGGAAAGATTTGTTTTGGGGAAAGCCTGTttccctgggaaacagacttacagatttcatgtaggagattagaaaatgcccttaggaacagc	One primer sits in the repeat region
BRCA2	BRCA2_Intron_24__region_3__10	chr13	32965331	32965527	ACACTGACGACATGGTTCTACAAAAGATTTGTTTTGGGGAAAGCC	TACGGTAGCAGAGACTTGGTCTCAGGCTAGCAAGACTCTGAAGG	197	47	AAAGATTTGTTTTGGGGAAAGCCTGTttccctgggaaacagacttacagatttcatgtaggagattagaaaatgcccttaggaacagcacttgtgaggaagcaaatgcagcaggattgggcagaagaagaagaaaggttcagttagtcccacagggacttctggagctgggtggcccttcagagtcttgctagcctg	One primer sits in the repeat region
BRCA2	BRCA2_Intron_24__region_3__11	chr13	32965437	32965630	ACACTGACGACATGGTTCTACAGCAGCAGGATTGGGCAGAAG	TACGGTAGCAGAGACTTGGTCTCTCTGAGTTCCCTCCTGGACTTG	194	56	gcagcaggattgggcagaagaagaagaaaggttcagttagtcccacagggacttctggagctgggtggcccttcagagtcttgctagcctgaggcaagagccagtccttgcatactggctcctccagggaggggcatagccttaagcaagacaatgcctttcgacagagggcaagtccaggagggaactcagag	Two primers sits in the repeat region
BRCA2	BRCA2_Intron_24__region_3__12	chr13	32965531	32965725	ACACTGACGACATGGTTCTACACAAGAGCCAGTCCTTGCATACT	TACGGTAGCAGAGACTTGGTCTCTGGAGTGGATGCCATGGTG	195	56	caagagccagtccttgcatactggctcctccagggaggggcatagccttaagcaagacaatgcctttcgacagagggcaagtccaggagggaactcagaggtgagttgtcaatagctagctctccccagaagctggaggatcacatgccttggtcctgaaggggatctgcacccgcaccatggcatccacTCCAG	Two primers sits in the repeat region
BRCA2	BRCA2_Intron_24__region_3__13	chr13	32965663	32965858	ACACTGACGACATGGTTCTACACTGGAGGATCACATGCCTTGG	TACGGTAGCAGAGACTTGGTCTTATTTTGCAGCTTTGTGGTCTGG	196	43	ctggaggatcacatgccttggtcctgaaggggatctgcacccgcaccatggcatccacTCCAGGTGGAATCGGTGACAGTGGTTTTATAAATTGCTAAGTCCTTTATTGTTTCAGTGACATTTTCTAAAAGGAATTAAAAGCTTTGAAGAATTCTATGCAAGTTCAGAGTAGGCCAGACCACAAAGCTGCAAAATA	One primer sits in the repeat region
BRCA2	BRCA2_113	chr13	32968741	32968935	ACACTGACGACATGGTTCTACAAGGCATATTAGAGTTTCCTTTCTTGC	TACGGTAGCAGAGACTTGGTCTTGCAGCAATTAACATATGAGGCTT	195	32	AGGCATATTAGAGTTTCCTTTCTTGCATCTTAAAATTCATCTAACACATCTATAATAACATTCTTTTCTTTTTTTTCCATTCTAGGACTTGCCCCTTTCGTCTATTTGTCAGACGAATGTTACAATTTACTGGCAATAAAGTTTTGGATAGACCTTAATGAGGACATTATTAAGCCTCATATGTTAATTGCTGCA	Assays designed by relax mode and have no off-target hits
BRCA2	BRCA2_114	chr13	32968830	32969028	ACACTGACGACATGGTTCTACATGCCCCTTTCGTCTATTTGTCAG	TACGGTAGCAGAGACTTGGTCTGCCCTCTTTTGGACTAGCAGAA	199	40	TGCCCCTTTCGTCTATTTGTCAGACGAATGTTACAATTTACTGGCAATAAAGTTTTGGATAGACCTTAATGAGGACATTATTAAGCCTCATATGTTAATTGCTGCAAGCAACCTCCAGTGGCGACCAGAATCCAAATCAGGCCTTCTTACTTTATTTGCTGGAGATTTTTCTGTGTTTTCTGCTAGTCCAAAAGAGGGC	Assays designed by relax mode and have no off-target hits
BRCA2	BRCA2_115	chr13	32968930	32969107	ACACTGACGACATGGTTCTACAGCTGCAAGCAACCTCCAGT	TACGGTAGCAGAGACTTGGTCTTACCAAAATGTGTGGTGATGCTG	178	41	GCTGCAAGCAACCTCCAGTGGCGACCAGAATCCAAATCAGGCCTTCTTACTTTATTTGCTGGAGATTTTTCTGTGTTTTCTGCTAGTCCAAAAGAGGGCCACTTTCAAGAGACATTCAACAAAATGAAAAATACTGTTGAGGTAAGGTTACTTTTCAGCATCACCACACATTTTGGTA	Assays designed by relax mode and have no off-target hits
BRCA2	BRCA2_116	chr13	32970934	32971113	ACACTGACGACATGGTTCTACATGGTCCAAACTTTTCATTTCTGCTTT	TACGGTAGCAGAGACTTGGTCTGGGTGGACCACTTGGGA	180	34	TGGTCCAAACTTTTCATTTCTGCTTTTAAAGGAAATACTTTTGGAAACATAAATATGTGGGTTTGCAATTTATAAAGCAGCTTTTCCACTTATTTTCTTAGAATATTGACATACTTTGCAATGAAGCAGAAAACAAGCTTATGCATATACTGCATGCAAATGATCCCAAGTGGTCCACCC
BRCA2	BRCA2_117	chr13	32971050	32971232	ACACTGACGACATGGTTCTACATGCAATGAAGCAGAAAACAAGC	TACGGTAGCAGAGACTTGGTCTTGGCCTCCATATATACTTCTTATAATATTCC	183	40	TGCAATGAAGCAGAAAACAAGCTTATGCATATACTGCATGCAAATGATCCCAAGTGGTCCACCCCAACTAAAGACTGTACTTCAGGGCCGTACACTGCTCAAATCATTCCTGGTACAGGAAACAAGCTTCTGGTAAGTTAATGTAAACTCAAGGAATATTATAAGAAGTATATATGGAGGCCA
BRCA2	BRCA2_118	chr13	32972189	32972375	ACACTGACGACATGGTTCTACAACTGTGTGTAATATTTGCGTGCTT	TACGGTAGCAGAGACTTGGTCTGTGGAAACAGACTTCCTTTTGGC	187	29	ACTGTGTGTAATATTTGCGTGCTTAAATATTTTCAATGAAAAGTTACTTTGATTTAGTTTTTTATGTTACTACATAATTATGATAGGCTACGTTTTCATTTTTTTATCAGATGTCTTCTCCTAATTGTGAGATATATTATCAAAGTCCTTTATCACTTTGTATGGCCAAAAGGAAGTCTGTTTCCAC	Assays designed by relax mode and have no off-target hits
BRCA2	BRCA2_119	chr13	32972289	32972464	ACACTGACGACATGGTTCTACATTTTTATCAGATGTCTTCTCCTAATTGTG	TACGGTAGCAGAGACTTGGTCTCCAAGGCTCTTCTCTTTTTGCAG	176	39	TTTTTATCAGATGTCTTCTCCTAATTGTGAGATATATTATCAAAGTCCTTTATCACTTTGTATGGCCAAAAGGAAGTCTGTTTCCACACCTGTCTCAGCCCAGATGACTTCAAAGTCTTGTAAAGGGGAGAAAGAGATTGATGACCAAAAGAACTGCAAAAAGAGAAGAGCCTTGG	Assays designed by relax mode and have no off-target hits
BRCA2	BRCA2_120	chr13	32972412	32972609	ACACTGACGACATGGTTCTACAAGGGGAGAAAGAGATTGATGACC	TACGGTAGCAGAGACTTGGTCTGGAGAATTCAGTTCTTTTTTCTTTATGGG	198	43	AGGGGAGAAAGAGATTGATGACCAAAAGAACTGCAAAAAGAGAAGAGCCTTGGATTTCTTGAGTAGACTGCCTTTACCTCCACCTGTTAGTCCCATTTGTACATTTGTTTCTCCGGCTGCACAGAAGGCATTTCAGCCACCAAGGAGTTGTGGCACCAAATACGAAACACCCATAAAGAAAAAAGAACTGAATTCTCC	Assays designed by relax mode and have no off-target hits
BRCA2	BRCA2_121	chr13	32972486	32972684	ACACTGACGACATGGTTCTACATACCTCCACCTGTTAGTCCCATT	TACGGTAGCAGAGACTTGGTCTGCAAGTTCTTCGTCAGCTATTGA	199	39	TACCTCCACCTGTTAGTCCCATTTGTACATTTGTTTCTCCGGCTGCACAGAAGGCATTTCAGCCACCAAGGAGTTGTGGCACCAAATACGAAACACCCATAAAGAAAAAAGAACTGAATTCTCCTCAGATGACTCCATTTAAAAAATTCAATGAAATTTCTCTTTTGGAAAGTAATTCAATAGCTGACGAAGAACTTGC	Assays designed by relax mode and have no off-target hits
BRCA2	BRCA2_122	chr13	32972573	32972771	ACACTGACGACATGGTTCTACAACGAAACACCCATAAAGAAAAAAGAACT	TACGGTAGCAGAGACTTGGTCTGTGGGAGCAGTCCTAGTGGAT	199	35	ACGAAACACCCATAAAGAAAAAAGAACTGAATTCTCCTCAGATGACTCCATTTAAAAAATTCAATGAAATTTCTCTTTTGGAAAGTAATTCAATAGCTGACGAAGAACTTGCATTGATAAATACCCAAGCTCTTTTGTCTGGTTCAACAGGAGAAAAACAATTTATATCTGTCAGTGAATCCACTAGGACTGCTCCCAC	Assays designed by relax mode and have no off-target hits
BRCA2	BRCA2_123	chr13	32972696	32972846	ACACTGACGACATGGTTCTACACCCAAGCTCTTTTGTCTGGTTC	TACGGTAGCAGAGACTTGGTCTGCCTGGGAACTCTCCTGTTCT	151	44	CCCAAGCTCTTTTGTCTGGTTCAACAGGAGAAAAACAATTTATATCTGTCAGTGAATCCACTAGGACTGCTCCCACCAGTTCAGAAGATTATCTCAGACTGAAACGACGTTGTACTACATCTCTGATCAAAGAACAGGAGAGTTCCCAGGC
BRCA2	BRCA2_124	chr13	32972756	32972954	ACACTGACGACATGGTTCTACACTAGGACTGCTCCCACCA	TACGGTAGCAGAGACTTGGTCTACTGGAAAGGTTAAGCGTCAATA	199	40	CTAGGACTGCTCCCACCAGTTCAGAAGATTATCTCAGACTGAAACGACGTTGTACTACATCTCTGATCAAAGAACAGGAGAGTTCCCAGGCCAGTACGGAAGAATGTGAGAAAAATAAGCAGGACACAATTACAACTAAAAAATATATCTAAGCATTTGCAAAGGCGACAATAAATTATTGACGCTTAACCTTTCCAGT	Assays designed by relax mode and have no off-target hits
BRCA2	BRCA2_3_UTR_1	chr13	32972832	32972989	ACACTGACGACATGGTTCTACAGGAGAGTTCCCAGGCCAGTA	TACGGTAGCAGAGACTTGGTCTAATGTGTGGTTTGAAATTATATTCCAGT	158	35	GGAGAGTTCCCAGGCCAGTACGGAAGAATGTGAGAAAAATAAGCAGGACACAATTACAACTAAAAAATATATCTAAGCATTTGCAAAGGCGACAATAAATTATTGACGCTTAACCTTTCCAGTTTATAAGACTGGAATATAATTTCAAACCACACATT
BRCA2	BRCA2_3_UTR_2	chr13	32972934	32973106	ACACTGACGACATGGTTCTACATTGACGCTTAACCTTTCCAGTTT	TACGGTAGCAGAGACTTGGTCTTGCAACTGAAGCAAAAGTATACCA	173	35	TTGACGCTTAACCTTTCCAGTTTATAAGACTGGAATATAATTTCAAACCACACATTAGTACTTATGTTGCACAATGAGAAAAGAAATTAGTTTCAAATTTACCTCAGCGTTTGTGTATCGGGCAAAAATCGTTTTGCCCGATTCCGTATTGGTATACTTTTGCTTCAGTTGCA
BRCA2	BRCA2_3_UTR_3	chr13	32973032	32973229	ACACTGACGACATGGTTCTACATTACCTCAGCGTTTGTGTATCGG	TACGGTAGCAGAGACTTGGTCTCTGGCCTCAAGCACTCCTC	198	42	TTACCTCAGCGTTTGTGTATCGGGCAAAAATCGTTTTGCCCGATTCCGTATTGGTATACTTTTGCTTCAGTTGCATATCTTAAAACTAAATGTAATTTATTAACTAATCAAGAAAAACATCTTTggctgagctcggtggctcatgcctgtaatcccaacactttgagaagctgaggtgggaggagtgcttgaggccag	One primer sits in the repeat region
BRCA2	BRCA2_3_UTR_5	chr13	32973253	32973427	ACACTGACGACATGGTTCTACACATAGGGAGACCCCCATCTT	TACGGTAGCAGAGACTTGGTCTTCTGCATCAAAATAACTGTACTAAGAGA	175	30	catagggagacccccatctttacaaagaaaaaaaaaaGGGGAAAAGAAAATCTTTTAAATCTTTGGATTTGATCACTACAAGTATTATTTTACAAGTGAAATAAACATACCATTTTCTTTTAGATTGTGTCATTAAATGGAATGAGGTCTCTTAGTACAGTTATTTTGATGCAGA	One primer sits in the repeat region
BRCA2	BRCA2_3_UTR_6	chr13	32973316	32973499	ACACTGACGACATGGTTCTACATGGATTTGATCACTACAAGTATTATTTTACA	TACGGTAGCAGAGACTTGGTCTAGGAGAACTATTTCATAGTGAGTTACC	184	29	TGGATTTGATCACTACAAGTATTATTTTACAAGTGAAATAAACATACCATTTTCTTTTAGATTGTGTCATTAAATGGAATGAGGTCTCTTAGTACAGTTATTTTGATGCAGATAATTCCTTTTAGTTTAGCTACTATTTTAGGGGATTTTTTTTAGAGGTAACTCACTATGAAATAGTTCTCCT
BRCA2	BRCA2_3_UTR_7	chr13	32973390	32973583	ACACTGACGACATGGTTCTACATGGAATGAGGTCTCTTAGTACAGTT	TACGGTAGCAGAGACTTGGTCTTGCTCAAAAGGAAACACCACTCT	194	34	TGGAATGAGGTCTCTTAGTACAGTTATTTTGATGCAGATAATTCCTTTTAGTTTAGCTACTATTTTAGGGGATTTTTTTTAGAGGTAACTCACTATGAAATAGTTCTCCTTAATGCAAATATGTTGGTTCTGCTATAGTTCCATCCTGTTCAAAAGTCAGGATGAATATGAAGAGTGGTGTTTCCTTTTGAGCA
BRCA2	BRCA2_3_UTR_8	chr13	32973511	32973681	ACACTGACGACATGGTTCTACATGTTGGTTCTGCTATAGTTCCATCC	TACGGTAGCAGAGACTTGGTCTTTTAATTTCAGAGATCACACTGGAATAGT	171	35	TGTTGGTTCTGCTATAGTTCCATCCTGTTCAAAAGTCAGGATGAATATGAAGAGTGGTGTTTCCTTTTGAGCAATTCTTCATCCTTAAGTCAGCATGATTATAAGAAAAATAGAACCCTCAGTGTAACTCTAATTCCTTTTTACTATTCCAGTGTGATCTCTGAAATTAAA
BRCA2	BRCA2_3_UTR_9	chr13	32973572	32973770	ACACTGACGACATGGTTCTACATCCTTTTGAGCAATTCTTCATCCTT	TACGGTAGCAGAGACTTGGTCTTGAGTTTGGATGACCATTTTGTTG	199	27	TCCTTTTGAGCAATTCTTCATCCTTAAGTCAGCATGATTATAAGAAAAATAGAACCCTCAGTGTAACTCTAATTCCTTTTTACTATTCCAGTGTGATCTCTGAAATTAAATTACTTCAACTAAAAATTCAAATACTTTAAATCAGAAGATTTCATAGTTAATTTATTTTTTTTTTCAACAAAATGGTCATCCAAACTCA
BRCA2	BRCA2_3_UTR_10	chr13	32973633	32973831	ACACTGACGACATGGTTCTACATGTAACTCTAATTCCTTTTTACTATTCCAGT	TACGGTAGCAGAGACTTGGTCTGCGCTAAAAATAAAGCAGGCAGA	199	28	TGTAACTCTAATTCCTTTTTACTATTCCAGTGTGATCTCTGAAATTAAATTACTTCAACTAAAAATTCAAATACTTTAAATCAGAAGATTTCATAGTTAATTTATTTTTTTTTTCAACAAAATGGTCATCCAAACTCAAACTTGAGAAAATATCTTGCTTTCAAATTGGCACTGATTCTGCCTGCTTTATTTTTAGCGC
BRCA2	BRCA2_3_UTR_11	chr13	32973746	32973929	ACACTGACGACATGGTTCTACATCAACAAAATGGTCATCCAAACTCAA	TACGGTAGCAGAGACTTGGTCTaaaaaaGGACGTAACAAATGAGAGTAT	184	35	TCAACAAAATGGTCATCCAAACTCAAACTTGAGAAAATATCTTGCTTTCAAATTGGCACTGATTCTGCCTGCTTTATTTTTAGCGCTATCACAGGACCCAGAGCCTATGCCCTTTTAAACTTACCACAAAAGCAGAAGATTAATTCAATTTAAGATGATACTCTCATTTGTTACGTCCtttttt	One primer sits in the repeat region
BRCA2_3_UTR	BRCA2_3_UTR_12	chr13	32973158	32973307	ACACTGACGACATGGTTCTACACTGAGCTCGGTGGCTCAT	TACGGTAGCAGAGACTTGGTCTAAAGATTTTCTTTTCCCCTTTTT	150	49	CTGAGCTCGGTGGCTCATGCCTGTAATCCCAACACTTTGAGAAGCTGAGGTGGGAGGAGTGCTTGAGGCCAGGAGTTCAAGACCAGCCTGGGCAACATAGGGAGACCCCCATCTTTACAAAGAAAAAAAAAAGGGGAAAAGAAAATCTTT
BRCA2_Promoter_Combined	BRCA2_Promoter_Combined_14	chr13	32888661	32888849	ACACTGACGACATGGTTCTACACTGCGAGGAAGACAGGTGAT	TACGGTAGCAGAGACTTGGTCTGCACGGCTAACTTTGCATTT	189	55	CTGCGAGGAAGACAGGTGATCCGAATCCTAAGAATGCAAAAGATGGGCCGGGTGTGGTGGCTCATGCCTGTAATCCCAGCGCTTTGGGAGGCCGAGGCAGGCAGATCACCTGAGGTCGGGAGGTTGAGACCAGACTGACCAACAACGGAGAAACCCCGTCTCTACTTAAAAATGCAAAGTTAGCCGTGC
BRCA2_Promoter_Combined	BRCA2_Promoter_Combined_15	chr13	32888792	32888990	ACACTGACGACATGGTTCTACAAGACTGACCAACAACGGAGAA	TACGGTAGCAGAGACTTGGTCTTGAGACGGAGTTTCGCTCTT	199	57	AGACTGACCAACAACGGAGAAACCCCGTCTCTACTTAAAAATGCAAAGTTAGCCGTGCGTGGTGGCCCATGCCTGTATTCCCAGCTACTCGGGAGGCTGAGGCAGGAGAACCACTTGATCCCTGGAGGCGGAAGTTGCGGTGAGCGGAGATTGCGCCATTGCACACCAGCCCGGGCCACAAGAGCGAAACTCCGTCTCA
BRCA2_Promoter_Combined	BRCA2_Promoter_Combined_16	chr13	32888925	32889092	ACACTGACGACATGGTTCTACAGTTGCGGTGAGCGGAGAT	TACGGTAGCAGAGACTTGGTCTCCGTTTCCTTGCTTGAAAAA	168	50	GTTGCGGTGAGCGGAGATTGCGCCATTGCACACCAGCCCGGGCCACAAGAGCGAAACTCCGTCTCAAAAAAAAAAGCAAAAGATACTACCAAGCCCTGCGGAGCAAGGTACCTCACACTTCATGAGCGAGTTAAGATGGGTTTCACAATTTTTCAAGCAAGGAAACGG
BRE	BRE_1	chr2	28117323	28117513	ACACTGACGACATGGTTCTACACTGTCCAGTTTTCAGGCAGAGTG	TACGGTAGCAGAGACTTGGTCTATCCAGTCCCACTTTTCCATTCC	191	44	CTGTCCAGTTTTCAGGCAGAGTGTTGTATCTAGTCCATTTGTAAGCCCTGATCATTATTCTTTCCTTCTGCTTTCAGTGGTGATTTACAAGTCAAGTTAAAATGTCCCCAGAAGTGGCCTTGAACCGAATATCTCCAATGCTCTCCCCTTTCATATCTAGCGTGGTCCGGAATGGAAAAGTGGGACTGGAT
BRE	BRE_2	chr2	28117438	28117625	ACACTGACGACATGGTTCTACAGGCCTTGAACCGAATATCTCCAA	TACGGTAGCAGAGACTTGGTCTGGTAAGGAAGGGCTGTCATTAGG	188	44	GGCCTTGAACCGAATATCTCCAATGCTCTCCCCTTTCATATCTAGCGTGGTCCGGAATGGAAAAGTGGGACTGGATGCTACAAACTGTTTGAGGATAACTGACTTAAAATCTGGGTATGTACCAGAATGAATTCAGTCAATGTACCAGAACCAATTCAACCTTTACCTAATGACAGCCCTTCCTTACC
BRE	BRE_3	chr2	28152632	28152816	ACACTGACGACATGGTTCTACAACATGTGGGTTTTTAAAGTTTGTTTTTA	TACGGTAGCAGAGACTTGGTCTTGTAACCTACATTTTGAGTAAAATAGTCATC	185	34	ACATGTGGGTTTTTAAAGTTTGTTTTTAAAAAATCTTTTCTTTCTTCTGTTTCTGCATTTTTTAAAGCTGCACATCATTGACTCCTGGGCCCAACTGTGACCGATTTAAACTGCACATACCATATGCTGGAGAGACATTAAAGTGTAAGTAAATGATGACTATTTTACTCAAAATGTAGGTTACA
BRE	BRE_4	chr2	28210832	28211014	ACACTGACGACATGGTTCTACAAAGGACCTGTCATTTTCTTTTATTTCA	TACGGTAGCAGAGACTTGGTCTAGCCAATTTTGTTTTCCTTTCACC	183	42	AAGGACCTGTCATTTTCTTTTATTTCAGGGGATATCATTTTCAATGCCCAATACCCAGAACTGCCTCCCGATTTTATCTTTGGAGAAGATGCTGAATTCCTGCCAGACCCCTCAGCTTTGCAGGTGAGTACTGCAGACTTGCTTGAATGATCTTTCTTTGGTGAAAGGAAAACAAAATTGGCT
BRE	BRE_5	chr2	28248013	28248185	ACACTGACGACATGGTTCTACAACATTGATGTGTGAATGTGATACTGG	TACGGTAGCAGAGACTTGGTCTGCGGCTACATTGGAATTGGTGAT	173	38	ACATTGATGTGTGAATGTGATACTGGATTTGTATGAAATTTCAGTTTTAACTGGTCTTTTATTTGTTACGACTTCTACAGAATCTTGCCTCCTGGAATCCTTCAAATCCTGAATGTCTCTTACTTGTGGTGAAGGAACTTGTGCAACAATATCACCAATTCCAATGTAGCCGC
BRE	BRE_6	chr2	28248126	28248301	ACACTGACGACATGGTTCTACATGTCTCTTACTTGTGGTGAAGGA	TACGGTAGCAGAGACTTGGTCTTCAAAAATCCTTACCCAGTTGTTTTT	176	44	TGTCTCTTACTTGTGGTGAAGGAACTTGTGCAACAATATCACCAATTCCAATGTAGCCGCCTCCGGGAGAGCTCCCGCCTCATGTTTGAATACCAGACATTACTGGAGGAGCCACAGTATGGAGAGAACATGGAAATTTATGCTGGGAAAAAAAACAACTGGGTAAGGATTTTTGA
BRE	BRE_7	chr2	28248231	28248405	ACACTGACGACATGGTTCTACAGAGGAGCCACAGTATGGAGAGAA	TACGGTAGCAGAGACTTGGTCTATAGGCTACCTGGACCATGTTTA	175	34	GAGGAGCCACAGTATGGAGAGAACATGGAAATTTATGCTGGGAAAAAAAACAACTGGGTAAGGATTTTTGAGAATGGAAAAAAAGATGACTTCATCCATAATAAAATAATCAATTCATATGTCCATTTGTAAATCCTAGTCATTTCTTTAGATAAACATGGTCCAGGTAGCCTAT
BRE	BRE_8	chr2	28268524	28268715	ACACTGACGACATGGTTCTACATGGCTATAATTGTCACTTCATAATCTATTTTT	TACGGTAGCAGAGACTTGGTCTACTTAAAAAGCTCACTTATATTCTCATACTG	192	30	TGGCTATAATTGTCACTTCATAATCTATTTTTGATTTTAATCTTATTATTATAACTTTCTTTTTACAGACTGGTGAATTTTCAGCTCGTTTCCTTTTGAAGCTGCCCGTAGATTTCAGCAATATCCCCACATACCTTCTCAAGGTAAAAATATATGATTTTCAGTATGAGAATATAAGTGAGCTTTTTAAGT
BRE	BRE_9	chr2	28352094	28352279	ACACTGACGACATGGTTCTACATAGGAGAACAGGTGCTGATGTTG	TACGGTAGCAGAGACTTGGTCTGCACCAGGCTACCTCATGTTAAT	186	47	TAGGAGAACAGGTGCTGATGTTGTGTTTTCACTTCTTGTTTAAGGATGTAAATGAAGACCCTGGAGAAGATGTGGCCCTCCTCTCTGTTAGTTTTGAGGACACTGAAGCCACCCAGGTGTACCCCAAGCTGTACTTGTCACCTCGAATTGAGCAGTAAGTGTCATTAACATGAGGTAGCCTGGTGC
BRE	BRE_10	chr2	28460004	28460199	ACACTGACGACATGGTTCTACAGGGGTGTCACTTCTTAAGTTGCT	TACGGTAGCAGAGACTTGGTCTTAAGAGGGATGAGTTGGGGACTT	196	48	GGGGTGTCACTTCTTAAGTTGCTTGAGCCCTAAGAGAAGTGTCCATTGTACTCTTGTCCTTTCAGTGCACTTGGAGGCTCCTCAGCTCTTCATATCCCAGCTTTTCCAGGAGGAGGATGTCTCATTGATTACGTTCCTCAAGTATGCCACCTGCTCACCAACAAGGTAAAAGCAAGTCCCCAACTCATCCCTCTTA
BRE	BRE_11	chr2	28464153	28464336	ACACTGACGACATGGTTCTACATCCCACTCTACTTCTCAGCTTTG	TACGGTAGCAGAGACTTGGTCTTAATCAAGCCCCCATGTTGAGGT	184	46	TCCCACTCTACTTCTCAGCTTTGGGTTTCTATTCCAGGTGCAGTACGTGATTCAAGGGTATCACAAAAGAAGAGAGTATATTGCTGCTTTTCTCAGTCACTTTGGCACGTAAGTTCTGCCCTGTTTGAACGATATACCGGTGATGCCCTCGCTTGCTGATGACCTCAACATGGGGGCTTGATTA
BRE	BRE_12	chr2	28467526	28467702	ACACTGACGACATGGTTCTACAACCCATCTCAAAGTCAATAACCCT	TACGGTAGCAGAGACTTGGTCTACATCAGCAGCAGAGTGAGTTTT	177	34	ACCCATCTCAAAGTCAATAACCCTGACTTCACGAATATATTCTTTACTTGGTTTTATTGCTTTTATACCTTAATTTTATGAGGGTTTTTTTTGTTTGTGTGTGTATGTTTTTATTACTTAGAGGTGTCGTGGAATATGATGCAGAAGGCTTTACAAAACTCACTCTGCTGCTGATGT
BRE	BRE_13	chr2	28467645	28467830	ACACTGACGACATGGTTCTACAAGAGGTGTCGTGGAATATGATGC	TACGGTAGCAGAGACTTGGTCTGAACCGAGACAGGACAGAAAAGG	186	39	AGAGGTGTCGTGGAATATGATGCAGAAGGCTTTACAAAACTCACTCTGCTGCTGATGTGGAAAGATTTTTGTTTTCTTGTACACAGTGAGTATACTTTTGCTGTCAGCATGTCAGCATACATTTTTAAATGTCCTAAACCACATGTAATAATCAGTACTAGAACCTTTTCTGTCCTGTCTCGGTTC
BRE	BRE_14	chr2	28521105	28521303	ACACTGACGACATGGTTCTACACAAATAGAGTTTCGTACCTAACATTCG	TACGGTAGCAGAGACTTGGTCTTTTGGGCCTGGGAGTAAAGC	199	39	CAAATAGAGTTTCGTACCTAACATTCGGATTTAGTCAAAAAAAAAAATCTTAAGATGTGTTTATGCTCTAACTTTCTTTTTCTTTCTTCTGTCTTTGCAGTTGACCTGCCTCTGTTTTTCCCTCGAGACCAGCCAACTCTCACATTTCAGTCCGTTTATCACTTTACCAACAGTGGACAGCTTTACTCCCAGGCCCAAA
BRE	BRE_15	chr2	28521230	28521422	ACACTGACGACATGGTTCTACAAGACCAGCCAACTCTCACATTTC	TACGGTAGCAGAGACTTGGTCTccaacccctgGACTAGATAAACA	193	44	AGACCAGCCAACTCTCACATTTCAGTCCGTTTATCACTTTACCAACAGTGGACAGCTTTACTCCCAGGCCCAAAAAAATTATCCGTACAGCCCCAGATGGGATGGAAATGAAATGGCCAAAAGAGCAAAGTAAGTGAATCTGTCGTTATTTCCAACAGGTAAGAGCATTTTGTTTATCTAGTCcaggggttgg	One primer sits in the repeat region
BRE	BRE_16	chr2	28532829	28533020	ACACTGACGACATGGTTCTACATGGGGTTTAGAAGTAGAGCTGTG	TACGGTAGCAGAGACTTGGTCTCTATGCAATTTGGAGAGGATGCC	192	41	TGGGGTTTAGAAGTAGAGCTGTGAAGAGAAAAGCAAATCATATAAATAACGTGGAATTATTGGATCCTTGAACCCTTTTGAAAAGTATCTTAAAGGGATTTGGTTTGTTTTTCCTTACAGAAGAGAGAGCAACAGAGATGGGGAGGAATCCAGCTCTGCCTGACATCCAGGCATCCTCTCCAAATTGCATAG
BRE	BRE_17	chr2	28550061	28550251	ACACTGACGACATGGTTCTACACCATTAGGACTACCCTGTCCCTC	TACGGTAGCAGAGACTTGGTCTGAGCTTGGCCAGTTCCTCTG	191	60	CCATTAGGACTACCCTGTCCCTCCCTCCATTTAGCCAGCTGGCCCTCCCTTCTCCTCCTCCTTCTCATCTGCTGCACCAGGGGATGCCAAGGGAGCAGAGATGCCTGCAGCCCGTGGGAGCAAGTCCTGGCCTTTGCAGTTGCAAAAACTGGCTGCAAGCTGCTCCAGCCCCAGAGGAACTGGCCAAGCTC
BRE	BRE_18	chr2	28550171	28550352	ACACTGACGACATGGTTCTACACCCGTGGGAGCAAGTCC	TACGGTAGCAGAGACTTGGTCTGGTTCCTGCTAAATCACAGGGTA	182	52	CCCGTGGGAGCAAGTCCTGGCCTTTGCAGTTGCAAAAACTGGCTGCAAGCTGCTCCAGCCCCAGAGGAACTGGCCAAGCTCCAGAGGGCCTCCTTGGAGGGCCTCAGAGGGAGAGAGAACTGCTCAGTAATTTTGATCACTTTGGTAAGTATTTAAAAATACCCTGTGATTTAGCAGGAACC
BRE	BRE_19	chr2	28561247	28561437	ACACTGACGACATGGTTCTACATCCCAGTTGCACTTTGTTTCAAG	TACGGTAGCAGAGACTTGGTCTTGCTGACACGCATGTGGAC	191	48	TCCCAGTTGCACTTTGTTTCAAGTTGTTTGTGCTAACCACAATTTTTTTTCTCCCCTTCTTTCCCACCAGGGCTTATTTCAAAACCTTTGTCCCTCAGTTCCAGGAGGCAGCATTTGCCAATGGAAAGCTCTAGGAAACACCAGTCTTGAGAGGTGGCCAGCCAGACTGCCTGTCCACATGCGTGTCAGCA
BRIP1	BRIP1_1	chr17	59760592	59760777	ACACTGACGACATGGTTCTACAACTTACAACAGAGTTTAACATAAGCATGA	TACGGTAGCAGAGACTTGGTCTTGGTAATGTAAAAACAACTTGGATAAATGA	186	30	ACTTACAACAGAGTTTAACATAAGCATGATGACATATTTTTACTTAGCTTGAGAGTTAAGTATTATTACTTAAAACCAGGAAACATGCCTTTATTTTTGGAAGGAGATGGTTTAAAGTTCTTTATTTCTATTTCATGAGTTTTTCCCAGTTCCAGTTCATTTATCCAAGTTGTTTTTACATTACCA
BRIP1	BRIP1_2	chr17	59760667	59760862	ACACTGACGACATGGTTCTACACCAGGAAACATGCCTTTATTTTTGGA	TACGGTAGCAGAGACTTGGTCTCCAGAGAAGTGAAAGCTGAGGAT	196	33	CCAGGAAACATGCCTTTATTTTTGGAAGGAGATGGTTTAAAGTTCTTTATTTCTATTTCATGAGTTTTTCCCAGTTCCAGTTCATTTATCCAAGTTGTTTTTACATTACCATCAATGTCATCAATTTTACTTTCTTCAATATGCAGAATTCCATTCAACTTTGTATCTATGCAATCCTCAGCTTTCACTTCTCTGG
BRIP1	BRIP1_3	chr17	59760774	59760966	ACACTGACGACATGGTTCTACAACCATCAATGTCATCAATTTTACTTTCT	TACGGTAGCAGAGACTTGGTCTTGACCTAGCTGAAACTGATAGAGGA	193	33	ACCATCAATGTCATCAATTTTACTTTCTTCAATATGCAGAATTCCATTCAACTTTGTATCTATGCAATCCTCAGCTTTCACTTCTCTGGCTGAATCTACTTCTTTTATAGTTCTAATTTCAAAAAGGTCTTTAGCTAAAATGCAATCTGAATTGTTAGCCAATCTATTTCCTCTATCAGTTTCAGCTAGGTCA
BRIP1	BRIP1_4	chr17	59760836	59761029	ACACTGACGACATGGTTCTACATGCAATCCTCAGCTTTCACTTCT	TACGGTAGCAGAGACTTGGTCTAGATGAATCTATCTATTTTACACCTGAACT	194	33	TGCAATCCTCAGCTTTCACTTCTCTGGCTGAATCTACTTCTTTTATAGTTCTAATTTCAAAAAGGTCTTTAGCTAAAATGCAATCTGAATTGTTAGCCAATCTATTTCCTCTATCAGTTTCAGCTAGGTCATTTTTTTCTTCATCTGTATCTTCAGGATCATAAAGTTCAGGTGTAAAATAGATAGATTCATCT
BRIP1	BRIP1_5	chr17	59760942	59761130	ACACTGACGACATGGTTCTACATCCTCTATCAGTTTCAGCTAGGTC	TACGGTAGCAGAGACTTGGTCTCTCTGTTCTGAAGAAGCCCTGGA	189	36	TCCTCTATCAGTTTCAGCTAGGTCATTTTTTTCTTCATCTGTATCTTCAGGATCATAAAGTTCAGGTGTAAAATAGATAGATTCATCTTCTGCTTCTGTTTCAAAATCTCTATTTGAAGTGGACTGTTTATCTTCTTCACTTACTAGAGACAATTCAATGTCTGGATCCAGGGCTTCTTCAGAACAGAG
BRIP1	BRIP1_6	chr17	59761072	59761248	ACACTGACGACATGGTTCTACATCTTCTTCACTTACTAGAGACAATTCA	TACGGTAGCAGAGACTTGGTCTTGAATCCTCAAATCTGACAGTAAACA	177	38	TCTTCTTCACTTACTAGAGACAATTCAATGTCTGGATCCAGGGCTTCTTCAGAACAGAGCGGATGTTCAGAATGATTTTTTCTAGTAAGGGTGGCATCAATCTTTAATGATGAAATAATGGTTTCTGATTGAGGGCATGATCCAAACGATGTGTTTACTGTCAGATTTGAGGATTCA
BRIP1	BRIP1_7	chr17	59761115	59761306	ACACTGACGACATGGTTCTACACTTCTTCAGAACAGAGCGGATGT	TACGGTAGCAGAGACTTGGTCTCCCGTTTCAAAACAGAGAAGATGG	192	38	CTTCTTCAGAACAGAGCGGATGTTCAGAATGATTTTTTCTAGTAAGGGTGGCATCAATCTTTAATGATGAAATAATGGTTTCTGATTGAGGGCATGATCCAAACGATGTGTTTACTGTCAGATTTGAGGATTCACATTTATCAGTGAAGGGCAAAACAGTTTTACTTTCCATCTTCTCTGTTTTGAAACGGG
BRIP1	BRIP1_8	chr17	59761246	59761444	ACACTGACGACATGGTTCTACATCACATTTATCAGTGAAGGGCAA	TACGGTAGCAGAGACTTGGTCTCCACAAGCCCAACTTTCAACAAA	199	42	TCACATTTATCAGTGAAGGGCAAAACAGTTTTACTTTCCATCTTCTCTGTTTTGAAACGGGGAGGACTAGAGGCACTATTCTCTGATGACCCGAGCTCAGGTGTTGCCTTCGGTATTTTACCAGTAAAATACTGTCCCAAAGAATTAAAGCTTGACCAGCTAACTCTCTTTGTTTGTTTGTTGAAAGTTGGGCTTGTGG
BRIP1	BRIP1_9	chr17	59761378	59761558	ACACTGACGACATGGTTCTACATGTCCCAAAGAATTAAAGCTTGACC	TACGGTAGCAGAGACTTGGTCTAGCAATTATGTTAGCTAGGAGCAGA	181	36	TGTCCCAAAGAATTAAAGCTTGACCAGCTAACTCTCTTTGTTTGTTTGTTGAAAGTTGGGCTTGTGGATCTGGAAATCACAATTTTTTCTGCTTTCCCTGCTTCTTCCAGGAATACTGGATCATCTAAGAATACAAGAATTTAAGAGATTTAACTTTCTGCTCCTAGCTAACATAATTGCT
BRIP1	BRIP1_10	chr17	59763156	59763330	ACACTGACGACATGGTTCTACAAGACTTCTCTATCAAAGGTAAATGGGA	TACGGTAGCAGAGACTTGGTCTAGCAGCAAGTCATCTATCACCAG	175	36	AGACTTCTCTATCAAAGGTAAATGGGAAGAACTTTTCATACTTTTCTCCTTTCTGGAGATAATGCTACTTGGTAGAGGTGAATTTTTGGTAATAATTTTAGGACACTGTAGTTCCTGGACACATATCTTTGCTTCATCTTCCACAAAATTTTCTGGTGATAGATGACTTGCTGCT
BRIP1	BRIP1_11	chr17	59763219	59763412	ACACTGACGACATGGTTCTACAGCTACTTGGTAGAGGTGAATTTTTGG	TACGGTAGCAGAGACTTGGTCTAGGACAGAACCAATATACAGGACA	194	38	GCTACTTGGTAGAGGTGAATTTTTGGTAATAATTTTAGGACACTGTAGTTCCTGGACACATATCTTTGCTTCATCTTCCACAAAATTTTCTGGTGATAGATGACTTGCTGCTTCCAGTAAATAAGGTGAGGTACTGTACTTTAAAGAGGTCACTTCAAGTGTAGACTCATTGTCCTGTATATTGGTTCTGTCCT
BRIP1	BRIP1_12	chr17	59763312	59763506	ACACTGACGACATGGTTCTACATGATAGATGACTTGCTGCTTCCA	TACGGTAGCAGAGACTTGGTCTCAGCAGATTCAGCACCATTCAAC	195	38	TGATAGATGACTTGCTGCTTCCAGTAAATAAGGTGAGGTACTGTACTTTAAAGAGGTCACTTCAAGTGTAGACTCATTGTCCTGTATATTGGTTCTGTCCTTTATGGATACATTAAGAACTTTTTGATGCTTTTTGGAAAATTCAGCCAAGGATTCCAGTGCACTTTCAAAGGTTGAATGGTGCTGAATCTGCTG
BRIP1	BRIP1_13	chr17	59763373	59763560	ACACTGACGACATGGTTCTACATCAAGTGTAGACTCATTGTCCTGT	TACGGTAGCAGAGACTTGGTCTACCAAATTTTCCCTGGGTTTACCT	188	38	TCAAGTGTAGACTCATTGTCCTGTATATTGGTTCTGTCCTTTATGGATACATTAAGAACTTTTTGATGCTTTTTGGAAAATTCAGCCAAGGATTCCAGTGCACTTTCAAAGGTTGAATGGTGCTGAATCTGCTGCCGTACCCATTTAGAAAGTCCTAAAGAAAAAGGTAAACCCAGGGAAAATTTGGT
BRIP1	BRIP1_14	chr17	59770745	59770942	ACACTGACGACATGGTTCTACATGAAGATTGTTACTAGTTTTTACTCTAAGC	TACGGTAGCAGAGACTTGGTCTCTGTCCCACTGGAAAACTGGATT	198	36	TGAAGATTGTTACTAGTTTTTACTCTAAGCCCAGCTGAGATCTTACCAGATATATAGCGACTTGGGTTATTCCTAAAGCGATCATCCACTAGAATAAGAGCTCCCCAATCATTTCTGTGTCTAATACATCTAGAAAAAATAGGGAAAAAGTCAAATAATTATAACATCGGAAATAAATCCAGTTTTCCAGTGGGACAG
BRIP1	BRIP1_15	chr17	59793184	59793369	ACACTGACGACATGGTTCTACATACCAGTTCCTATGGTTCCAGTT	TACGGTAGCAGAGACTTGGTCTCTGGCCGTCAGTGGTATGAAAT	186	35	TACCAGTTCCTATGGTTCCAGTTAAATAAAATTTTACCAAGTTTATTATAAAGAGTAAAGTAGCAAGACTAGATTTATATATATAGCCCTGTCACAGATAATATTATATTAAATTTCACTCCACTTACCTACCAAGGGCCTGGTTTAAGGCCCTGTATGCTTGAATTTCATACCACTGACGGCCAG
BRIP1	BRIP1_16	chr17	59793325	59793502	ACACTGACGACATGGTTCTACAGGTTTAAGGCCCTGTATGCTTGA	TACGGTAGCAGAGACTTGGTCTACTGTTAGAAGTTAATATGATGTTTAAAATGAGC	178	30	GGTTTAAGGCCCTGTATGCTTGAATTTCATACCACTGACGGCCAGGTAGAAGACCTCTCAATTTTGAATGGTGGTCATTGTATTGTCGTTTTAGTTCAACCtaataattttaaaatatatttaaaaaattaGTAGATAATTAAAGCTCATTTTAAACATCATATTAACTTCTAACAGT
BRIP1	BRIP1_17	chr17	59820316	59820490	ACACTGACGACATGGTTCTACAACTTTATACAAAACCAATGACTCCTGT	TACGGTAGCAGAGACTTGGTCTGCTCTCCTGGTAGCAGTTTGTC	175	40	ACTTTATACAAAACCAATGACTCCTGTAATAATAAAACTTAAGGTTTTGATGGCCTACCTGTAGATCTTTCACATTTGGAAAAGGAATTCCTATTGTTATGACAGCACGGGCATTGTCATCTGAGAAATCCAGACCCTCACTCACTTTACCACGACAAACTGCTACCAGGAGAGC
BRIP1	BRIP1_18	chr17	59820355	59820531	ACACTGACGACATGGTTCTACATAAGGTTTTGATGGCCTACCTGT	TACGGTAGCAGAGACTTGGTCTTGAGAATTTTGGATATGCTTTTTTCTGTT	177	41	TAAGGTTTTGATGGCCTACCTGTAGATCTTTCACATTTGGAAAAGGAATTCCTATTGTTATGACAGCACGGGCATTGTCATCTGAGAAATCCAGACCCTCACTCACTTTACCACGACAAACTGCTACCAGGAGAGCTCCATCTTAAACAACAGAAAAAAGCATATCCAAAATTCTCA
BRIP1	BRIP1_19	chr17	59821652	59821835	ACACTGACGACATGGTTCTACAACCCAATTTATTTTCTTTTCACTCAGG	TACGGTAGCAGAGACTTGGTCTCTGCAGGTGTACTATGACGCAAT	184	27	ACCCAATTTATTTTCTTTTCACTCAGGATTATAATTTTTCTCTTAAGTGTAATTCATCtaaaaatataaaattataattGTACCTTCTTACTTTGTAATAAAAAATATTTTTTCACCGACCATGAAATAATTTCCAGTTACCTTTCTCTCCTTTGTATTTGATTGCGTCATAGTACACCTGCAG
BRIP1	BRIP1_20	chr17	59821777	59821947	ACACTGACGACATGGTTCTACAAATAATTTCCAGTTACCTTTCTCTCCT	TACGGTAGCAGAGACTTGGTCTAGAAAAATTAAAAGAACGTTGGCTCT	171	36	AATAATTTCCAGTTACCTTTCTCTCCTTTGTATTTGATTGCGTCATAGTACACCTGCAGTAATTCATCAAAATTTGTTTTTTCTCCTCCCTGTGGTTCTACAATGACTGTCTTCACCAACTCCAGATTATGCCATAAACCAGTAGAGAGCCAACGTTCTTTTAATTTTTCT
BRIP1	BRIP1_21	chr17	59821851	59822041	ACACTGACGACATGGTTCTACATGTTTTTTCTCCTCCCTGTGGTT	TACGGTAGCAGAGACTTGGTCTCTTGCCGTAGTCACATTGGCTTA	191	36	TGTTTTTTCTCCTCCCTGTGGTTCTACAATGACTGTCTTCACCAACTCCAGATTATGCCATAAACCAGTAGAGAGCCAACGTTCTTTTAATTTTTCTAATAACTAAAGAGGGGAAAGAAAAAAATGATTTTTTGTGTGTCTAGCTAAACAAACTTAACTTCATTTGTTTAAGCCAAtgtgactacggcaag	Assays designed by relax mode and have no off-target hits
BRIP1	BRIP1_22	chr17	59853649	59853839	ACACTGACGACATGGTTCTACACCTTGTTGCCTCTACCCTAGGAA	TACGGTAGCAGAGACTTGGTCTGATGAAGTGGGAGCACTTTTGTT	191	36	CCTTGTTGCCTCTACCCTAGGAAGCTTACTGTGGTAATTTTAAAATTAGCATGCCAATGTTTAAAATGTAAATGATTATTTAAAGGCAAAAGAAACAATAAATATTCCCTTACCTTGTAAGATGGCAAGAAACACAAAATTCCTTGGCTCACAGTCTGGCACACAGATAACAAAAGTGCTCCCACTTCATC
BRIP1	BRIP1_23	chr17	59853779	59853972	ACACTGACGACATGGTTCTACAAACACAAAATTCCTTGGCTCACA	TACGGTAGCAGAGACTTGGTCTCCATGCCTTTTTCAGGCATAACT	194	43	AACACAAAATTCCTTGGCTCACAGTCTGGCACACAGATAACAAAAGTGCTCCCACTTCATCTTGGAACTCAAATGTTTCAGTATTCTGGAAGGTAGCACAGAGATTCCGACCCTTGGGGCCTGACCCAATGGTACCAACCCAAACCTAGAATATGAATATGTCATTATTAGAGTTATGCCTGAAAAAGGCATGG
BRIP1	BRIP1_24	chr17	59857534	59857732	ACACTGACGACATGGTTCTACAGGCACTTCAGGTATCTTCTAACT	TACGGTAGCAGAGACTTGGTCTACCATTGTTTTGACATCTGGTACA	199	34	GGCACTTCAGGTATCTTCTAACTTGTTTACATAGTTATATTGAAGTAGAAACACTGAAGGCCTTCCAAAAAAAAAAACAACAACTAACCTGTGAATTTTTAATGATATGATTAGCCTCCAGCTGGATAGTAAATGTAACACCAAGTTCTGACGAAAAGGATTTCATTGGTGATAATGTACCAGATGTCAAAACAATGGT
BRIP1	BRIP1_25	chr17	59857652	59857821	ACACTGACGACATGGTTCTACACAGCTGGATAGTAAATGTAACACCAA	TACGGTAGCAGAGACTTGGTCTCCACTTTGCCCAGCCTCTT	170	35	CAGCTGGATAGTAAATGTAACACCAAGTTCTGACGAAAAGGATTTCATTGGTGATAATGTACCAGATGTCAAAACAATGGTCTGAACTTTGCCATTAATATCTGAAAAGGCCTAAAAGAAAACAACATTAGATAAATAAAATTATCTTTAGAAGAggctgggcaaagtgg	Assays designed by relax mode and have no off-target hits
BRIP1	BRIP1_26	chr17	59858148	59858334	ACACTGACGACATGGTTCTACAAAATGCTGGTACTGAGCAAGAAG	TACGGTAGCAGAGACTTGGTCTAGACTTACTCCTGGACAAATCAG	187	37	AAATGCTGGTACTGAGCAAGAAGACAAAATTTCCATTTACATGATGAGCTTACCACAGCTGGATTTAAGCACCAAAAGTTTAGCACATGAACTGCAGTTTTCTGTCGTGAACGTTTCTTATTTTTTGGTAGAACCAACAACCCATTTTTGTCTGAAATATCAATCTGATTTGTCCAGGAGTAAGTCT
BRIP1	BRIP1_27	chr17	59858200	59858397	ACACTGACGACATGGTTCTACACCACAGCTGGATTTAAGCACCAA	TACGGTAGCAGAGACTTGGTCTGCCACTTAATTAGCACTTTCTTTGC	198	36	CCACAGCTGGATTTAAGCACCAAAAGTTTAGCACATGAACTGCAGTTTTCTGTCGTGAACGTTTCTTATTTTTTGGTAGAACCAACAACCCATTTTTGTCTGAAATATCAATCTGATTTGTCCAGGAGTAAGTCTGTTGAATCGCAATTTTATAATCATCTGCAAATCTAGATGCAAAGAAAGTGCTAATTAAGTGGC
BRIP1	BRIP1_28	chr17	59861524	59861722	ACACTGACGACATGGTTCTACATCAATTCTCCTATTTACTCACCCAA	TACGGTAGCAGAGACTTGGTCTGCAAGAGAAGTACCTGTTATTAGTGC	199	32	TCAATTCTCCTATTTACTCACCCAAAATAGGTATGTATTAAACACATGCTAGCATCCAAATTAGGCTATTTTTAAAAGGAAAATACATACTAGTTATCTTCACTTACCTGCTATTTTGCCTAAAAAGATAGTCAAGTACCATAAAAAGTCCTTTAAGCATTATTTGAGTTGATGCACTAATAACAGGTACTTCTCTTGC
BRIP1	BRIP1_29	chr17	59861640	59861831	ACACTGACGACATGGTTCTACATGCCTAAAAAGATAGTCAAGTACCA	TACGGTAGCAGAGACTTGGTCTAATTCCCTCCCAACCCCTCTAT	192	34	TGCCTAAAAAGATAGTCAAGTACCATAAAAAGTCCTTTAAGCATTATTTGAGTTGATGCACTAATAACAGGTACTTCTCTTGCCTCCTCTTTACCATAAATTGGTGAGATTTTTTCCTCTTTTTGAAGAACAGCAGAAAAATGTCCCTATAAGAAATTACCATATTAAGTATAGAGGGGTTGGGAGGGAATT
BRIP1	BRIP1_30	chr17	59870898	59871091	ACACTGACGACATGGTTCTACATCACGACTAAATCACTTCTAATTCACT	TACGGTAGCAGAGACTTGGTCTGTTGGTTAGAAGCAAACGCTGAA	194	34	TCACGACTAAATCACTTCTAATTCACTAAATACGTTTCACAGGTAGAAAAAATATCTTACCTGCAAAATGGGAAAAGTAGCAGTGGTGATACCCATTTTGTGTAAAGTTAAGAGCATTTCATTTCCACTCCATATTTTACAAGCTGATTCATAATCTCTTTCTACAAGATATTCAGCGTTTGCTTCTAACCAAC
BRIP1	BRIP1_31	chr17	59870964	59871141	ACACTGACGACATGGTTCTACAAATGGGAAAAGTAGCAGTGGTGA	TACGGTAGCAGAGACTTGGTCTAGTGTGTGTAAGGATGATACTGGT	178	34	AATGGGAAAAGTAGCAGTGGTGATACCCATTTTGTGTAAAGTTAAGAGCATTTCATTTCCACTCCATATTTTACAAGCTGATTCATAATCTCTTTCTACAAGATATTCAGCGTTTGCTTCTAACCAACTGAAATAAAATAAAACAATTGTGTCAACCAGTATCATCCTTACACACACT
BRIP1	BRIP1_32	chr17	59876424	59876619	ACACTGACGACATGGTTCTACAAGGCAGCACAAATACACTAATAGACA	TACGGTAGCAGAGACTTGGTCTAGCTCATAACATCGAGGACTGTG	196	42	AGGCAGCACAAATACACTAATAGACAAATCTTCTTACTTAATGAGGCTACAGCACACAGCTCGTAGGGGTTCATGATCTTTCTTCCTTATATTATTGTTGACCATACTATCTAGTTCATCCCGAGCAAACCGAAGCTGAACTTCTGTTACACTGTAACTTGCTGATTCCCGAGCACAGTCCTCGATGTTATGAGCT
BRIP1	BRIP1_33	chr17	59876538	59876725	ACACTGACGACATGGTTCTACATTCATCCCGAGCAAACCGAAG	TACGGTAGCAGAGACTTGGTCTTCTTGCCTGCTGTTGTTAAATCT	188	37	TTCATCCCGAGCAAACCGAAGCTGAACTTCTGTTACACTGTAACTTGCTGATTCCCGAGCACAGTCCTCGATGTTATGAGCTTCATCTAAAATGACAACCTGTTCTTTCAGATTTAAATCCATCTATAAGATAAAAGAATTTTCTTGTAAAACATTTGGCAAAATAGATTTAACAACAGCAGGCAAGA
BRIP1	BRIP1_34	chr17	59878556	59878732	ACACTGACGACATGGTTCTACATCAACATTTACATCTCCATGAGTAGGA	TACGGTAGCAGAGACTTGGTCTTCAGCCTGGGGAAGAAACTAAAG	177	39	TCAACATTTACATCTCCATGAGTAGGAAGAAGGTTCTCATTTTTACACATATACTCACACTTTCCCTTATTTGTGCATCTAGAAGATAGTTGTAGGGACAAAATATGATGTCAGCATCTTGTATTAGTTCTCGGGCTGTGTAATATGGACAGGCCTTTAGTTTCTTCCCCAGGCTGA
BRIP1	BRIP1_35	chr17	59878608	59878780	ACACTGACGACATGGTTCTACAACTCACACTTTCCCTTATTTGTGC	TACGGTAGCAGAGACTTGGTCTTACAGACTTTCCAAGGGATGTGC	173	42	ACTCACACTTTCCCTTATTTGTGCATCTAGAAGATAGTTGTAGGGACAAAATATGATGTCAGCATCTTGTATTAGTTCTCGGGCTGTGTAATATGGACAGGCCTTTAGTTTCTTCCCCAGGCTGACAAGTTCTTCTATATCCCAGGCTTTGCACATCCCTTGGAAAGTCTGTA
BRIP1	BRIP1_36	chr17	59878701	59878887	ACACTGACGACATGGTTCTACATGGACAGGCCTTTAGTTTCTTCC	TACGGTAGCAGAGACTTGGTCTTCCTTCTATGCTAATATTGGTTCACA	187	39	TGGACAGGCCTTTAGTTTCTTCCCCAGGCTGACAAGTTCTTCTATATCCCAGGCTTTGCACATCCCTTGGAAAGTCTGTAATGTGTGCTGATCACTAATTTTATGAACTCCATGATAAAAATAGCAGGATTTTCCCTAGAAACAAATATGCATAACTGAAATGTGAACCAATATTAGCATAGAAGGA
BRIP1	BRIP1_37	chr17	59885785	59885977	ACACTGACGACATGGTTCTACATTTCAGCCTTATTTTTTCTCTAACACA	TACGGTAGCAGAGACTTGGTCTGCTCAGATTACTAGAGAGCTCCG	193	42	TTTCAGCCTTATTTTTTCTCTAACACAAAATAACTTTACTCACGTTTTTCCCATCTAGCAATTCCATGCACTTCTCATTTCTGTTGAAGTTACCGACTACCTCAGGATGGACACAAGTATGATCCCTGCTGGAAAGAATAGTCATTGGAACCCCTGAATATGCCGTCCTCCGGAGCTCTCTAGTAATCTGAGC
BRIP1	BRIP1_38	chr17	59885880	59886077	ACACTGACGACATGGTTCTACAACTACCTCAGGATGGACACAAGT	TACGGTAGCAGAGACTTGGTCTAGGAAACAGTCAAGAGTCATCGAA	198	44	ACTACCTCAGGATGGACACAAGTATGATCCCTGCTGGAAAGAATAGTCATTGGAACCCCTGAATATGCCGTCCTCCGGAGCTCTCTAGTAATCTGAGCAATCTGCTTGTGTGTGCGTGTCCCAAAATATATTTTGGGTATCTTGGATTTCCCTGTATGATCCTTCTTAATGGTATTCGATGACTCTTGACTGTTTCCT
BRIP1	BRIP1_39	chr17	59885969	59886154	ACACTGACGACATGGTTCTACAAATCTGAGCAATCTGCTTGTGTG	TACGGTAGCAGAGACTTGGTCTTTAGATATTAGTTATCGTTTCTTTCCTTTCTT	186	40	AATCTGAGCAATCTGCTTGTGTGTGCGTGTCCCAAAATATATTTTGGGTATCTTGGATTTCCCTGTATGATCCTTCTTAATGGTATTCGATGACTCTTGACTGTTTCCTTGTTTAGTAGAACAACAGCACCTAGAACAGTGGCCAGGGGGCTGTAAGAAAGGAAAGAAACGATAACTAATATCTAA
BRIP1	BRIP1_40	chr17	59924403	59924575	ACACTGACGACATGGTTCTACATGGTTTAGAAAATTCCATATCTTCCTTC	TACGGTAGCAGAGACTTGGTCTAAACGTCATTGCTTTGGAACAGA	173	35	TGGTTTAGAAAATTCCATATCTTCCTTCTTTAAAACTGAACAATGGCATTAATACATACTTTCTGTGGCGAAAAGGAGTTTATCTTTTCCAGTGGAGAGTTGAGTTTTACAGTCTTTCCTGAATCAACTTTTGCATCCAAATTGTGTACTTCTGTTCCAAAGCAATGACGTTT
BRIP1	BRIP1_41	chr17	59924460	59924654	ACACTGACGACATGGTTCTACAACTTTCTGTGGCGAAAAGGAGTT	TACGGTAGCAGAGACTTGGTCTTTGGCCTTTGAGAACAACTAGCC	195	37	ACTTTCTGTGGCGAAAAGGAGTTTATCTTTTCCAGTGGAGAGTTGAGTTTTACAGTCTTTCCTGAATCAACTTTTGCATCCAAATTGTGTACTTCTGTTCCAAAGCAATGACGTTTTCTAATCTGTAAACACAGAACCAAAATGAAGTTTAAGGTGAACTAGAAGTTTAACTGGCTAGTTGTTCTCAAAGGCCAA
BRIP1	BRIP1_42	chr17	59926385	59926583	ACACTGACGACATGGTTCTACACACATGACCCAACTAATCTCCACA	TACGGTAGCAGAGACTTGGTCTATCTGCTAAGAAACAGGCATCCA	199	37	CACATGACCCAACTAATCTCCACAAGTGCATTAAAAACATGATACTTGACTACCATGTTCAGCTGTAACTAACTGGGTTATTTACTGCCAATAAACTCTGTTTACCTGCTGTGTAGTTTCTAAGGGTCGAATTCTTTTCTTCTCTACTTGAAAATCATCATTTTCATCTCTGTATATGGATGCCTGTTTCTTAGCAGAT
BRIP1	BRIP1_43	chr17	59926488	59926667	ACACTGACGACATGGTTCTACAACCTGCTGTGTAGTTTCTAAGGG	TACGGTAGCAGAGACTTGGTCTTGCCTACCTGTAAGTTATTTATGCT	180	35	ACCTGCTGTGTAGTTTCTAAGGGTCGAATTCTTTTCTTCTCTACTTGAAAATCATCATTTTCATCTCTGTATATGGATGCCTGTTTCTTAGCAGATAACTTTGCAGCCAGAGTGGTTTTTTCAGGGGAGTCTTATATAAGTAATTTAAAAAAAACAGCATAAATAACTTACAGGTAGGCA
BRIP1	BRIP1_44	chr17	59934384	59934576	ACACTGACGACATGGTTCTACACAGATATCAACTGACCCAGGCAA	TACGGTAGCAGAGACTTGGTCTGGGCGTAAGTGAAAAAGCTGAAG	193	39	CAGATATCAACTGACCCAGGCAAAATATAAATTACCTTGACAAGTTGATGAAGTGCCATTTCTTTCAGAAGGTGGTGTGCTTGGATAGTTGAAATGACGTGAAGTTCCTTGGTTCATGTCATTGTTTGTAAAATCCTTTGAATGGCATGCACAACAACATGACAATTGTACTTCAGCTTTTTCACTTACGCCC
BRIP1	BRIP1_45	chr17	59934521	59934692	ACACTGACGACATGGTTCTACATTGAATGGCATGCACAACAACAT	TACGGTAGCAGAGACTTGGTCTATCTTAGGAAACCTCCCAATCCT	172	36	TTGAATGGCATGCACAACAACATGACAATTGTACTTCAGCTTTTTCACTTACGCCCTCATCTGCTGGTTTCCCTAAAAATGAAAGAACATCTATTTATAATATATCTAATTAAATAAACATCAATCATTCTCTACAGcccagttcacccaggattgggaggtttcctaagat	One primer sits in the repeat region
BRIP1	BRIP1_46	chr17	59937072	59937266	ACACTGACGACATGGTTCTACAGGCTGAACCAGTCTGGATAAAGAA	TACGGTAGCAGAGACTTGGTCTTCTCAGAGGATTAAACAGCAAGCA	195	39	GGCTGAACCAGTCTGGATAAAGAATACTGTATTATATTTTCTCAGATCCCAGTAAGTAACCTGAAGATATCAAGCAACTACTTACCACTAAGAGATTGTTGCCATGCTAAAGCAGAACAAAGTAAGGCTAAGCTTTTTCCACTTCCTGTGGGACTCTCCAACAAACAATGTTGCTTGCTGTTTAATCCTCTGAGA
BRIP1	BRIP1_47	chr17	59937167	59937338	ACACTGACGACATGGTTCTACATTGTTGCCATGCTAAAGCAGAAC	TACGGTAGCAGAGACTTGGTCTAACTTCAGATGGAGAGAGACCTT	172	36	TTGTTGCCATGCTAAAGCAGAACAAAGTAAGGCTAAGCTTTTTCCACTTCCTGTGGGACTCTCCAACAAACAATGTTGCTTGCTGTTTAATCCTCTGAGAATCTATGAACACAGAAACCAATGAAAATAATAAACATATTAACTTTATAAAGGTCTCTCTCCATCTGAAGTT
BRIP1	BRIP1_48	chr17	59938762	59938932	ACACTGACGACATGGTTCTACAAAGTATCTATATCTTAATAAAAACTTAACTGCTGAA	TACGGTAGCAGAGACTTGGTCTAGTTAGGAATCTGAAATAAACAGGAAAGC	171	33	AAGTATCTATATCTTAATAAAAACTTAACTGCTGAAAAATACTTACAGAATTCATCATAGCAAGCTGTGACGGGTAAGCTTTATAAGGAAAGTAAATCTTCACCCCACCAATTGTATATTCAGACCACATTGAAGACATAGTGCTTTCCTGTTTATTTCAGATTCCTAACT
CDH1	CDH1_1	chr16	68771204	68771397	ACACTGACGACATGGTTCTACAGGAACTGCAAAGCACCTGTGA	TACGGTAGCAGAGACTTGGTCTCGTCCCTCGCAAGTCAGG	194	71	GGAACTGCAAAGCACCTGTGAGCTTGCGGAAGTCAGTTCAGACTccagcccgctccagcccggcccgacccgaccgcacccggcgcctgccctcgctcggcGTCCCCGGCCAGCCATGGGCCCTTGGAGCCGCAGCCTCTCGGCGCTGCTGCTGCTGCTGCAGGTACCCCGGATCCCCTGACTTGCGAGGGACG
CDH1	CDH1_2	chr16	68772173	68772367	ACACTGACGACATGGTTCTACAGTTCCATCTACCTTTCCCCCAC	TACGGTAGCAGAGACTTGGTCTCCCTTTCCAACCCCTCCCT	195	69	GTTCCATCTACCTTTCCCCCACCCCAGGTCTCCTCTTGGCTCTGCCAGGAGCCGGAGCCCTGCCACCCTGGCTTTGACGCCGAGAGCTACACGTTCACGGTGCCCCGGCGCCACCTGGAGAGAGGCCGCGTCCTGGGCAGAGGTGAGGGCGCGCTGCCGGTGTCCCTGGGCGGAGTAGGGAGGGGTTGGAAAGGG
CDH1	CDH1_3	chr16	68835492	68835683	ACACTGACGACATGGTTCTACACACAAGTTCGCTCTTTGGAGAAG	TACGGTAGCAGAGACTTGGTCTGAAACCGTAGAGGCCTTTTGACT	192	45	CACAAGTTCGCTCTTTGGAGAAGGAATGCTCTTGTCTTTAATCTGTCCAATTTCCTAATCTCTGTGATTTCTGCCCTGCAGTGAATTTTGAAGATTGCACCGGTCGACAAAGGACAGCCTATTTTTCCCTCGACACCCGATTCAAAGTGGGCACAGATGGTGTGATTACAGTCAAAAGGCCTCTACGGTTTC
CDH1	CDH1_4	chr16	68835559	68835737	ACACTGACGACATGGTTCTACATTTCTGCCCTGCAGTGAATTTTG	TACGGTAGCAGAGACTTGGTCTACTTTCTGTAGGTGGAGTCCCAG	179	48	TTTCTGCCCTGCAGTGAATTTTGAAGATTGCACCGGTCGACAAAGGACAGCCTATTTTTCCCTCGACACCCGATTCAAAGTGGGCACAGATGGTGTGATTACAGTCAAAAGGCCTCTACGGTTTCATAACCCACAGATCCATTTCTTGGTCTACGCCTGGGACTCCACCTACAGAAAGT
CDH1	CDH1_5	chr16	68835676	68835854	ACACTGACGACATGGTTCTACAACGGTTTCATAACCCACAGATCC	TACGGTAGCAGAGACTTGGTCTccTGGATTAGACAGCGCACTAAA	179	51	ACGGTTTCATAACCCACAGATCCATTTCTTGGTCTACGCCTGGGACTCCACCTACAGAAAGTTTTCCACCAAAGTCACGCTGAATACAGTGGGGCACCACCACCGCCCCCCGCCCCATCAGGTATGTTGGCATTTTTCTGAGAAGTTCGCTGTTGTTTTAGTGCGCTGTCTAATCCAgg	One primer sits in the repeat region
CDH1	CDH1_6	chr16	68842255	68842450	ACACTGACGACATGGTTCTACAAGGTTGGACTGTTAGACCTGAAG	TACGGTAGCAGAGACTTGGTCTATGGGCCTTTTTCATTTTCTGGG	196	46	AGGTTGGACTGTTAGACCTGAAGTATCCGTCTTGAATTGTCTTATCTTGTTCCTCATCTTCTTTCCTTTTAGGCCTCCGTTTCTGGAATCCAAGCAGAATTGCTCACATTTCCCAACTCCTCTCCTGGCCTCAGAAGACAGAAGAGAGACTGGGTTATTCCTCCCATCAGCTGCCCAGAAAATGAAAAAGGCCCAT
CDH1	CDH1_7	chr16	68842311	68842506	ACACTGACGACATGGTTCTACATCTTCTTTCCTTTTAGGCCTCCG	TACGGTAGCAGAGACTTGGTCTATCCCTCCCAGAGAAACAGAGAA	196	46	TCTTCTTTCCTTTTAGGCCTCCGTTTCTGGAATCCAAGCAGAATTGCTCACATTTCCCAACTCCTCTCCTGGCCTCAGAAGACAGAAGAGAGACTGGGTTATTCCTCCCATCAGCTGCCCAGAAAATGAAAAAGGCCCATTTCCTAAAAACCTGGTTCAGGTAGAGAAAGAAGTTCTCTGTTTCTCTGGGAGGGAT
CDH1	CDH1_8	chr16	68842543	68842740	ACACTGACGACATGGTTCTACACCCAGTGTTGGGATCCTTCTTTA	TACGGTAGCAGAGACTTGGTCTCAATGCGTTCTCTATCCAGAGGC	198	43	CCCAGTGTTGGGATCCTTCTTTACTAATTCTTTTTCTTTCATTTTGTCTTCAGATCAAATCCAACAAAGACAAAGAAGGCAAGGTTTTCTACAGCATCACTGGCCAAGGAGCTGACACACCCCCTGTTGGTGTCTTTATTATTGAAAGAGAAACAGGATGGCTGAAGGTGACAGAGCCTCTGGATAGAGAACGCATTG
CDH1	CDH1_9	chr16	68842616	68842805	ACACTGACGACATGGTTCTACAAGAAGGCAAGGTTTTCTACAGCA	TACGGTAGCAGAGACTTGGTCTAAAATCCTGGGTGGATGTTACCC	190	47	AGAAGGCAAGGTTTTCTACAGCATCACTGGCCAAGGAGCTGACACACCCCCTGTTGGTGTCTTTATTATTGAAAGAGAAACAGGATGGCTGAAGGTGACAGAGCCTCTGGATAGAGAACGCATTGCCACATACACTGTAAGTATCTCTTAGAAGCTTGTTGACACCGGGGTAACATCCACCCAGGATTTT
CDH1	CDH1_10	chr16	68844040	68844225	ACACTGACGACATGGTTCTACACCCTTCTCCCATGTTTTCTTCCT	TACGGTAGCAGAGACTTGGTCTGACAGACCCCTTAAAGACCTCCT	186	49	CCCTTCTCCCATGTTTTCTTCCTCATCAGAGCTCAAGTCACCCTCACTTGGTTCTTTCAGCTCTTCTCTCACGCTGTGTCATCCAACGGGAATGCAGTTGAGGATCCAATGGAGATTTTGATCACGGTAACCGATCAGAATGACAACAAGCCCGAATTCACCCAGGAGGTCTTTAAGGGGTCTGTC
CDH1	CDH1_11	chr16	68844112	68844304	ACACTGACGACATGGTTCTACAGCTGTGTCATCCAACGGGAAT	TACGGTAGCAGAGACTTGGTCTTTGGGGTCCAAAGAACCTAAGAG	193	46	GCTGTGTCATCCAACGGGAATGCAGTTGAGGATCCAATGGAGATTTTGATCACGGTAACCGATCAGAATGACAACAAGCCCGAATTCACCCAGGAGGTCTTTAAGGGGTCTGTCATGGAAGGTGCTCTTCCAGGTATATCCACTAATGAGAATCTGAATACTCAGAAAGACTCTTAGGTTCTTTGGACCCCAA
CDH1	CDH1_12	chr16	68845504	68845699	ACACTGACGACATGGTTCTACATCAGGGCAGAATTGGATTAAGCA	TACGGTAGCAGAGACTTGGTCTATTTTTGTCAGGGAGCTCAGGAT	196	50	TCAGGGCAGAATTGGATTAAGCAGTATTGACCCAGTCCCAAAGTGCAGCTTGTCTAAACCTTCATCTCCTTGAACTCTTCCAGGAACCTCTGTGATGGAGGTCACAGCCACAGACGCGGACGATGATGTGAACACCTACAATGCCGCCATCGCTTACACCATCCTCAGCCAAGATCCTGAGCTCCCTGACAAAAAT
CDH1	CDH1_13	chr16	68845620	68845808	ACACTGACGACATGGTTCTACACGGACGATGATGTGAACACCTAC	TACGGTAGCAGAGACTTGGTCTATACACATTTGTCCTCCACACCC	189	52	CGGACGATGATGTGAACACCTACAATGCCGCCATCGCTTACACCATCCTCAGCCAAGATCCTGAGCTCCCTGACAAAAATATGTTCACCATTAACAGGAACACAGGAGTCATCAGTGTGGTCACCACTGGGCTGGACCGAGAGGTCAGGGGTCAGGAGGATCCAGAGGGTGTGGAGGACAAATGTGTAT
CDH1	CDH1_14	chr16	68846009	68846207	ACACTGACGACATGGTTCTACACTGACTTGGTTGTGTCGATCTCT	TACGGTAGCAGAGACTTGGTCTAGACCTTTCTTTGGAAACCCTCT	199	48	CTGACTTGGTTGTGTCGATCTCTCTGCAGAGTTTCCCTACGTATACCCTGGTGGTTCAAGCTGCTGACCTTCAAGGTGAGGGGTTAAGCACAACAGCAACAGCTGTGATCACAGTCACTGACACCAACGATAATCCTCCGATCTTCAATCCCACCACGGTAATTCTATAACTCCTTAGAGGGTTTCCAAAGAAAGGTCT
CDH1	CDH1_15	chr16	68847186	68847375	ACACTGACGACATGGTTCTACATTGTAAATGACACATCTCTTTGCTC	TACGGTAGCAGAGACTTGGTCTCGTTGTTCACTGGATTTGTGGTG	190	48	TTGTAAATGACACATCTCTTTGCTCTGCAGTACAAGGGTCAGGTGCCTGAGAACGAGGCTAACGTCGTAATCACCACACTGAAAGTGACTGATGCTGATGCCCCCAATACCCCAGCGTGGGAGGCTGTATACACCATATTGAATGATGATGGTGGACAATTTGTCGTCACCACAAATCCAGTGAACAACG
CDH1	CDH1_16	chr16	68847247	68847426	ACACTGACGACATGGTTCTACAACGTCGTAATCACCACACTGAAA	TACGGTAGCAGAGACTTGGTCTTCTGCATCTTGCCAGGTACCATA	180	46	ACGTCGTAATCACCACACTGAAAGTGACTGATGCTGATGCCCCCAATACCCCAGCGTGGGAGGCTGTATACACCATATTGAATGATGATGGTGGACAATTTGTCGTCACCACAAATCCAGTGAACAACGATGGCATTTTGAAAACAGCAAAGGTTTGTATGGTACCTGGCAAGATGCAGA
CDH1	CDH1_17	chr16	68849329	68849514	ACACTGACGACATGGTTCTACAACCAAAAGCAACAGTTAAGGATTT	TACGGTAGCAGAGACTTGGTCTCGGTGGCTGTGGAGGT	186	40	ACCAAAAGCAACAGTTAAGGATTTAATTTTATTTTTACTAACACAAAATGTTTCGTTTTGTTTTTAACTTCATTGTTTCTGCTCTCTAGGGCTTGGATTTTGAGGCCAAGCAGCAGTACATTCTACACGTAGCAGTGACGAATGTGGTACCTTTTGAGGTCTCTCTCACCACCTCCACAGCCACCG
CDH1	CDH1_18	chr16	68849450	68849630	ACACTGACGACATGGTTCTACATCTACACGTAGCAGTGACGAATG	TACGGTAGCAGAGACTTGGTCTCTGGGCAGTGTAGGATGTGATTT	181	54	TCTACACGTAGCAGTGACGAATGTGGTACCTTTTGAGGTCTCTCTCACCACCTCCACAGCCACCGTCACCGTGGATGTGCTGGATGTGAATGAAGCCCCCATCTTTGTGCCTCCTGAAAAGAGAGTGGAAGTGTCCGAGGACTTTGGCGTGGGCCAGGAAATCACATCCTACACTGCCCAG
CDH1	CDH1_19	chr16	68849521	68849699	ACACTGACGACATGGTTCTACATGGATGTGCTGGATGTGAATGAA	TACGGTAGCAGAGACTTGGTCTAGTTGCTGCAAGTCAGTTGAAAA	179	48	TGGATGTGCTGGATGTGAATGAAGCCCCCATCTTTGTGCCTCCTGAAAAGAGAGTGGAAGTGTCCGAGGACTTTGGCGTGGGCCAGGAAATCACATCCTACACTGCCCAGGAGCCAGACACATTTATGGAACAGAAAATAACGTAAGTGTGAGGATTTTTCAACTGACTTGCAGCAACT
CDH1	CDH1_20	chr16	68853127	68853314	ACACTGACGACATGGTTCTACACAGCTACATGTTGTTTGCTGGTC	TACGGTAGCAGAGACTTGGTCTATGATTAGGGCTGTGTACGTGCT	188	51	CAGCTACATGTTGTTTGCTGGTCCTATTCTAAAAGCCAGAGCTTGTCCCCGTTCAGATATCGGATTTGGAGAGACACTGCCAACTGGCTGGAGATTAATCCGGACACTGGTGCCATTTCCACTCGGGCTGAGCTGGACAGGGAGGATTTTGAGCACGTGAAGAACAGCACGTACACAGCCCTAATCAT
CDH1	CDH1_21	chr16	68853191	68853363	ACACTGACGACATGGTTCTACATTTGGAGAGACACTGCCAACTG	TACGGTAGCAGAGACTTGGTCTTCGAGGCAGCAAAGGCTC	173	53	TTTGGAGAGACACTGCCAACTGGCTGGAGATTAATCCGGACACTGGTGCCATTTCCACTCGGGCTGAGCTGGACAGGGAGGATTTTGAGCACGTGAAGAACAGCACGTACACAGCCCTAATCATAGCTACAGACAATGGTAAGGGGGCCTCATCTGAGCCTTTGCTGCCTCGA
CDH1	CDH1_22	chr16	68855825	68856023	ACACTGACGACATGGTTCTACACTAGACTTGGTCTGGTGGAAGGC	TACGGTAGCAGAGACTTGGTCTCCTGAGGCTTTGGATTCCTCTC	199	47	CTAGACTTGGTCTGGTGGAAGGCAATGGGGATTCATTACTGTTGCCAAGCTGCCACATTTTCTGTGTATTTTCTCTTAGGTTCTCCAGTTGCTACTGGAACAGGGACACTTCTGCTGATCCTGTCTGATGTGAATGACAACGCCCCCATACCAGAACCTCGAACTATATTCTTCTGTGAGAGGAATCCAAAGCCTCAGG
CDH1	CDH1_23	chr16	68855936	68856128	ACACTGACGACATGGTTCTACACTGCTGATCCTGTCTGATGTGAA	TACGGTAGCAGAGACTTGGTCTTTGGGTCGTTGTACTGAATGGTC	193	49	CTGCTGATCCTGTCTGATGTGAATGACAACGCCCCCATACCAGAACCTCGAACTATATTCTTCTGTGAGAGGAATCCAAAGCCTCAGGTCATAAACATCATTGATGCAGACCTTCCTCCCAATACATCTCCCTTCACAGCAGAACTAACACACGGGGCGAGTGCCAACTGGACCATTCAGTACAACGACCCAA
CDH1	CDH1_24	chr16	68855996	68856167	ACACTGACGACATGGTTCTACATTCTGTGAGAGGAATCCAAAGCC	TACGGTAGCAGAGACTTGGTCTGTTGGAGCAAAGTTGCCAAAATA	172	48	TTCTGTGAGAGGAATCCAAAGCCTCAGGTCATAAACATCATTGATGCAGACCTTCCTCCCAATACATCTCCCTTCACAGCAGAACTAACACACGGGGCGAGTGCCAACTGGACCATTCAGTACAACGACCCAAGTGGGTACCTGAGTTTTATTTTGGCAACTTTGCTCCAAC
CDH1	CDH1_25	chr16	68857246	68857416	ACACTGACGACATGGTTCTACATGAGCTTTTTATTTTCCTCCCCTG	TACGGTAGCAGAGACTTGGTCTCTGACCTCTAAGGTGGTCACTTG	171	41	TGAGCTTTTTATTTTCCTCCCCTGGTCTCATCATTTCTTTTTATTGCTTTCTCCAGCCCAAGAATCTATCATTTTGAAGCCAAAGATGGCCTTAGAGGTGGGTGACTACAAAATCAATCTCAAGCTCATGGATAACCAGAATAAAGACCAAGTGACCACCTTAGAGGTCAG
CDH1	CDH1_26	chr16	68857294	68857487	ACACTGACGACATGGTTCTACATTCTCCAGCCCAAGAATCTATCA	TACGGTAGCAGAGACTTGGTCTGAATTTGCAATCCTGCTTCGACA	194	48	TTCTCCAGCCCAAGAATCTATCATTTTGAAGCCAAAGATGGCCTTAGAGGTGGGTGACTACAAAATCAATCTCAAGCTCATGGATAACCAGAATAAAGACCAAGTGACCACCTTAGAGGTCAGCGTGTGTGACTGTGAAGGGGCCGCTGGCGTCTGTAGGAAGGCACAGCCTGTCGAAGCAGGATTGCAAATTC
CDH1	CDH1_27	chr16	68857405	68857594	ACACTGACGACATGGTTCTACACTTAGAGGTCAGCGTGTGTGACT	TACGGTAGCAGAGACTTGGTCTTCCAGGAAATAAACCTCCTCCATTT	190	49	CTTAGAGGTCAGCGTGTGTGACTGTGAAGGGGCCGCTGGCGTCTGTAGGAAGGCACAGCCTGTCGAAGCAGGATTGCAAATTCCTGCCATTCTGGGGATTCTTGGAGGAATTCTTGCTTTGCTAAGTAAGTCCAGCTGGCAAGTGACTCAGCCTTTGACTTAAAAAAATGGAGGAGGTTTATTTCCTGGA
CDH1	CDH1_28	chr16	68862014	68862197	ACACTGACGACATGGTTCTACAGCTGCTTCTGGCCTTCTTTATCT	TACGGTAGCAGAGACTTGGTCTTCTCCGCCTCCTTCTTCATCATA	184	53	GCTGCTTCTGGCCTTCTTTATCTTTGGCTCTCAACACTTGCTCTGTCTCCCCCACCATCCCAGTTCTGATTCTGCTGCTCTTGCTGTTTCTTCGGAGGAGAGCGGTGGTCAAAGAGCCCTTACTGCCCCCAGAGGATGACACCCGGGACAACGTTTATTACTATGATGAAGAAGGAGGCGGAGA
CDH1	CDH1_29	chr16	68862066	68862238	ACACTGACGACATGGTTCTACACACCATCCCAGTTCTGATTCTGC	TACGGTAGCAGAGACTTGGTCTCCACTGAGCTACCAAGGTTTTCA	173	53	CACCATCCCAGTTCTGATTCTGCTGCTCTTGCTGTTTCTTCGGAGGAGAGCGGTGGTCAAAGAGCCCTTACTGCCCCCAGAGGATGACACCCGGGACAACGTTTATTACTATGATGAAGAAGGAGGCGGAGAAGAGGACCAGGTGGGTTTTGAAAACCTTGGTAGCTCAGTGG
CDH1	CDH1_30	chr16	68863488	68863683	ACACTGACGACATGGTTCTACAAACATAGCCCTGTGTGTATGACT	TACGGTAGCAGAGACTTGGTCTCAATTTCATCGGGATTGGCAGGG	196	51	AACATAGCCCTGTGTGTATGACTATTTCTTTCCTACTCTTCATTGTACTTCAACCTTTTTTCTCCAAAGGACTTTGACTTGAGCCAGCTGCACAGGGGCCTGGACGCTCGGCCTGAAGTGACTCGTAACGACGTTGCACCAACCCTCATGAGTGTCCCCCGGTATCTTCCCCGCCCTGCCAATCCCGATGAAATTG
CDH1	CDH1_31	chr16	68863537	68863735	ACACTGACGACATGGTTCTACATCAACCTTTTTTCTCCAAAGGACT	TACGGTAGCAGAGACTTGGTCTGAGCCATGCTTTGGCTTTCC	199	51	TCAACCTTTTTTCTCCAAAGGACTTTGACTTGAGCCAGCTGCACAGGGGCCTGGACGCTCGGCCTGAAGTGACTCGTAACGACGTTGCACCAACCCTCATGAGTGTCCCCCGGTATCTTCCCCGCCCTGCCAATCCCGATGAAATTGGAAATTTTATTGATGAAGTAAGTAATCCACGTGGAAAGCCAAAGCATGGCTC
CDH1	CDH1_32	chr16	68867135	68867328	ACACTGACGACATGGTTCTACACAGATGACAGGTGTGCCCTTC	TACGGTAGCAGAGACTTGGTCTAGTCCTGGTCTTTGTCTGACTCT	194	49	CAGATGACAGGTGTGCCCTTCCTTTCACTAAAAGATGCTTTTGTCCCTTCTTCTTTAGAATCTGAAAGCGGCTGATACTGACCCCACAGCCCCGCCTTATGATTCTCTGCTCGTGTTTGACTATGAAGGAAGCGGTTCCGAAGCTGCTAGTCTGAGCTCCCTGAACTCCTCAGAGTCAGACAAAGACCAGGACT
CDH1	CDH1_33	chr16	68867194	68867366	ACACTGACGACATGGTTCTACAATCTGAAAGCGGCTGATACTGAC	TACGGTAGCAGAGACTTGGTCTCTTCTTGAAGCGATTGCCCCATT	173	51	ATCTGAAAGCGGCTGATACTGACCCCACAGCCCCGCCTTATGATTCTCTGCTCGTGTTTGACTATGAAGGAAGCGGTTCCGAAGCTGCTAGTCTGAGCTCCCTGAACTCCTCAGAGTCAGACAAAGACCAGGACTATGACTACTTGAACGAATGGGGCAATCGCTTCAAGAAG
CDH1	CDH1_34	chr16	68867304	68867490	ACACTGACGACATGGTTCTACATCAGAGTCAGACAAAGACCAGGA	TACGGTAGCAGAGACTTGGTCTCTCAAGGGAAGGGAGCTGAAAAA	187	55	TCAGAGTCAGACAAAGACCAGGACTATGACTACTTGAACGAATGGGGCAATCGCTTCAAGAAGCTGGCTGACATGTACGGAGGCGGCGAGGACGACTAGGGGACTCGAGAGAGGCGGGCCCCAGACCCATGTGCTGGGAAATGCAGAAATCACGTTGCTGGTGGTTTTTCAGCTCCCTTCCCTTGAG
CHEK2	CHEK2_1	chr22	29083764	29083961	ACACTGACGACATGGTTCTACATGACTGTGAAAAAGCAATTATTCCCATA	TACGGTAGCAGAGACTTGGTCTGAAAGCGGCCCCGTGAAG	198	44	TGACTGTGAAAAAGCAATTATTCCCATAATTAAAATACAAACTATAAAAAAACAGACTCAAAGAAAAGAAAGATGACAGAGTGAAAGAAGGTACATTTCTTTCGTGTTCAAACCACGGAGTTCACAACACAGCAGCACACACAGCTGGGCGCTTTGTGGTCTCGGCACCCTCGGCTTCCCCTTCACGGGGCCGCTTTC
CHEK2	CHEK2_2	chr22	29083883	29084080	ACACTGACGACATGGTTCTACAGTTCACAACACAGCAGCACAC	TACGGTAGCAGAGACTTGGTCTACATCAAATGCCCCCACTTTACT	198	46	GTTCACAACACAGCAGCACACACAGCTGGGCGCTTTGTGGTCTCGGCACCCTCGGCTTCCCCTTCACGGGGCCGCTTTCGACTAGTAGAAGGCTGAAAATAAAGGAAAATGGAGAAATGTTCAAAAGAAAATCACTGGCTTCTTTAAGATTATCAAAGTTCCTCAATATGCTTCCAGTAAAGTGGGGGCATTTGATGT	Multiple hits
CHEK2	CHEK2_3	chr22	29084970	29085168	ACACTGACGACATGGTTCTACATGGAGCGAATCAAGTTAAAACAGAG	TACGGTAGCAGAGACTTGGTCTGTCTGAGGAAAATGAATCCACAGC	199	39	TGGAGCGAATCAAGTTAAAACAGAGTTTCTACTACATTATAACTGAAACAATGTTAAGCAATTGCTACTCAGGAAAATCTTGAATTTCATCATCTTTGCTTATCAGCTCCTTAAGCCCAGACTACATTTAGTGATCATCAGGAATACGAATACCTGGGCTAGAACCTGGGGTAGAGCTGTGGATTCATTTTCCTCAGAC
CHEK2	CHEK2_4	chr22	29085114	29085309	ACACTGACGACATGGTTCTACATACGAATACCTGGGCTAGAACCT	TACGGTAGCAGAGACTTGGTCTGACGGACATTTTTCCTCCCTCTT	196	44	TACGAATACCTGGGCTAGAACCTGGGGTAGAGCTGTGGATTCATTTTCCTCAGACAGAAGATCTTGAAACTTTCTCTTCATGTCTTCATCCTGTGAGGGAATTAAAAACATAAGTAGCTGTGTCTGAAGGATAATAAACTCCTAGAATGACAGGGCTAGCATGCCCCTGTGGAAAGAGGGAGGAAAAATGTCCGTC
CHEK2	CHEK2_5	chr22	29089906	29090095	ACACTGACGACATGGTTCTACAACAATTAGATTAAACACTCAACAAAGTAAACA	TACGGTAGCAGAGACTTGGTCTTGTCAAGAAGTTGTTGGTAGTGGA	190	46	ACAATTAGATTAAACACTCAACAAAGTAAACATGTTTCTGTCCTCTGTCTCATGTCTCTCAGGCAGCAGGGCTTCCCATGTATTTTATGCTAGCAGGCACTGTCCCACACCCACCTGAAGCCACGGGTGTCTTAAGGCTTCTTCTGTCGTAAAACGTGCCTTTGGATCCACTACCAACAACTTCTTGACA
CHEK2	CHEK2_6	chr22	29090007	29090205	ACACTGACGACATGGTTCTACAGTCCCACACCCACCTGAAG	TACGGTAGCAGAGACTTGGTCTCCTCTCTGCTCTTTCTGAATGGT	199	45	GTCCCACACCCACCTGAAGCCACGGGTGTCTTAAGGCTTCTTCTGTCGTAAAACGTGCCTTTGGATCCACTACCAACAACTTCTTGACAAGGTCCAGAGCTAAAGCAACAATTGGGCAAATCACAGTGAAAAGGATAAATATATTATCAGTAAGAGTATGCCAGAATTAACAGGCCACCATTCAGAAAGAGCAGAGAGG
CHEK2	CHEK2_7	chr22	29091055	29091242	ACACTGACGACATGGTTCTACACCACCACAGCACATACACATTTT	TACGGTAGCAGAGACTTGGTCTACCAATATTAAGCCTTAGTGGGTATC	188	41	CCACCACAGCACATACACATTTTAGCATACCACAAATTCTTAACCCTTTCATATTCATACCTTTCTCTGAGACTTCTGCCCAGACTTCAGGAATGAAGTTGTATTTTCCACTGGTGATCTGATCCTTCAGTGACACTTGAGTCCTATGCTCAGAGAAAGGTGGATACCCACTAAGGCTTAATATTGGT
CHEK2	CHEK2_8	chr22	29091127	29091297	ACACTGACGACATGGTTCTACACTTCTGCCCAGACTTCAGGAATG	TACGGTAGCAGAGACTTGGTCTTTTATATCTGAATGCCACTGAGAATGCC	171	42	CTTCTGCCCAGACTTCAGGAATGAAGTTGTATTTTCCACTGGTGATCTGATCCTTCAGTGACACTTGAGTCCTATGCTCAGAGAAAGGTGGATACCCACTAAGGCTTAATATTGGTAGAGAGAGAAAGGAAAAGAAATCAAGTGGCATTCTCAGTGGCATTCAGATATAAA
CHEK2	CHEK2_9	chr22	29091641	29091818	ACACTGACGACATGGTTCTACATGTGACTTCATCTAATCACCTCCT	TACGGTAGCAGAGACTTGGTCTTCATGAGAACCTTATGTGGAACC	178	44	TGTGACTTCATCTAATCACCTCCTACCAGTCTGTGCAGCAATGAAAATATTTCTTACCAGATAAAAAGAATAACTCCTAAACTCCAGCAGTCCACAGCACGGTTATACCCAGCAGTCCCAACAGAAACAAGAACTTCAGGCGCCAAGTAGGTGGGGGTTCCACATAAGGTTCTCATGA
CHEK2	CHEK2_10	chr22	29091714	29091901	ACACTGACGACATGGTTCTACACTCCTAAACTCCAGCAGTCCAC	TACGGTAGCAGAGACTTGGTCTTGGCAAGTTCAACATTATTCCCT	188	46	CTCCTAAACTCCAGCAGTCCACAGCACGGTTATACCCAGCAGTCCCAACAGAAACAAGAACTTCAGGCGCCAAGTAGGTGGGGGTTCCACATAAGGTTCTCATGAGAGAGGTCTCTCCCAAAATCTTGGAGTGCCCAAAATCAGTAATCTAAAATTCAGTACAAAAGGGAATAATGTTGAACTTGCCA
CHEK2	CHEK2_11	chr22	29092834	29093019	ACACTGACGACATGGTTCTACAAGTTTCTGAACAAGAATCTACAGGA	TACGGTAGCAGAGACTTGGTCTATCTACTGCATGAATCTGAGGGT	186	39	AGTTTCTGAACAAGAATCTACAGGAATAGCCACATACAGAATGCCAATTTCTTACCTTTATAAGACAGTCCTCTTCTTGAGATGACAGTAAAACATTCTCTGGCTTTAAGTCACGGTGTATAATACCGTTTTCATGAAGGTACTACACAGAAAGGCAGGCATGACCCTCAGATTCATGCAGTAGAT
CHEK2	CHEK2_12	chr22	29095758	29095954	ACACTGACGACATGGTTCTACATGCCTAATTCAGGGAGTAATTCAAC	TACGGTAGCAGAGACTTGGTCTGAACCCCTTGCCTTGCCTTT	197	46	TGCCTAATTCAGGGAGTAATTCAACTAAAAGAAAGGCAGCTGTCAAAAGAATTGAGGGCTTCTTTTACCTGCACAGCCAAGAGCATCTGGTAAAAATAGAGCTTGCAGGTAGCTTCTTTCAGGCGTTTATTCCCCACCACTTTGTCAAACAGCTCTCCCCCTTCCATCCTGAAACACAAAGGCAAGGCAAGGGGTTC
CHEK2	CHEK2_13	chr22	29099400	29099584	ACACTGACGACATGGTTCTACACAGGATGAGAAAGGCAAGCCTAC	TACGGTAGCAGAGACTTGGTCTACTTTCCCTTTTTTCTCCCCCTC	185	32	CAGGATGAGAAAGGCAAGCCTACATTAGATTCTTTGGTGGCTTTATAAAGCATTTGAATGGAAACAGAAATTTTTAAAAAGTTTACTACTTACAATTCCAAAACAATATAATAATCTTCTGCATCAAAAAAGTTTTTAATCTTGATGATGCAAGGCTAAGAAGAGGGGGAGAAAAAAGGGAAAGT
CHEK2	CHEK2_14	chr22	29105921	29106070	ACACTGACGACATGGTTCTACAACTGAAAGGCTTTATACTCTTCTCATATT	TACGGTAGCAGAGACTTGGTCTCTCTGTTATTCTGTTTATCAAAGGACCC	150	29	ACTGAAAGGCTTTATACTCTTCTCATATTTTGAGATAGATAAATCTAAGTATGAGTCATATAATAATACTTACATGATTTAGCTTTTTCAAAATTTCTATTTCTGTTTCAACATTGAGAGCTGGGTCCTTTGATAAACAGAATAACAGAG
CHEK2	CHEK2_15	chr22	29105986	29106135	ACACTGACGACATGGTTCTACAATACTTACATGATTTAGCTTTTTCAAAATTTCTATT	TACGGTAGCAGAGACTTGGTCTCTTGAGTCAACTGAGTTTAACTGTAAATGTTTTT	150	27	ATACTTACATGATTTAGCTTTTTCAAAATTTCTATTTCTGTTTCAACATTGAGAGCTGGGTCCTTTGATAAACAGAATAACAGAGTTTATTAGTAATAATAATTGCCAATATTTAAAAAAACATTTACAGTTAAACTCAGTTGACTCAAG
CHEK2	CHEK2_16	chr22	29107772	29107951	ACACTGACGACATGGTTCTACAACTCACAAATTCATCCATCTAAGCA	TACGGTAGCAGAGACTTGGTCTAGCCATAAAGATCATCAGCAAAAGG	180	36	ACTCACAAATTCATCCATCTAAGCAGGGGGTTATTCCTGAGTTTAAAAATCATCAATCTAAGATTATTTTGGGAAGTTATGAAGACGTGTTAATAAAAGGTGATCAGCCTTTTATTGGTACTTACTGCCTCTCTTGCTGAACCAATAGCAAACTTCCTTTTGCTGATGATCTTTATGGCT
CHEK2	CHEK2_17	chr22	29107873	29108071	ACACTGACGACATGGTTCTACAGATCAGCCTTTTATTGGTACTTACTG	TACGGTAGCAGAGACTTGGTCTCCCAGGAGTGGTAGGTCTCATA	199	41	GATCAGCCTTTTATTGGTACTTACTGCCTCTCTTGCTGAACCAATAGCAAACTTCCTTTTGCTGATGATCTTTATGGCTACTTTCTTACATGTTTTCCTCTCGAAAGCCAGCTTTACCTCTCCACAGGCACCACTAGAGGGAAAAACAAAGATAGTGATTGTCTGAATGTTTTTAATTATGAGACCTACCACTCCTGGG
CHEK2	CHEK2_18	chr22	29115310	29115504	ACACTGACGACATGGTTCTACACAGAAATGAGAAACCACCAATCACA	TACGGTAGCAGAGACTTGGTCTTGAAACCCATTTCTACTCTTTTCTTC	195	30	CAGAAATGAGAAACCACCAATCACAAATGTATAGTGAAAAAATTAAGTGCATTTATATAAGAAAATAATTTACCTTCCAAGAGTTTTTGACATGATGTATTCATCTCTTAATGCCTTAGGATAAACTGACTGATCATCTACAGTCAGATCAAAAAAGACAAAAACTAAGGAAGAAAAGAGTAGAAATGGGTTTCA
CHEK2	CHEK2_19	chr22	29120878	29121073	ACACTGACGACATGGTTCTACAACCATATTCTGTAAGGACAGGACAAA	TACGGTAGCAGAGACTTGGTCTGATCACAGTGGCAATGGAACCTT	196	36	ACCATATTCTGTAAGGACAGGACAAATTTTCCTCCTATGAGAGAGTGGAAAAAAAAAATTCCAGTAACCATAAGATAATAATATTACCTTTATTTCTGCTTAGTGACAGTGCAATTTCAGAATTGTTATTCAAAGGACGGCGTTTTCCTTTCCCTACAAGCTCTGTATTTACAAAGGTTCCATTGCCACTGTGATC
CHEK2	CHEK2_20	chr22	29120969	29121145	ACACTGACGACATGGTTCTACAATTTCTGCTTAGTGACAGTGCAA	TACGGTAGCAGAGACTTGGTCTTCAAAGTCTGAAACAAAATGTTCTCTAT	177	37	ATTTCTGCTTAGTGACAGTGCAATTTCAGAATTGTTATTCAAAGGACGGCGTTTTCCTTTCCCTACAAGCTCTGTATTTACAAAGGTTCCATTGCCACTGTGATCTTCTATGTATGCAATGTAAGAGTTTTTAGGACCCACTTCCTAAAATAGAGAACATTTTGTTTCAGACTTTGA
CHEK2	CHEK2_21	chr22	29121130	29121325	ACACTGACGACATGGTTCTACATTGTTTCAGACTTTGAATAGCAGAG	TACGGTAGCAGAGACTTGGTCTGGGACAAAAGCTGTGAATATTGCT	196	36	TTGTTTCAGACTTTGAATAGCAGAGATTTATAGTGGGAAAATATCTAAAAACAATGACCAAATTACCAGCTCTCCTAGATACATGGGTATTCATTACCTACCCTGAAAATCCGAAAGTGTTTCTTGCTGTATGTTCGGTATTTATCTGTTCTTTTCAGCAGTGGTTCATCAAAGCAATATTCACAGCTTTTGTCCC
CHEK2	CHEK2_22	chr22	29121245	29121443	ACACTGACGACATGGTTCTACAAGTGTTTCTTGCTGTATGTTCGG	TACGGTAGCAGAGACTTGGTCTTTTTCCTACAATTAGCATTTATGAGCA	199	35	AGTGTTTCTTGCTGTATGTTCGGTATTTATCTGTTCTTTTCAGCAGTGGTTCATCAAAGCAATATTCACAGCTTTTGTCCCTCCCAAACCAGTAGTTGTCATTCACACATTCTGTAATATAAAAGCATGCATCAGAGGGCTGTTGAATTTCATGTATCAAACGTTTAAAAATTGCTCATAAATGCTAATTGTAGGAAAA
CHEK2	CHEK2_23	chr22	29126382	29126575	ACACTGACGACATGGTTCTACAGGAAAGACCCACAGCTAACATCA	TACGGTAGCAGAGACTTGGTCTCCGTGGCTGGCCTAACTTTTTT	194	48	ggaaagaCCCACAGCTAACATCATACTTAGACTGCAAACTggccggggatggtgcctcacacctcttatcccagcactttgggaggctgaggcaggaggatcagatgacagcaggagttcaagatcagattgggtaacatggccagactctgtctctacaaaaaataaaaatAAAAAAGTTAggccagccacgg	Two primers sits in the repeat region
CHEK2	CHEK2_24	chr22	29130301	29130491	ACACTGACGACATGGTTCTACAAACTCCAATCAGAACCTTCCACC	TACGGTAGCAGAGACTTGGTCTTATTCCTGAGGACCAAGAACCTG	191	47	aactccaatcagaaccttccacctggtaataCAACTTTCTGTAAGTGTTTTTCTGAACAAAACGTGATACTATACAACAAAGGGTCTTACCAAGATTGGCAAATCCATCCTGAAGGGCCCATAATCGAGCCCAGGGGGCAGGGGTAGGCtcctcaggttcttggtcctcaggttcttggtcctcaggAATA	Two primers sits in the repeat region
CHEK2	CHEK2_25	chr22	29130405	29130587	ACACTGACGACATGGTTCTACACCATCCTGAAGGGCCCATAATC	TACGGTAGCAGAGACTTGGTCTCTCTACCAGCACGATGCCAAA	183	56	CCATCCTGAAGGGCCCATAATCGAGCCCAGGGGGCAGGGGTAGGCtcctcaggttcttggtcctcaggttcttggtcctcaggAATAGAATAGAGTTCCTGAGTGGACACTGTCTCTAAGGAGCTCAGTGTCCCAGAGCTGGAGTGAGAGGACTGGCTGGAGTTTGGCATCGTGCTGGTAGAG
CHEK2	CHEK2_26	chr22	29130506	29130690	ACACTGACGACATGGTTCTACAAGTGGACACTGTCTCTAAGGAGC	TACGGTAGCAGAGACTTGGTCTTTGAGGCTCAGCAGTCTCATGG	185	58	AGTGGACACTGTCTCTAAGGAGCTCAGTGTCCCAGAGCTGGAGTGAGAGGACTGGCTGGAGTTTGGCATCGTGCTGGTAGAGGAGCTGGATATGCCCTGGGACTGTGAGGAGGAGCCTTGGGACTGGGTAACGCTGCCATGGGGCTGTGAACAGGCACTGCTGCCATGAGACTGCTGAGCCTCAA
CHEK2	CHEK2_27	chr22	29130567	29130749	ACACTGACGACATGGTTCTACATTTGGCATCGTGCTGGTAGAG	TACGGTAGCAGAGACTTGGTCTACTCACCTTTGTTGTTGGACACT	183	55	TTTGGCATCGTGCTGGTAGAGGAGCTGGATATGCCCTGGGACTGTGAGGAGGAGCCTTGGGACTGGGTAACGCTGCCATGGGGCTGTGAACAGGCACTGCTGCCATGAGACTGCTGAGCCTCAACATCCGACTCCCGAGACATCACGACCTCAAAAAGAAAGTGTCCAACAACAAAGGTGAGT
EPCAM	EPCAM_1	chr2	47596563	47596751	ACACTGACGACATGGTTCTACACTCCTCGTGTCCCACTCCC	TACGGTAGCAGAGACTTGGTCTCTCCACAACTCTGCTCCAATCC	189	73	ctcctcgtgtcccactcccggcgcacgccctcccgcgagtcccgggcccctcccgcgccccTCTTCTCGGCGCGCGCGCAGCATGGCGCCCCCGCAGGTCCTCGCGTTCGGGCTTCTGCTTGCCGCGGCGACGGCGACTTTTGCCGCAGCTCAGGAAGGTGAGGCGCGGATTGGAGCAGAGTTGTGGAG	One primer sits in the repeat region
EPCAM	EPCAM_2	chr2	47600535	47600733	ACACTGACGACATGGTTCTACAAACTTAGCTGGGACATGAGAGTT	TACGGTAGCAGAGACTTGGTCTAGGTAATTAGGATATTTTACTCACGCTTT	199	34	AACTTAGCTGGGACATGAGAGTTAATAGATCCACATTTTAAAGTAGATTTTTTTTTTAATTTTCTAGAATGTGTCTGTGAAAACTACAAGCTGGCCGTAAACTGCTTTGTGAATAATAATCGTCAATGCCAGTGTACTTCAGTTGGTGCACAAAATACTGTCATTTGCTCAAAGCGTGAGTAAAATATCCTAATTACCT
EPCAM	EPCAM_3	chr2	47600615	47600792	ACACTGACGACATGGTTCTACAAAACTACAAGCTGGCCGTAAACT	TACGGTAGCAGAGACTTGGTCTAACTCTTTCCAACTCAAGGCACA	178	35	AAACTACAAGCTGGCCGTAAACTGCTTTGTGAATAATAATCGTCAATGCCAGTGTACTTCAGTTGGTGCACAAAATACTGTCATTTGCTCAAAGCGTGAGTAAAATATCCTAATTACCTGTAAGCTTTATTTTGACTTAATACTTCTTTAATTGATGTGCCTTGAGTTGGAAAGAGTT
EPCAM	EPCAM_4	chr2	47600886	47601059	ACACTGACGACATGGTTCTACATTTTTTCCCGTAATCATGAAATCAGT	TACGGTAGCAGAGACTTGGTCTGCAGTCAGGATCATAAAGCCCAT	174	41	TTTTTTCCCGTAATCATGAAATCAGTTATTTTTCAGTTTGGCATTAAGGTTTCTTTTTCAGTGGCTGCCAAATGTTTGGTGATGAAGGCAGAAATGAATGGCTCAAAACTTGGGAGAAGAGCAAAACCTGAAGGGGCCCTCCAGAACAATGATGGGCTTTATGATCCTGACTGC
EPCAM	EPCAM_5	chr2	47600984	47601178	ACACTGACGACATGGTTCTACATGGCTCAAAACTTGGGAGAAGAG	TACGGTAGCAGAGACTTGGTCTACTCGCTCAGAGCAGGTTATTTC	195	52	TGGCTCAAAACTTGGGAGAAGAGCAAAACCTGAAGGGGCCCTCCAGAACAATGATGGGCTTTATGATCCTGACTGCGATGAGAGCGGGCTCTTTAAGGCCAAGCAGTGCAACGGCACCTCCATGTGCTGGTGTGTGAACACTGCTGGGGTCAGAAGAACAGACAAGGACACTGAAATAACCTGCTCTGAGCGAGT
EPCAM	EPCAM_6	chr2	47601037	47601214	ACACTGACGACATGGTTCTACAATGGGCTTTATGATCCTGACTGC	TACGGTAGCAGAGACTTGGTCTACAAGTAGTATAGGCAGCCCCAC	178	52	ATGGGCTTTATGATCCTGACTGCGATGAGAGCGGGCTCTTTAAGGCCAAGCAGTGCAACGGCACCTCCATGTGCTGGTGTGTGAACACTGCTGGGGTCAGAAGAACAGACAAGGACACTGAAATAACCTGCTCTGAGCGAGTGAGAACCTAGTGAGTGGGGCTGCCTATACTACTTGT
EPCAM	EPCAM_7	chr2	47602312	47602491	ACACTGACGACATGGTTCTACATTAGGAAAATAGTATGGAAGACTGAGTTA	TACGGTAGCAGAGACTTGGTCTGAAGATTTGAGCCACCAACTGTG	180	34	TTAGGAAAATAGTATGGAAGACTGAGTTATAGTCAACTGACATTGTCTTTTTACTTTATAGCTGGATCATCATTGAACTAAAACACAAAGCAAGAGAAAAACCTTATGATAGTAAAAGTTTGCGGACGTAAGTGCAATTAAATGCATCATATTCTTGCACAGTTGGTGGCTCAAATCTTC
EPCAM	EPCAM_8	chr2	47604089	47604266	ACACTGACGACATGGTTCTACAAGTGCTTCTTACTGTTGTGTGGT	TACGGTAGCAGAGACTTGGTCTATACTGTCTCACCAACTGTCTGC	178	33	AGTGCTTCTTACTGTTGTGTGGTACAAACATTTTTTTTTAATACAGATTTTAAATTCTTTACAGTGCACTTCAGAAGGAGATCACAACGCGTTATCAACTGGATCCAAAATTTATCACGAGTATTTTGGTATGATTTTTTAATAAGTGAGCTTTAGCAGACAGTTGGTGAGACAGTAT
EPCAM	EPCAM_10	chr2	47605978	47606170	ACACTGACGACATGGTTCTACAGCATGTAGATTATAGAAAATCAAACACTGAA	TACGGTAGCAGAGACTTGGTCTCATCAGCTATGTCCACATCATTCT	193	26	GCATGTAGATTATAGAAAATCAAACACTGAATATTCTGATTCTCAATTAATGTTATTTTCAAATGATTTTGATTATATTAGTATTAATTTGTATTATTCAATTTTTTTCCCCAGTATGAGAATAATGTTATCACTATTGATCTGGTTCAAAATTCTTCTCAAAAAACTCAGAATGATGTGGACATAGCTGATG	Assays designed by relax mode and have no off-target hits
EPCAM	EPCAM_17	chr2	47606081	47606243	ACACTGACGACATGGTTCTACATTTTTCCCCAGTATGAGAATAATGT	TACGGTAGCAGAGACTTGGTCTGCATGATAGACTACATTCCTGAACA	163	33	TTTTTCCCCAGTATGAGAATAATGTTATCACTATTGATCTGGTTCAAAATTCTTCTCAAAAAACTCAGAATGATGTGGACATAGCTGATGTGGCTTATTATTTTGAAAAAGATGTGAGTATCATCTTCTTTATTCCTGTGTTCAGGAATGTAGTCTATCATGC
EPCAM	EPCAM_13	chr2	47606853	47607048	ACACTGACGACATGGTTCTACAGGCCATGGTTGGTTTCCTTAAAT	TACGGTAGCAGAGACTTGGTCTagcTTTTAGACCCTGCATTGAGA	196	36	GGCCATGGTTGGTTTCCTTAAATATTTTTAATTCCTTTTCTCCTTTTCAATACAGGTTAAAGGTGAATCCTTGTTTCATTCTAAGAAAATGGACCTGACAGTAAATGGGGAACAACTGGATCTGGATCCTGGTCAAACTTTAATTTATTATGTTGATGAAAAAGCACCTGAATTCTCAATGCAGGGTCTAAAAgct	One primer sits in the repeat region
EPCAM	EPCAM_14	chr2	47607002	47607179	ACACTGACGACATGGTTCTACAATGTTGATGAAAAAGCACCTGAAT	TACGGTAGCAGAGACTTGGTCTGCGCCCAGCCACTATTACTT	178	38	ATGTTGATGAAAAAGCACCTGAATTCTCAATGCAGGGTCTAAAAgctggtgttattgctgttattgtggttgtggtgatagcagttgttgctggaattgttgtGCTGGTGAGTACAGAACAAGTAAAATTTCATTTAAGGGTATATTTTTTCAAGAAAAAGTAATAGTggctgggcgc	One primer sits in the repeat region
EPCAM	EPCAM_15	chr2	47612205	47612388	ACACTGACGACATGGTTCTACATTCAGATCAAAATTATGTCCATTAAAAGC	TACGGTAGCAGAGACTTGGTCTTCAACAGGGCCTTTCTATTTAGGT	184	33	TTCAGATCAAAATTATGTCCATTAAAAGCATATATGTCTGTTTAGATAATCTTTTTTTGAATAGCAGTCCTAAAACAATAGTTGTCTTTCTTCCACTCAGGTTATTTCCAGAAAGAAGAGAATGGCAAAGTATGAGAAGGCTGAGGTAAATGGATTACTTACCTAAATAGAAAGGCCCTGTTGA	Assays designed by relax mode and have no off-target hits
EPCAM	EPCAM_16	chr2	47613641	47613839	ACACTGACGACATGGTTCTACAACTATTTTCAGAATGAACAAAAGATTGAAAA	TACGGTAGCAGAGACTTGGTCTTCAAAGATGTCTTCGTCCCAC	199	32	ACTATTTTCAGAATGAACAAAAGATTGAAAAATTATTTAGAATTTTTTTCTGTGCTTTTTCCTGTTTCAGATAAAGGAGATGGGTGAGATGCATAGGGAACTCAATGCATAACTATATAATTTGAAGATTATAGAAGAAGGGAAATAGCAAATGGACACAAATTACAAATGTGTGTGCGTGGGACGAAGACATCTTTGA
FAM175A	FAM175A_1	chr4	84383565	84383759	ACACTGACGACATGGTTCTACAAATGTTTGGCTTTACCCATCAGC	TACGGTAGCAGAGACTTGGTCTACACAAGACAAACGATCTAAAGCA	195	36	AATGTTTGGCTTTACCCATCAGCCAAATAAAAAAATCTCCTTGTAAGGTTAAAAGGATCAAAATGTAGGAGACCGTGAATATTCACCAAAACCCTTCATCTTTTCAATTTCTTCATCTGTTTCTGGGCTGCTCATTTTGGATGCTTTATCTTGGTTACTACTACCAGTATCTGCTTTAGATCGTTTGTCTTGTGT
FAM175A	FAM175A_2	chr4	84383679	84383875	ACACTGACGACATGGTTCTACAATCTGTTTCTGGGCTGCTCATTT	TACGGTAGCAGAGACTTGGTCTTGGTAGAACACACTGACATTCCT	197	40	ATCTGTTTCTGGGCTGCTCATTTTGGATGCTTTATCTTGGTTACTACTACCAGTATCTGCTTTAGATCGTTTGTCTTGTGTATCTAACAACCGAGATCTCTTGAATTGCCATCTGTCATCTAAGTCTAAGGCTTTATGCTTAATGATTTGTGGTGTACTAGCTGGACTAGCTTCAGGAATGTCAGTGTGTTCTACCA
FAM175A	FAM175A_3	chr4	84383736	84383925	ACACTGACGACATGGTTCTACATGCTTTAGATCGTTTGTCTTGTG	TACGGTAGCAGAGACTTGGTCTTAGCTGTAACTACAACCACCATC	190	40	TGCTTTAGATCGTTTGTCTTGTGTATCTAACAACCGAGATCTCTTGAATTGCCATCTGTCATCTAAGTCTAAGGCTTTATGCTTAATGATTTGTGGTGTACTAGCTGGACTAGCTTCAGGAATGTCAGTGTGTTCTACCATTAAGGTCAGATTGTCTACTACATCGAGATGGTGGTTGTAGTTACAGCTA
FAM175A	FAM175A_4	chr4	84383838	84384012	ACACTGACGACATGGTTCTACAAGCTGGACTAGCTTCAGGAATGT	TACGGTAGCAGAGACTTGGTCTTTGTCAGGCATTACGGACCTTTT	175	37	AGCTGGACTAGCTTCAGGAATGTCAGTGTGTTCTACCATTAAGGTCAGATTGTCTACTACATCGAGATGGTGGTTGTAGTTACAGCTACTTTTAGAAACATGTCTATTTTTTAAAGACATAACACATGAATGAAGAAATTCAGAATTTGGAAAAAAGGTCCGTAATGCCTGACAA
FAM175A	FAM175A_5	chr4	84383893	84384091	ACACTGACGACATGGTTCTACAACTACATCGAGATGGTGGTTGT	TACGGTAGCAGAGACTTGGTCTATGTTATATGTTGAACTGTTATTCTATTTTGTTT	199	33	ACTACATCGAGATGGTGGTTGTAGTTACAGCTACTTTTAGAAACATGTCTATTTTTTAAAGACATAACACATGAATGAAGAAATTCAGAATTTGGAAAAAAGGTCCGTAATGCCTGACAAAGAAAAATGTTCTCCTGAGGGTCTTTTTGGATGTTCTTCTCTCCTAAACAAAATAGAATAACAGTTCAACATATAACAT
FAM175A	FAM175A_6	chr4	84384614	84384807	ACACTGACGACATGGTTCTACAAGCACAGAAAGTAGAGATGTGTTG	TACGGTAGCAGAGACTTGGTCTACAGCTTGAAATATTACCTATGCCCTT	194	35	AGCACAGAAAGTAGAGATGTGTTGTTTACTTACTTGCTGCCTGAATCTGTGCTCCTCTCCTTTTCTCAATTTCTCGTTTTAATCTGTTTACATCCTTTACTAGTTTATCTACTGCTTGTTCACTGTCTTCCACTTTTTTGCATATACTCTGCAAAATAAAGTAATTTAAGGGCATAGGTAATATTTCAAGCTGT
FAM175A	FAM175A_7	chr4	84388566	84388736	ACACTGACGACATGGTTCTACATCTATCTAGAAGTGGTTGACGTGT	TACGGTAGCAGAGACTTGGTCTAAATGGTTTTGTGTATTTGCCTGA	171	31	TCTATCTAGAAGTGGTTGACGTGTTTGATATGTTAACTTACCTTTAATTCCTCTTGTAATGAAGCATACATTTCATTTATCTTATGTACCTCCTTTAAGGATCCATCTTCTTCAAAAAATTTAGAGCTGTAAAAAATTACCATTTCCTCAGGCAAATACACAAAACCATTT
FAM175A	FAM175A_8	chr4	84390092	84390267	ACACTGACGACATGGTTCTACATCCCTTGAATTTTTATTCTGCTGTTGT	TACGGTAGCAGAGACTTGGTCTGGCATGTCTGAACAACTGGGTTA	176	36	TCCCTTGAATTTTTATTCTGCTGTTGTTTGAGAAATAAGAAAATTAATTTCAAAGATGAATAGAAGTTTTGTGAGAAAGCAGTTGAATCTTACCTGTGTGTTTGTACTGCTCGGCTAAAACCAGTGGACATACAGGAACCTGATACAGTTTTATAACCCAGTTGTTCAGACATGCC
FAM175A	FAM175A_9	chr4	84390193	84390387	ACACTGACGACATGGTTCTACATTGTACTGCTCGGCTAAAACCAG	TACGGTAGCAGAGACTTGGTCTGGGGACAAGTAATCTATTCCAGCA	195	38	TTGTACTGCTCGGCTAAAACCAGTGGACATACAGGAACCTGATACAGTTTTATAACCCAGTTGTTCAGACATGCCCAGATTGGCAACCACTAAAGGTACCCTGTGAAAAAGTCTGACAAAATAAAACTTTAGAGTATAAACTTAGAATGAAAAGAAAGATTAGTATCTACCTGCTGGAATAGATTACTTGTCCCC
FAM175A	FAM175A_10	chr4	84391255	84391452	ACACTGACGACATGGTTCTACATGCGACAATATATGAGAACACTTTG	TACGGTAGCAGAGACTTGGTCTACCAAGACCTTGTTTTTCTGCTAT	198	34	tgcgacaatatatgagaacactttgtaagctgcaaaaagtactaAGTATTAGATATATTTTTCTATTAGTTTAATACAGCCAGTGACTGGCCAACATTTACCCTTTTTGAGGTTTATATAAGGAATGTTCCAGTCGATGAGTAGAGCAGCTTTCTGTTATTATACTTGGTGTTAATAGCAGAAAAACAAGGTCTTGGT	One primer sits in the repeat region
FAM175A	FAM175A_11	chr4	84391381	84391561	ACACTGACGACATGGTTCTACAGTTCCAGTCGATGAGTAGAGCAG	TACGGTAGCAGAGACTTGGTCTTCTGTATTTCAGAATGTGGTAGGTT	181	40	GTTCCAGTCGATGAGTAGAGCAGCTTTCTGTTATTATACTTGGTGTTAATAGCAGAAAAACAAGGTCTTGGTTTGAAAAATGCTCCTGCAAGTTTTTGTGAAGCAGCCTCTCTCTAAACGTCATGATCTGATCTGAATGACGACGGAATTTGTACCAACCTACCACATTCTGAAATACAGA
FAM175A	FAM175A_12	chr4	84391461	84391648	ACACTGACGACATGGTTCTACATGCTCCTGCAAGTTTTTGTGAAG	TACGGTAGCAGAGACTTGGTCTAAGAAAGCCATTTTAAGGTTGTTTATTTTA	188	32	TGCTCCTGCAAGTTTTTGTGAAGCAGCCTCTCTCTAAACGTCATGATCTGATCTGAATGACGACGGAATTTGTACCAACCTACCACATTCTGAAATACAGAATAAAAAGGATATACATCTTAATAGTTACAATGATATGTCTTACtattataattaaataaaataaaCAACCTTAAAATGGCTTTCTT	One primer sits in the repeat region
FAM175A	FAM175A_13	chr4	84393273	84393464	ACACTGACGACATGGTTCTACATGTCAAACACTGCTTAAAAATTCTGTC	TACGGTAGCAGAGACTTGGTCTACCTTTAATTTTGGCTTTTACAGCTT	192	29	TGTCAAACACTGCTTAAAAATTCTGTCAAAGTACTGTGTGTTTTTAAGAACCAAAAACAATGCAAATAATACCAAAAAAAGGGAAGATAAATTAGAGAATACCTTTTTGACATTTGATAATATTTTCTTCAGTGCTTGCTCATTTACTTCGCCTGAAGAATTATAAAAGCTGTAAAAGCCAAAATTAAAGGT
FAM175A	FAM175A_14	chr4	84393398	84393576	ACACTGACGACATGGTTCTACATCTTCAGTGCTTGCTCATTTACT	TACGGTAGCAGAGACTTGGTCTTTAGGACTTCATCTGACAGGCAA	179	30	TCTTCAGTGCTTGCTCATTTACTTCGCCTGAAGAATTATAAAAGCTGTAAAAGCCAAAATTAAAGGTATTTCAAATACGCtaaaaatataagtaattttattagtattttaaattttaGTTATTCCTAACCCAACTACCAAAGCCCATATACCTATTTGCCTGTCAGATGAAGTCCTAA
FAM175A	FAM175A_15	chr4	84397738	84397904	ACACTGACGACATGGTTCTACATCACTTGCAGAGAGTAATTTTCACA	TACGGTAGCAGAGACTTGGTCTgctcaataTGCAGCATTCAGGTG	167	32	TCACTTGCAGAGAGTAATTTTCACAATGGATCATTTACTTACTAGCACTACTACTTACCTAAAAAGCTGATAGCATGGAATATATTTCTGAATGTCTGGAAGAAAAGGATTTTTAGTTATGATTACATTAATTCAATTCAGAATCACCTGAATGCTGCAtattgagc	One primer sits in the repeat region
FAM175A	FAM175A_16	chr4	84403223	84403399	ACACTGACGACATGGTTCTACAtaatttaCGCTGACCCCTTTCAG	TACGGTAGCAGAGACTTGGTCTAGGAAGGTTTTCTTCTTGGGGAA	177	35	taatttaCGCTGACCCCTTTCAGCATAAACTATCAAATATAGGAGACACAGATGATTCAAATATAGGAGAAATAAATAACTCACCAATTGTATAAACAACTTCAACATCATCCATTTGGGAATCAGTAATGCTGTTCTTGGCTTCACCTTTTACTTCCCCAAGAAGAAAACCTTCCT	One primer sits in the repeat region
FAM175A	FAM175A_17	chr4	84403340	84403525	ACACTGACGACATGGTTCTACAGGGAATCAGTAATGCTGTTCTTGG	TACGGTAGCAGAGACTTGGTCTATCTTTCATATGTGCCCCCGACT	186	37	GGGAATCAGTAATGCTGTTCTTGGCTTCACCTTTTACTTCCCCAAGAAGAAAACCTTCCTATGAAGATAAAGAGGCAATATATAGAATACACTGATAGAATTACTGTTCACTTAACTAACCGTATTTCCTGAGTATTTTACTATGTATACAATATGTGCTACCAGTCGGGGGCACATATGAAAGAT
FAM175A	FAM175A_18	chr4	84406061	84406259	ACACTGACGACATGGTTCTACAGGAGCAACAGCGGGGAG	TACGGTAGCAGAGACTTGGTCTCTCGTCCTCTTGTGTAGCCTGA	199	70	GGAGCAACAGCGGGGAGGCAGGCCGCGCGCAGGGCTCTTCCCAGGCGACGCCGGACCCCGCCCCGTCCCTCGGCTCACCGTGTCCGAGTCCGTGTTGAGGTGCTGGAAAGCGAGTGCGCCGAGCACAAAGCCCGAGAGCACCGCCGACGTACTCTCCCCCTCCATGCTACCGCCGCCTCAGGCTACACAAGAGGACGAG
FANCC	FANCC_1	chr9	97863917	97864106	ACACTGACGACATGGTTCTACAGGTCATCACCTGTCCTGTGG	TACGGTAGCAGAGACTTGGTCTCGAGATCATTGGCTTTCTTGACC	190	56	GGTCATCACCTGTCCTGTGGCCCTGGCGAGCCTGATCCCTCACGCCGGGCACCCACACGGCCTGCGTGCCTTCTAGACTTGAGTTCGCAGCTCTTTAAGGAGCTCTCGGGCCAGTTTTTCTGATCTAGGGCTTTCAATGCCAAGACGATTCCATCTGTACAAGGTCTGGTCAAGAAAGCCAATGATCTCG
FANCC	FANCC_2	chr9	97863981	97864160	ACACTGACGACATGGTTCTACACGTGCCTTCTAGACTTGAGTTCG	TACGGTAGCAGAGACTTGGTCTTTTGCCTTCTCTTCTGTCCTGAT	180	48	CGTGCCTTCTAGACTTGAGTTCGCAGCTCTTTAAGGAGCTCTCGGGCCAGTTTTTCTGATCTAGGGCTTTCAATGCCAAGACGATTCCATCTGTACAAGGTCTGGTCAAGAAAGCCAATGATCTCGTGAGTTATCTCAGCAGTGTGAGCCATCTGCAATCAGGACAGAAGAGAAGGCAAA
FANCC	FANCC_3	chr9	97869296	97869480	ACACTGACGACATGGTTCTACACTCGCCTGGAGCAGAAATGAG	TACGGTAGCAGAGACTTGGTCTGCAGACGGTAGCAGGACAG	185	58	CTCGCCTGGAGCAGAAATGAGTACTAGGATGCTGGACCACAGGGAGACTTACCAGGGTGATGACATCCCAGGCGATCGTGTGGCCTCCAGGAGCCCAGAGCAGGAAGTTGAGGAGAAGGTGCCTGATCAGCTGTTGTGCAGGAGCTCTGAGGTCTGTGTCTGTGCCCTGTCCTGCTACCGTCTGC
FANCC	FANCC_4	chr9	97869400	97869586	ACACTGACGACATGGTTCTACAAAGTTGAGGAGAAGGTGCCTGAT	TACGGTAGCAGAGACTTGGTCTTCCTAACCTCTCCCCTGTGAAAT	187	58	AAGTTGAGGAGAAGGTGCCTGATCAGCTGTTGTGCAGGAGCTCTGAGGTCTGTGTCTGTGCCCTGTCCTGCTACCGTCTGCAGGTCCTGGGCTGAGAGGCTGCTGCTTCTGGACATTGCCAGGAGGTGGCCCAGCACGGCCTTCACCTGGACCTGGGCAATAGTATTTCACAGGGGAGAGGTTAGGA
FANCC	FANCC_5	chr9	97873419	97873607	ACACTGACGACATGGTTCTACACAGGGCACGCCTTGGA	TACGGTAGCAGAGACTTGGTCTCTGCAGGCATGGTGATCT	189	59	CAGGGCACGCCTTGGAGGACGCGACCCTGGGGCAGATATGGCAGCTGAGCAATAACAGATCAAATGACCTTGGGGAAGAAGGGTCTTCGTTTTGCAGGAGAATGGGCTGGCAGCGTCTCGTCTCTGGCCACCTCGGTGGGGACAGGAGAACGCCTCTGACCACAAGGCTGGAGATCACCATGCCTGCAG
FANCC	FANCC_6	chr9	97873478	97873661	ACACTGACGACATGGTTCTACATCAAATGACCTTGGGGAAGAAGG	TACGGTAGCAGAGACTTGGTCTCTTGGCTTCCATGACACCTGA	184	57	TCAAATGACCTTGGGGAAGAAGGGTCTTCGTTTTGCAGGAGAATGGGCTGGCAGCGTCTCGTCTCTGGCCACCTCGGTGGGGACAGGAGAACGCCTCTGACCACAAGGCTGGAGATCACCATGCCTGCAGGTTGCCATGACATATGCCATCTGTGGGCAGAGCTCAGGTGTCATGGAAGCCAAG
FANCC	FANCC_7	chr9	97873680	97873862	ACACTGACGACATGGTTCTACATCTGCAAGCTCCTCTCAGC	TACGGTAGCAGAGACTTGGTCTTGAGATGGTGGCAGAGCAATTA	183	62	TCTGCAAGCTCCTCTCAGCCCCCCAGAGCCCACCCCAAACACATGCAGTGGGGCCTGCTACCCACCATAGTCTGTGCTCTCTGCTGCCTCCCATCACGGGGGCCGTAGTAGAAGGCCAAGAGCCACAGCAGGGCCGTGGGGGGTTCGGCTGCCGACATCAGTAATTGCTCTGCCACCATCTCA
FANCC	FANCC_8	chr9	97873781	97873954	ACACTGACGACATGGTTCTACAGCCGTAGTAGAAGGCCAAGAG	TACGGTAGCAGAGACTTGGTCTGTTGTCAACTGCCATGTGTTCTG	174	58	GCCGTAGTAGAAGGCCAAGAGCCACAGCAGGGCCGTGGGGGGTTCGGCTGCCGACATCAGTAATTGCTCTGCCACCATCTCAGCCCATCCTCCGAAGTGAATGAACAGGAACCAGCTCTCAAAGGGACCTCCGCAGGACCTGGAACAGAGGCAGAACACATGGCAGTTGACAAC
FANCC	FANCC_9	chr9	97876855	97877045	ACACTGACGACATGGTTCTACAAGGATCTAGGGAAACCATGTGTG	TACGGTAGCAGAGACTTGGTCTATGGGCTTGACATTTCCTCAGTT	191	50	AGGATCTAGGGAAACCATGTGTGAAGTAGATTTGGGAGTGGTCAGTGTTTGCTCACCCATGAGTCTGGTCTTCAACTGCTTCTCTGAGCAGTTCAGAAATATGCTTCAGTGTCTGGAGCCAGTGTCCCCGAGGGATATCTGCGGGTGGAGAGAGATACGTCAGAGGGCAACTGAGGAAATGTCAAGCCCAT
FANCC	FANCC_10	chr9	97879516	97879701	ACACTGACGACATGGTTCTACAggGCCTGATGAGGAGGTCATA	TACGGTAGCAGAGACTTGGTCTTGCTCTTTGGATTTTCCATCCTG	186	49	ggGCCTGATGAGGAGGTCATAATTTGACAATGCTCTTCCCAGGAAATCATTCTGATGTGGGCAAAGTCAACCCTAACTCACCTTGAGGGTCTTGCAGCAGCACCATGGCAAGAGATGGAGAAGTGTAAGGAAAGTAGGTCTTGAGTGCAAACCGCAGCTGCCACAGGATGGAAAATCCAAAGAGCA	One primer sits in the repeat region
FANCC	FANCC_11	chr9	97887314	97887499	ACACTGACGACATGGTTCTACATCAACAGCGTCTTATTCTCTGGG	TACGGTAGCAGAGACTTGGTCTAACGTGTTCTGATCTGACTTTGC	186	44	TCAACAGCGTCTTATTCTCTGGGATGAATGAGTAATATATGTGATATAACAAACCTGCTTGCTTGCTTTCTCCAGAGCTTCTACAAAGCACTGCGTAAACACCTGAATAGTGGCTATGATTTCCAGGGCCCCATCGGTTTCCAGGAGTGCACACCTGAACAATGCAAAGTCAGATCAGAACACGTT
FANCC	FANCC_12	chr9	97888749	97888942	ACACTGACGACATGGTTCTACATTCATGCTTGGAAATGGAACCTT	TACGGTAGCAGAGACTTGGTCTACTCCTTTGGCTGATAATAGCAAGT	194	41	TTCATGCTTGGAAATGGAACCTTTTTTACATCAATTACTAGAAGAAACAGTGTAACGTTTACCTGAACATCTCATCAACAACCCGGAATATGGCAGGGTGGCAGGCTGCTTGAGGCTGTAAAAGGAGAAGACCATGAGAATGTGAAATATCACAAGCACTTTCTCAGAAACTTGCTATTATCAGCCAAAGGAGT
FANCC	FANCC_13	chr9	97897602	97897782	ACACTGACGACATGGTTCTACATCCCTTCATCAAAACCCAGTACG	TACGGTAGCAGAGACTTGGTCTAGAAGATTTCTCTCCCCATGTCAG	181	44	TCCCTTCATCAAAACCCAGTACGTACCAGCGATGAATCTTTTATAAAGCATTCGATCCTTCTCAGACAATTTCTCTCACTGGAGATTAGCTTTTCAAAAAGATGCAGCATTGCTTTTTCAAGGCTGGGAAGGTGCCGAAGCCAGAGGCAGACTACAGCTGACATGGGGAGAGAAATCTTCT
FANCC	FANCC_14	chr9	97897713	97897908	ACACTGACGACATGGTTCTACAGCTTTTTCAAGGCTGGGAAGGT	TACGGTAGCAGAGACTTGGTCTCACTGCTGTGACCATGATGAGAA	196	39	GCTTTTTCAAGGCTGGGAAGGTGCCGAAGCCAGAGGCAGACTACAGCTGACATGGGGAGAGAAATCTTCTTCCTTTCAGAAAGAAATAAACAAAATTTTAAACAGAAATGGCTCACTGAAAAAAGAAGATTAAAAAAAGTTCAAAATGCAATCACTAATCCAATTTGTGAGACTTCTCATCATGGTCACAGCAGTG
FANCC	FANCC_15	chr9	97912144	97912332	ACACTGACGACATGGTTCTACAACCACAGCCTTCTAAGAAAAGGAA	TACGGTAGCAGAGACTTGGTCTTGTGTCCCACTTATTACCCTGAC	189	49	ACCACAGCCTTCTAAGAAAAGGAAAAACGACGCAGGATGACAGGAAACATTTGCCACTTACAGCAAAATGGCCTCGTTTACAGCCTCAAAGAACTCTGGCTGGAGGATTTCCTGAGGTTCACGTCCATGACAGATGAGGAGAGCCTCCACCAGGGGGTCAACATCTGTCAGGGTAATAAGTGGGACACA
FANCC	FANCC_16	chr9	97912230	97912415	ACACTGACGACATGGTTCTACACAAAGAACTCTGGCTGGAGGATT	TACGGTAGCAGAGACTTGGTCTTGCATGGCTCTTAGATTTGAGTGA	186	49	CAAAGAACTCTGGCTGGAGGATTTCCTGAGGTTCACGTCCATGACAGATGAGGAGAGCCTCCACCAGGGGGTCAACATCTGTCAGGGTAATAAGTGGGACACAAACTCGTGACAGGGACGCCACTCGCTCGGGAGCCATTCTATGGAAGAAATAAGAAATAATCACTCAAATCTAAGAGCCATGCA
FANCC	FANCC_17	chr9	97933296	97933474	ACACTGACGACATGGTTCTACATCCTCTCATAACCAAACTGATACATT	TACGGTAGCAGAGACTTGGTCTTAATCCTGTTTGCAGCGTGAGT	179	37	TCCTCTCATAACCAAACTGATACATTTTGAAACCTGAGAAGAAGGATGTTTAGTTTAACACCTACCGCCTTTGAGTGTTAAATCCATTAAGATGATTCTCTCTGAGTTCAGACGCTAATGATAAAACCATCTGTAAAACAAAATCAGTTGCAGGTTAACTCACGCTGCAAACAGGATTA
FANCC	FANCC_18	chr9	97934265	97934457	ACACTGACGACATGGTTCTACATGATGGCACATTCAGCATTAAAC	TACGGTAGCAGAGACTTGGTCTGTTAACTTTTTCTGTTTATGTTTTTTAGGGT	193	31	TGATGGCACATTCAGCATTAAACATTTCAAAAGTGATAAATTTTAAATACTCACATTTTTAAGCAAACCAGGATAGTAATCTATAGGTGCATACCCAAGACCTTGAGTGAAAAGAGCAACTTCTTTATCAAATCTGAGTGCTGAAAGTATATGAGATAATACACCCTAAAAAACATAAACAGAAAAAGTTAAC
FANCC	FANCC_19	chr9	97934332	97934530	ACACTGACGACATGGTTCTACACCAGGATAGTAATCTATAGGTGCATAC	TACGGTAGCAGAGACTTGGTCTTAGAGACCACCCCCATGTACAAA	199	34	CCAGGATAGTAATCTATAGGTGCATACCCAAGACCTTGAGTGAAAAGAGCAACTTCTTTATCAAATCTGAGTGCTGAAAGTATATGAGATAATACACCCTAAAAAACATAAACAGAAAAAGTTAACTTCTTTAAAAGTAAATGCAAGTGCCTTTTATGTACAATGCCTACAATTTATTTGTACATGGGGGTGGTCTCTA
FANCC	FANCC_20	chr9	98002831	98003020	ACACTGACGACATGGTTCTACACATAGAACTGGATTCCACCCCAC	TACGGTAGCAGAGACTTGGTCTAGCCAAAAAATTCTAATATGGTGCTTA	190	34	CATAGAACTGGATTCCACCCCACCCCAAAATTTTTTTAAGCAGCACTTTTAAATAATCAATTTAATTCAAAGAAGTGCAGAGCAAGATTTACTCTCTTACCTGTATCCAGGAGTTAAGTTTTGATTGTCCAGAATTCTGTGGTTCTTTGTTAATTAGACAACATAAGCACCATATTAGAATTTTTTGGCT
FANCC	FANCC_21	chr9	98002937	98003135	ACACTGACGACATGGTTCTACACCAGGAGTTAAGTTTTGATTGTCCA	TACGGTAGCAGAGACTTGGTCTTGTTCTGTGAACTTAGTAGTTTGAGATTT	199	28	CCAGGAGTTAAGTTTTGATTGTCCAGAATTCTGTGGTTCTTTGTTAATTAGACAACATAAGCACCATATTAGAATTTTTTGGCTTTCATCTACAAAAAGGAAAACTTAATAAGTTTTATCAAGCAGAAAAAATCATTAATATAAAAACACTGTAAACATTATATTTAGGAAAATCTCAAACTACTAAGTTCACAGAACA
FANCC	FANCC_22	chr9	98009649	98009841	ACACTGACGACATGGTTCTACAAGCCTCTGTGAAACAATGCAAAG	TACGGTAGCAGAGACTTGGTCTTGCATAATGCCTTTACTGACCAAAA	193	34	AGCCTCTGTGAAACAATGCAAAGATTAAAATAGCCATTTTGAGAGGACACGTTTTTGATTCTTACCATATGCTAAAATAAAAGGATTCCAACAAGCTTTTGCCAACAGTTGACCAATTGTGGGGAATCTTTCAATGACTGTATTAGAATCCTGTGAAAGAAAAATAAATTTTGGTCAGTAAAGGCATTATGCA
FANCC	FANCC_23	chr9	98011303	98011496	ACACTGACGACATGGTTCTACACAGTCAATACCACAAGTCCCGAT	TACGGTAGCAGAGACTTGGTCTCACTTTGGAAACCCAGCAAGACA	194	45	CAGTCAATACCACAAGTCCCGATTCTGGGTGGCATTCTGTCTTGGTGAAATCTGGTAGAGTCCCTGAAGTCAGAAAATAATTTCATTATTCTGGTCCACTACTTACCATCTCTTTCAAGGCTTCATACATCTTCCTTAGGAACTCCTGGAACTGAGCCACGTGAAGACAGGTGTCTTGCTGGGTTTCCAAAGTG
FANCC	FANCC_24	chr9	98011392	98011579	ACACTGACGACATGGTTCTACATCTGGTCCACTACTTACCATCTCT	TACGGTAGCAGAGACTTGGTCTTCCAAGATGGCTCAAGATTCAGT	188	45	TCTGGTCCACTACTTACCATCTCTTTCAAGGCTTCATACATCTTCCTTAGGAACTCCTGGAACTGAGCCACGTGAAGACAGGTGTCTTGCTGGGTTTCCAAAGTGGAAGCCTGATCCCATACAGAAAGCTTCTGCATCCAAAACTGATAATCACAAGAAAGATCTACTGAATCTTGAGCCATCTTGGA
FANCC	FANCC_25	chr9	98011473	98011649	ACACTGACGACATGGTTCTACAGTGTCTTGCTGGGTTTCCAAAGT	TACGGTAGCAGAGACTTGGTCTTTAATGTGTGCCGACCATTTCCT	177	45	GTGTCTTGCTGGGTTTCCAAAGTGGAAGCCTGATCCCATACAGAAAGCTTCTGCATCCAAAACTGATAATCACAAGAAAGATCTACTGAATCTTGAGCCATCTTGGAAAAAGCGAAAAGGTGATGTCCCTTCACAGCAGCCTGTCCAGCACTGAAGGAAATGGTCGGCACACATTAA
FANCM	FANCM_1	chr14	45605182	45605372	ACACTGACGACATGGTTCTACAGAGCTGCTGCTGCTACGGATA	TACGGTAGCAGAGACTTGGTCTCGCTGCTGCTGGCAAAG	191	60	GAGCTGCTGCTGCTACGGATATCTGACAGAAGCCTTCGGTGGTTGTCGGCCTAATGAGCGGACGGCAAAGAACGCTTTTTCAGACGTGGGGCTCAAGTATCTCCCGATCATCTGGGACTCCGGGTTGCAGCTCCGGAACTGAGCGACCTCAGAGCCCTGGCAGCTCCAAGGCGCCTTTGCCAGCAGCAGCG
FANCM	FANCM_2	chr14	45605269	45605458	ACACTGACGACATGGTTCTACAGGGGCTCAAGTATCTCCCGAT	TACGGTAGCAGAGACTTGGTCTAACCCGCCATTCTCTAGACACAA	190	62	GGGGCTCAAGTATCTCCCGATCATCTGGGACTCCGGGTTGCAGCTCCGGAACTGAGCGACCTCAGAGCCCTGGCAGCTCCAAGGCGCCTTTGCCAGCAGCAGCGGAGGCTCAGCTGGAGTCGGACGATGATGTGTTGCTTGTCGCGGCGTACGAGGCTGAGCGGCAGTTGTGTCTAGAGAATGGCGGGTT
FANCM	FANCM_3	chr14	45605381	45605571	ACACTGACGACATGGTTCTACAGCTGGAGTCGGACGATGATG	TACGGTAGCAGAGACTTGGTCTTAGGCAGACACACCAGCGTATT	191	59	GCTGGAGTCGGACGATGATGTGTTGCTTGTCGCGGCGTACGAGGCTGAGCGGCAGTTGTGTCTAGAGAATGGCGGGTTCTGCACCTCCGCGGGCGCCCTGTGGATTTACCCTACCAATTGCCCAGTGCGGGACTACCAGCTGCACATTTCCCGGGCTGCTCTGTTTTGCAATACGCTGGTGTGTCTGCCTA
FANCM	FANCM_4	chr14	45605484	45605681	ACACTGACGACATGGTTCTACAATTTACCCTACCAATTGCCCAGT	TACGGTAGCAGAGACTTGGTCTCTGTGTCACCAAGGGTTTCGTTG	198	54	ATTTACCCTACCAATTGCCCAGTGCGGGACTACCAGCTGCACATTTCCCGGGCTGCTCTGTTTTGCAATACGCTGGTGTGTCTGCCTACCGGACTGGGAAAGACCTTTATTGCCGCCGTGGTCATGTACAATTTCTACCGCTGGTTCCCTTCAGGAAAGGTGGTCTTCATGGCCCCAACGAAACCCTTGGTGACACAG
FANCM	FANCM_5	chr14	45605591	45605780	ACACTGACGACATGGTTCTACATATTGCCGCCGTGGTCATGTA	TACGGTAGCAGAGACTTGGTCTCCCAGCTCTTACTTCAAAATTAGTCCA	190	51	TATTGCCGCCGTGGTCATGTACAATTTCTACCGCTGGTTCCCTTCAGGAAAGGTGGTCTTCATGGCCCCAACGAAACCCTTGGTGACACAGCAGATCGAGGCTTGCTACCAGGTGATGGGTATCCCGCAATCCCACATGGCCGAAATGACAGGTATCTTAGACTGGACTAATTTTGAAGTAAGAGCTGGG
FANCM	FANCM_6	chr14	45606189	45606378	ACACTGACGACATGGTTCTACATGCATTCTGAAAAAGCCAGACTA	TACGGTAGCAGAGACTTGGTCTAGCGGGACAAGCTCCTCTA	190	38	TGCATTCTGAAAAAGCCAGACTATTTATATTTTATAGATAACAGTCTGAAGTTTAGAATGTAGAATGTCACTTTTATTTTCAGGGTCTACACAAGCTTCCACCAGGAAGGAAATATGGTGCAGTAAGAGAGTGCTTTTTCTTACACCTCAGGTCATGGTAAATGACCTTTCTAGAGGAGCTTGTCCCGCT
FANCM	FANCM_7	chr14	45606289	45606487	ACACTGACGACATGGTTCTACAACCAGGAAGGAAATATGGTGCAG	TACGGTAGCAGAGACTTGGTCTCAGTACAGTTACAATACAAAATACCGTT	199	38	ACCAGGAAGGAAATATGGTGCAGTAAGAGAGTGCTTTTTCTTACACCTCAGGTCATGGTAAATGACCTTTCTAGAGGAGCTTGTCCCGCTGCTGAAATAAAGTGTTTAGTTATTGATGAAGCTCATAAAGCTCTCGGAAACTATGCTTATTGCCAGGTAATAATTTTGTTAAACGGTATTTTGTATTGTAACTGTACTG
FANCM	FANCM_9	chr14	45609793	45609943	ACACTGACGACATGGTTCTACATGCATTGAACAGATGAAACTAAAGAAC	TACGGTAGCAGAGACTTGGTCTACTGTAATAAATGGAAAAACATTTTACTTACCT	151	30	TGCATTGAACAGATGAAACTAAAGAACTTTTTTTTTCTTAAGGTTGTAAGAGAACTAGTCAAATATACAAATCACTTTAGAATCTTGGCTCTAAGTGCCACACCAGGTAGTGATATAAAGGTAAGTAAAATGTTTTTCCATTTATTACAGT
FANCM	FANCM_11	chr14	45617922	45618092	ACACTGACGACATGGTTCTACAATGATATAAATTTCTGGTGCTTCTTTCA	TACGGTAGCAGAGACTTGGTCTGAACGAAGCTCTATCTGCCCAAT	171	28	ATGATATAAATTTCTGGTGCTTCTTTCAAAATTTTACTGCTATTTTATTTCTGTTAGTGACTTAAACTAAAAAATTTTAACATGTAGTTTATAATCATACTTAATTGATTTCATATAGGCTGTGCAACAAGTTATTACTAACCTGCTAATTGGGCAGATAGAGCTTCGTTC
FANCM	FANCM_12	chr14	45618030	45618200	ACACTGACGACATGGTTCTACATTTCATATAGGCTGTGCAACAAGT	TACGGTAGCAGAGACTTGGTCTACCTGGATATAGGTCTTTTGGATGG	171	38	TTTCATATAGGCTGTGCAACAAGTTATTACTAACCTGCTAATTGGGCAGATAGAGCTTCGTTCTGAAGATTCTCCAGATATTTTGACATATTCTCATGAAAGAAAAGTTGAAAAGCTTATTGTTCCGCTTGGTGAAGAACTTGCAGCCATCCAAAAGACCTATATCCAGGT
FANCM	FANCM_13	chr14	45618065	45618250	ACACTGACGACATGGTTCTACATGCTAATTGGGCAGATAGAGCTTC	TACGGTAGCAGAGACTTGGTCTTTCAATTACCAGTTTATTTATGAAATCCCT	186	35	TGCTAATTGGGCAGATAGAGCTTCGTTCTGAAGATTCTCCAGATATTTTGACATATTCTCATGAAAGAAAAGTTGAAAAGCTTATTGTTCCGCTTGGTGAAGAACTTGCAGCCATCCAAAAGACCTATATCCAGGTAAACCATTTTTATGACATTTAGGGATTTCATAAATAAACTGGTAATTGAA
FANCM	FANCM_14	chr14	45620543	45620736	ACACTGACGACATGGTTCTACATGTACTTGAAAAAGGACTTTAGAGCA	TACGGTAGCAGAGACTTGGTCTCCTACCACAATATTCGGAGATGGG	194	35	TGTACTTGAAAAAGGACTTTAGAGCAAGCTTAAACTAGATTGCTTTTAAATTTGCAGATTTTGGAATCATTTGCTCGTTCTTTGATTCAGAGGAATGTTTTGATGAGAAGGGATATCCCAAATCTAACAAAATATCAGATAATTCTGGCAAGAGATCAGTTTAGGAAAAACCCATCTCCGAATATTGTGGTAGG
FANCM	FANCM_15	chr14	45620604	45620799	ACACTGACGACATGGTTCTACATGGAATCATTTGCTCGTTCTTTGA	TACGGTAGCAGAGACTTGGTCTACCTATGTTTTATCCTGGCTTTCAGT	196	33	TGGAATCATTTGCTCGTTCTTTGATTCAGAGGAATGTTTTGATGAGAAGGGATATCCCAAATCTAACAAAATATCAGATAATTCTGGCAAGAGATCAGTTTAGGAAAAACCCATCTCCGAATATTGTGGTAGGTATTTTTAAATAAATTTTGATGACAGATTAAATTTTCACTGAAAGCCAGGATAAAACATAGGT
FANCM	FANCM_16	chr14	45623055	45623248	ACACTGACGACATGGTTCTACAAACTTGGGCATGGAGCATGTAT	TACGGTAGCAGAGACTTGGTCTTCCATCCATAATTCCACAAAGGA	194	34	AACTTGGGCATGGAGCATGTATGTTCATTTATTTCTCTGGTTAAATTTGACATATGCTGTTTTTCTAGGGAATACAACAAGGCATAATCGAGGGAGAGTTTGCTATTTGTATTAGTTTATATCATGGTTATGAATTATTGCAGCAAATGGGAATGAGATCATTATATTTCTTCCTTTGTGGAATTATGGATGGA
FANCM	FANCM_17	chr14	45623136	45623329	ACACTGACGACATGGTTCTACAGCATAATCGAGGGAGAGTTTGCT	TACGGTAGCAGAGACTTGGTCTgcccagccCTTCAATATGTCTTT	194	30	GCATAATCGAGGGAGAGTTTGCTATTTGTATTAGTTTATATCATGGTTATGAATTATTGCAGCAAATGGGAATGAGATCATTATATTTCTTCCTTTGTGGAATTATGGATGGAACTAAAGGTAAATTATATCAAATTATTTAAAGAAATAATGACATGTATTATTTTGGCTAAAGACATATTGAAGggctgggc	One primer sits in the repeat region
FANCM	FANCM_18	chr14	45623790	45623985	ACACTGACGACATGGTTCTACAACACTTGAAAAACTTACATTCATTGCT	TACGGTAGCAGAGACTTGGTCTTGTACGTGCAAACATACACTCT	196	27	ACACTTGAAAAACTTACATTCATTGCTAAAGtttaatttctttttaataaataatacattttatcagttttattattatttatttGAAAACCTTTTCTTAATTTCTGAAGGGATGACACGGTCAAAAAATGAACTTGGCCGAAATGAAGACTTCATGAAACTCTATAATCATCTAGAGTGTATGTTTGCACGTACA
FANCM	FANCM_19	chr14	45623915	45624113	ACACTGACGACATGGTTCTACAAAAATGAACTTGGCCGAAATGAA	TACGGTAGCAGAGACTTGGTCTAGACATTTGCATCAAAGGAGCA	199	33	AAAATGAACTTGGCCGAAATGAAGACTTCATGAAACTCTATAATCATCTAGAGTGTATGTTTGCACGTACACGTAGTACTTCAGCAAATGGTATTTCTGCTATCCAACAAGGTCTGGTTTTTCTTTTAAAATTATGTATTGTGTTGTGTTTCTTAATCACAGTTAATTTTGAAATTTTGCTCCTTTGATGCAAATGTCT
FANCM	FANCM_20	chr14	45624477	45624670	ACACTGACGACATGGTTCTACATCCAACATATGCATTGGAAAAGATAAC	TACGGTAGCAGAGACTTGGTCTTGACCTACCATTCCATGACTTGA	194	26	tCCAACATATGCATTGGAAAAGATAACTTTCATATACATTAGTGTAATTGAATATGGAAAAAAACAGAAAAAAATTTTGATATTTTTGTTTTGTTCCAGGAGATAAAAATAAAAAATTTGTTTATAGTCATCCAAAGTTAAAGAAATTAGAAGAAGTTGTAATTGAACACTTCAAGTCATGGAATGGTAGGTCA	Assays designed by relax mode and have no off-target hits
FANCM	FANCM_21	chr14	45624589	45624738	ACACTGACGACATGGTTCTACAAAAATTTGTTTATAGTCATCCAAAGTTAAAGAA	TACGGTAGCAGAGACTTGGTCTCTGCACCCAGCCATAAGTAAAGT	150	33	AAAATTTGTTTATAGTCATCCAAAGTTAAAGAAATTAGAAGAAGTTGTAATTGAACACTTCAAGTCATGGAATGGTAGGTCATATTTAGTAGCTTTAAGGCAAGACAAAGTTATTGCAAGAGGTAAAACTTTACTTATggctgggtgcag	One primer sits in the repeat region
FANCM	FANCM_22	chr14	45628202	45628381	ACACTGACGACATGGTTCTACATCGTTAGCATTAACACTTTCAGGT	TACGGTAGCAGAGACTTGGTCTTGCAATTTCTTGAACACTATCTCG	180	30	TCGTTAGCATTAACACTTTCAGGTTTGTCTTTTGAACTATTTCTTGTCTAAATGCTTTGTAAAAAGTTGTAATTAAAGTTTTTATATATATATATAGCTGAAAACACTACTGAAAAGAAACGTGATGAGACCCGAGTTATGATCTTCTCTTCATTTCGAGATAGTGTTCAAGAAATTGCA
FANCM	FANCM_23	chr14	45628319	45628489	ACACTGACGACATGGTTCTACAAAACGTGATGAGACCCGAGTTATG	TACGGTAGCAGAGACTTGGTCTAATTACCTCCAGTTGCTCCTTCT	171	42	AAACGTGATGAGACCCGAGTTATGATCTTCTCTTCATTTCGAGATAGTGTTCAAGAAATTGCAGAAATGCTTTCACAGCATCAGCCAATTATTAGAGTAATGACTTTTGTCGGCCATGCCTCAGGGAAAAGCACGAAGGGTTTTACCCAGAAGGAGCAACTGGAGGTAATT
FANCM	FANCM_24	chr14	45628411	45628581	ACACTGACGACATGGTTCTACATAGAGTAATGACTTTTGTCGGCCAT	TACGGTAGCAGAGACTTGGTCTAGTAGCTAATTGACCAGTGAGTTAAAA	171	35	TAGAGTAATGACTTTTGTCGGCCATGCCTCAGGGAAAAGCACGAAGGGTTTTACCCAGAAGGAGCAACTGGAGGTAATTATTTTTGGAATTGATAAAAATAAAAATAAGATTGATTAGCTTTGCACTTGTTCTTTTTTTGTTAGTTTTAACTCACTGGTCAATTAGCTACT
FANCM	FANCM_25	chr14	45633488	45633686	ACACTGACGACATGGTTCTACATGGGGAAAAATATGCTTTGATCTACA	TACGGTAGCAGAGACTTGGTCTCGAATTGGGCTCTTCTGGGAAT	199	37	TGGGGAAAAATATGCTTTGATCTACAGTTCTCTTACATTTGCATGTAGTTATTTTTCAATTGTTTTTATTTTAGGTAGTGAAACAGTTTCGTGACGGTGGTTACAACACGCTGGTTTCTACCTGTGTGGGTGAAGAAGGTTTGGATATAGGAGAAGTTGATCTTATAATATGTTTTGATTCCCAGAAGAGCCCAATTCG
FANCM	FANCM_26	chr14	45633600	45633798	ACACTGACGACATGGTTCTACAGGTTTCTACCTGTGTGGGTGAAG	TACGGTAGCAGAGACTTGGTCTGTCAAATTGTGTTTCTGCAGCTCT	199	42	GGTTTCTACCTGTGTGGGTGAAGAAGGTTTGGATATAGGAGAAGTTGATCTTATAATATGTTTTGATTCCCAGAAGAGCCCAATTCGTCTTGTACAACGAATGGGTAGAACTGGCCGTAAACGTCAAGGCAGGATAGTTATTATCCTTTCTGAAGGACGAGAGGAACGTGTAAGTAGAGCTGCAGAAACACAATTTGAC
FANCM	FANCM_27	chr14	45636037	45636222	ACACTGACGACATGGTTCTACAGTGGATCGGGGTTTAATTTTATGTT	TACGGTAGCAGAGACTTGGTCTGAAGGACCTGCCTGTTACTTGA	186	27	GTGGATCGGGGTTTAATTTTATGTTTACAATAAATCCAAACTAATAATTGCTTGTTATGGATAAATTGTTATTTATAAAAGTAATATAATCTGACATTTTCTATTTGTTTTTACAGATTTATAATCAGAGTCAGTCCAACAAAAGAAGTATATATAAAGCTATTTCAAGTAACAGGCAGGTCCTTC
FANCM	FANCM_28	chr14	45636125	45636303	ACACTGACGACATGGTTCTACAATCTGACATTTTCTATTTGTTTTTACAGATTT	TACGGTAGCAGAGACTTGGTCTAGACACCATGTGTGATGAACATTT	179	34	ATCTGACATTTTCTATTTGTTTTTACAGATTTATAATCAGAGTCAGTCCAACAAAAGAAGTATATATAAAGCTATTTCAAGTAACAGGCAGGTCCTTCATTTTTACCAAAGAAGTCCACGAATGGTTCCTGATGGAATCAACCCAAAATTACACAAAATGTTCATCACACATGGTGTCT
FANCM	FANCM_29	chr14	45636229	45636424	ACACTGACGACATGGTTCTACAACCAAAGAAGTCCACGAATGGTT	TACGGTAGCAGAGACTTGGTCTCGACCTGCTAAGTAAGAACAGGG	196	40	ACCAAAGAAGTCCACGAATGGTTCCTGATGGAATCAACCCAAAATTACACAAAATGTTCATCACACATGGTGTCTATGAACCAGAGAAGCCTTCTCGGAACTTGCAGCGAAAGTCATCTATCTTTTCCTATAGGGATGGTAAATAAATTTTGCATTTGACACATGCATTTTTCCCCTGTTCTTACTTAGCAGGTCG
FANCM	FANCM_30	chr14	45639756	45639951	ACACTGACGACATGGTTCTACAAAAAAGTCTCTTTTCCATTATTTTTTCAACT	TACGGTAGCAGAGACTTGGTCTACTGGTTTGTTTTCCTCATTTTGTAA	196	30	AAAAAGTCTCTTTTCCATTATTTTTTCAACTTATAGGAATGAGGCAAAGTAGCCTAAAGAAAGATTGGTTCTTATCAGAAGAAGAATTTAAATTATGGAACAGACTTTATAGATTAAGGGACAGTGATGAAATTAAAGAGATAACATTGCCTCAAGTTCAGTTTTCTTCTTTACAAAATGAGGAAAACAAACCAGT
FANCM	FANCM_31	chr14	45639848	45640018	ACACTGACGACATGGTTCTACATTATGGAACAGACTTTATAGATTAAGGGACA	TACGGTAGCAGAGACTTGGTCTAACATCTGAGGGGTTCTGGCATT	171	35	TTATGGAACAGACTTTATAGATTAAGGGACAGTGATGAAATTAAAGAGATAACATTGCCTCAAGTTCAGTTTTCTTCTTTACAAAATGAGGAAAACAAACCAGTAAGTTGAATATATTTTCAGATGTTCTTTTCCCCCCCCTCATTTTAATGCCAGAACCCCTCAGATGTT
FANCM	FANCM_32	chr14	45642193	45642377	ACACTGACGACATGGTTCTACATTTAAAATTAGTTTGTGAAATCTCAGTATGTTT	TACGGTAGCAGAGACTTGGTCTGCCTATAAAATGGCGGCATCG	185	35	TTTAAAATTAGTTTGTGAAATCTCAGTATGTTTTCATCATTTTTATTACTTTTTAAATAATTAAGGCTCAAGAATCAACCACTGGAATTCATCAACTCTCTCTCTCTGAATGGAGACTGTGGCAAGATCATCCTTTGCCTACACATCAAGTTGATCACTCAGATCGATGCCGCCATTTTATAGGC
FANCM	FANCM_33	chr14	45642270	45642464	ACACTGACGACATGGTTCTACAACCACTGGAATTCATCAACTCTCT	TACGGTAGCAGAGACTTGGTCTACTCTAGTTTTACTATCATACCAGCAA	195	42	ACCACTGGAATTCATCAACTCTCTCTCTCTGAATGGAGACTGTGGCAAGATCATCCTTTGCCTACACATCAAGTTGATCACTCAGATCGATGCCGCCATTTTATAGGCCTTATGCAAATGATAGAGGGAATGAGACACGAAGAGGTGGGGTTTTATTGTAACTTTCTCTTGCTGGTATGATAGTAAAACTAGAGT
FANCM	FANCM_34	chr14	45644204	45644388	ACACTGACGACATGGTTCTACATCCTCTCTTAGATTTGGCTTTCTGT	TACGGTAGCAGAGACTTGGTCTTGATAAAGGTGTCACTGGCAAGA	185	34	TCCTCTCTTAGATTTGGCTTTCTGTTTTGTTTTGTTTTCCTGTGGCTTTTTAAATTTTCCTTATTTATAGGGAGAATGCAGCTATGAATTGGAAGTTGAATCTTATTTACAAATGGAAGATGTTACCTCAACATTTATTGCTCCCAGGAATGAATCTAATAATCTTGCCAGTGACACCTTTATCA
FANCM	FANCM_35	chr14	45644283	45644476	ACACTGACGACATGGTTCTACAAGCTATGAATTGGAAGTTGAATCTTATTT	TACGGTAGCAGAGACTTGGTCTACAATTTCAGCACATTCTTCATCA	194	34	AGCTATGAATTGGAAGTTGAATCTTATTTACAAATGGAAGATGTTACCTCAACATTTATTGCTCCCAGGAATGAATCTAATAATCTTGCCAGTGACACCTTTATCACTCACAAGAAATCGTCATTTATAAAGAACATAAATCAAGGCAGTTCATCCTCAGTGATAGAATCTGATGAAGAATGTGCTGAAATTGT
FANCM	FANCM_36	chr14	45644380	45644578	ACACTGACGACATGGTTCTACACCTTTATCACTCACAAGAAATCGTC	TACGGTAGCAGAGACTTGGTCTATACCGTGATTATTTTCTTTTTTAAGCTG	199	28	CCTTTATCACTCACAAGAAATCGTCATTTATAAAGAACATAAATCAAGGCAGTTCATCCTCAGTGATAGAATCTGATGAAGAATGTGCTGAAATTGTTAAACAAACTCATATCAAACCTACTAAAATTGTTTCTTTAAAGAAAAAAGTGTCTAAAGAAATAAAAAAAGATCAGCTTAAAAAAGAAAATAATCACGGTAT
FANCM	FANCM_37	chr14	45644484	45644677	ACACTGACGACATGGTTCTACAACTCATATCAAACCTACTAAAATTGTTTCT	TACGGTAGCAGAGACTTGGTCTGCAATTTCATCTGTATCTGATGTCCT	194	27	ACTCATATCAAACCTACTAAAATTGTTTCTTTAAAGAAAAAAGTGTCTAAAGAAATAAAAAAAGATCAGCTTAAAAAAGAAAATAATCACGGTATTATAGATTCTGTAGATAATGACAGAAATTCCACTGTTGAAAATATTTTTCAAGAAGACCTACCAAATGATAAAAGGACATCAGATACAGATGAAATTGC
FANCM	FANCM_38	chr14	45644546	45644724	ACACTGACGACATGGTTCTACAAGATCAGCTTAAAAAAGAAAATAATCACG	TACGGTAGCAGAGACTTGGTCTACACACACGGTTCTTTAATAACATTTTCA	179	30	AGATCAGCTTAAAAAAGAAAATAATCACGGTATTATAGATTCTGTAGATAATGACAGAAATTCCACTGTTGAAAATATTTTTCAAGAAGACCTACCAAATGATAAAAGGACATCAGATACAGATGAAATTGCTGCCACATGTACTATTAATGAAAATGTTATTAAAGAACCGTGTGTGT
FANCM	FANCM_39	chr14	45644663	45644850	ACACTGACGACATGGTTCTACATACAGATGAAATTGCTGCCACAT	TACGGTAGCAGAGACTTGGTCTCTTCGAATGGAAGAAATAAGTTAGATGA	188	31	TACAGATGAAATTGCTGCCACATGTACTATTAATGAAAATGTTATTAAAGAACCGTGTGTGTTATTAACAGAGTGTCAGTTTACAAATAAATCCACTAGTTCACTTGCTGGAAATGTTTTAGATTCTGGTTATAACAGTTTCAATGATGAAAAATCTGTTTCATCTAACTTATTTCTTCCATTCGAAG
FANCM	FANCM_40	chr14	45644768	45644961	ACACTGACGACATGGTTCTACATGCTGGAAATGTTTTAGATTCTGGT	TACGGTAGCAGAGACTTGGTCTTGAGAGGCGGAGGAGAATAAGAT	194	32	TGCTGGAAATGTTTTAGATTCTGGTTATAACAGTTTCAATGATGAAAAATCTGTTTCATCTAACTTATTTCTTCCATTCGAAGAAGAGCTTTATATTGTTAGAACAGATGACCAATTTTATAATTGTCACTCATTGACAAAAGAGGTACTAGCTAATGTAGAGAGATTTTTATCTTATTCTCCTCCGCCTCTCA
FANCM	FANCM_41	chr14	45644840	45645037	ACACTGACGACATGGTTCTACATCCATTCGAAGAAGAGCTTTATATTGT	TACGGTAGCAGAGACTTGGTCTTCTGCACAGGGTAAGAAAAGCAA	198	37	TCCATTCGAAGAAGAGCTTTATATTGTTAGAACAGATGACCAATTTTATAATTGTCACTCATTGACAAAAGAGGTACTAGCTAATGTAGAGAGATTTTTATCTTATTCTCCTCCGCCTCTCAGTGGACTCTCAGACTTGGAATATGAAATTGCTAAGGGTACTGCACTTGAGAATTTGCTTTTCTTACCCTGTGCAGA
FANCM	FANCM_42	chr14	45644973	45645167	ACACTGACGACATGGTTCTACAGACTTGGAATATGAAATTGCTAAGGGT	TACGGTAGCAGAGACTTGGTCTAGGTATATCATAAAGGCAACTTTTTTCAG	195	34	GACTTGGAATATGAAATTGCTAAGGGTACTGCACTTGAGAATTTGCTTTTCTTACCCTGTGCAGAGCATTTACGAAGTGATAAATGCACCTGTTTGCTGTCACATTCAGCTGTGAATTCTCAACAGAATTTAGAATTGAATTCACTTAAATGTATAAATTATCCATCTGAAAAAAGTTGCCTTTATGATATACCT
FANCM	FANCM_43	chr14	45645021	45645204	ACACTGACGACATGGTTCTACATTCTTACCCTGTGCAGAGCATTT	TACGGTAGCAGAGACTTGGTCTAGTCACAGAGACTTGGCTCA	184	34	TTCTTACCCTGTGCAGAGCATTTACGAAGTGATAAATGCACCTGTTTGCTGTCACATTCAGCTGTGAATTCTCAACAGAATTTAGAATTGAATTCACTTAAATGTATAAATTATCCATCTGAAAAAAGTTGCCTTTATGATATACCTAATGATAATATTTCTGATGAGCCAAGTCTCTGTGACT
FANCM	FANCM_44	chr14	45645134	45645329	ACACTGACGACATGGTTCTACATCCATCTGAAAAAAGTTGCCTTTATG	TACGGTAGCAGAGACTTGGTCTTGGGAGGTCACTGTTATCAACATC	196	35	TCCATCTGAAAAAAGTTGCCTTTATGATATACCTAATGATAATATTTCTGATGAGCCAAGTCTCTGTGACTGTGATGTACATAAACATAATCAAAATGAAAATTTAGTACCTAACAATCGTGTTCAAATACACAGAAGCCCTGCACAGAATTTAGTTGGAGAGAACAATCATGATGTTGATAACAGTGACCTCCCA
FANCM	FANCM_45	chr14	45645265	45645446	ACACTGACGACATGGTTCTACAACAGAAGCCCTGCACAGAATTTA	TACGGTAGCAGAGACTTGGTCTGTCTGACACAGGTAAAGATTCGC	182	40	ACAGAAGCCCTGCACAGAATTTAGTTGGAGAGAACAATCATGATGTTGATAACAGTGACCTCCCAGTATTGTCCACTGATCAAGATGAAAGTTTGCTGTTATTTGAAGATGTTAATACAGAGTTCGACGATGTGAGTCTTTCACCCTTGAACAGTAAAAGCGAATCTTTACCTGTGTCAGAC
FANCM	FANCM_46	chr14	45645350	45645547	ACACTGACGACATGGTTCTACATGAAAGTTTGCTGTTATTTGAAGATGT	TACGGTAGCAGAGACTTGGTCTTCACGGGTGATTTGATCTTGGAG	198	38	TGAAAGTTTGCTGTTATTTGAAGATGTTAATACAGAGTTCGACGATGTGAGTCTTTCACCCTTGAACAGTAAAAGCGAATCTTTACCTGTGTCAGACAAAACTGCTATTAGTGAAACGCCTCTGGTCTCTCAGTTCTTAATTTCTGATGAACTTTTGTTGGACAATAATTCTGAACTCCAAGATCAAATCACCCGTGA
FANCM	FANCM_47	chr14	45645453	45645651	ACACTGACGACATGGTTCTACAGCTATTAGTGAAACGCCTCTGGT	TACGGTAGCAGAGACTTGGTCTAGGTAACAGAAAATAAATCCCTAGAGCA	199	36	GCTATTAGTGAAACGCCTCTGGTCTCTCAGTTCTTAATTTCTGATGAACTTTTGTTGGACAATAATTCTGAACTCCAAGATCAAATCACCCGTGATGCTAATAGTTTTAAATCTCGTGATCAGAGAGGTGTACAGGAAGAAAAAGTGAAGAATCATGAGGATATTTTTGATTGCTCTAGGGATTTATTTTCTGTTACCT
FANCM	FANCM_48	chr14	45645521	45645696	ACACTGACGACATGGTTCTACATGAACTCCAAGATCAAATCACCC	TACGGTAGCAGAGACTTGGTCTCCAATATTTCATCATCAGAATCTGGACTAC	176	35	TGAACTCCAAGATCAAATCACCCGTGATGCTAATAGTTTTAAATCTCGTGATCAGAGAGGTGTACAGGAAGAAAAAGTGAAGAATCATGAGGATATTTTTGATTGCTCTAGGGATTTATTTTCTGTTACCTTTGATTTAGGATTCTGTAGTCCAGATTCTGATGATGAAATATTGG
FANCM	FANCM_49	chr14	45645610	45645808	ACACTGACGACATGGTTCTACAAGGATATTTTTGATTGCTCTAGGGAT	TACGGTAGCAGAGACTTGGTCTTCTCTTGGTATTAGTGCTTGATTCG	199	33	AGGATATTTTTGATTGCTCTAGGGATTTATTTTCTGTTACCTTTGATTTAGGATTCTGTAGTCCAGATTCTGATGATGAAATATTGGAACATACATCAGATAGCAATAGACCTCTAGATGATCTATATGGAAGGTATTTGGAAATTAAGGAGATAAGTGATGCAAATTATGTTTCGAATCAAGCACTAATACCAAGAGA
FANCM	FANCM_50	chr14	45645725	45645914	ACACTGACGACATGGTTCTACAAGATGATCTATATGGAAGGTATTTGGAA	TACGGTAGCAGAGACTTGGTCTTTCTTCATTTTTTGCTGCACTCA	190	32	AGATGATCTATATGGAAGGTATTTGGAAATTAAGGAGATAAGTGATGCAAATTATGTTTCGAATCAAGCACTAATACCAAGAGATCATAGTAAAAATTTTACTAGTGGAACTGTTATTATCCCATCAAATGAAGATATGCAGAATCCAAATTATGTACATTTGCCACTGAGTGCAGCAAAAAATGAAGAA
FANCM	FANCM_51	chr14	45645783	45645955	ACACTGACGACATGGTTCTACATCGAATCAAGCACTAATACCAAGAG	TACGGTAGCAGAGACTTGGTCTTGCACTGGTAAAGAAAACTGAGA	173	34	TCGAATCAAGCACTAATACCAAGAGATCATAGTAAAAATTTTACTAGTGGAACTGTTATTATCCCATCAAATGAAGATATGCAGAATCCAAATTATGTACATTTGCCACTGAGTGCAGCAAAAAATGAAGAATTGTTATCTCCTGGTTATTCTCAGTTTTCTTTACCAGTGCA
FANCM	FANCM_52	chr14	45645890	45646088	ACACTGACGACATGGTTCTACAACTGAGTGCAGCAAAAAATGAAG	TACGGTAGCAGAGACTTGGTCTCAATGCTTCTTTGAATCTTTGTAGGT	199	32	ACTGAGTGCAGCAAAAAATGAAGAATTGTTATCTCCTGGTTATTCTCAGTTTTCTTTACCAGTGCAAAAAAAAGTTATGAGTACACCACTCTCTAAATCAAACACATTGAACTCATTTTCTAAGATAAGAAAGGAAATACTTAAGACACCAGATTCTAGTAAGGAAAAAGTAAACCTACAAAGATTCAAAGAAGCATTG
FANCM	FANCM_53	chr14	45646016	45646186	ACACTGACGACATGGTTCTACAAAGAAAGGAAATACTTAAGACACCAGAT	TACGGTAGCAGAGACTTGGTCTATCTTACCTTCAACAGAATGACAGGA	171	32	AAGAAAGGAAATACTTAAGACACCAGATTCTAGTAAGGAAAAAGTAAACCTACAAAGATTCAAAGAAGCATTGAATTCAACTTTTGATTATTCAGAATTTTCTCTAGAAAAGTCTAAAAGCAGTGGTCCAATGTATCTGCATAAATCCTGTCATTCTGTTGAAGGTAAGAT
FANCM	FANCM_54	chr14	45646131	45646280	ACACTGACGACATGGTTCTACAAAAAGCAGTGGTCCAATGTATCTGC	TACGGTAGCAGAGACTTGGTCTTGTACCATGTACTAAAAAATTACATTTGGAAAAA	150	29	AAAAGCAGTGGTCCAATGTATCTGCATAAATCCTGTCATTCTGTTGAAGGTAAGATTCCATCTTTATAAAGTCTATAACTCTTTCTAGAATAATTACTCTAGAAATACTTTGGTAATTTTTCCAAATGTAATTTTTTAGTACATGGTACA
FANCM	FANCM_55	chr14	45650563	45650749	ACACTGACGACATGGTTCTACAAAAATAGATTGTTATGATTGGGTAAACCT	TACGGTAGCAGAGACTTGGTCTTTGTGATTACTGAATGACTCACCT	187	28	AAAATAGATTGTTATGATTGGGTAAACCTAAATCTATTAACCATTCattattttaaaaaataaattataGATGGACAATTATTAACAAGTAACGAAAGTGAAGATGACGAGATTTTCCGAAGAAAAGTTAAAAGAGCAAAAGGAAATGTTTTAAACTCTCCTGAGGTGAGTCATTCAGTAATCACAA
FANCM	FANCM_56	chr14	45650634	45650809	ACACTGACGACATGGTTCTACATGGACAATTATTAACAAGTAACGAAAGTG	TACGGTAGCAGAGACTTGGTCTAAAAGTCTCAGCAGAAGCCCAAG	176	34	TGGACAATTATTAACAAGTAACGAAAGTGAAGATGACGAGATTTTCCGAAGAAAAGTTAAAAGAGCAAAAGGAAATGTTTTAAACTCTCCTGAGGTGAGTCATTCAGTAATCACAATAGTATAATCATATCAAAGGCTATTTTCCTTTTATACCTTGGGCTTCTGCTGAGACTTTT
FANCM	FANCM_57	chr14	45650767	45650937	ACACTGACGACATGGTTCTACAAGGCTATTTTCCTTTTATACCTTGGG	TACGGTAGCAGAGACTTGGTCTTTACTATACATTACCTGGTATTTACTTACTCT	171	34	AGGCTATTTTCCTTTTATACCTTGGGCTTCTGCTGAGACTTTTGTTGCCTTTTACTTTATTTACTTACTTTAGGATCAGAAAAATAGTGAAGTTGATTCTCCACTTCATGCTGTCAAAAAGCGCAGATTTCCTATAAACAGAGTAAGTAAATACCAGGTAATGTATAGTAA
FANCM	FANCM_58	chr14	45650860	45651044	ACACTGACGACATGGTTCTACATGATTCTCCACTTCATGCTGTCAA	TACGGTAGCAGAGACTTGGTCTTCCAATCACATACAATAGAATATCAACTTT	185	29	TGATTCTCCACTTCATGCTGTCAAAAAGCGCAGATTTCCTATAAACAGAGTAAGTAAATACCAGGTAATGTATAGTAATCCAAATTCCTTTGGAATAAAAATTTTGAGAGAAATATATGTGTAGATAAATATAGGTATTTTTAATCCTTAGTAGAAAAGTTGATATTCTATTGTATGTGATTGGA
FANCM	FANCM_59	chr14	45652893	45653085	ACACTGACGACATGGTTCTACATGGCTCTGAGTTGTAAGAGCAAT	TACGGTAGCAGAGACTTGGTCTTTGGGACTTTGATGCCTCTTCTG	193	35	TGGCTCTGAGTTGTAAGAGCAATTTTACTTGTCTAGGAAGAAAATATTTTTTTCTTATGCAAGAATTTTGTCGAATTATTATAGTCAGAATTATCATCTAGTGATGAGAGTGAGAATTTTCCCAAACCATGTTCACAATTAGAAGACTTCAAGGTTTGTAACGGGAATGCCAGAAGAGGCATCAAAGTCCCAA
FANCM	FANCM_60	chr14	45653008	45653205	ACACTGACGACATGGTTCTACAATTTTCCCAAACCATGTTCACAA	TACGGTAGCAGAGACTTGGTCTTCTATAAAGAGAATGTATAGAGAAATCTACATTGA	198	31	ATTTTCCCAAACCATGTTCACAATTAGAAGACTTCAAGGTTTGTAACGGGAATGCCAGAAGAGGCATCAAAGTCCCAAAGAGACAGAGTCACTTAAAGGTAATCTTTTTTTTAGTTTCTTTAAATATGTATGCATTTTATCAGTAAAGATAATTGGTTTTACATCAATGTAGATTTCTCTATACATTCTCTTTATAGA
FANCM	FANCM_61	chr14	45654381	45654577	ACACTGACGACATGGTTCTACATCACTGATATCTTCATGTTTTCTAATTTGT	TACGGTAGCAGAGACTTGGTCTCCATTTATAGCCTGTGAAAGTTGAGT	197	32	TCACTGATATCTTCATGTTTTCTAATTTGTCTTACTTAGCATGTAGCTAGGAAGTTTTTAGATGATGAAGCAGAACTTTCTGAAGAAGATGCAGAATATGTTTCATCAGATGAAAATGATGAGTCAGAAAATGAACAAGATTCCTCATTACTTGACTTTTTAAATGATGAAACTCAACTTTCACAGGCTATAAATGG
FANCM	FANCM_62	chr14	45654500	45654694	ACACTGACGACATGGTTCTACATGAGTCAGAAAATGAACAAGATTCC	TACGGTAGCAGAGACTTGGTCTTGCACGTACCACATTTAATTACCTT	195	26	TGAGTCAGAAAATGAACAAGATTCCTCATTACTTGACTTTTTAAATGATGAAACTCAACTTTCACAGGCTATAAATGGTAAATGTTATAATGATCCTTAAAATTTTTTTCAATGTTTTTATGTGCTTATATTTAAATATTTTAATCAGTTTTTAATGAAACTAGACCTTAAAGGTAATTAAATGTGGTACGTGCA
FANCM	FANCM_63	chr14	45656873	45657046	ACACTGACGACATGGTTCTACAATTTGCACAAGGTTTGAATCAAGTA	TACGGTAGCAGAGACTTGGTCTTGTACTTATTGTTCATCATTGGACTACG	174	26	ATTTGCACAAGGTTTGAATCAAGTAAATTTGAAATAGATTGAAGTTAAATACTTTACTGGTTTTCATTTAAATAATTTTGCTAATTTATCTAAATTCTTATCTTTACACAGATTCTGAAATGAGAGCTATTTACATGAAATCTTTGCGTAGTCCAATGATGAACAATAAGTACA
FANCM	FANCM_64	chr14	45656965	45657114	ACACTGACGACATGGTTCTACAAATTCTTATCTTTACACAGATTCTGAAATGAGAGC	TACGGTAGCAGAGACTTGGTCTCCATTATATTTCTATAGTTCATACCTGCGAGA	150	29	AATTCTTATCTTTACACAGATTCTGAAATGAGAGCTATTTACATGAAATCTTTGCGTAGTCCAATGATGAACAATAAGTACAAAATGATTCATAAGACACATAAAAACATAAACATTTTCTCGCAGGTATGAACTATAGAAATATAATGG
FANCM	FANCM_65	chr14	45657005	45657197	ACACTGACGACATGGTTCTACAACATGAAATCTTTGCGTAGTCCA	TACGGTAGCAGAGACTTGGTCTATAGCTCTGACAGCCCAGTTTTA	193	33	ACATGAAATCTTTGCGTAGTCCAATGATGAACAATAAGTACAAAATGATTCATAAGACACATAAAAACATAAACATTTTCTCGCAGGTATGAACTATAGAAATATAATGGAGAATTTCTGGATGATGATGTTGAAATATGTTCCTGTTAGTGAAGCCTCCATTTTGTTTCTAAAACTGGGCTGTCAGAGCTAT
FANCM	FANCM_66	chr14	45657918	45658088	ACACTGACGACATGGTTCTACATGCAGATTTCATGTGCCTAGAAGT	TACGGTAGCAGAGACTTGGTCTTTCTTCACTTGATTGGCCTTTGC	171	31	TGCAGATTTCATGTGCCTAGAAGTATATTTTAAATACCTGTTAATTGTCTGAAATAAATATAAAACATTCTTGTGTTTTTATTGTAGATTCCTGAACAAGATGAAACCTATTTAGAGGATAGTTTTTGTGTTGATGAAGAGGAGTCTTGCAAAGGCCAATCAAGTGAAGAA
FANCM	FANCM_67	chr14	45658038	45658224	ACACTGACGACATGGTTCTACAAGTTTTTGTGTTGATGAAGAGGAGT	TACGGTAGCAGAGACTTGGTCTTTCTGGATAATTTCTTTTTTGAATGTGC	187	32	AGTTTTTGTGTTGATGAAGAGGAGTCTTGCAAAGGCCAATCAAGTGAAGAAGAAGTTTGTGTTGATTTTAACTTAATAACTGATGATTGCTTTGCAAATAGTAAAAAGTATAAAACTCGACGTGCAGTAATGCTAAAAGAAATGATGGAACAAAATTGTGCACATTCAAAAAAGAAATTATCCAGAA
FANCM	FANCM_68	chr14	45658152	45658337	ACACTGACGACATGGTTCTACAACTCGACGTGCAGTAATGCTAAA	TACGGTAGCAGAGACTTGGTCTACAATGGTCCTGTTGTTTGTTCT	186	34	ACTCGACGTGCAGTAATGCTAAAAGAAATGATGGAACAAAATTGTGCACATTCAAAAAAGAAATTATCCAGAATTATTTTACCAGATGATTCAAGTGAGGAGGAGAACAATGTAAATGATAAAAGAGAATCTAATATTGCGGTTAACCCAAGCACTGTTAAGAAGAACAAACAACAGGACCATTGT
FANCM	FANCM_69	chr14	45658195	45658365	ACACTGACGACATGGTTCTACAGTGCACATTCAAAAAAGAAATTATCCA	TACGGTAGCAGAGACTTGGTCTCAGAAGATCCAGAAGGCACTGAA	171	35	GTGCACATTCAAAAAAGAAATTATCCAGAATTATTTTACCAGATGATTCAAGTGAGGAGGAGAACAATGTAAATGATAAAAGAGAATCTAATATTGCGGTTAACCCAAGCACTGTTAAGAAGAACAAACAACAGGACCATTGTTTAAATTCAGTGCCTTCTGGATCTTCTG
FANCM	FANCM_70	chr14	45658311	45658507	ACACTGACGACATGGTTCTACAAAGAAGAACAAACAACAGGACCA	TACGGTAGCAGAGACTTGGTCTGGTGTGGTAGACTGGACTTCATTA	197	42	AAGAAGAACAAACAACAGGACCATTGTTTAAATTCAGTGCCTTCTGGATCTTCTGCGCAGTCCAAGGTGCGTTCTACTCCAAGAGTTAATCCATTAGCAAAGCAGAGCAAACAGACATCGCTGAATTTAAAGGATACAATTTCCGAAGTCTCAGACTTCAAACCTCAGAATCATAATGAAGTCCAGTCTACCACACC
FANCM	FANCM_71	chr14	45658460	45658644	ACACTGACGACATGGTTCTACACTCAGACTTCAAACCTCAGAATCA	TACGGTAGCAGAGACTTGGTCTACAAAACACACACACAAGAAAGAA	185	37	CTCAGACTTCAAACCTCAGAATCATAATGAAGTCCAGTCTACCACACCACCCTTCACTACTGTTGATTCACAGAAAGACTGTAGAAAATTTCCAGTTCCACAGAAGGTATGGATCAAAGAAAGGAAAAATATCTTTAGATGGTTACCAGAAGTTTTTCTTTTTCTTTCTTGTGTGTGTGTTTTGT
FANCM	FANCM_72	chr14	45665316	45665493	ACACTGACGACATGGTTCTACACGTTTATGGCATTTTTATGCATTTAACCT	TACGGTAGCAGAGACTTGGTCTATACAGGTTCCTTTTCCTTCCTG	178	43	CGTTTATGGCATTTTTATGCATTTAACCTGAATGTGACCAGTGTTTTCCACTTTTTCAGGATGGTAGTGCTTTGGAGGATTCTAGCACTTCAGGGGCATCCTGTTCCAAGTCAAGACCACATTTAGCTGGGACACATACTTCTCTTAGACTTCCGCAGGAAGGAAAAGGAACCTGTAT
FANCM	FANCM_73	chr14	45665413	45665595	ACACTGACGACATGGTTCTACAATCCTGTTCCAAGTCAAGACCAC	TACGGTAGCAGAGACTTGGTCTTCACAGCCATTAAGAGGACAAACT	183	42	ATCCTGTTCCAAGTCAAGACCACATTTAGCTGGGACACATACTTCTCTTAGACTTCCGCAGGAAGGAAAAGGAACCTGTATTCTTGTAGGTGGTCATGAAATCACTTCTGGATTAGAAGTAATTTCTTCCCTAAGAGCAATTCATGGGTTGCAAGTAGAAGTTTGTCCTCTTAATGGCTGTGA
FANCM	FANCM_74	chr14	45665470	45665643	ACACTGACGACATGGTTCTACAGCAGGAAGGAAAAGGAACCTGTA	TACGGTAGCAGAGACTTGGTCTTCAGATTGAGACCTCCTTTCCAC	174	42	GCAGGAAGGAAAAGGAACCTGTATTCTTGTAGGTGGTCATGAAATCACTTCTGGATTAGAAGTAATTTCTTCCCTAAGAGCAATTCATGGGTTGCAAGTAGAAGTTTGTCCTCTTAATGGCTGTGATTACATCGTGAGTAATCGCATGGTGGTGGAAAGGAGGTCTCAATCTGA
FANCM	FANCM_75	chr14	45665558	45665739	ACACTGACGACATGGTTCTACAGGGTTGCAAGTAGAAGTTTGTCC	TACGGTAGCAGAGACTTGGTCTCTGTCCTTTTCCACAATCACACA	182	41	GGGTTGCAAGTAGAAGTTTGTCCTCTTAATGGCTGTGATTACATCGTGAGTAATCGCATGGTGGTGGAAAGGAGGTCTCAATCTGAGATGTTAAATAGTGTCAATAAGAACAAGTTCATTGAGCAGATCCAGCACCTGCAGAGTATGTTTGAAAGAATATGTGTGATTGTGGAAAAGGACAG
FANCM	FANCM_76	chr14	45665606	45665797	ACACTGACGACATGGTTCTACAAGTAATCGCATGGTGGTGGAAA	TACGGTAGCAGAGACTTGGTCTAAAGTTCCTTTACAGTCTTATAAACAAAGA	192	35	AGTAATCGCATGGTGGTGGAAAGGAGGTCTCAATCTGAGATGTTAAATAGTGTCAATAAGAACAAGTTCATTGAGCAGATCCAGCACCTGCAGAGTATGTTTGAAAGAATATGTGTGATTGTGGAAAAGGACAGAGAAAAAACAGGTTTGTATTTTTAAATATCTTTGTTTATAAGACTGTAAAGGAACTTT
FANCM	FANCM_77	chr14	45667735	45667926	ACACTGACGACATGGTTCTACAACCAGTTTGCTCAATGGTGTAGAT	TACGGTAGCAGAGACTTGGTCTAATTCGGATTCCAGCGCCAAT	192	34	ACCAGTTTGCTCAATGGTGTAGATCTTGGGattttaataaaataaagtatattaataattCTACTTAATATTAGTTACTGAAGTTTGCCTTTCCCTAAATATGAATATTTAGGAGACACATCAAGGATGTTTAGGAGAACAAAGAGCTATGACAGCCTGCTGACTACCTTAATTGGCGCTGGAATCCGAATT
FANCM	FANCM_78	chr14	45667845	45668024	ACACTGACGACATGGTTCTACAAGGAGACACATCAAGGATGTTTAGG	TACGGTAGCAGAGACTTGGTCTACCACTGTTGGAACATGAATACCA	180	42	AGGAGACACATCAAGGATGTTTAGGAGAACAAAGAGCTATGACAGCCTGCTGACTACCTTAATTGGCGCTGGAATCCGAATTCTTTTCAGTTCCTGCCAAGAAGAAACCGCAGATTTGCTAAAGGAACTGTCTTTAGTGGAACAAAGAAAGAATGTTGGTATTCATGTTCCAACAGTGGT
FANCM	FANCM_79	chr14	45667950	45668139	ACACTGACGACATGGTTCTACAAACCGCAGATTTGCTAAAGGAAC	TACGGTAGCAGAGACTTGGTCTCCTGTTAGCCATCCTTTTCACAG	190	35	AACCGCAGATTTGCTAAAGGAACTGTCTTTAGTGGAACAAAGAAAGAATGTTGGTATTCATGTTCCAACAGTGGTGAATAGTAATAAAAGTGAGGCACTCCAGTTTTATTTAAGTATTCCCAATATAAGTTATATAACTGCATTAAATATGTGTCACCAGTTTTCATCTGTGAAAAGGATGGCTAACAGG
FANCM	FANCM_80	chr14	45668036	45668206	ACACTGACGACATGGTTCTACAAAAGTGAGGCACTCCAGTTTTAT	TACGGTAGCAGAGACTTGGTCTAAACTTCTATGGAATGCTTTTACGAA	171	29	AAAGTGAGGCACTCCAGTTTTATTTAAGTATTCCCAATATAAGTTATATAACTGCATTAAATATGTGTCACCAGTTTTCATCTGTGAAAAGGATGGCTAACAGGTATGTCTGTTGTAATATTTTTAAATGATTACTTTTAAAAGATTCGTAAAAGCATTCCATAGAAGTTT
FANCM	FANCM_81	chr14	45668987	45669185	ACACTGACGACATGGTTCTACAACTGTGTTTGGTGTTCTTTAGGT	TACGGTAGCAGAGACTTGGTCTGGTTAAGATCATTTGGTAACATTTGTATG	199	31	ACTGTGTTTGGTGTTCTTTAGGTAATATTAAATTTTATAAAAGCCAAAAGTCCTAGTGTAATGATTTTGTCTCATTTATTTTTCAGCTCACTTCAAGAAATCTCCATGTATGCACAAGTAACTCATCAGAAGGCTGAGGAGATCTATAGATATATTCACTATGTATTTGACATACAAATGTTACCAAATGATCTTAACC
FANCM	FANCM_82	chr14	45669069	45669267	ACACTGACGACATGGTTCTACATCAGCTCACTTCAAGAAATCTCCAT	TACGGTAGCAGAGACTTGGTCTTGAAGTGCATTTAATATTGTGAGAGGT	199	35	TCAGCTCACTTCAAGAAATCTCCATGTATGCACAAGTAACTCATCAGAAGGCTGAGGAGATCTATAGATATATTCACTATGTATTTGACATACAAATGTTACCAAATGATCTTAACCAAGATAGACTGAAATCTGATATATAATCAAGCTGCTCAAGATGGGGTTTTCAAAGACCTCTCACAATATTAAATGCACTTCA
GEN1	GEN1_1	chr2	17941126	17941320	ACACTGACGACATGGTTCTACAATTGTTTGAATTCCTGTTATGAGCTT	TACGGTAGCAGAGACTTGGTCTTCACACACCCAGAGACTCAGAT	195	39	ATTGTTTGAATTCCTGTTATGAGCTTCTGTTTCTTTAACAATATTTTGTAAAGTGTGTTTCACATAACAGCAGATAATCACCAGAATGGGAGTGAATGACTTGTGGCAAATTTTGGAGCCTGTTAAGCAACACATCCCCTTGCGTAATCTTGGTGGGAAAACCATTGCAGTTGATCTGAGTCTCTGGGTGTGTGA
GEN1	GEN1_2	chr2	17941206	17941377	ACACTGACGACATGGTTCTACACCAGAATGGGAGTGAATGACTTGT	TACGGTAGCAGAGACTTGGTCTCTATACCTGAGGTGGGGCTTCAT	172	48	CCAGAATGGGAGTGAATGACTTGTGGCAAATTTTGGAGCCTGTTAAGCAACACATCCCCTTGCGTAATCTTGGTGGGAAAACCATTGCAGTTGATCTGAGTCTCTGGGTGTGTGAGGCACAGACAGTCAAAAAAATGATGGGCAGCGTCATGAAGCCCCACCTCAGGTATAG
GEN1	GEN1_3	chr2	17941295	17941485	ACACTGACGACATGGTTCTACAGTTGATCTGAGTCTCTGGGTGTG	TACGGTAGCAGAGACTTGGTCTACCTCAAAATGTAAAAGAATAACAACAACA	191	37	GTTGATCTGAGTCTCTGGGTGTGTGAGGCACAGACAGTCAAAAAAATGATGGGCAGCGTCATGAAGCCCCACCTCAGGTATAGTAAAAGCTCTTACAGTATAAATGTATGATGTATAAACAGTCTTGGTATCTTGATTTTGTTTCACCTTTTTTTTTCTTTTGTTGTTGTTATTCTTTTACATTTTGAGGT
GEN1	GEN1_4	chr2	17942574	17942756	ACACTGACGACATGGTTCTACAAGTCTAATGTTCTTGCCTTTGTGT	TACGGTAGCAGAGACTTGGTCTGACATCAGCTTTCAGCTTTGGTG	183	30	AGTCTAATGTTCTTGCCTTTGTGTTATACTATTTTGACTTTTACTATCAGTGTTTGATGATTAATGTATTACTAATTTATATATTTCAGGAACTTATTTTTTCGTATCTCATATTTAACACAAATGGATGTAAAACTGGTATTTGTTATGGAAGGGGAACCACCAAAGCTGAAAGCTGATGTC
GEN1	GEN1_5	chr2	17942657	17942831	ACACTGACGACATGGTTCTACATTTCAGGAACTTATTTTTTCGTATCTCA	TACGGTAGCAGAGACTTGGTCTAAAATGTGATCTCCCTGTTTTCTG	175	38	TTTCAGGAACTTATTTTTTCGTATCTCATATTTAACACAAATGGATGTAAAACTGGTATTTGTTATGGAAGGGGAACCACCAAAGCTGAAAGCTGATGTCATAAGCAAGAGGAATCAGTCTCGGTATGGGTCTTCTGGAAAATCGTGGTCTCAGAAAACAGGGAGATCACATTTT
GEN1	GEN1_6	chr2	17942719	17942908	ACACTGACGACATGGTTCTACATTATGGAAGGGGAACCACCAAAG	TACGGTAGCAGAGACTTGGTCTAGAGTAAAATGCACCCTTTAATTCAAATC	190	40	TTATGGAAGGGGAACCACCAAAGCTGAAAGCTGATGTCATAAGCAAGAGGAATCAGTCTCGGTATGGGTCTTCTGGAAAATCGTGGTCTCAGAAAACAGGGAGATCACATTTTAAATCAGTCTTAAGAGAGGTGAGCATTCAGATTTGATTCAGTAATTCCGATTTGAATTAAAGGGTGCATTTTACTCT
GEN1	GEN1_7	chr2	17946104	17946302	ACACTGACGACATGGTTCTACAAGTAAATAAATGAGCAGTGAAAACATTCT	TACGGTAGCAGAGACTTGGTCTCCCCATAAAGGAAAGTATCTCCATC	199	46	AGTAAATAAATGAGCAGTGAAAACATTCTTTAACATCTTGCACCTGCTTTTTGTTTTCAGTGCCTCCATATGCTCGAATGCTTAGGAATCCCCTGGGTTCAGGCTGCTGGGGAAGCTGAAGCCATGTGTGCTTATCTCAATGCTGGTGGTCATGTCGATGGCTGCCTCACCAATGATGGAGATACTTTCCTTTATGGGG
GEN1	GEN1_8	chr2	17946176	17946374	ACACTGACGACATGGTTCTACACTCGAATGCTTAGGAATCCCCTG	TACGGTAGCAGAGACTTGGTCTAACAAATGCTGAAAAAGAGAAAGAAAAT	199	45	CTCGAATGCTTAGGAATCCCCTGGGTTCAGGCTGCTGGGGAAGCTGAAGCCATGTGTGCTTATCTCAATGCTGGTGGTCATGTCGATGGCTGCCTCACCAATGATGGAGATACTTTCCTTTATGGGGCCCAGACTGTTTACAGGAATTTCACTATGAATACAAAGGTGTTTATTTTCTTTCTCTTTTTCAGCATTTGTT
GEN1	GEN1_9	chr2	17947766	17947954	ACACTGACGACATGGTTCTACATGACAAATTATTTTTGTAATGTGGTTTAATGT	TACGGTAGCAGAGACTTGGTCTTTGGGAGATAATCACAGCCAAGA	189	33	TGACAAATTATTTTTGTAATGTGGTTTAATGTATAAATATGTACTTTTTGAGGATTAAACTAAATCTGTTCTTTCTTTAGGACCCACATGTTGACTGTTACACAATGTCATCTATCAAGAGTAAACTAGGTTTGGATAGAGATGCTCTGGTTGGATTAGCAATACTTCTTGGCTGTGATTATCTCCCAA
GEN1	GEN1_10	chr2	17947824	17948009	ACACTGACGACATGGTTCTACAACTAAATCTGTTCTTTCTTTAGGACCC	TACGGTAGCAGAGACTTGGTCTAAGTACGAAAAAGACTTTATGAATAGCA	186	35	ACTAAATCTGTTCTTTCTTTAGGACCCACATGTTGACTGTTACACAATGTCATCTATCAAGAGTAAACTAGGTTTGGATAGAGATGCTCTGGTTGGATTAGCAATACTTCTTGGCTGTGATTATCTCCCAAAGGTAAGCTGAAATTGTCATATTTATTTGCTATTCATAAAGTCTTTTTCGTACTT
GEN1	GEN1_11	chr2	17949877	17950068	ACACTGACGACATGGTTCTACAATCTTTTCCTATCTTTATTGAAGAGTTACC	TACGGTAGCAGAGACTTGGTCTAACTTTGCCCTTTCAAAATCTGTAT	192	34	atcttttcctatctttattgaagagttacctcattctttcagctgctgactcttccgttcaattaatatacttttaaccattcctagtgattaacattggaattatttTTTTTCCCACTTTCTGAAAGGGAGTCCCTGGAGTTGGAAAAGAGCAAGCATTAAAACTTATACAGATTTTGAAAGGGCAAAGTT	One primer sits in the repeat region
GEN1	GEN1_12	chr2	17950006	17950155	ACACTGACGACATGGTTCTACAGAGTCCCTGGAGTTGGAAAAGAG	TACGGTAGCAGAGACTTGGTCTTGTTTCCTGTACTATTCGTTATTAAGTTC	150	34	GAGTCCCTGGAGTTGGAAAAGAGCAAGCATTAAAACTTATACAGATTTTGAAAGGGCAAAGTTTACTTCAGAGGTAACTAATAATTACTTTCTCTTGTGACATTGAACCTTTATTCTTGCTGAACTTAATAACGAATAGTACAGGAAACA
GEN1	GEN1_13	chr2	17952403	17952589	ACACTGACGACATGGTTCTACAACATACCGTTTTTGTGACCTCAT	TACGGTAGCAGAGACTTGGTCTTGAGATACTAATAACCATTCCCTATGTC	187	36	ACATACCGTTTTTGTGACCTCATTTTTTTTCCTTTTTTTAAAAACCACTTTCTATTAAAGGTTTAATCGGTGGAATGAAACATCTTGTAACTCTAGTCCACAACTGCTAGTCACTAAAAAACTGGCTCATTGTTCCGTATGTTCCCATCCAGGTAAGGAGACATAGGGAATGGTTATTAGTATCTCA
GEN1	GEN1_14	chr2	17953811	17953998	ACACTGACGACATGGTTCTACATGGAAAATTTAGATACTGGCAAAAAGAA	TACGGTAGCAGAGACTTGGTCTCCACTCACAAGGACAGCAGTATT	188	32	TGGAAAATTTAGATACTGGCAAAAAGAATGTATGTAGAAAGTAATTATAAAAGGCAAAAAATATTATACTTTTTTTGGGTCTCCATAAAGGTTCACCTAAGGATCATGAACGTAATGGATGCAGATTATGTAAAAGTGATAAATATTGTGAGCCACATGACTATGAATACTGCTGTCCTTGTGAGTGG
GEN1	GEN1_15	chr2	17953911	17954100	ACACTGACGACATGGTTCTACAGGATCATGAACGTAATGGATGCAG	TACGGTAGCAGAGACTTGGTCTTGTGTATAGGTCATGCCAGGAAA	190	36	GGATCATGAACGTAATGGATGCAGATTATGTAAAAGTGATAAATATTGTGAGCCACATGACTATGAATACTGCTGTCCTTGTGAGTGGCACCGTACAGAACATGATAGGCAACTCAGTGAAGTAGAGAACAATATTAAGAAGTAAGTTTTTTTAAAAACTCATGATTTTTCCTGGCATGACCTATACACA
GEN1	GEN1_16	chr2	17954285	17954483	ACACTGACGACATGGTTCTACAGAGGAGATTGGCTGAGATGATT	TACGGTAGCAGAGACTTGGTCTAGCAAGAAAAAAGAAAATAGAAACTGAGA	199	30	gaggagattggctgagatgatttcagagtcTAAAATTGTCTGATTATAGTAATAACATGTATATAATTTTTTTTTCAGGAAAGCTTGCTGTTGTGAGGGATTCCCATTCCATGAGGTAATATCCAGTAATTCAACTCTATTAATTTTAGAAACTTTCTTAAAAGTTTAAATCTCAGTTTCTATTTTCTTTTTTCTTGCT	One primer sits in the repeat region
GEN1	GEN1_17	chr2	17954379	17954568	ACACTGACGACATGGTTCTACAGAGGGATTCCCATTCCATGAGGT	TACGGTAGCAGAGACTTGGTCTACCTGAAACAATAACAAATCAGGTCT	190	31	GAGGGATTCCCATTCCATGAGGTAATATCCAGTAATTCAACTCTATTAATTTTAGAAACTTTCTTAAAAGTTTAAATCTCAGTTTCTATTTTCTTTTTTCTTGCTAGGTTATTCAAGAATTCCTTTTAAACAAGGATAAATTGGTGAAGGTTATCAGGTACCAAAGACCTGATTTGTTATTGTTTCAGGT
GEN1	GEN1_18	chr2	17954511	17954693	ACACTGACGACATGGTTCTACAAGGATAAATTGGTGAAGGTTATCAGGT	TACGGTAGCAGAGACTTGGTCTGCTGAAAAAATATAAGAGCTGCCTGTTT	183	33	AGGATAAATTGGTGAAGGTTATCAGGTACCAAAGACCTGATTTGTTATTGTTTCAGGTATCTGAAAATAAATTCTTCTTTACTGTATGAAGTTATATGCTGGAAAGATAGGAACAGATATTCACTCTGATTGGTCTTAGAGGAGGTTTAAAATTAAAACAGGCAGCTCTTATATTTTTTCAGC
GEN1	GEN1_19	chr2	17955473	17955648	ACACTGACGACATGGTTCTACAACCTAGGAGTGCTATTTGTCTCCA	TACGGTAGCAGAGACTTGGTCTAGAGTTTCTGCTACCAAGCTTTC	176	34	ACCTAGGAGTGCTATTTGTCTCCAAGAGATAACAAAATCTTGttttatttttattatatttataGAGATTTACTCTTGAAAAAATGGAGTGGCCCAATCACTATGCATGTGAGAAATTGCTGGTACTTTTGACCCATTATGACATGATAGAAAGAAAGCTTGGTAGCAGAAACTCT
GEN1	GEN1_20	chr2	17955536	17955685	ACACTGACGACATGGTTCTACAaGAGATTTACTCTTGAAAAAATGGAGTGG	TACGGTAGCAGAGACTTGGTCTACAGTTCTTTACATTACCGAATTGGC	150	37	aGAGATTTACTCTTGAAAAAATGGAGTGGCCCAATCACTATGCATGTGAGAAATTGCTGGTACTTTTGACCCATTATGACATGATAGAAAGAAAGCTTGGTAGCAGAAACTCTAATCAACTACAGCCAATTCGGTAATGTAAAGAACTGT	One primer sits in the repeat region
GEN1	GEN1_21	chr2	17955625	17955795	ACACTGACGACATGGTTCTACAAGAAAGCTTGGTAGCAGAAACTC	TACGGTAGCAGAGACTTGGTCTAGCTTTTAATATTCCAGGAGGCCTTT	171	34	AGAAAGCTTGGTAGCAGAAACTCTAATCAACTACAGCCAATTCGGTAATGTAAAGAACTGTATGGTGAAGGTGGTGTTTTTACTTGAGTATTTTATAATTAAAATATTCCTAATATCTTTAAGCTCGTTTTTGTAAAGGTGGAGGAAAGGCCTCCTGGAATATTAAAAGCT
GEN1	GEN1_22	chr2	17959189	17959386	ACACTGACGACATGGTTCTACATGGAAATTATTCAGGTTAGAAATGGAAA	TACGGTAGCAGAGACTTGGTCTAGACATACATGGTCAAATATTATAAATGGAA	198	28	TGGAAATTATTCAGGTTAGAAATGGAAAATTTCCAAATATCTTATGCAATTAGACTTCATTAAATGAATTTGTTTTTCAGAATTGTTAAGACTCGAATCAGAAATGGAGTTCATTGTTTTGAAATAGAATGGGAAAAGCCTGGTATGTATTCACTTTAAGCAAAATATTCCATTTATAATATTTGACCATGTATGTCT
GEN1	GEN1_23	chr2	17961177	17961350	ACACTGACGACATGGTTCTACAaagcctgaccGATTGAATTTTTT	TACGGTAGCAGAGACTTGGTCTTGGTAAACAGCAACGATCTCAGG	174	32	aagcctgaccGATTGAATTTTTTTAAATGCCTAATTAAGGACACTTTGCTGTATTTTTAATCTTTTAGAACATTATGCTATGGAAGATAAACAACATGGAGAATTTGCTTTATTAACAATTGAGGAAGAATCATTGTTTGAAGCAGCATATCCTGAGATCGTTGCTGTTTACCA	One primer sits in the repeat region
GEN1	GEN1_24	chr2	17961257	17961447	ACACTGACGACATGGTTCTACATGGAAGATAAACAACATGGAGAATTTGC	TACGGTAGCAGAGACTTGGTCTAGGTGGCTCTTCTATAACATTTGC	191	34	TGGAAGATAAACAACATGGAGAATTTGCTTTATTAACAATTGAGGAAGAATCATTGTTTGAAGCAGCATATCCTGAGATCGTTGCTGTTTACCAAAAACAAAAGTTAGAAATTAAAGGGAAGAAACAAAAACGTAAGTTTTGGGTTTGATAGCTATTTATGCCACATGCAAATGTTATAGAAGAGCCACCT
GEN1	GEN1_25	chr2	17961818	17961967	ACACTGACGACATGGTTCTACATTTTTTATTTTTTACCCAAGTTAAAGCAAAG	TACGGTAGCAGAGACTTGGTCTTGTGGGTTTTAAAGTCATGTGTGA	150	28	TTTTTTATTTTTTACCCAAGTTAAAGCAAAGAAAATAAATGTTGATTATATGTATTTTTTTTCTTTTCAGGTATTAAGCCTAAAGAAAACAATTTGCCAGAACCAGATGAAGTAATGAGCTTTCAGTCACACATGACTTTAAAACCCACA
GEN1	GEN1_26	chr2	17961906	17962104	ACACTGACGACATGGTTCTACAACAATTTGCCAGAACCAGATGAA	TACGGTAGCAGAGACTTGGTCTTCTTGTGCATTCAAACATGGAGT	199	37	ACAATTTGCCAGAACCAGATGAAGTAATGAGCTTTCAGTCACACATGACTTTAAAACCCACATGTGAAATCTTTCATAAGCAGAATTCCAAGTTAAATTCGGGGATTTCCCCTGATCCTACATTACCACAGGAATCTATTTCTGCCTCATTGAATAGCTTGCTTTTACCTAAAAATACTCCATGTTTGAATGCACAAGA
GEN1	GEN1_27	chr2	17962013	17962203	ACACTGACGACATGGTTCTACATCCCCTGATCCTACATTACCACA	TACGGTAGCAGAGACTTGGTCTTGAGATGAGGTATTGGGTTGACT	191	38	TCCCCTGATCCTACATTACCACAGGAATCTATTTCTGCCTCATTGAATAGCTTGCTTTTACCTAAAAATACTCCATGTTTGAATGCACAAGAACAGTTCATGTCTTCTCTAAGACCTTTGGCTATACAGCAAATTAAAGCTGTCAGTAAGTCTCTAATTTCAGAATCTAGTCAACCCAATACCTCATCTCA
GEN1	GEN1_28	chr2	17962084	17962264	ACACTGACGACATGGTTCTACATCCATGTTTGAATGCACAAGAACAG	TACGGTAGCAGAGACTTGGTCTAAAAGAAGTACCTTCCCAGTCAA	181	38	TCCATGTTTGAATGCACAAGAACAGTTCATGTCTTCTCTAAGACCTTTGGCTATACAGCAAATTAAAGCTGTCAGTAAGTCTCTAATTTCAGAATCTAGTCAACCCAATACCTCATCTCATAATATATCCGTGATTGCTGATCTACACTTGAGCACTATTGACTGGGAAGGTACTTCTTTT
GEN1	GEN1_29	chr2	17962181	17962366	ACACTGACGACATGGTTCTACAAGTCAACCCAATACCTCATCTCA	TACGGTAGCAGAGACTTGGTCTTGGGATATTTTCAAAGCCATCAGG	186	37	AGTCAACCCAATACCTCATCTCATAATATATCCGTGATTGCTGATCTACACTTGAGCACTATTGACTGGGAAGGTACTTCTTTTAGTAATTCTCCAGCTATTCAAAGGAATACTTTTTCTCATGATTTAAAATCAGAAGTTGAATCAGAGCTATCAGCCATCCCTGATGGCTTTGAAAATATCCCA
GEN1	GEN1_30	chr2	17962265	17962449	ACACTGACGACATGGTTCTACAAGTAATTCTCCAGCTATTCAAAGGAA	TACGGTAGCAGAGACTTGGTCTTCAGGACTAATCCCATCAGAATCC	185	38	AGTAATTCTCCAGCTATTCAAAGGAATACTTTTTCTCATGATTTAAAATCAGAAGTTGAATCAGAGCTATCAGCCATCCCTGATGGCTTTGAAAATATCCCAGAACAACTGTCCTGTGAATCAGAAAGGTACACTGCAAACATAAAGAAAGTGTTGGATGAGGATTCTGATGGGATTAGTCCTGA
GEN1	GEN1_31	chr2	17962372	17962570	ACACTGACGACATGGTTCTACAACTGTCCTGTGAATCAGAAAGGT	TACGGTAGCAGAGACTTGGTCTAGTTTTCAGGTTGACATCTGGTTG	199	37	ACTGTCCTGTGAATCAGAAAGGTACACTGCAAACATAAAGAAAGTGTTGGATGAGGATTCTGATGGGATTAGTCCTGAAGAGCATCTACTTTCTGGCATTACTGATTTATGTCTTCAGGATTTGCCTTTAAAGGAACGAATATTTACAAAATTATCATATCCTCAGGATAATCTACAACCAGATGTCAACCTGAAAACT
GEN1	GEN1_32	chr2	17962426	17962624	ACACTGACGACATGGTTCTACAGGATTCTGATGGGATTAGTCCTG	TACGGTAGCAGAGACTTGGTCTACAATCAGAACCACTGTTAGCAA	199	35	GGATTCTGATGGGATTAGTCCTGAAGAGCATCTACTTTCTGGCATTACTGATTTATGTCTTCAGGATTTGCCTTTAAAGGAACGAATATTTACAAAATTATCATATCCTCAGGATAATCTACAACCAGATGTCAACCTGAAAACTTTGTCCATACTTAGTGTAAAAGAATCTTGTATTGCTAACAGTGGTTCTGATTGT
GEN1	GEN1_33	chr2	17962567	17962762	ACACTGACGACATGGTTCTACAAACTTTGTCCATACTTAGTGTAAAAGAAT	TACGGTAGCAGAGACTTGGTCTTGTGTTACTGACAGAATAAGGGACA	196	36	AACTTTGTCCATACTTAGTGTAAAAGAATCTTGTATTGCTAACAGTGGTTCTGATTGTACATCACATCTTTCAAAGGATCTTCCAGGAATTCCCTTGCAAAATGAATCCAGAGACTCTAAAATTCTAAAAGGAGACCAGCTGCTTCAAGAAGACTATAAAGTCAATACTTCTGTCCCTTATTCTGTCAGTAACACA
GEN1	GEN1_34	chr2	17962657	17962847	ACACTGACGACATGGTTCTACATCCCTTGCAAAATGAATCCAGAG	TACGGTAGCAGAGACTTGGTCTAAATTTTCCGAGTGGTTTGCAT	191	37	TCCCTTGCAAAATGAATCCAGAGACTCTAAAATTCTAAAAGGAGACCAGCTGCTTCAAGAAGACTATAAAGTCAATACTTCTGTCCCTTATTCTGTCAGTAACACAGTGGTAAAGACCTGCAATGTTAGACCACCAAATACTGCTTTAGATCATAGTAGAAAAGTTGATATGCAAACCACTCGGAAAATTT
GEN1	GEN1_35	chr2	17962772	17962959	ACACTGACGACATGGTTCTACAACCTGCAATGTTAGACCACCAAA	TACGGTAGCAGAGACTTGGTCTTGCTTTTGAGAACTGTGCTTCATT	188	39	ACCTGCAATGTTAGACCACCAAATACTGCTTTAGATCATAGTAGAAAAGTTGATATGCAAACCACTCGGAAAATTTTAATGAAGAAGAGTGTTTGCCTTGACAGACATTCCTCTGATGAACAAAGTGCCCCAGTGTTTGGGAAAGCTAAGTACACAACTCAAAGAATGAAGCACAGTTCTCAAAAGCA
GEN1	GEN1_36	chr2	17962900	17963085	ACACTGACGACATGGTTCTACACCCAGTGTTTGGGAAAGCTAAGT	TACGGTAGCAGAGACTTGGTCTTCTGGGAAACAGCTTTCTTCATT	186	38	CCCAGTGTTTGGGAAAGCTAAGTACACAACTCAAAGAATGAAGCACAGTTCTCAAAAGCATAATTCATCCCATTTCAAAGAAAGTGGCCATAACAAGTTGAGTAGCCCTAAGATACATATTAAAGAAACTGAACAGTGTGTCAGATCTTATGAAACAGCTGAAAATGAAGAAAGCTGTTTCCCAGA
GEN1	GEN1_37	chr2	17963029	17963207	ACACTGACGACATGGTTCTACATGAACAGTGTGTCAGATCTTATGAA	TACGGTAGCAGAGACTTGGTCTTTCAAGTGCTTTGGAATCTTAGTTTTA	179	37	TGAACAGTGTGTCAGATCTTATGAAACAGCTGAAAATGAAGAAAGCTGTTTCCCAGATTCAACAAAAAGTTCTCTGAGTTCTCTACAATGTCATAAGAAAGAAAACAACTCTGGTACTTGTTTGGATAGCCCTCTTCCTTTACGCCAGAGATTAAAACTAAGATTCCAAAGCACTTGAA
GEN1	GEN1_38	chr2	17963079	17963275	ACACTGACGACATGGTTCTACATCCCAGATTCAACAAAAAGTTCTCT	TACGGTAGCAGAGACTTGGTCTACCTTCCCTCTGTCTCTGCTATT	197	36	TCCCAGATTCAACAAAAAGTTCTCTGAGTTCTCTACAATGTCATAAGAAAGAAAACAACTCTGGTACTTGTTTGGATAGCCCTCTTCCTTTACGCCAGAGATTAAAACTAAGATTCCAAAGCACTTGAAATTTAAAACACTTAGGTATAACTTAACTATTTTAGTACTATCAGCAATAGCAGAGACAGAGGGAAGGT
MEN1	MEN1_1	chr11	64571736	64571919	ACACTGACGACATGGTTCTACACATGGGCTCAGAGTTGGG	TACGGTAGCAGAGACTTGGTCTGCCATCAAGCTGCAACTCAC	184	58	CATGGGCTCAGAGTTGGGGGACTAAGGGCGGAGCCTGGGTCCCCACAAGCGGTCCGAAGTCCCCAGTAGTTCAGAGGCCTTTGCGCTGCCGCTTGAGGAAAGACAGAGTGTAGTCACTAGGGGTGGACACTTTCTGCTTCTTCATCTGCACTTGCGACTGTGCCGTGAGTTGCAGCTTGATGGC
MEN1	MEN1_2	chr11	64571849	64572044	ACACTGACGACATGGTTCTACATCACTAGGGGTGGACACTTTCT	TACGGTAGCAGAGACTTGGTCTGCAGCACGGCTCAGGT	196	58	TCACTAGGGGTGGACACTTTCTGCTTCTTCATCTGCACTTGCGACTGTGCCGTGAGTTGCAGCTTGATGGCGCTCGAGTTGATCTTGGTGGCCACCAGCAGCTCCTTCATGCCCTTCATCTTCTCACTCTGGAAAGTGAGCACTGGACCCTCCGGCGGTGGTGATGCTGTGGGTGCTGGCACCTGAGCCGTGCTGC
MEN1	MEN1_3	chr11	64571998	64572185	ACACTGACGACATGGTTCTACACTCCGGCGGTGGTGATG	TACGGTAGCAGAGACTTGGTCTGGGAGTCCAAGCCAGAGGAG	188	71	CTCCGGCGGTGGTGATGCTGTGGGTGCTGGCACCTGAGCCGTGCTGCCACCTTCAGGGCCTCGGGCTGTGCCAGCGACAGTCCCAGGAGGCTTCCGGGGGGGTCCTGACACTGCACCCTGGCCGGTGCCCAGGCCCTTGTCCAGTGCTGGCTTCTTGGGCGGCGGGGGCTCCTCTGGCTTGGACTCCC
MEN1	MEN1_4	chr11	64572133	64572324	ACACTGACGACATGGTTCTACACTTGTCCAGTGCTGGCTTCTT	TACGGTAGCAGAGACTTGGTCTAACCTTGCTCTCACCTTGCTC	192	72	CTTGTCCAGTGCTGGCTTCTTGGGCGGCGGGGGCTCCTCTGGCTTGGACTCCCGCCGTGGGCCCCGCCGCCGGCCTTCCCGGGCTTCCTCGCCCCACGGCTCCTCGGCCTCGGCCGCCTCGGCCTCTCGGCTCACTATGCGCACCTTCTGCCGCACCTGGGCCAGTGGGGAGAGCAAGGTGAGAGCAAGGTT
MEN1	MEN1_5	chr11	64572427	64572624	ACACTGACGACATGGTTCTACACTGGGCCAGAAAAGTCTGACAAG	TACGGTAGCAGAGACTTGGTCTCCCACCTGCTGCGATTCTA	198	61	CTGGGCCAGAAAAGTCTGACAAGCCCGTGGCTGCTGTCACCACCTGTAGTGCCCAGACCTCTGTGCAGCTGTCCCTCACCTGTCCCTCAAAACGGCCTAGGGACTGCACAAGAAAGGTGGCCCAGCCCACATGCAGCACAGGCGTGGGACTGCCCTCCTCCCATTTGCAGATGCCGTCGTAGAATCGCAGCAGGTGGG
MEN1	MEN1_6	chr11	64572512	64572709	ACACTGACGACATGGTTCTACACTCAAAACGGCCTAGGGACTG	TACGGTAGCAGAGACTTGGTCTTAAGAGACTGATCTGTGCCCTCC	198	62	CTCAAAACGGCCTAGGGACTGCACAAGAAAGGTGGCCCAGCCCACATGCAGCACAGGCGTGGGACTGCCCTCCTCCCATTTGCAGATGCCGTCGTAGAATCGCAGCAGGTGGGCGAAGCACTCAGGGTCCTGGAGGGCGGAACCTTGGCTCTGGGTGCCCTGGACGAGGGGGAAGGGAGGGCACAGATCAGTCTCTTA
MEN1	MEN1_7	chr11	64573012	64573210	ACACTGACGACATGGTTCTACACATCCCTAATCCCGTACATGCAG	TACGGTAGCAGAGACTTGGTCTACAAGGAGTTCTTTGAAGTAGCC	199	62	CATCCCTAATCCCGTACATGCAGCCCCCATGGCCTGTGGAAGGGAGCCCTGTCCAGGTGGGAGGCTGGACACAGGCTGGAGCTCCAGCCTTTCACCTGGCTTTGCTCCCCCGGCCGCTCCTCGCCCGCCTCCAGCAAGCTGGCTGCCTCCTTCAGCAGGTTGGGGATGACATCATTGGCTACTTCAAAGAACTCCTTGT
MEN1	MEN1_8	chr11	64573096	64573278	ACACTGACGACATGGTTCTACACAGCCTTTCACCTGGCTTTG	TACGGTAGCAGAGACTTGGTCTCCTTCAGACCCTACAGAGACCC	183	58	CAGCCTTTCACCTGGCTTTGCTCCCCCGGCCGCTCCTCGCCCGCCTCCAGCAAGCTGGCTGCCTCCTTCAGCAGGTTGGGGATGACATCATTGGCTACTTCAAAGAACTCCTTGTAGATCTCCTCGTCTTCCCGGCAGTAGTTGTAGCTGTGAGAGCAGTGGGGTCTCTGTAGGGTCTGAAGG
MEN1	MEN1_9	chr11	64573648	64573828	ACACTGACGACATGGTTCTACAAAACTGATGGAGGGGAAGAAAGG	TACGGTAGCAGAGACTTGGTCTGCCAAGACCTACTATCGGGATGA	181	59	AAACTGATGGAGGGGAAGAAAGGACAGGCTGCAGGCCCTAGTAGGGGGATCCTCACTCCTGGATGACAGTGGCCGTGTCCGCCCAGGCCTGCAGGGCTTCCCGCACATTGCGGTTGCGACAGTGGTAGCCAGCCAGGTACATGTAGGGGTAGATGTGTTCATCCCGATAGTAGGTCTTGGC
MEN1	MEN1_10	chr11	64573757	64573954	ACACTGACGACATGGTTCTACAGCGGTTGCGACAGTGGTAG	TACGGTAGCAGAGACTTGGTCTGGACTCCCTGGGATCTTCCT	198	62	GCGGTTGCGACAGTGGTAGCCAGCCAGGTACATGTAGGGGTAGATGTGTTCATCCCGATAGTAGGTCTTGGCTGAGGCAATGCCCTGGATGGAGGTGAGGCAGAGGATCCTCAGGGAGGCAGCCCCAGCTGCCCTGCTGGCACAAATGCCCCACCAGGGCACACCCAGAAGGGGCCACAGGAAGATCCCAGGGAGTCC
MEN1	MEN1_11	chr11	64574432	64574602	ACACTGACGACATGGTTCTACACCTCAGCCACTGTTAGGGTC	TACGGTAGCAGAGACTTGGTCTGGGTGGCAGCCTGAATTATGA	171	60	CCTCAGCCACTGTTAGGGTCTCCCTTCTGCACCCTCCTTAGATGCCCCCACCTTGTGGTAGAGGGTGAGTGGGTCTGGCCGGCCAGGGGTGGGCTCCAGCTCCTCTAGATCTGCCAGGTTCCCTAAGGCCATGGGGTACCTAGGAAAGGATCATAATTCAGGCTGCCACCC
MEN1	MEN1_12	chr11	64574534	64574723	ACACTGACGACATGGTTCTACACTCTAGATCTGCCAGGTTCCCTA	TACGGTAGCAGAGACTTGGTCTCGTGGCTCATAACTCTCTCCTTC	190	58	CTCTAGATCTGCCAGGTTCCCTAAGGCCATGGGGTACCTAGGAAAGGATCATAATTCAGGCTGCCACCCAGCCCCCCGGCCTCACCAGGCGCAGCCTGGCCACTTCCCTCTACTGACCTTTCCAGATGTCCCAGGTCATAGAGCAGCCAGAGCAGCTTCTAGGAGCCGAAGGAGAGAGTTATGAGCCACG
MEN1	MEN1_13	chr11	64574964	64575156	ACACTGACGACATGGTTCTACAGGTCCCACAGCAAGTCAAGT	TACGGTAGCAGAGACTTGGTCTTAAGAGCTGGCTGTACCTGAAAG	193	58	ggtcccacagcaagtcaagtctggcctagcccagtcctgccccattggctcagccctcacctgctgcagctgcAGAAGCTCCAGCGAGTCGGTGTGCAGGTCAATGGAAGGGTTGATGGCACACACCATGAACGCCACCTCCATCTTGCGGTCACAGCGCATGTATGATCCTTTCAGGTACAGCCAGCTCTTA	One primer sits in the repeat region
MEN1	MEN1_14	chr11	64575059	64575253	ACACTGACGACATGGTTCTACAGCAGGTCAATGGAAGGGTTGATG	TACGGTAGCAGAGACTTGGTCTTAGGAAGGGAAGACAGAAGAGCC	195	54	GCAGGTCAATGGAAGGGTTGATGGCACACACCATGAACGCCACCTCCATCTTGCGGTCACAGCGCATGTATGATCCTTTCAGGTACAGCCAGCTCTTAGGGGGGGATGAGATCATTATGTCTCATGATGGCCCACCCTGTGCCTGCTTCAGGGAATGACAGCCAGGAAAAGGGGCTCTTCTGTCTTCCCTTCCTA
MEN1	MEN1_15	chr11	64575304	64575495	ACACTGACGACATGGTTCTACATTGGGTGGCTTGGGCTACTAC	TACGGTAGCAGAGACTTGGTCTCCTCGCCCTGTCTGAGGAT	192	62	TTGGGTGGCTTGGGCTACTACAGTATGAAGGGGACAAGGCTGGGGGGAGGGAACAATACCCGCTCAGCCACACCGGCATTGACTGTCTGGCCCCTGCGGTCCTCGTTGCCCTTGCCGTGCCAGGTGACCTCAGCTGTCTGCTCCCCATTGGGCCCAAACACTACCCAGGCATGATCCTCAGACAGGGCGAGG
MEN1	MEN1_16	chr11	64575402	64575600	ACACTGACGACATGGTTCTACAGTCCTCGTTGCCCTTGCC	TACGGTAGCAGAGACTTGGTCTCCCTCTTTCATTACCTCCCCCTT	199	62	GTCCTCGTTGCCCTTGCCGTGCCAGGTGACCTCAGCTGTCTGCTCCCCATTGGGCCCAAACACTACCCAGGCATGATCCTCAGACAGGGCGAGGTGGACATCCCGGAGACCCAGGGCCTGGCAGGCCCCAACCACAGCAAAGGCCACACCGGAGCTGTCCAATTTGGTGCCTGTGGAAGGGGGAGGTAATGAAAGAGGG
MEN1	MEN1_17	chr11	64577066	64577238	ACACTGACGACATGGTTCTACAGGGTTCTGTAAACCATGGAGGG	TACGGTAGCAGAGACTTGGTCTGTGAGCTGGTGAAGAAGGTCTC	173	53	GGGTTCTGTAAACCATGGAGGGTTTTGAAGAAGTGGGTCATGGATAAGATTCCCACCTACTGGGCTCCAACCTGTGATGAAGCTGAAGAGGGACTGGATGTGGGCCCGATCCTTGAAGTAGGAGCGGCTGAGGCTGTTCCATATGACATCGGAGACCTTCTTCACCAGCTCAC
MEN1	MEN1_18	chr11	64577127	64577325	ACACTGACGACATGGTTCTACAGGGCTCCAACCTGTGATGAA	TACGGTAGCAGAGACTTGGTCTTCGCCGCCCTCTATGC	199	61	GGGCTCCAACCTGTGATGAAGCTGAAGAGGGACTGGATGTGGGCCCGATCCTTGAAGTAGGAGCGGCTGAGGCTGTTCCATATGACATCGGAGACCTTCTTCACCAGCTCACGGCTGGAGACACCCCCTTCTCGAGGATAGAGGGACAGGTCGACGGCGCCTCGGATCTGGGCGGTGAAGCGGGCATAGAGGGCGGCGA
MEN1	MEN1_19	chr11	64577254	64577452	ACACTGACGACATGGTTCTACACTTCTCGAGGATAGAGGGACAGG	TACGGTAGCAGAGACTTGGTCTGTGGAGCATTTTCTGGCTGTCAA	199	65	CTTCTCGAGGATAGAGGGACAGGTCGACGGCGCCTCGGATCTGGGCGGTGAAGCGGGCATAGAGGGCGGCGATGATAGACAGGTCGGCCACGGGAAAGTAGGTGAGGCCGCCAGGCGGGTCGGGGGCGGGGCTGGGCTGGAAGGTGAGCTCGGGAACGTTGGTAGGGATGACGCGGTTGACAGCCAGAAAATGCTCCAC
MEN1	MEN1_20	chr11	64577405	64577575	ACACTGACGACATGGTTCTACAGGGAACGTTGGTAGGGATGAC	TACGGTAGCAGAGACTTGGTCTCTGAAGGCCGCCCAGAAGA	171	64	GGGAACGTTGGTAGGGATGACGCGGTTGACAGCCAGAAAATGCTCCACGAAGCCCAGCACCAAGGAAAGGAGCACCAGGTCCGGCTCCTCTCGGCCCAGCTCGGCAGCAAACAGGCGCACCACGTCGTCGATGGAGCGCAGCGGGAACAGCGTCTTCTGGGCGGCCTTCAG
MEN1	MEN1_21	chr11	64577450	64577644	ACACTGACGACATGGTTCTACACACGAAGCCCAGCACCAA	TACGGTAGCAGAGACTTGGTCTCGAACCTGCCCGACCC	195	71	CACGAAGCCCAGCACCAAGGAAAGGAGCACCAGGTCCGGCTCCTCTCGGCCCAGCTCGGCAGCAAACAGGCGCACCACGTCGTCGATGGAGCGCAGCGGGAACAGCGTCTTCTGGGCGGCCTTCAGCCCCATGGCGGCGGGCGGTGGGCGGCGGCCTGCAAGGCAAGCCGGGGGAGGGAGGGTCGGGCAGGTTCG
MRE11A	MRE11A_1	chr11	94153232	94153422	ACACTGACGACATGGTTCTACAAGCTTGTAACATTTTCATTTTTCCTGT	TACGGTAGCAGAGACTTGGTCTTGCCCATAAGAACTTCTGTCTTGTT	191	32	AGCTTGTAACATTTTCATTTTTCCTGTATCTTGCATGTTTCTCAGTGCCATTAAATATATTATCTTCTATTTCTTCTTAAAGAACTAGTGTTCATAAAAGGATCATCATCATCATCCTGAAATGAGATACAAATGTTGTATTAGTGATTGTTCCCTGCTTCACTGAAACAAGACAGAAGTTCTTATGGGCA
MRE11A	MRE11A_2	chr11	94163000	94163184	ACACTGACGACATGGTTCTACAAGCAACTAGCTGGCAGTCTCTAT	TACGGTAGCAGAGACTTGGTCTTTGTGTTTGTTTTTGTTTTTGTTTTGC	185	32	AGCAACTAGCTGGCAGTCTCtatttaaattttataaagttaaaaattaattaaaatttaacaatattacttatttaCCTCACTTGATTCAAAATCAACCCCTTTCGATACTTGACTCTGGGACATGATTTTGCTGGATGATGTGCTGGACCACCTGAGGCaaaacaaaaacaaaaacaaacacaa	Two primers sits in the repeat region
MRE11A	MRE11A_3	chr11	94168911	94169093	ACACTGACGACATGGTTCTACATGGCATAGAAAAATGTGTAACTTTGGA	TACGGTAGCAGAGACTTGGTCTACTGTTTGTTGCTTTGTTTCCTT	183	35	TGGCATAGAAAAATGTGTAACTTTGGAATTCTGGATAATTTTTAATTTTTTTCAGATGTTTCTTTTGCAGAAAATCACTGCACCTACCTTTGATCTGTCTTTGAAGTGGTAGGAAAAATGTCTTCTTCCACATCTGATTCATCTACCTCAATCACCTGGCAAGGAAACAAAGCAACAAACAGT
MRE11A	MRE11A_4	chr11	94170278	94170475	ACACTGACGACATGGTTCTACAGTTGACAATTCATAATGCAGAAAACATAA	TACGGTAGCAGAGACTTGGTCTGCTAAAGAAGTATGCAAGTTTTTCTAAGT	198	29	GTTGACAATTCATAATGCAGAAAACATAAATTATTAATACACAACCATAAAACTTTTTTTCTTACCTCTGAATAATTCTTAGTAGTGACATTTCGGGAAGGCTGCTGTCTTGTAGATTTAAAGGCTAGAATGAAAAAGATGAAATGTGCATTATGTTATTCTTAAAATAACTTAGAAAAACTTGCATACTTCTTTAGC
MRE11A	MRE11A_5	chr11	94178910	94179103	ACACTGACGACATGGTTCTACAAATGGTGATTACCTTGGTCTTTCT	TACGGTAGCAGAGACTTGGTCTAGCTGCTGATAGGCTTGTACATT	194	39	AATGGTGATTACCTTGGTCTTTCTAATGTTGGAATTTATAAATAATCACTTGCAGTCTATACTCACCATCTATAATAGACATATTTCTAGATGCTGACACAGCAGTCTTTGAGTTCCTGCTACGGGTAGAAGTCTCCAGACCAGTGTCTGCTGTTAGAAAAATGAACAGTCAATGTACAAGCCTATCAGCAGCT
MRE11A	MRE11A_6	chr11	94180327	94180517	ACACTGACGACATGGTTCTACATGTATTTTCCACTCAACTGCCAA	TACGGTAGCAGAGACTTGGTCTGCAGAACAGATGGCTAATGACTCT	191	50	TGTATTTTCCACTCAACTGCCAAGTGTGAATGTGCACAGGACTGAACTCAGTGCTCACCTCTTCCTCTTTGAGACCCTCCTCTCGATGCTGAATTCTGCCCTCTTCCACCTCTTCGACCTCTTCCTCGGCCTCTTCCTTTGTTGGTTGCTGCTGAGATGCTATCATCAGAGTCATTAGCCATCTGTTCTGC
MRE11A	MRE11A_7	chr11	94180463	94180655	ACACTGACGACATGGTTCTACACTTTGTTGGTTGCTGCTGAGATG	TACGGTAGCAGAGACTTGGTCTGGATGGTACGTTATCTCATTGTGTG	193	46	CTTTGTTGGTTGCTGCTGAGATGCTATCATCAGAGTCATTAGCCATCTGTTCTGCTAAATCTATACTCATAAGGTCATCAGCACTAAAGGCAGAAGCAGACTCCTCTGACTGAGATCTGAGTGCTCTGGCCCTGGTCATAGCCTAAGAGGGAGAAGAAGGAGAAAGTACACACAATGAGATAACGTACCATCC
MRE11A	MRE11A_8	chr11	94189341	94189519	ACACTGACGACATGGTTCTACAATCCCCTAGACCTATGGACTGAC	TACGGTAGCAGAGACTTGGTCTTCTGTTATGATCTAGGTACGTCGTTT	179	35	ATCCCCTAGACCTATGGACTGACTATTCTAACTAAACCTACTGGTTATTCTAGTTTAAGAAAGTGATATATAAACACAAGAATTTGCAGCAGAATAATTACCTCACGGACTTCATCATCTTCTTCATTAGTATTTTTTTGTCTGGTTTCTCTGAAACGACGTACCTAGATCATAACAGA
MRE11A	MRE11A_9	chr11	94189440	94189632	ACACTGACGACATGGTTCTACAACCTCACGGACTTCATCATCTTC	TACGGTAGCAGAGACTTGGTCTACTTTTGTGAGACATTGTTAAATTTGC	193	32	ACCTCACGGACTTCATCATCTTCTTCATTAGTATTTTTTTGTCTGGTTTCTCTGAAACGACGTACCTAGATCATAACAGAGTAAATCACAAACATGTTGCCTATTCCAGTTATGTAAATATAAAACAAGGGGCTACAATTAAGAAATGCTTTATGTTATAAAACTTGCAAATTTAACAATGTCTCACAAAAGT
MRE11A	MRE11A_10	chr11	94192477	94192673	ACACTGACGACATGGTTCTACAAGAGAGGTTAAATAGTGATTTACCAGAA	TACGGTAGCAGAGACTTGGTCTAGATGCCATTGAGGAATTAGTGA	197	35	agagaggttaaatagtgatttaccagaaaaaaatctcagagctaCTCTTAAAGACAGACTATTTAAATAGACCTAGACACTCAAATTAGTTACTTACCTCCTCATCGATTTTGTCTTCGAGGGCATCAATATGACGTTCTTTAAGAAATCGCTGTGTTTTTTCCAACTGGTATTTCACTAATTCCTCAATGGCATCT	One primer sits in the repeat region
MRE11A	MRE11A_11	chr11	94192568	94192756	ACACTGACGACATGGTTCTACAACTTACCTCCTCATCGATTTTGTCT	TACGGTAGCAGAGACTTGGTCTATCTTACAGAATGTGCAGCTCTC	189	41	ACTTACCTCCTCATCGATTTTGTCTTCGAGGGCATCAATATGACGTTCTTTAAGAAATCGCTGTGTTTTTTCCAACTGGTATTTCACTAATTCCTCAATGGCATCTTTCTCCTCCTTGTCCACAAATTCTTGTACTGCTTCACCCATCCCTCTTTCTGTTAGCAGTGAGAGCTGCACATTCTGTAAGAT
MRE11A	MRE11A_12	chr11	94192665	94192862	ACACTGACGACATGGTTCTACAATGGCATCTTTCTCCTCCTTGTC	TACGGTAGCAGAGACTTGGTCTAGCTGTTCACTATATTTTTTCTCTGGT	198	36	ATGGCATCTTTCTCCTCCTTGTCCACAAATTCTTGTACTGCTTCACCCATCCCTCTTTCTGTTAGCAGTGAGAGCTGCACATTCTGTAAGATACAAATCACTGGATGCAGAAATAGTTTTTATTCCTTACAAAATAATTATAGATGAGCAAGGAAAATTACCAAATATGTTACCAGAGAAAAAATATAGTGAACAGCT
MRE11A	MRE11A_13	chr11	94194042	94194212	ACACTGACGACATGGTTCTACAAAATTAAAATCTGTTACTATAAGGTAGCCATTATTC	TACGGTAGCAGAGACTTGGTCTTTTTTTCTAGGAGAAGAGATCAACTTTGG	171	33	AAATTAAAATCTGTTACTATAAGGTAGCCATTATTCAAAATGTGAACTGTAAGAAATTACCTTCTCTGCGGTTTGAAAGTACTGTTTTACAAGATCTTCTACCCTTAAAGTTGTTCCTTCTGAAGGCTTTGTGATAAGTTTCCCAAAGTTGATCTCTTCTCCTAGAAAAAA
MRE11A	MRE11A_14	chr11	94194100	94194292	ACACTGACGACATGGTTCTACAACCTTCTCTGCGGTTTGAAAGTA	TACGGTAGCAGAGACTTGGTCTCCTTACCTTCTCCACTGACAACT	193	35	ACCTTCTCTGCGGTTTGAAAGTACTGTTTTACAAGATCTTCTACCCTTAAAGTTGTTCCTTCTGAAGGCTTTGTGATAAGTTTCCCAAAGTTGATCTCTTCTCCTAGAAAAAAAGAAGTATATCAAAAAATAGCTTCTATCATAATGTTAAAATGTGCATACTCATTGCAAGTTGTCAGTGGAGAAGGTAAGG
MRE11A	MRE11A_15	chr11	94197208	94197386	ACACTGACGACATGGTTCTACAAGTTTTTAATAAAGATTCCTTCACAAATCCTA	TACGGTAGCAGAGACTTGGTCTTTGAACCTTTCAGTGTTCTTCGC	179	32	AGTTTTTAATAAAGATTCCTTCACAAATCCTATAAGAACATTTTTTTACCTCATAAAAATAACTAGCTTACCTGTTTTTTCCTTTTGTTCTCTATGCCTGAAAAAATGGATAATGTCTTTTGGATTAGCTACCCGATCCACAAATTTCTGGCTAAAGCGAAGAACACTGAAAGGTTCAA
MRE11A	MRE11A_16	chr11	94197272	94197451	ACACTGACGACATGGTTCTACAAGCTTACCTGTTTTTTCCTTTTGT	TACGGTAGCAGAGACTTGGTCTGCAAATTGTTGTTTCCTAGCGTTC	180	38	AGCTTACCTGTTTTTTCCTTTTGTTCTCTATGCCTGAAAAAATGGATAATGTCTTTTGGATTAGCTACCCGATCCACAAATTTCTGGCTAAAGCGAAGAACACTGAAAGGTTCAAAACCTCCACTATAGTCCACCTGAAAACACAGAATAATCTATGAACGCTAGGAAACAACAATTTGC
MRE11A	MRE11A_17	chr11	94200851	94201029	ACACTGACGACATGGTTCTACACTCCGATGGTGATTGCTCTTCTT	TACGGTAGCAGAGACTTGGTCTGAACGTCTGGGTAATTCTCACCA	179	37	CTCCGATGGTGATTGCTCTTCTTATTACTATGAGCACTCTCCTCACTACTTTTCAAAGAAACCATGTAAACTGTACATTACTATGCTTTGAAAATTAATAATATTCAATCTATATAAATAGGACTTACTCGCAGTCGTACAAGAGGCTTCTCTGGCTGGTGAGAATTACCCAGACGTTC
MRE11A	MRE11A_18	chr11	94200969	94201146	ACACTGACGACATGGTTCTACATAGGACTTACTCGCAGTCGTACA	TACGGTAGCAGAGACTTGGTCTGGAAAATTCCTGTGGTAATAAGCTG	178	38	TAGGACTTACTCGCAGTCGTACAAGAGGCTTCTCTGGCTGGTGAGAATTACCCAGACGTTCCCGTTCAGCATTTTCAAGCATTTCTTCAATCTCAAAATTTTTAAAAAGATTAAAAAACAACGTAGTAAACTGAGTTTAACTTGGCTGAATAGCAGCTTATTACCACAGGAATTTTCC
MRE11A	MRE11A_19	chr11	94203540	94203718	ACACTGACGACATGGTTCTACAACATAAAGGCTTCCCTCTACTCT	TACGGTAGCAGAGACTTGGTCTTGTTCTAGCTAATCATCCAGACATTTT	179	32	ACATAAAGGCTTCCCTCTACTCTATTAAATTACTTAATTGAAGGTGAATAATTCTTCAACTAAAGTAGATCTCATTGACTTTATCAAAAAGAATTACCTTCTCCAAACAGAAGCTTTGTATGGCTTGGGTTACTTTAGGATTATCTGGGTTAAAAATGTCTGGATGATTAGCTAGAACA
MRE11A	MRE11A_20	chr11	94203656	94203836	ACACTGACGACATGGTTCTACATGTATGGCTTGGGTTACTTTAGGA	TACGGTAGCAGAGACTTGGTCTACTCGGTGTTCATTTCTCTCCAC	181	40	TGTATGGCTTGGGTTACTTTAGGATTATCTGGGTTAAAAATGTCTGGATGATTAGCTAGAACAATATCCTCCATGAAAAACTGCCGCACTGTGTGAAGAGGAATTTTATGCATATTCATCTTCCTCCCTTTAATACGCAGCAAACCAACATGTCTGAAGTGGAGAGAAATGAACACCGAGT
MRE11A	MRE11A_21	chr11	94204663	94204856	ACACTGACGACATGGTTCTACAAGGCCTTAAACCTATGAGATGATTAGT	TACGGTAGCAGAGACTTGGTCTGGGCCATGAACATGAGTGTAAAA	194	37	AGGCCTTAAACCTATGAGATGATTAGTTATTATAGCAAAGATTTCTTAAAAATTGGCTCAAAATATATAACACTCACTTCTTTACAGCTTCTCCTGGGGAAAGAGAAGTAACCACTGAGCTTCCAGGTTGTGAGATATAAAACAGCTGTTGTTCATTTTTGGTTGGAGCTATTTTACACTCATGTTCATGGCCC
MRE11A	MRE11A_22	chr11	94204755	94204934	ACACTGACGACATGGTTCTACACCTGGGGAAAGAGAAGTAACCAC	TACGGTAGCAGAGACTTGGTCTTTGATACAGGAGTAAACATGGAAGT	180	39	CCTGGGGAAAGAGAAGTAACCACTGAGCTTCCAGGTTGTGAGATATAAAACAGCTGTTGTTCATTTTTGGTTGGAGCTATTTTACACTCATGTTCATGGCCCCAGATAACAAGATCAATGAAGTCATCCAAAAATTGTTCTGGAATGAAGTTAGTACTTCCATGTTTACTCCTGTATCAA
MRE11A	MRE11A_23	chr11	94204851	94205049	ACACTGACGACATGGTTCTACATGGCCCCAGATAACAAGATCAAT	TACGGTAGCAGAGACTTGGTCTTTTCTGGTACATAGAAGGATGCAA	199	31	TGGCCCCAGATAACAAGATCAATGAAGTCATCCAAAAATTGTTCTGGAATGAAGTTAGTACTTCCATGTTTACTCCTGTATCAAGATTTTGAAAAATATAAATTCGGTGATTAGAAAAATTTCATATTATTGAAGTCTATACAGATCTTTCtttctccattcactaaagattttattgcatccttctatgtaccagaaa	One primer sits in the repeat region
MRE11A	MRE11A_24	chr11	94209396	94209581	ACACTGACGACATGGTTCTACAAGAAACAGATTTGGGAAGCCTCA	TACGGTAGCAGAGACTTGGTCTTGTCCATTTCAGGATCCATTCCA	186	37	AGAAACAGATTTGGGAAGCCTCAGCACTTGGCTCAAACTTTTTCAGAGAAAAGTTTTACCTGTTCTGATGAATCACAAATAAGTTAAACCAAGAGTTCTCATCTTCCTTTGGTCTCAACATTGTTACTTTTTTATTGACAAACATTCGATAGAGCCTTTCATCTGGAATGGATCCTGAAATGGACA
MRE11A	MRE11A_25	chr11	94209490	94209684	ACACTGACGACATGGTTCTACAGTTCTCATCTTCCTTTGGTCTCA	TACGGTAGCAGAGACTTGGTCTtctcCCAACAGTAAAGTGAAATACT	195	31	GTTCTCATCTTCCTTTGGTCTCAACATTGTTACTTTTTTATTGACAAACATTCGATAGAGCCTTTCATCTGGAATGGATCCTGAAATGGACATTACATTATTTTTAAATTGTTTTCTTACTTCGGCTTAAAAAATGAATCTATTTTGCTTCTAAATTATGTCCTTCTCAAAGTATTTCACTTTACTGTTGGgaga	One primer sits in the repeat region
MRE11A	MRE11A_26	chr11	94211826	94212023	ACACTGACGACATGGTTCTACACAAACTTATCTCCAAATTTCTCAATTGTT	TACGGTAGCAGAGACTTGGTCTTGGACATTTTAAGTTGTGCTGGA	198	34	CAAACTTATCTCCAAATTTCTCAATTGTTTAAAGAATCACACATGGACATAAACAGTAAAATAAAACTGTCTTACCTAAACCATATAGCGCAATCTTTGTGCTTCCTTTTTGAAGCAAAACCGGACTAATGTCTATCTTCTCCACAGACATTGAACGTCCAAAGTGATTTACAAATCCAGCACAACTTAAAATGTCCA
MRE11A	MRE11A_27	chr11	94211910	94212107	ACACTGACGACATGGTTCTACAATAGCGCAATCTTTGTGCTTCCT	TACGGTAGCAGAGACTTGGTCTACGATATTCATGCAGATACCTACTTT	198	37	ATAGCGCAATCTTTGTGCTTCCTTTTTGAAGCAAAACCGGACTAATGTCTATCTTCTCCACAGACATTGAACGTCCAAAGTGATTTACAAATCCAGCACAACTTAAAATGTCCAAGGCACAAAGTGCATCTGCCTATGCAAAATAATTTCAAAGAATGTTAGTGTGTATGTAAAAGTAGGTATCTGCATGAATATCGT
MRE11A	MRE11A_28	chr11	94212747	94212929	ACACTGACGACATGGTTCTACAACACAATGAGAAAAAGGGAAGGC	TACGGTAGCAGAGACTTGGTCTAGGTTTCCATGGGTGAACTATCAA	183	38	ACACAATGAGAAAAAGGGAAGGCATGCTTTCCACAGACAAACTAAACTGATCATTTCCAAAATTCCAACAAACTCTAAGAAAACAATAATTACCCCTGTGGGATCGTCATGATTGCCATGAATACTAAACACTGGAATTGAAATGTTGAGGTTGCCATCTTGATAGTTCACCCATGGAAACCT
MRE11A	MRE11A_29	chr11	94212832	94213026	ACACTGACGACATGGTTCTACAATAATTACCCCTGTGGGATCGTC	TACGGTAGCAGAGACTTGGTCTTGCAGTTTGCCTATGATTGCATTA	195	36	ATAATTACCCCTGTGGGATCGTCATGATTGCCATGAATACTAAACACTGGAATTGAAATGTTGAGGTTGCCATCTTGATAGTTCACCCATGGAAACCTTAAAAAAAAAAAGTTACTTAAAATTTCCATACGGGACAAAAGCTGTTTTCCCTAAGATTCTCCTCCAAAATATTAATGCAATCATAGGCAAACTGCA
MRE11A	MRE11A_30	chr11	94219005	94219193	ACACTGACGACATGGTTCTACAGGCAAAACAGTTGTGTGTTTACG	TACGGTAGCAGAGACTTGGTCTACATTACATACCTGCCTCGAGTT	189	35	GGCAAAACAGTTGTGTGTTTACGTGTCTTATACAGCAAATACCATACACAAGTAATCACTCACTCAAGTAAATAAATATACTTACTTACTAAAACCAAAGTTGACTGACTGATCACTGAGAATTTCAAACTGGACAGGCCGATCACCCATACAATATTTTCTTAATAACTCGAGGCAGGTATGTAATGT
MRE11A	MRE11A_31	chr11	94219115	94219285	ACACTGACGACATGGTTCTACAGATCACTGAGAATTTCAAACTGGACA	TACGGTAGCAGAGACTTGGTCTACATACTAATTTTAACACCTTTTTCTGTTG	171	35	GATCACTGAGAATTTCAAACTGGACAGGCCGATCACCCATACAATATTTTCTTAATAACTCGAGGCAGGTATGTAATGTTTTCCTTGAGGGCTTATTTTCATGAAAAAGATCACCACCTAACAAAATAAAATCCACCTGATCAACAGAAAAAGGTGTTAAAATTAGTATGT
MRE11A	MRE11A_32	chr11	94223899	94224097	ACACTGACGACATGGTTCTACAGCACCTGAGCTTATAAAACAAATCT	TACGGTAGCAGAGACTTGGTCTACAGATATTCATCTTGGATTTATGGAGAA	199	35	GCACCTGAGCTTATAAAACAAATCTCTAACTTTAGAAGGAAAAATAACTTGTTAACCAAGGGAATATGGTAGATAGTGCACAAATACAAACCACACTCACTTCATTTTCCTGGGCAAGTCTTAAAATTTCATCGAGTGTTACAAACGTATCATTTCCTCTGACTGCATCTTTCTCCATAAATCCAAGATGAATATCTGT
MRE11A	MRE11A_33	chr11	94224009	94224206	ACACTGACGACATGGTTCTACATGGGCAAGTCTTAAAATTTCATCG	TACGGTAGCAGAGACTTGGTCTAGTTTGTCTCAATTTGTTTGAATATCCT	198	28	TGGGCAAGTCTTAAAATTTCATCGAGTGTTACAAACGTATCATTTCCTCTGACTGCATCTTTCTCCATAAATCCAAGATGAATATCTGTTGCAACTAATATTTTAAATGTGTTTTCATCATCACTATATTAAGAAAGAAGAAACATTTCAATATATTAATAATTCATTAAAGGATATTCAAACAAATTGAGACAAACT
MRE11A	MRE11A_34	chr11	94225890	94226060	ACACTGACGACATGGTTCTACACAGTTGACGAGCTTTAGAAACCC	TACGGTAGCAGAGACTTGGTCTTTGGAATCGAGTGCATTTTCTGAC	171	46	CAGTTGACGAGCTTTAGAAACCCCAAATAACAAGGGATTCCAGAAGTCAGGTGCTTACAGTGCATCTGCAGTACTCATTTTTATGGTCAGTCAAGCTCCTCTGGGACCAGGTTCTTCTCCAAGAACCCCTGGGTACTGTACTCAAATGTCAGAAAATGCACTCGATTCCAA
MUTYH	MUTYH_1	chr1	45794920	45795118	ACACTGACGACATGGTTCTACACAAAAATAAGCACTTTACTAACAACAGG	TACGGTAGCAGAGACTTGGTCTTTTTCACAGGGTTCCAAAAGGTC	199	51	CAAAAATAAGCACTTTACTAACAACAGGATTCTCAGGGAATGGGGGCTTTCAGAGGTGTCACTGGGCTGCACTGTTGAGGCTGTGTGCATCAGTGGAGATGTGAGACCGAAAGAAATTATCCAGGACTTGCTGGCCCATGCGGGGCTTTTTCCGACTGCACGGAGAGGACACCTGGGACCTTTTGGAACCCTGTGAAAA
MUTYH	MUTYH_2	chr1	45795002	45795189	ACACTGACGACATGGTTCTACAGTGTGCATCAGTGGAGATGTGAG	TACGGTAGCAGAGACTTGGTCTAAAGGGAGAGAGGACAAGGAGA	188	54	GTGTGCATCAGTGGAGATGTGAGACCGAAAGAAATTATCCAGGACTTGCTGGCCCATGCGGGGCTTTTTCCGACTGCACGGAGAGGACACCTGGGACCTTTTGGAACCCTGTGAAAAAATGGAAGGAGGGAGGCCTTGTAGTTGGGGGAGGGGGAGCAGAGAATCCTCTCCTTGTCCTCTCTCCCTTT
MUTYH	MUTYH_3	chr1	45796123	45796311	ACACTGACGACATGGTTCTACAACTGACTAAAAACCTATGGACTCAGG	TACGGTAGCAGAGACTTGGTCTGGGACATGAAGTTAAGGGCAGAA	189	52	ACTGACTAAAAACCTATGGACTCAGGCCTGGGGAGACACGGTTGGGAGAGGCCTAGGAGACTTACCATACAGGTCCCTGGCTGTTGGCCCTGATACACACGGAAAACCTAGACAAGAAGACAGGGAGGTGAGGGCTGGCACTTTTTGCAAAAGAGATAAACCGGTGTTCTGCCCTTAACTTCATGTCCC
MUTYH	MUTYH_4	chr1	45796797	45796969	ACACTGACGACATGGTTCTACATCATGTAGAACATGTAGGAAACACAAG	TACGGTAGCAGAGACTTGGTCTAAGTATATGGGCTGGCCTTGGAA	173	51	TCATGTAGAACATGTAGGAAACACAAGGAAGTACAACAAAGACAACAAAGGTAGTGCCTTTTTCATGGCGGTGGAAACAGCTGCGGTGTGAAATTCCTCCTGCGTCAGCCAGCGAGCACCTGGTGGTACGGTGGTCACTGGGGTCTGCCCTTCCAAGGCCAGCCCATATACTT
MUTYH	MUTYH_5	chr1	45796855	45797034	ACACTGACGACATGGTTCTACATTTTTCATGGCGGTGGAAACAG	TACGGTAGCAGAGACTTGGTCTTATTTGAACCCCTTGACCCTTCC	180	54	TTTTTCATGGCGGTGGAAACAGCTGCGGTGTGAAATTCCTCCTGCGTCAGCCAGCGAGCACCTGGTGGTACGGTGGTCACTGGGGTCTGCCCTTCCAAGGCCAGCCCATATACTTGATATGTCAGCTTGATGTGAGAGAAGGTGTGGACAACCTGGAGGAAGGGTCAAGGGGTTCAAATA
MUTYH	MUTYH_6	chr1	45797003	45797200	ACACTGACGACATGGTTCTACACAACCTGGAGGAAGGGTCAAG	TACGGTAGCAGAGACTTGGTCTGTCCGTGACCTGGGAGC	198	61	CAACCTGGAGGAAGGGTCAAGGGGTTCAAATAGGCCTGTGGATATAGCCTCAAAAGCCAACATCCTTGGCTATTCCGCTGCTCACTTACCTCCCCAAGGTGCCGGAGGTGCGTGGCTGGGAGGGGCCCAGCCCAACGCTGTAGTTCCTGCAGCAGGGCCTTGCGCTGAAGCTGCTCTGAGGGCTCCCAGGTCACGGAC
MUTYH	MUTYH_7	chr1	45797072	45797249	ACACTGACGACATGGTTCTACACTATTCCGCTGCTCACTTACCTC	TACGGTAGCAGAGACTTGGTCTCCTGGCTGCCCTCCCT	178	66	CTATTCCGCTGCTCACTTACCTCCCCAAGGTGCCGGAGGTGCGTGGCTGGGAGGGGCCCAGCCCAACGCTGTAGTTCCTGCAGCAGGGCCTTGCGCTGAAGCTGCTCTGAGGGCTCCCAGGTCACGGACGGGAACTCCCACAGTCCTGCCAGCAGACCTGAGAGGGAGGGCAGCCAGG
MUTYH	MUTYH_8	chr1	45797271	45797458	ACACTGACGACATGGTTCTACACGATTCCCTCCATTCTCTCTTGT	TACGGTAGCAGAGACTTGGTCTGAGTGGTCAACTTCCCCAGAAA	188	61	CGATTCCCTCCATTCTCTCTTGTTACTCATGCCACTGCCCTCCACGCCCAGTATCCAGGTACCTGAGTTGGGCCTCTGCACCAGCAGAATTTGGGCCCCAAGGGCCCCAGGCTGTTCCAGAACACAGGTGGCAGAGCTCTCCTCCCTGGGGGGCTTGCGGCTGGCCTTTCTGGGGAAGTTGACCACTC
MUTYH	MUTYH_9	chr1	45797374	45797568	ACACTGACGACATGGTTCTACAGCCCCAGGCTGTTCCA	TACGGTAGCAGAGACTTGGTCTCTAAAGCCCTCTTGGCTTGAGTA	195	64	GCCCCAGGCTGTTCCAGAACACAGGTGGCAGAGCTCTCCTCCCTGGGGGGCTTGCGGCTGGCCTTTCTGGGGAAGTTGACCACTCCCAGGGTCTGGTCCCAGGGCTCCGAGGGAGGCAGGCACAGGTGGCACTGTCCAGTGTTGGGAGCTGGGAACGGAGATCCCCGAACCCTACTCAAGCCAAGAGGGCTTTAG
MUTYH	MUTYH_10	chr1	45797614	45797795	ACACTGACGACATGGTTCTACAACTCAGGTTAGAGGAAGAACTGGA	TACGGTAGCAGAGACTTGGTCTGACTCTGCCCTATGACACTCAAC	182	59	ACTCAGGTTAGAGGAAGAACTGGAATGGGGCTTCTGACTGGGCCAGGAAGGGTTGGGGTGGGGGCTAGGTTTGGTGCTCACCACACTCCTCCACGTCAGGACTGCCCGACAGGCTCCCTGAGGCTAAGAGCTGTTCCTGCTCCACCTGAGAGGCACAGGGTTGAGTGTCATAGGGCAGAGTC
MUTYH	MUTYH_11	chr1	45797817	45798009	ACACTGACGACATGGTTCTACACCCCTTCCCCAGTAGGCTT	TACGGTAGCAGAGACTTGGTCTCTTCACAGCAGTGTTCCCTTCTT	193	63	CCCCTTCCCCAGTAGGCTTACTCTCTGGCGTGCCCGGCACAGGCTCTCCACAGGGCACTGGCTGCACAGTGGGCGCTGTGGGGTACACACTGTGGCCCCTAGCTCCATGGCTGCTTGGTTGAAATCTCCTGGCCGGGCTGGGTCCACCAGCTGCTGGGCTAGACCCCTAAAAGAAGGGAACACTGCTGTGAAG
MUTYH	MUTYH_12	chr1	45798010	45798187	ACACTGACGACATGGTTCTACACAGAGCTCCTTTGCAGACACC	TACGGTAGCAGAGACTTGGTCTGCTAACTCTTTGGCCCCTCTG	178	60	CAGAGCTCCTTTGCAGACACCCCTGAAGCACCCTTGTTACCCCAACATCCTACCAGAGCTGCTGGGAAACAAGGGTGCTGCTGGGATCAGCACCAATGGCTCGGACACGGCACAGCACCCGTGCTACGTTGCCATCCACCACACCGGTTGCCTGGCACAGAGGGGCCAAAGAGTTAGC
MUTYH	MUTYH_13	chr1	45798165	45798337	ACACTGACGACATGGTTCTACACACAGAGGGGCCAAAGAGTTAG	TACGGTAGCAGAGACTTGGTCTACATGCCACGTACAGCAGAG	173	64	CACAGAGGGGCCAAAGAGTTAGCCTGGGCTGGGAGGAAGGAGGCTGGGCACGCACAAAGTGGGGGTGGGCTGTGAGATCACCTGGCCAAAGGCGATAGAGGCAATGGCCCCAGCTGTGTAGCGCCCCACGCCAGGCAGGAGCTGCTGCAGGGTCTCTGCTGTACGTGGCATGT
MUTYH	MUTYH_14	chr1	45798250	45798445	ACACTGACGACATGGTTCTACACCAAAGGCGATAGAGGCAATGG	TACGGTAGCAGAGACTTGGTCTGAGCTCGGAAGGTAAGGGGAT	196	59	CCAAAGGCGATAGAGGCAATGGCCCCAGCTGTGTAGCGCCCCACGCCAGGCAGGAGCTGCTGCAGGGTCTCTGCTGTACGTGGCATGTGGCCCCCTAGCTCCTCTACCACCTGATTGGAGTGCAAGACTCAAGATTATAAGACACCCAAGACTCCTGGGTTCCTACCCTCCTGCCATCCCCTTACCTTCCGAGCTC
MUTYH	MUTYH_15	chr1	45798343	45798539	ACACTGACGACATGGTTCTACACCTAGCTCCTCTACCACCTGATT	TACGGTAGCAGAGACTTGGTCTGGTGATCTCTTTGACCTCTGATCC	197	56	CCTAGCTCCTCTACCACCTGATTGGAGTGCAAGACTCAAGATTATAAGACACCCAAGACTCCTGGGTTCCTACCCTCCTGCCATCCCCTTACCTTCCGAGCTCCCTCCTGCAGCCGCCGGCCACGAGAATAGTAGCCCAGGCCAGCCCAGAGTTGATTCACCTCCTGTGGGTAGGATCAGAGGTCAAAGAGATCACC
MUTYH	MUTYH_16	chr1	45798494	45798675	ACACTGACGACATGGTTCTACAGTTGATTCACCTCCTGTGGGTAG	TACGGTAGCAGAGACTTGGTCTCTTCACCCTTGACCTTGTCTCTT	182	54	GTTGATTCACCTCCTGTGGGTAGGATCAGAGGTCAAAGAGATCACCCGTCAGTCCCTCTATTGTTCCTATTTCCCCTACCCTAGGGTGGCTCTCACCTCCAGGGAAGCACTGGCCAGGTCCTGCAGTGTAGGCCACTTCTATAGCCACAGGCAGGCAGAAAGAGACAAGGTCAAGGGTGAAG
MUTYH	MUTYH_17	chr1	45798691	45798869	ACACTGACGACATGGTTCTACATTCTCTACACCCACCCCAAAGTA	TACGGTAGCAGAGACTTGGTCTGTCCTCATGCCAACCCCTTT	179	57	TTCTCTACACCCACCCCAAAGTAGAGGCTCTCATCTGGGGTCTGACCCATGACCCTTCCCTTCCTCCCCTGGAGTCACCTGCATCCATCCGGTATAGTAGTTGATCACAGTGGCAACCTGGGTCTGCTGCAGCATGACCTCTGAGACCCACACTGGGGGAAAGGGGTTGGCATGAGGAC
MUTYH	MUTYH_18	chr1	45798849	45799033	ACACTGACGACATGGTTCTACAGAAAGGGGTTGGCATGAGGAC	TACGGTAGCAGAGACTTGGTCTCTCCACCCTAACTCCTCATCTGG	185	60	GAAAGGGGTTGGCATGAGGACACTGCTGACCTGCCCCTACCTGGCCCACAGCCCCCAGACCCAAGGGCCTCGAGGCAAAGTGGCCCTGCTCTCAGGAGATGTACTGACCAGCATATGCCCGCCTGTCCAGGTCCATCTCATCTTCTGCCTGTCAATGCAACCCCAGATGAGGAGTTAGGGTGGAG
MUTYH	MUTYH_19	chr1	45799011	45799208	ACACTGACGACATGGTTCTACACCAGATGAGGAGTTAGGGTGGA	TACGGTAGCAGAGACTTGGTCTGGTATTGCAGGCCTCTGTCT	198	59	CCAGATGAGGAGTTAGGGTGGAGGGGGCTGGGTGCCTGCCTCCCACCCACTGTCCCTGCTCCTCGCCTGCCTACCCGTCTTCTCCATGGTAGGTCCCGTTTCTCTTGGTCGTACCAGCTTAGCAGGCTCCCTCGGAAGGCTGTGACTTCAGCTACGTCTCTGAATAGATGGTATGAGGAGACAGAGGCCTGCAATACC
MUTYH	MUTYH_20	chr1	45799101	45799299	ACACTGACGACATGGTTCTACAAGGTCCCGTTTCTCTTGGTC	TACGGTAGCAGAGACTTGGTCTGTGTCCCAAGACCCTGATGC	199	59	AGGTCCCGTTTCTCTTGGTCGTACCAGCTTAGCAGGCTCCCTCGGAAGGCTGTGACTTCAGCTACGTCTCTGAATAGATGGTATGAGGAGACAGAGGCCTGCAATACCACCTCTTCCGGCTGCCTGGCCAGGCCTGCTGGGGCCCCAGGACACTCAGCAATCATCCCTGCACAGGCTGTGCATCAGGGTCTTGGGACAC
MUTYH	MUTYH_21	chr1	45800005	45800200	ACACTGACGACATGGTTCTACACCAGCCTGAATCTGCCTTTCAT	TACGGTAGCAGAGACTTGGTCTGGGTCTTTTTGTTTCAGGCCATC	196	56	CCAGCCTGAATCTGCCTTTCATGGCCAATGAGCCTTGGGCCACAACCTAGTTCCTTACCATCACAGGCAGAAGGCTTGGCCTGACTGTTGTTCTTAGCATGCTTCTGCCTCCCTTCCTGGCTGGCTGCCTGCTTCCTGTGACCACTTCCCACGGCTGCTCGTGGCTTCCTCATGATGGCCTGAAACAAAAAGACCC
MUTYH	MUTYH_22	chr1	45805839	45806011	ACACTGACGACATGGTTCTACACATCCCCGACTGCCTGAAC	TACGGTAGCAGAGACTTGGTCTGAGGCTTTGAAGGCTACCTCTG	173	65	CATCCCCGACTGCCTGAACCGCGCCAGGAGACGGACCGCAAGTCCAGCGTACCCACAGACGACTCAGGCGGGAGACGAGCGGTGTCATGGCCGCCGACAGTGACGATGGCGCAGTTTCAGCTCCCGCAGCTTCCGACGGTGAGCGGCTTCCCAGAGGTAGCCTTCAAAGCCTC
NBN	NBN_1	chr8	90947744	90947929	ACACTGACGACATGGTTCTACAACCTTGTTGGCCTGAAGTAGATG	TACGGTAGCAGAGACTTGGTCTAGTGTGACTACAGTTTGAAAGTTCT	186	33	ACCTTGTTGGCCTGAAGTAGATGCTTACTAGGAAGTTTTTCCATGGCTTCTTTTTAAAATCCTCAGTTATCTTCTCCTTTTTAAATAAGGATTGTATCTGCAAAGAAAGAAATGGGGTTAAATGATATTTAGATAAGGGATGGTATTTCTTTTAAAGGTAAAGAACTTTCAAACTGTAGTCACACT
NBN	NBN_2	chr8	90949217	90949415	ACACTGACGACATGGTTCTACATCTCAAAGGTACATGAGAAAGGTGA	TACGGTAGCAGAGACTTGGTCTTGACCTCCAGGATGTGGAAATCT	199	34	TCTCAAAGGTACATGAGAAAGGTGAATCAAACTTTACCTAAAAAGATCATCAGCAAGAGACTCTTCTTTTGCATGTTGATTTTGTACCTGTCAAAATTAACATAATTTCAAACATTTGCTCAGTGGTGAATATATAGTTAATGAATTGCTATAGTGATAGGTCACTGTCATCTTAGAGATTTCCACATCCTGGAGGTCA
NBN	NBN_3	chr8	90955404	90955580	ACACTGACGACATGGTTCTACAGAAGAATTTGCTTGAAGGCCACC	TACGGTAGCAGAGACTTGGTCTAGCAGGAAAACTTCCACACATCA	177	43	GAAGAATTTGCTTGAAGGCCACCATAATGGACCAAAGTGCAATTTAAGCAAGTTTCTGGGCCTCACTTCCTACTAACCTCCATTTCCTGCCTTAGCCACTCTTCTAGTTCTGTATTCTTTCGAGCATGATGAGCTATTAGATCTGATCCTCCAATGATGTGTGGAAGTTTTCCTGCT
NBN	NBN_4	chr8	90955491	90955689	ACACTGACGACATGGTTCTACATGCCTTAGCCACTCTTCTAGT	TACGGTAGCAGAGACTTGGTCTGCATGATTTACCATCTTTGCTTTTTAATCT	199	33	TGCCTTAGCCACTCTTCTAGTTCTGTATTCTTTCGAGCATGATGAGCTATTAGATCTGATCCTCCAATGATGTGTGGAAGTTTTCCTGCTCCAGGATATGTGACCTATTGAATAATAAAAGTAGTACAGTAAATCATATTAACAAACAAAAATGACCATTTTTTTAAAAAGATTAAAAAGCAAAGATGGTAAATCATGC
NBN	NBN_5	chr8	90958336	90958509	ACACTGACGACATGGTTCTACACTGACCTCTTGTGATACAGTTGA	TACGGTAGCAGAGACTTGGTCTTCAGGATGATAGTGAGATGCTTCC	174	33	CTGACCTCTTGTGATACAGTTGAAATACCTACCTTTTTGAATTTCTTGAAATTTTTTAGTTGACCATAATCATCATTTATGCCAGATGGATTTCTGGAAGTAGAGTTTTTAATCACCAGTGATCTAAATTCAGTCAATAACAGCTTTTTTGGAAGCATCTCACTATCATCCTGA
NBN	NBN_6	chr8	90958430	90958585	ACACTGACGACATGGTTCTACATGGAAGTAGAGTTTTTAATCACCAGT	TACGGTAGCAGAGACTTGGTCTACAAGTGACTTTTCTTTGTTATTTCTTCT	156	33	TGGAAGTAGAGTTTTTAATCACCAGTGATCTAAATTCAGTCAATAACAGCTTTTTTGGAAGCATCTCACTATCATCCTGAAGTTTGTCATTGTTCTTAAATGGGGTTAAGATGGATAGGTAAGAAAGAGAAGAAATAACAAAGAAAAGTCACTTGT
NBN	NBN_7	chr8	90959991	90960173	ACACTGACGACATGGTTCTACATTGATGAGATGACAGTCCCCGTA	TACGGTAGCAGAGACTTGGTCTAACATACCATTTTATTACTCCTATGAACAG	183	31	TTGATGAGATGACAGTCCCCGTAAGCCAAATCTGTATAAAAATTAATAAAACGTTTCTCACAGATATTTCTTTAGCTGACCATAGTGAGTCTTCCTTGAGTTCACGTTTCTTCCCAATTTCATTTTCTTGCTAAAGAAATAAAATAAAAAATACTGTTCATAGGAGTAATAAAATGGTATGTT
NBN	NBN_8	chr8	90965401	90965586	ACACTGACGACATGGTTCTACAACAAAATCGAAAGTACCTGTTAGC	TACGGTAGCAGAGACTTGGTCTTGTGAAAGTTCAAAAACAGGAGGA	186	34	ACAAAATCGAAAGTACCTGTTAGCATTCTAAGCTTCTATGTACTATACCTCTCATTTAAAATGTTACTTACAGATATTTTGCTACTTTCTGGTACTGCTTCATCACTGAAAGTGTCATTTGTTTCTATATCCATCCTTGGCCTTTTTCTAACATTGACATCTTCCTCCTGTTTTTGAACTTTCACA
NBN	NBN_9	chr8	90965500	90965697	ACACTGACGACATGGTTCTACATCATCACTGAAAGTGTCATTTGTTT	TACGGTAGCAGAGACTTGGTCTTGCTGCAGAAAAGCTAAGATCAA	198	35	TCATCACTGAAAGTGTCATTTGTTTCTATATCCATCCTTGGCCTTTTTCTAACATTGACATCTTCCTCCTGTTTTTGAACTTTCACATCAATTTCTAACTCTGGTTTTGTGTCCTTGAATAACTGTTCCAATACTTCATCTTCTATGGCCACATCATCCATTTCCCTTTTTTTATTTGATCTTAGCTTTTCTGCAGCA
NBN	NBN_10	chr8	90965597	90965794	ACACTGACGACATGGTTCTACAACTCTGGTTTTGTGTCCTTGAAT	TACGGTAGCAGAGACTTGGTCTTATCTGAGAATGAGCCTGTGGAC	198	34	ACTCTGGTTTTGTGTCCTTGAATAACTGTTCCAATACTTCATCTTCTATGGCCACATCATCCATTTCCCTTTTTTTATTTGATCTTAGCTTTTCTGCAGCATGAGATTTACTGGCAGAATTTTTCACAATAGATTTTAAATCTGTATCTGTAAATAAGTTATTGTCTGAGTTTGTGTCCACAGGCTCATTCTCAGATA
NBN	NBN_11	chr8	90965688	90965885	ACACTGACGACATGGTTCTACATTCTGCAGCATGAGATTTACTGG	TACGGTAGCAGAGACTTGGTCTTGCAAATCAGCAAGAATAGAAACGTC	198	36	TTCTGCAGCATGAGATTTACTGGCAGAATTTTTCACAATAGATTTTAAATCTGTATCTGTAAATAAGTTATTGTCTGAGTTTGTGTCCACAGGCTCATTCTCAGATAGATGCTGCTCCTTATTTTTCCACAATGAGGGTGTAGCAGGTTGTGTTTGTTCTAAAAGAGAACAAGACGTTTCTATTCTTGCTGATTTGCA
NBN	NBN_12	chr8	90965780	90965969	ACACTGACGACATGGTTCTACAGCTCATTCTCAGATAGATGCTGCT	TACGGTAGCAGAGACTTGGTCTAGCTGTGTTCATTTTCTTGTTTTGTT	190	35	GCTCATTCTCAGATAGATGCTGCTCCTTATTTTTCCACAATGAGGGTGTAGCAGGTTGTGTTTGTTCTAAAAGAGAACAAGACGTTTCTATTCTTGCTGATTTGCATGAAGACATTTCTTGATTTTCTTCATCCCTTTCCCTTAGATTTAAAAAAAAAGAAGAAAACAAAACAAGAAAATGAACACAGCT
NBN	NBN_13	chr8	90967424	90967621	ACACTGACGACATGGTTCTACAACAGACTAAAGACAATACCATTCTACA	TACGGTAGCAGAGACTTGGTCTTCAGCTTTCACCAACTAAATTGCC	198	35	ACAGACTAAAGACAATACCATTCTACAACAGTATAAAAAACTTTCATTTTTTTTTCAGAGACATGAGAGAAGTTATCAAAAACAGACCTTTTTTTGGTAGACGGCTGAAAGTAGTTTCTGATGGAGTTGGTCTGCTGCTGCTGAGAAGCCCTATCTTTACTTTTATTTATACTTGGCAATTTAGTTGGTGAAAGCTGA
NBN	NBN_14	chr8	90967516	90967696	ACACTGACGACATGGTTCTACATTTGGTAGACGGCTGAAAGTAGT	TACGGTAGCAGAGACTTGGTCTGGAGTCCTGCAAAACAAGCTCTA	181	38	TTTGGTAGACGGCTGAAAGTAGTTTCTGATGGAGTTGGTCTGCTGCTGCTGAGAAGCCCTATCTTTACTTTTATTTATACTTGGCAATTTAGTTGGTGAAAGCTGATAGTTTGGGATTCTCATCTTAGCCAAAGTATTTGATACCATACTATTATTATTAGAGCTTGTTTTGCAGGACTCC
NBN	NBN_15	chr8	90967597	90967785	ACACTGACGACATGGTTCTACATGGCAATTTAGTTGGTGAAAGCTG	TACGGTAGCAGAGACTTGGTCTAGGGATTTGAGTGAAAGGCCAAA	189	37	TGGCAATTTAGTTGGTGAAAGCTGATAGTTTGGGATTCTCATCTTAGCCAAAGTATTTGATACCATACTATTATTATTAGAGCTTGTTTTGCAGGACTCCTTTACAGTGGGTGCATCTTGTGAAAGCATTCTGAATTTTTGTTCCATTTTGGAGACTTTGATTTCTTTTGGCCTTTCACTCAAATCCCT
NBN	NBN_16	chr8	90967671	90967842	ACACTGACGACATGGTTCTACATATTAGAGCTTGTTTTGCAGGACT	TACGGTAGCAGAGACTTGGTCTCTCTATTAAAGTTGCTGTAAACTTGATTATTT	172	35	TATTAGAGCTTGTTTTGCAGGACTCCTTTACAGTGGGTGCATCTTGTGAAAGCATTCTGAATTTTTGTTCCATTTTGGAGACTTTGATTTCTTTTGGCCTTTCACTCAAATCCCTGTAGAAAAAGAAAAGAATGCAAGGTAAATAATCAAGTTTACAGCAACTTTAATAGAG
NBN	NBN_17	chr8	90970868	90971047	ACACTGACGACATGGTTCTACAACCTGATAAAGGGCATTACTTCCT	TACGGTAGCAGAGACTTGGTCTCAAGGCGTGTCAGTTGATGAAAA	180	38	ACCTGATAAAGGGCATTACTTCCTGAATATACTATTAATTTATTGATAGAATAATAACAATAGTACGGTAATGAAGAAGCTTTACCATGTATCTGCTTGCTCTGATTCTGTGTCAGCTACGTATGTTGTAGTGTTCACTGGGGCGCTTGGCATTAGTTTTTCATCAACTGACACGCCTTG
NBN	NBN_18	chr8	90970945	90971122	ACACTGACGACATGGTTCTACAAGCTTTACCATGTATCTGCTTGCT	TACGGTAGCAGAGACTTGGTCTAGCAGTTGTGATTCTTTCTTTCTACT	178	43	AGCTTTACCATGTATCTGCTTGCTCTGATTCTGTGTCAGCTACGTATGTTGTAGTGTTCACTGGGGCGCTTGGCATTAGTTTTTCATCAACTGACACGCCTTGTGAAAGGCTTGGTCCTGGAGTTGTTGTCTTTAATCCTGTAAATCACACAAGTAGAAAGAAAGAATCACAACTGCT
NBN	NBN_19	chr8	90976535	90976730	ACACTGACGACATGGTTCTACAGTGAATATGGTCACCCCTAGCAA	TACGGTAGCAGAGACTTGGTCTGTCTTAGACCTATTCCTGAAGCAGA	196	37	GTGAATATGGTCACCCCTAGCAAGTATATGAGTAACGTATATTTAGCTTATCGATTTACATAATAAAGTTGCTAACGAATCAATAAAATAATGCTTCAATTACCTGTACTGGGATGGCCCTGAGGATCACAGTAATTCTTTGTAGTCATGAAAATCACCGCCAATCCAATTTCTGCTTCAGGAATAGGTCTAAGAC
NBN	NBN_20	chr8	90976648	90976822	ACACTGACGACATGGTTCTACAATGGCCCTGAGGATCACAGTA	TACGGTAGCAGAGACTTGGTCTAAAAGAGGTTGCTTTATCTTGACATT	175	33	ATGGCCCTGAGGATCACAGTAATTCTTTGTAGTCATGAAAATCACCGCCAATCCAATTTCTGCTTCAGGAATAGGTCTAAGACCTTGCCTATTAGAATAAAATAGTTTAAGTATGATAATATATTAAAACTAGCAACTTTTATTCAGATAATGTCAAGATAAAGCAACCTCTTTT	Assays designed by relax mode and have no off-target hits
NBN	NBN_21	chr8	90982515	90982689	ACACTGACGACATGGTTCTACAAGGTGAAAAGCAACAAAAAAGGT	TACGGTAGCAGAGACTTGGTCTGGAACGTGTGTTGTTGATACAGG	175	33	AGGTGAAAAGCAACAAAAAAGGTTAAACATAAAATCTCCTACTTGCAGTTTTTTACTAATAAAGAATAATTCTATACCTTTGGAGCATATCCATTATTGACTGAATCCATTTCTTCTGACAGTCAGGAATTAAGGTCTGTGAGTTTGTTATTCCTGTATCAACAACACACGTTCC
NBN	NBN_22	chr8	90982584	90982777	ACACTGACGACATGGTTCTACATTCTATACCTTTGGAGCATATCCATT	TACGGTAGCAGAGACTTGGTCTATTGAGTTCCGCAGTTGTCTTTG	194	40	TTCTATACCTTTGGAGCATATCCATTATTGACTGAATCCATTTCTTCTGACAGTCAGGAATTAAGGTCTGTGAGTTTGTTATTCCTGTATCAACAACACACGTTCCCGGAGCCAAAAAGAAATTATGTTCTTCTTCATTCTCTTCTGTTATCAACCTAGCTTCCCCACCTCCAAAGACAACTGCGGAACTCAAT
NBN	NBN_23	chr8	90982666	90982862	ACACTGACGACATGGTTCTACATCCTGTATCAACAACACACGTTC	TACGGTAGCAGAGACTTGGTCTTGTTTCCCAAATCAAATTCTTATGTGTT	197	35	TCCTGTATCAACAACACACGTTCCCGGAGCCAAAAAGAAATTATGTTCTTCTTCATTCTCTTCTGTTATCAACCTAGCTTCCCCACCTCCAAAGACAACTGCGGAACTCAATTTCTTATGCTAAAAATGGAAGGAAACATTTTTTAAAGTAAAATGTAGTAATTTTTTGAACACATAAGAATTTGATTTGGGAAACA
NBN	NBN_24	chr8	90983328	90983517	ACACTGACGACATGGTTCTACAACTGATAAGAGTTAATAATGTATCCTAGTTTGT	TACGGTAGCAGAGACTTGGTCTTTTTACCCACCTCTTGATGAACC	190	31	ACTGATAAGAGTTAATAATGTATCCTAGTTTGTAATGTATTCTTTAGGAAAATTTAGCTTATAACATAATTACCTGTTTGGCATTCAAAAATATAAATGTTTTCCCTTTGAAGATTTGTTTTCTTTCCTGCCGTCCTGACAGATCAACATTTTTACTTCCAATAGATGGTTCATCAAGAGGTGGGTAAAA
NBN	NBN_25	chr8	90983428	90983598	ACACTGACGACATGGTTCTACATTTCCCTTTGAAGATTTGTTTTCTTTCC	TACGGTAGCAGAGACTTGGTCTTGTCAGATAGTCACTCCGTTTAC	171	31	TTTCCCTTTGAAGATTTGTTTTCTTTCCTGCCGTCCTGACAGATCAACATTTTTACTTCCAATAGATGGTTCATCAAGAGGTGGGTAAAAACTGTAAAAATAATTAAAGTATATTCTAATTATATACTACTATGTTTGCTATTAAATTGTAAACGGAGTGACTATCTGACA
NBN	NBN_26	chr8	90990337	90990512	ACACTGACGACATGGTTCTACAACACAGCAACTATTACATCCTGAA	TACGGTAGCAGAGACTTGGTCTCCAGAATATTTTACTGAATTCCTGAAAGC	176	31	ACACAGCAACTATTACATCCTGAAACAAGCATTAAAGAGGGAATTAACTTAAATAAAAATCAATGCTATCATATAAGTGACATCTTGTTATATTTAAAATACATAATATACCTTTCAATTTGTGGAGGCTGCTTCTTGGACTCAACTGCTTTCAGGAATTCAGTAAAATATTCTGG
NBN	NBN_27	chr8	90990488	90990662	ACACTGACGACATGGTTCTACATCAGGAATTCAGTAAAATATTCTGGCTTTA	TACGGTAGCAGAGACTTGGTCTACATTATTTTTTATGGATGTAAACAGCCTC	175	29	TCAGGAATTCAGTAAAATATTCTGGCTTTACAATTGGACGTCCACAAATGAGTGCACATATTGTCTACAATGAAGAAAACATGTGAATATATATATTCACATGCTAGCATTTTTTAAAGAAAAGTTTTAAGTTATAAACTACAAAGAGGCTGTTTACATCCATAAAAAATAATGT
NBN	NBN_28	chr8	90992886	90993056	ACACTGACGACATGGTTCTACAAAAAAATCTGTGTATAGTGGGTAAGC	TACGGTAGCAGAGACTTGGTCTATCAAGCTATATTGCAACTTGGAGG	171	32	AAAAAATCTGTGTATAGTGGGTAAGCTTAAATTCAAATAACTTATTTTTAACATAAGAACAAGACATTCAACCTACTTTAATGGTAACTTTCACTGATACCATGACAAGGTGAGTGCATTCTTCTGTCCAATTGTTTACAGTAAATCCTCCAAGTTGCAATATAGCTTGAT
NBN	NBN_29	chr8	90992982	90993176	ACACTGACGACATGGTTCTACAATACCATGACAAGGTGAGTGCAT	TACGGTAGCAGAGACTTGGTCTTGCCATCTCTGCAACTCTGATAC	195	36	ATACCATGACAAGGTGAGTGCATTCTTCTGTCCAATTGTTTACAGTAAATCCTCCAAGTTGCAATATAGCTTGATTTAAAGCAGTTTTCCCAGAGACATCTAAACAAGAAGAGCATGCAACCAAAGGCTCATACTCTATTCTGTAAATGAGAATAAGTTAAATAAAGTCATAGTATCAGAGTTGCAGAGATGGCA
NBN	NBN_30	chr8	90993536	90993706	ACACTGACGACATGGTTCTACATCATTTTCCTTTAGGATTTGGCTGA	TACGGTAGCAGAGACTTGGTCTAAGTATGGTACCTTTGTTAATGAGGA	171	35	TCATTTTCCTTTAGGATTTGGCTGAAACAAAGCTGTCCATTTTAAAATCAATTTTAAAATGTCTTACCTGAATTTACTTCCAAACACTCCAAAAGTAATACCATCCCCCGACTTCAAAGTTCGGGAAAAGCCATTCTGCATTTTTTCCTCATTAACAAAGGTACCATACTT
NBN	NBN_31	chr8	90993625	90993807	ACACTGACGACATGGTTCTACACAAAAGTAATACCATCCCCCGACT	TACGGTAGCAGAGACTTGGTCTTGAGAAGTGAATGTACTGAGTGGT	183	34	CAAAAGTAATACCATCCCCCGACTTCAAAGTTCGGGAAAAGCCATTCTGCATTTTTTCCTCATTAACAAAGGTACCATACTTAGAATTATCTTTTAATGTCAATACAGGGATTTCATCTGTTTGACTCTGAAAAGTTAGCAAATAATTTAAAGTCTTTTACCACTCAGTACATTCACTTCTCA
NBN	NBN_32	chr8	90994897	90995075	ACACTGACGACATGGTTCTACATTGTGATTTCAACCCCCTTACTG	TACGGTAGCAGAGACTTGGTCTTACAGACTTTTGACTGGCGTTGA	179	39	TTGTGATTTCAACCCCCTTACTGGAAACTAGTGAAATAAAATTAGTAACATACCAGGTTGGTTACAGAAAAGTTAGCAGTTAACACAGCATGATTTCGGCTGATCGACTGATCATTTTCAATCAGAATGGCACAGTTTTTCCTTCCAACAACGTACTCAACGCCAGTCAAAAGTCTGTA
NBN	NBN_33	chr8	90994967	90995141	ACACTGACGACATGGTTCTACAAGTTAGCAGTTAACACAGCATGA	TACGGTAGCAGAGACTTGGTCTCGTGTACATGTGTATGTGTCTATCAA	175	37	AGTTAGCAGTTAACACAGCATGATTTCGGCTGATCGACTGATCATTTTCAATCAGAATGGCACAGTTTTTCCTTCCAACAACGTACTCAACGCCAGTCAAAAGTCTGTATGGTTCTCCTGAGataaatttttttttaaaaaaaGATAAGTTGATAGACACATACACATGTACACG
NBN	NBN_34	chr8	90996666	90996845	ACACTGACGACATGGTTCTACAGACGCGACGCAGGAATCA	TACGGTAGCAGAGACTTGGTCTCTAGCAGCCCCGGTTACG	180	70	GACGCGACGCAGGAATCACCCGCAGGCCCTCCCCCGAGGCAGTCGCTACCGGGAAAATAGGCCCCGAGGCTTCCCTTCTGCCCTTACCTCCTGCCGGGCCCGCGGCGGGCAGCAGTTTCCACATCGGTCCGGCTCCTCAGGGCTGGGGCCGACGTGCAACCGCGTAACCGGGGCTGCTAG
NF1	NF1_1	chr17	29422256	29422454	ACACTGACGACATGGTTCTACACTCCCCGCCCTCTTCCC	TACGGTAGCAGAGACTTGGTCTCTCCCCTCACCTACTCTGTCC	199	76	ctccccgccctcttcccggcccagggcgccggcccacccttccctccgccgccccccggccGCGGGGAGGACATGGCCGCGCACAGGCCGGTGGAATGGGTCCAGGCCGTGGTCAGCCGCTTCGACGAGCAGGTAACCGGCCCGTGGCGGGCGGGAGGTGGGAGCGGAGTGGGGGTGGGGACAGAGTAGGTGAGGGGAG	One primer sits in the repeat region
NF1	NF1_2	chr17	29482882	29483073	ACACTGACGACATGGTTCTACAAGGTATCTGTGGTTGATGCAGTT	TACGGTAGCAGAGACTTGGTCTTGATTAGACATTCCTTGTTGTGCT	192	34	AGGTATCTGTGGTTGATGCAGTTTTCCTAAAACGTCATGATTTTCAATGGCAAGTAAGTTATTTATGGTCGTTTTTAAGGATAAGCTGTTAACGTGTTTTTTTTTTCTTTTTTTTTCAGCTTCCAATAAAAACAGGACAGCAGAACACACATACCAAAGTCAGTACTGAGCACAACAAGGAATGTCTAATCA
NF1	NF1_3	chr17	29483000	29483174	ACACTGACGACATGGTTCTACAGCTTCCAATAAAAACAGGACAGCA	TACGGTAGCAGAGACTTGGTCTTCCCCAAAACACAGTAACCCAAA	175	36	GCTTCCAATAAAAACAGGACAGCAGAACACACATACCAAAGTCAGTACTGAGCACAACAAGGAATGTCTAATCAATATTTCCAAATACAAGTTTTCTTTGGTTATAAGCGGCCTCACTACTATTTTAAAGAATGTTAACAATATGGTGAGTATTTGGGTTACTGTGTTTTGGGGA
NF1	NF1_4	chr17	29485960	29486150	ACACTGACGACATGGTTCTACATCAGATGTGTGTTGATTGGTAGC	TACGGTAGCAGAGACTTGGTCTAATTCACAAAGCCTGCCTACTTA	191	33	TCAGATGTGTGTTGATTGGTAGCAGAAAGTGAAACTAACTTTTATGTTCTGAATATCTTTTCTGTTAGAGAATATTTGGAGAAGCTGCTGAAAAAAATTTATATCTCTCTCAGTTGATTATATTGGATACACTGGAAAAATGTCTTGCTGGGGTAAGTAAATTGATCTTAAGTAGGCAGGCTTTGTGAATT
NF1	NF1_5	chr17	29490111	29490291	ACACTGACGACATGGTTCTACATTTTGTTCTGTGTGTGTGTTTGA	TACGGTAGCAGAGACTTGGTCTCACGACAGGTGTGAAGAAAATGG	181	33	ttttgttctgtgtgtgtgtttgaaaattttcataatagaaaatgttTACAGGTAAAATTAAAGTTTAGAATAATGTGATTATTTCTATTTTAGCAACCAAAGGACACAATGAGATTAGATGAAACGATGCTGGTCAAACAGTTGCTGCCAGAAATCTGCCATTTTCTTCACACCTGTCGTG	One primer sits in the repeat region
NF1	NF1_6	chr17	29490203	29490376	ACACTGACGACATGGTTCTACAGCAACCAAAGGACACAATGAGAT	TACGGTAGCAGAGACTTGGTCTAAGACTGCATTGAAGTTGTTGC	174	45	GCAACCAAAGGACACAATGAGATTAGATGAAACGATGCTGGTCAAACAGTTGCTGCCAGAAATCTGCCATTTTCTTCACACCTGTCGTGAAGGAAACCAGCATGCAGCTGAACTTCGGAATTCTGCCTCTGGGGTTTTATTTTCTCTCAGCTGCAACAACTTCAATGCAGTCTT
NF1	NF1_7	chr17	29490266	29490464	ACACTGACGACATGGTTCTACACTGCCATTTTCTTCACACCTGTC	TACGGTAGCAGAGACTTGGTCTATGTAGACAAAAAACAAAACTTCTAATATTCAT	199	40	CTGCCATTTTCTTCACACCTGTCGTGAAGGAAACCAGCATGCAGCTGAACTTCGGAATTCTGCCTCTGGGGTTTTATTTTCTCTCAGCTGCAACAACTTCAATGCAGTCTTTAGTCGCATTTCTACCAGGTTAGTGTGTAAATCCACATGGGACTACTGAAGTAATATGAATATTAGAAGTTTTGTTTTTTGTCTACAT
NF1	NF1_8	chr17	29496847	29496996	ACACTGACGACATGGTTCTACAAGATACCACACCTGTCCCCTAAT	TACGGTAGCAGAGACTTGGTCTTTTTGCACAATCCACATTGATATACT	150	30	agataccacacctgtccCCTAATACTTAATTTGATAAGTTAATTTTGGTTTTTACTTTTTAGGTTACAGGAATTAACTGTTTGTTCAGAAGACAATGTTGATGTTCATGATATAGAATTGTTACAGTATATCAATGTGGATTGTGCAAAA	One primer sits in the repeat region
NF1	NF1_9	chr17	29496878	29497075	ACACTGACGACATGGTTCTACATGATAAGTTAATTTTGGTTTTTACTTTTTAGGTT	TACGGTAGCAGAGACTTGGTCTTCATGATACTAGTTTTTGACCCAGT	198	28	TGATAAGTTAATTTTGGTTTTTACTTTTTAGGTTACAGGAATTAACTGTTTGTTCAGAAGACAATGTTGATGTTCATGATATAGAATTGTTACAGTATATCAATGTGGATTGTGCAAAATTAAAACGACTCCTGAAGGGTAAGTTTAAATGTATAATATATCTGAAAAAAATCACTGGGTCAAAAACTAGTATCATGA
NF1	NF1_10	chr17	29508377	29508575	ACACTGACGACATGGTTCTACACTCTGAGTTGTATTTGTGTTAACTTATTCTA	TACGGTAGCAGAGACTTGGTCTCAGGATGCTAACAACAGCAAAT	199	31	CTCTGAGTTGTATTTGTGTTAACTTATTCTAGAGTTAATTTTTAAAAATTGTGTTTTTTCCAGAAACAGCATTTAAATTTAAAGCCCTAAAGAAGGTTGCGCAGTTAGCAGTTATAAATAGCCTGGAAAAGGTAAGTTACAACCTCTCTGGTATTAAAATTTTGTTTTTGATGTAAAATTTGCTGTTGTTAGCATCCTG
NF1	NF1_11	chr17	29508695	29508869	ACACTGACGACATGGTTCTACATCACTGTAAAGACATGTGGTTCT	TACGGTAGCAGAGACTTGGTCTAGGTTTTTATGTCACAAGTAGGCATT	175	33	TCACTGTAAAGACATGTGGTTCTTTATTTATAGGCATTTTGGAACTGGGTAGAAAATTATCCAGATGAATTTACAAAACTGTACCAGATCCCACAGACTGATATGGCTGGTAAGGATACGATTGATTTTTTTTTTTTTTTTGTCTTTTAAATGCCTACTTGTGACATAAAAACCT
NF1	NF1_12	chr17	29509472	29509643	ACACTGACGACATGGTTCTACATGCCAGGGATTTTGTTCCTATCT	TACGGTAGCAGAGACTTGGTCTTCCTGGATTATTTCTGGACACAAG	172	37	TGCCAGGGATTTTGTTCCTATCTAATAATGTCATTTAATATATTTTTCATGCAGAATGTGCAGAAAAGCTATTTGACTTGGTGGATGGTTTTGCTGAAAGCACCAAACGTAAAGCAGCAGTTTGGCCACTACAAATCATTCTCCTTATCTTGTGTCCAGAAATAATCCAGGA
NF1	NF1_13	chr17	29509549	29509747	ACACTGACGACATGGTTCTACATTGGTGGATGGTTTTGCTGAAAG	TACGGTAGCAGAGACTTGGTCTACACCTTGAGTAAAATAAACTGCTTCAC	199	37	TTGGTGGATGGTTTTGCTGAAAGCACCAAACGTAAAGCAGCAGTTTGGCCACTACAAATCATTCTCCTTATCTTGTGTCCAGAAATAATCCAGGATATATCCAAAGACGTGGTTGATGAAAACAACATGAATAAGGTAAGGAGGGCAAAATTATTTCCATTATATCTAGATGTGAAGCAGTTTATTTTACTCAAGGTGT
NF1	NF1_14	chr17	29527333	29527508	ACACTGACGACATGGTTCTACATCTTTATAGTATGAGTTTTAGAGGCTGTT	TACGGTAGCAGAGACTTGGTCTACTTTCTGTCAGCTGCCTACTTC	176	35	TCTTTATAGTATGAGTTTTAGAGGCTGTTAATTTGCTATAATATTAGCTACATCTGGAATAGAAGAAACTTCATATATTATCTTATCGCTATATTTGAATTCTGTAGAAGTTATTTCTGGACAGTCTACGAAAAGCTCTTGCTGGCCATGGAGGAAGTAGGCAGCTGACAGAAAGT
NF1	NF1_15	chr17	29527417	29527603	ACACTGACGACATGGTTCTACAATCGCTATATTTGAATTCTGTAGAAGTTATT	TACGGTAGCAGAGACTTGGTCTACCACCATGGACTGAACAAGTAG	187	42	ATCGCTATATTTGAATTCTGTAGAAGTTATTTCTGGACAGTCTACGAAAAGCTCTTGCTGGCCATGGAGGAAGTAGGCAGCTGACAGAAAGTGCTGCAATTGCCTGTGTCAAACTGTGTAAAGCAAGTACTTACATCAATTGGGAAGATAACTCTGTCATTTTCCTACTTGTTCAGTCCATGGTGGT
NF1	NF1_16	chr17	29527471	29527641	ACACTGACGACATGGTTCTACATTGCTGGCCATGGAGGAAGTA	TACGGTAGCAGAGACTTGGTCTTGTAGTAGAGAAAGAATAAGCATGTTACC	171	42	TTGCTGGCCATGGAGGAAGTAGGCAGCTGACAGAAAGTGCTGCAATTGCCTGTGTCAAACTGTGTAAAGCAAGTACTTACATCAATTGGGAAGATAACTCTGTCATTTTCCTACTTGTTCAGTCCATGGTGGTTGATCTTAAGGTAACATGCTTATTCTTTCTCTACTACA
NF1	NF1_17	chr17	29527588	29527760	ACACTGACGACATGGTTCTACATTCAGTCCATGGTGGTTGATCTT	TACGGTAGCAGAGACTTGGTCTCACAGTAACAACAAAAGCAAGTCC	173	31	TTCAGTCCATGGTGGTTGATCTTAAGGTAACATGCTTATTCTTTCTCTACTACAAACTTTAAGAAAATTAAATGAATTTTCTAGCATAAGTATTATGTCAAAGATAATTGCTAACATTAAAGTTCTGACTCTTCGTTGATAAGTTCATAGGACTTGCTTTTGTTGTTACTGTG
NF1	NF1_18	chr17	29528025	29528199	ACACTGACGACATGGTTCTACAGGCTTTTGTTTTCTGTTGGGGTT	TACGGTAGCAGAGACTTGGTCTAGATAAAAACCAATGCTCTCACCTT	175	41	GGCTTTTGTTTTCTGTTGGGGTTTTTATAGAACCTGCTTTTTAATCCAAGTAAGCCATTCTCAAGAGGCAGTCAGCCTGCAGATGTGGATCTAATGATTGACTGCCTTGTTTCTTGCTTTCGTATAAGCCCTCACAACAACCAACACTTTAAGGTGAGAGCATTGGTTTTTATCT
NF1	NF1_19	chr17	29528139	29528311	ACACTGACGACATGGTTCTACATGCTTTCGTATAAGCCCTCACAA	TACGGTAGCAGAGACTTGGTCTGGTCTTGAAACGAACATCAATACA	173	32	TGCTTTCGTATAAGCCCTCACAACAACCAACACTTTAAGGTGAGAGCATTGGTTTTTATCTAACTATATTTACTGATGCTGTTATCCTTTATAAACAAAAAGACTATAGAGATTAATAGGTTCACTTTTATCGGTATTTCTCACTATTATGTATTGATGTTCGTTTCAAGACC
NF1	NF1_20	chr17	29528348	29528518	ACACTGACGACATGGTTCTACATGCTGTTCTTTTTGGCTTCATTTG	TACGGTAGCAGAGACTTGGTCTACCTTTTGGACTTACATTGGTGA	171	34	TGCTGTTCTTTTTGGCTTCATTTGTATTACTGAGTATTTTTCTCATAGAAATAATCTGCTTTTTTTTTTCTTTTTCTATAGATCTGCCTGGCTCAGAATTCACCTTCTACATTTCACTATGTGCTGGTAAATTCACTCCATCGAATCATCACCAATGTAAGTCCAAAAGGT
NF1	NF1_21	chr17	29528434	29528604	ACACTGACGACATGGTTCTACACCTGGCTCAGAATTCACCTTCTA	TACGGTAGCAGAGACTTGGTCTAACCTTTTTGAAAACCAAGAGTGCAT	171	32	CCTGGCTCAGAATTCACCTTCTACATTTCACTATGTGCTGGTAAATTCACTCCATCGAATCATCACCAATGTAAGTCCAAAAGGTATTGCTAAATTACTAAAAAAATTTTTTTCTTTCTTTTCTTTGCGTATTTCTTTTTAAGAAATGCACTCTTGGTTTTCAAAAAGGTT
NF1	NF1_22	chr17	29533189	29533363	ACACTGACGACATGGTTCTACATGATAAACAGAGCATACAACTCACG	TACGGTAGCAGAGACTTGGTCTCTCCACAACCTTGCACTGCTTTA	175	39	TGATAAACAGAGCATACAACTCACGTAATTTTGTACTTTTTCTTCCTATTGGTCTTTGTTTTTCTCTAGTCCGCATTGGATTGGTGGCCTAAGATTGATGCTGTGTATTGTCACTCGGTTGAACTTCGAAATATGTTTGGTGAAACACTTCATAAAGCAGTGCAAGGTTGTGGAG
NF1	NF1_23	chr17	29533250	29533424	ACACTGACGACATGGTTCTACATTCTCTAGTCCGCATTGGATTGG	TACGGTAGCAGAGACTTGGTCTAGGAGGTGAGATTCAAAATTCGT	175	43	TTCTCTAGTCCGCATTGGATTGGTGGCCTAAGATTGATGCTGTGTATTGTCACTCGGTTGAACTTCGAAATATGTTTGGTGAAACACTTCATAAAGCAGTGCAAGGTTGTGGAGCACACCCAGCAATACGAATGGCACCGGTAAGATAAATCACGAATTTTGAATCTCACCTCCT
NF1	NF1_24	chr17	29541342	29541536	ACACTGACGACATGGTTCTACAACCACACATTTGGTAGTATAAAAAATAGCTT	TACGGTAGCAGAGACTTGGTCTCTTGTCTCCAGGTCTGTAGGTTT	195	28	ACCACACATTTGGTAGTATAAAAAATAGCTTTTTTCAAAGGTTTTTAATAATAAATTTCTTTTAAAAGGTTGGATAGCTATTATCCTGAGTCTTATGTCTGATACCATGTTTTTGTTTTGTTTTTAGAGTCTTACATTTAAAGAAAAAGTAACAAGCCTTAAATTTAAAGAAAAACCTACAGACCTGGAGACAAG
NF1	NF1_25	chr17	29541469	29541656	ACACTGACGACATGGTTCTACAAGTCTTACATTTAAAGAAAAAGTAACAAGC	TACGGTAGCAGAGACTTGGTCTACCCAATTAACTTAGTGTGATAATTTTGAG	188	31	AGTCTTACATTTAAAGAAAAAGTAACAAGCCTTAAATTTAAAGAAAAACCTACAGACCTGGAGACAAGAAGCTATAAGTATCTTCTCTTGTCCATGGTGAAACTAATTCATGCAGATCCAAAGCTCTTGCTTTGTGTAAGTATTTTTTTATGAAATGTCTCAAAATTATCACACTAAGTTAATTGGGT
NF1	NF1_26	chr17	29545920	29546117	ACACTGACGACATGGTTCTACAAGAAACTTGGTACCCTTTAGCAGT	TACGGTAGCAGAGACTTGGTCTATCTCTGGCATGTGTGACTGAGG	198	41	agaaacttggtaccctttagcagtcactgtctatttcttcctccttctaatctcTCTCGATTTATTTATTTTTTTAATTGAAGTTTCCTTTTTTTCCTTGCAGAATCCAAGAAAACAGGGGCCCGAAACCCAAGGCAGTACAGCAGAATTAATTACAGGGCTCGTCCAACTGGTCCCTCAGTCACACATGCCAGAGAT	One primer sits in the repeat region
NF1	NF1_27	chr17	29546017	29546215	ACACTGACGACATGGTTCTACATTGCAGAATCCAAGAAAACAGGG	TACGGTAGCAGAGACTTGGTCTACCACACACCAAAGGAACATCA	199	45	TTGCAGAATCCAAGAAAACAGGGGCCCGAAACCCAAGGCAGTACAGCAGAATTAATTACAGGGCTCGTCCAACTGGTCCCTCAGTCACACATGCCAGAGATTGCTCAGGAAGCAATGGAGGTAAGGGGAAAATGAATTCCATGTTCTTGAAGGAAAGATTGTAACTATGTACATTCATGATGTTCCTTTGGTGTGTGGT
NF1	NF1_28	chr17	29548795	29548973	ACACTGACGACATGGTTCTACAACTCCAGTGTTATGTTTACCAAAAATGT	TACGGTAGCAGAGACTTGGTCTAATTTAAAAAATAAAAGTACATATACCTAATCTCCC	179	32	ACTCCAGTGTTATGTTTACCAAAAATGTTTGAGTGAGTCTTCTCTTTGTCTTTCTCTTTTTTAAAAAATTCAGGCTCTGCTGGTTCTTCATCAGTTAGATAGCATTGATTTGTGGAATCCTGATGCTCCTGTAGAAACATTTTGGGAGATTAGGTATATGTACttttattttttaaatt	One primer sits in the repeat region
NF1	NF1_29	chr17	29548873	29549068	ACACTGACGACATGGTTCTACAGCTGGTTCTTCATCAGTTAGATAGCA	TACGGTAGCAGAGACTTGGTCTACCATAAAACCTTTGGAAGTGTAAGT	196	29	GCTGGTTCTTCATCAGTTAGATAGCATTGATTTGTGGAATCCTGATGCTCCTGTAGAAACATTTTGGGAGATTAGGTATATGTACttttattttttaaattcaacttttaaattttattttgtatttttGTCTTGAAATATTAACTCTGTAGTACTTAGTACATTGTAAAACTTACACTTCCAAAGGTTTTATGGT
NF1	NF1_30	chr17	29550364	29550548	ACACTGACGACATGGTTCTACAACTTGTATTCATTATGGGAGAATGCC	TACGGTAGCAGAGACTTGGTCTATTTCCCGCAACCACTTGAGAAT	185	35	ACTTGTATTCATTATGGGAGAATGCCATTCTTATGTCTGGTTATATCTGCATTAGGTTATTGATGATGCTAGTAACAATGAACTTTATGTTACTGCAGCTCACAAATGCTTTTTTACATCTGCAAGAAATTAACTAGTCATCAAATGCTTAGTAGCACAGAAATTCTCAAGTGGTTGCGGGAAAT
NF1	NF1_31	chr17	29550452	29550645	ACACTGACGACATGGTTCTACAGTTACTGCAGCTCACAAATGC	TACGGTAGCAGAGACTTGGTCTATCTCTCACCATTACCATTCCAAA	194	32	GTTACTGCAGCTCACAAATGCTTTTTTACATCTGCAAGAAATTAACTAGTCATCAAATGCTTAGTAGCACAGAAATTCTCAAGTGGTTGCGGGAAATATTGATCTGCAGGAATAAATTTCTTCTTAAAAATAAGGTAAGCAAAATGACATATTTAAAAAATGGAAGAATATTTGGAATGGTAATGGTGAGAGAT
NF1	NF1_32	chr17	29552059	29552237	ACACTGACGACATGGTTCTACAATTCCTCTTGGTTGTCAGTGCTT	TACGGTAGCAGAGACTTGGTCTGAGGCTCCAGGAGTACGTAGTAA	179	39	ATTCCTCTTGGTTGTCAGTGCTTCAGTAAAGCTTATTTATTTATTTTTTTCTAGCAGGCAGATAGAAGTTCCTGTCACTTTCTCCTTTTTTACGGGGTAGGATGTGATATTCCTTCTAGTGGAAATACCAGTCAAATGTCCATGGATCATGAAGAATTACTACGTACTCCTGGAGCCTC
NF1	NF1_33	chr17	29552122	29552317	ACACTGACGACATGGTTCTACAAGAAGTTCCTGTCACTTTCTCCT	TACGGTAGCAGAGACTTGGTCTACAAACAGAGCACATAAAATGATACA	196	42	AGAAGTTCCTGTCACTTTCTCCTTTTTTACGGGGTAGGATGTGATATTCCTTCTAGTGGAAATACCAGTCAAATGTCCATGGATCATGAAGAATTACTACGTACTCCTGGAGCCTCTCTCCGGAAGGGAAAAGGGAACTCCTCTATGGTCAGCTTCTTCTGTACTTTTTCTGTATCATTTTATGTGCTCTGTTTGT
NF1	NF1_34	chr17	29553428	29553611	ACACTGACGACATGGTTCTACATATGTCTTCCACCCTTGACTCTC	TACGGTAGCAGAGACTTGGTCTCCGGATATCTGCTTCCTCACAGA	184	54	TATGTCTTCCACCCTTGACTCTCAGGATAGTGCAGCAGGATGCAGCGGAACCCCCCCGATTTGCCGACAAGCCCAGACCAAACTAGAAGTGGCCCTGTACATGTTTCTGTGGAACCCTGACACTGAAGCTGTTCTGGTTGCCATGTCCTGTTTCCGCCACCTCTGTGAGGAAGCAGATATCCGG
NF1	NF1_35	chr17	29553562	29553760	ACACTGACGACATGGTTCTACATGGTTGCCATGTCCTGTTTCC	TACGGTAGCAGAGACTTGGTCTATCAGATGCCATGTGCTTTGAGG	199	46	TGGTTGCCATGTCCTGTTTCCGCCACCTCTGTGAGGAAGCAGATATCCGGTGTGGGGTGGATGAAGTGTCAGTGCATAACCTCTTGCCCAACTATAACACATTCATGGAGTTTGCCTCTGTCAGCAATATGATGTCAACAGGTAAATGTGAATAGTGGTTTTTTTTACTCAGTCTGCCTCAAAGCACATGGCATCTGAT
NF1	NF1_36	chr17	29554143	29554338	ACACTGACGACATGGTTCTACACTTCCTACTCCTTTTGGGTGGAG	TACGGTAGCAGAGACTTGGTCTGAGGGGTGTTTCTGTTGCTAAGG	196	49	CTTCCTACTCCTTTTGGGTGGAGCTTATCAGGTTCTCCATTGGCAGGCAGGGCTCTAAGTGCAGTAACTTGATTTGCTGTTGTATTTGCTTAGGAAGAGCAGCACTTCAGAAAAGAGTGATGGCACTGCTGAGGCGCATTGAGCATCCCACTGCAGGAAACACTGAGGTATGCCCTTAGCAACAGAAACACCCCTC
NF1	NF1_37	chr17	29554463	29554633	ACACTGACGACATGGTTCTACAGTTTGAAACTTGGCTGTAGCTGA	TACGGTAGCAGAGACTTGGTCTCAGACTTACCTGGCCATCTTCCAT	171	39	GTTTGAAACTTGGCTGTAGCTGATTGATGTTTAGCTCTAGACTAAGTTGCTTTCAAGTGATAATTGCCTTCATTTTAGGCTTGGGAAGATACACATGCAAAATGGGAACAAGCAACAAAGCTAATCCTTAACTATCCAAAAGCCAAAATGGAAGATGGCCAGGTAAGTCTG
NF1	NF1_38	chr17	29554568	29554741	ACACTGACGACATGGTTCTACAGAACAAGCAACAAAGCTAATCCT	TACGGTAGCAGAGACTTGGTCTTCAGTCTTCACACAGCTATATGTT	174	36	GAACAAGCAACAAAGCTAATCCTTAACTATCCAAAAGCCAAAATGGAAGATGGCCAGGTAAGTCTGTAAAGTTGACTTTTGTCTGTTAACTGATCTGCTAAATATATGTACTTCACTTTGATAATCTTTCAAGAGTCGCTCAGTAAAGTAAACATATAGCTGTGTGAAGACTGA
NF1	NF1_39	chr17	29555953	29556150	ACACTGACGACATGGTTCTACATCATGGAAGAAATGTTGGATAAAGCA	TACGGTAGCAGAGACTTGGTCTGTTGATCCATTCCTGTAGGGAGT	198	39	TCATGGAAGAAATGTTGGATAAAGCATAATTTGTCAAGTCTCAACTAATTAAGGTTTAATTCATGCTTTGCACAAAAATTTTGTGTTTAGGCTGCTGAAAGCCTTCACAAGACCATTGTTAAGAGGCGAATGTCCCATGTGAGTGGAGGAGGATCCATAGATTTGTCTGACACAGACTCCCTACAGGAATGGATCAAC
NF1	NF1_40	chr17	29556059	29556223	ACACTGACGACATGGTTCTACAACAAGACCATTGTTAAGAGGCGAA	TACGGTAGCAGAGACTTGGTCTTATAGGTTGCCAGGCCAGAATTG	165	50	ACAAGACCATTGTTAAGAGGCGAATGTCCCATGTGAGTGGAGGAGGATCCATAGATTTGTCTGACACAGACTCCCTACAGGAATGGATCAACATGACTGGCTTCCTTTGTGCCCTTGGGGGAGTGTGCCTCCAGCAGAGAAGCAATTCTGGCCTGGCAACCTATA
NF1	NF1_41	chr17	29556124	29556301	ACACTGACGACATGGTTCTACAACAGACTCCCTACAGGAATGGAT	TACGGTAGCAGAGACTTGGTCTGTGTATCTGCGTTTCCCTCTGAA	178	52	ACAGACTCCCTACAGGAATGGATCAACATGACTGGCTTCCTTTGTGCCCTTGGGGGAGTGTGCCTCCAGCAGAGAAGCAATTCTGGCCTGGCAACCTATAGCCCACCCATGGGTCCAGTCAGTGAACGTAAGGGTTCTATGATTTCAGTGATGTCTTCAGAGGGAAACGCAGATACAC
NF1	NF1_42	chr17	29556201	29556380	ACACTGACGACATGGTTCTACACAATTCTGGCCTGGCAACCTAT	TACGGTAGCAGAGACTTGGTCTTTGGTCCGTATTTGAAGTCCCAC	180	47	CAATTCTGGCCTGGCAACCTATAGCCCACCCATGGGTCCAGTCAGTGAACGTAAGGGTTCTATGATTTCAGTGATGTCTTCAGAGGGAAACGCAGATACACCTGTCAGCAAATTTATGGATCGGCTGTTGTCCTTAATGGTGTGTAACCATGAGAAAGTGGGACTTCAAATACGGACCAA
NF1	NF1_43	chr17	29556279	29556474	ACACTGACGACATGGTTCTACATTCAGAGGGAAACGCAGATACAC	TACGGTAGCAGAGACTTGGTCTGGAGTCAAAAAACTTGCTGATGGT	196	41	TTCAGAGGGAAACGCAGATACACCTGTCAGCAAATTTATGGATCGGCTGTTGTCCTTAATGGTGTGTAACCATGAGAAAGTGGGACTTCAAATACGGACCAATGTTAAGGATCTGGTGGGTCTAGAATTGAGTCCTGCTCTGTATCCAATGCTATTTAACAAATTGAAGAATACCATCAGCAAGTTTTTTGACTCC
NF1	NF1_44	chr17	29556341	29556515	ACACTGACGACATGGTTCTACATGTGTAACCATGAGAAAGTGGGA	TACGGTAGCAGAGACTTGGTCTAGAGAAAGGTGAAAAATAAGAGAACAC	175	39	TGTGTAACCATGAGAAAGTGGGACTTCAAATACGGACCAATGTTAAGGATCTGGTGGGTCTAGAATTGAGTCCTGCTCTGTATCCAATGCTATTTAACAAATTGAAGAATACCATCAGCAAGTTTTTTGACTCCCAAGGACAGGTAAAGTGTTCTCTTATTTTTCACCTTTCTCT
NF1	NF1_45	chr17	29556749	29556947	ACACTGACGACATGGTTCTACAGGTGCACTTACTCTGTGTGTTTA	TACGGTAGCAGAGACTTGGTCTTGTTCAGAGCTGCCTTCAGTATG	199	37	GGTGCACTTACTCTGTGTGTTTAGATCAGTCAGTTTCATCTCTCTAGGGGGTCTGTCTTCTGGGCATTGATGGCAAATCATTAATGTATTTGTTCTTTCTTTAGGTTTTATTGACTGATACCAATACTCAATTTGTAGAACAAACCATAGCTATAATGAAGAACTTGCTAGATAATCATACTGAAGGCAGCTCTGAACA
NF1	NF1_46	chr17	29556868	29557064	ACACTGACGACATGGTTCTACAACCAATACTCAATTTGTAGAACAAACCA	TACGGTAGCAGAGACTTGGTCTACCAGTATCAGTGTGTAAGAGGT	197	36	ACCAATACTCAATTTGTAGAACAAACCATAGCTATAATGAAGAACTTGCTAGATAATCATACTGAAGGCAGCTCTGAACATCTAGGGCAAGCTAGCATTGAAACAATGATGTTAAATCTGGTCAGGTAAGCATTCTACTGAAATGTAGCAGAAACATTTTAAGAGATAAGAAAAACCTCTTACACACTGATACTGGT
NF1	NF1_47	chr17	29557178	29557375	ACACTGACGACATGGTTCTACAACTTACATTTAATTCGTTTTACTTGATGACT	TACGGTAGCAGAGACTTGGTCTAGAGGTCATCTCTCCTTGCCAT	198	31	ACTTACATTTAATTCGTTTTACTTGATGACTAAAGTATTTAGAATGCCTTCTCTTTTGTCTATATCTGATAATTTTTTTATTGTTTCTATGTCTATATAGGTATGTTCGTGTGCTTGGGAATATGGTCCATGCAATTCAAATAAAAACGAAACTGTGTCAATTAGTTGAAGTAATGATGGCAAGGAGAGATGACCTCT
NF1	NF1_48	chr17	29557274	29557470	ACACTGACGACATGGTTCTACAATAGGTATGTTCGTGTGCTTGGG	TACGGTAGCAGAGACTTGGTCTACTCTTTTTCTGTACTTCATTGGACA	197	36	ATAGGTATGTTCGTGTGCTTGGGAATATGGTCCATGCAATTCAAATAAAAACGAAACTGTGTCAATTAGTTGAAGTAATGATGGCAAGGAGAGATGACCTCTCATTTTGCCAAGAGATGAAATTTAGGTGAGTTCTCAAAAGAGCAATGTAGGGTCTTGTAAATCTTAATATGTCCAATGAAGTACAGAAAAAGAGT
NF1	NF1_49	chr17	29557802	29557992	ACACTGACGACATGGTTCTACATGTGTGTGTGGCTTCAAAAACAT	TACGGTAGCAGAGACTTGGTCTAACTCTCACAGTAAAACCCACTAA	191	37	TGTGTGTGTGGCTTCAAAAACATTGTTTGCTGTTTCTCTTTTCTCCACCATTCTATAGGAATAAGATGGTAGAATACCTGACAGACTGGGTTATGGGAACATCAAACCAAGCAGCAGATGATGATGTAAAATGTCTTACAAGGTAAAAAAAGAATGACCTTCAAGTATTAGTGGGTTTTACTGTGAGAGTT
NF1	NF1_50	chr17	29559019	29559189	ACACTGACGACATGGTTCTACATTGAGGGGAAGTGAAAGAACTTG	TACGGTAGCAGAGACTTGGTCTTTGGCTTCCATCAATTCCACACC	171	39	TTGAGGGGAAGTGAAAGAACTTGAAAGATTCATGGTCTCTAAAttttttttttttttttttttttttttCAGAGATTTGGACCAGGCAAGCATGGAAGCAGTAGTTTCACTTCTAGCTGGTCTCCCTCTGCAGCCTGAAGAAGGAGATGGTGTGGAATTGATGGAAGCCAA
NF1	NF1_51	chr17	29559085	29559256	ACACTGACGACATGGTTCTACAtttCAGAGATTTGGACCAGGCAA	TACGGTAGCAGAGACTTGGTCTGGGGCTTTATTTGCTTTTTGCTTTA	172	41	tttCAGAGATTTGGACCAGGCAAGCATGGAAGCAGTAGTTTCACTTCTAGCTGGTCTCCCTCTGCAGCCTGAAGAAGGAGATGGTGTGGAATTGATGGAAGCCAAATCACAGTTATTTCTTAAGTAAATTTCAGTCACCAAAAAACATAAAGCAAAAAGCAAATAAAGCCCC	One primer sits in the repeat region
NF1	NF1_52	chr17	29559647	29559826	ACACTGACGACATGGTTCTACATTGGAATGTCTGGTTAGCTTTCT	TACGGTAGCAGAGACTTGGTCTCAGTGATGCCAGCCTCCG	180	42	TTGGAATGTCTGGTTAGCTTTCTAGTTGATACGGCCTTCACTATGTAAAGGTCAGTCTTTTTATTTCTCAGATACTTCACATTATTTATGAACCTTTTGAATGACTGCAGTGAAGTTGAAGATGAAAGTGCGCAAACAGGTGGCAGGAAACGTGGCATGTCTCGGAGGCTGGCATCACTG
NF1	NF1_53	chr17	29559760	29559958	ACACTGACGACATGGTTCTACAAGTTGAAGATGAAAGTGCGCAAA	TACGGTAGCAGAGACTTGGTCTTCTTACATGCCAGTTCTCTAGGT	199	45	AGTTGAAGATGAAAGTGCGCAAACAGGTGGCAGGAAACGTGGCATGTCTCGGAGGCTGGCATCACTGAGGCACTGTACGGTCCTTGCAATGTCAAACTTACTCAATGCCAACGTAGACAGTGGTCTCATGCACTCCATAGGTGAGATCAAATGAAAGTTTCATATAGAAATACAAAACCTAGAGAACTGGCATGTAAGA
NF1	NF1_54	chr17	29559995	29560175	ACACTGACGACATGGTTCTACAATTTGCATCTGTTTGTCCACATT	TACGGTAGCAGAGACTTGGTCTGATCACCCATCATTGTGACCAGT	181	42	ATTTGCATCTGTTTGTCCACATTAGGCTTAGGTTACCACAAGGATCTCCAGACAAGAGCTACATTTATGGAAGTTCTGACAAAAATCCTTCAACAAGGCACAGAATTTGACACACTTGCAGAAACAGTATTGGCTGATCGGTTTGAGAGATTGGTGGAACTGGTCACAATGATGGGTGATC
NF1	NF1_55	chr17	29560077	29560264	ACACTGACGACATGGTTCTACAAAATCCTTCAACAAGGCACAGAA	TACGGTAGCAGAGACTTGGTCTcacttttctTCCCCGCTTACTCT	188	46	AAATCCTTCAACAAGGCACAGAATTTGACACACTTGCAGAAACAGTATTGGCTGATCGGTTTGAGAGATTGGTGGAACTGGTCACAATGATGGGTGATCAAGGAGAACTCCCTATAGCGATGGCTCTGGCCAATGTGGTTCCTTGTTCTCAGTGGGTAAGTGATTAGAGTAAGCGGGGAagaaaagtg	One primer sits in the repeat region
NF1	NF1_56	chr17	29562555	29562735	ACACTGACGACATGGTTCTACATGCTACTCTTTAGCTTCCTACCT	TACGGTAGCAGAGACTTGGTCTTGCATGGAGTCTGCCAATTCTAC	181	39	TGCTACTCTTTAGCTTCCTACCTAAGAATAAAAATGGGATTGTTTGCACTAACCTGATTTTGTTTTGTTCTCAGGATGAACTAGCTCGAGTTCTGGTTACTCTGTTTGATTCTCGGCATTTACTCTACCAACTGCTCTGGAACATGTTTTCTAAAGAAGTAGAATTGGCAGACTCCATGCA
NF1	NF1_57	chr17	29562677	29562872	ACACTGACGACATGGTTCTACACTCTACCAACTGCTCTGGAACAT	TACGGTAGCAGAGACTTGGTCTCAATCAGCCCTGCACATTCT	196	41	CTCTACCAACTGCTCTGGAACATGTTTTCTAAAGAAGTAGAATTGGCAGACTCCATGCAGACTCTCTTCCGAGGCAACAGCTTGGCCAGTAAAATAATGACATTCTGTTTCAAGGTTTGTATCATTCATTTTGTGTGTATGTGTGTGCTGAGGTATGTCAAGTAATGATTATGTACAGAATGTGCAGGGCTGATTG
NF1	NF1_58	chr17	29562876	29563069	ACACTGACGACATGGTTCTACATCTTTTAAGGTAAAATATATGGAGCAGGT	TACGGTAGCAGAGACTTGGTCTACAGCGGTTCTATGTGAAAAGATGA	194	38	TCTTTTAAGGTAAAATATATGGAGCAGGTATAATAAACTCCTATTCGTGCATTTCTGTAGGTATATGGTGCTACCTATCTACAAAAACTCCTGGATCCTTTATTACGAATTGTGATCACATCCTCTGATTGGCAACATGTTAGCTTTGAAGTGGATCCTACCAGGTTTGTCATCTTTTCACATAGAACCGCTGT
NF1	NF1_59	chr17	29575898	29576096	ACACTGACGACATGGTTCTACACGTTGCACTTGGCTTAATGTCT	TACGGTAGCAGAGACTTGGTCTATTCTGAGGAGGAACTGATGATG	199	36	CGTTGCACTTGGCTTAATGTCTGTATAAGAGTCTCTTTTAAGGAGTGATTTTTGTTATTTGTTTTAAACAAAAGTGTTAGGATTTTATTTTTATTTTTTTGTAGGTTAGAACCATCAGAGAGCCTTGAGGAAAACCAGCGGAACCTCCTTCAGATGACTGAAAAGTTCTTCCATGCCATCATCAGTTCCTCCTCAGAAT
NF1	NF1_60	chr17	29576024	29576221	ACACTGACGACATGGTTCTACAGAGGAAAACCAGCGGAACCT	TACGGTAGCAGAGACTTGGTCTTCAGCAGCTAGATCCTTCTTTGA	198	40	GAGGAAAACCAGCGGAACCTCCTTCAGATGACTGAAAAGTTCTTCCATGCCATCATCAGTTCCTCCTCAGAATTCCCCCCTCAACTTCGAAGTGTGTGCCACTGTTTATACCAGGTATGCTTACAGTTAGAGATTACCATTATTAATCTAAAGTTAAATTATGAAGAATGCTTTATCAAAGAAGGATCTAGCTGCTGA
NF1	NF1_61	chr17	29579884	29580055	ACACTGACGACATGGTTCTACACAAGCCAACATTGTTTTTGTTGC	TACGGTAGCAGAGACTTGGTCTTGAAAGAAACAGCTAATAAAAAGTTCTCCA	172	37	CAAGCCAACATTGTTTTTGTTGCTGTATGTAGTCGGTGCTGTGACTTGTTTGTGCTCATCTCTGTTCTGTAGGCAACTTGCCACTCCCTACTGAATAAAGCTACAGTAAAAGAAAAAAAGGAAAACAAAAAATCAGTAAGTTTGGAGAACTTTTTATTAGCTGTTTCTTTCA
NF1	NF1_62	chr17	29585280	29585450	ACACTGACGACATGGTTCTACAAAGTTTGACCTTTGAACTCTTTGTTT	TACGGTAGCAGAGACTTGGTCTGGTGAGACAATGGCAGGATTGAT	171	40	AAGTTTGACCTTTGAACTCTTTGTTTTCATGTCTTTATATTAATTCAAACCTTATACTCAATTCTCAACTCCTTGTTTTTAGGTGGTTAGCCAGCGTTTCCCTCAGAACAGCATCGGTGCAGTAGGAAGTGCCATGTTCCTCAGATTTATCAATCCTGCCATTGTCTCACC
NF1	NF1_63	chr17	29585390	29585577	ACACTGACGACATGGTTCTACAGCATCGGTGCAGTAGGAAGTG	TACGGTAGCAGAGACTTGGTCTGCTGAAAATTTAGTTGGAAGGGGAA	188	40	GCATCGGTGCAGTAGGAAGTGCCATGTTCCTCAGATTTATCAATCCTGCCATTGTCTCACCGTATGAAGCAGGGATTTTAGATAAAAAGCCACCACCTAGAATCGAAAGGGGCTTGAAGTTAATGTCAAAGGTGAATTATTTTGATAATCTAGCTATCTTAAATTCCCCTTCCAACTAAATTTTCAGC
NF1	NF1_64	chr17	29586017	29586176	ACACTGACGACATGGTTCTACATCTGATTATTTATAACCCTGTTTTATTGTGT	TACGGTAGCAGAGACTTGGTCTAGCAACTGAGTAAGTGGCAAGAA	160	36	TCTGATTATTTATAACCCTGTTTTATTGTGTAGATACTTCAGAGTATTGCCAATCATGTTCTCTTCACAAAAGAAGAACATATGCGGCCTTTCAATGATTTTGTGAAAAGCAACTTTGATGCAGCACGCAGGTAATTTTCTTGCCACTTACTCAGTTGCT
NF1	NF1_65	chr17	29587264	29587462	ACACTGACGACATGGTTCTACATGAACAAGCCCTCCATATTTGTAA	TACGGTAGCAGAGACTTGGTCTGCCGTCACTTATGAAGGAAAGAC	199	33	TGAACAAGCCCTCCATATTTGTAATCTTAGTTACTTCACAAAGTTACTTCTTATAAATTTAATTCAAACATAAGTCTGGGTGTATCTGGTGTTGAAAATTCTAATGACTTTGCATTTTTGAAGGTTTTTCCTTGATATAGCATCTGATTGTCCTACAAGTGATGCAGTAAATCATAGTCTTTCCTTCATAAGTGACGGC
NF1	NF1_66	chr17	29587370	29587545	ACACTGACGACATGGTTCTACAACTTTGCATTTTTGAAGGTTTTTCCT	TACGGTAGCAGAGACTTGGTCTGGGAAATCTTACCTGTTGCTGGA	176	39	ACTTTGCATTTTTGAAGGTTTTTCCTTGATATAGCATCTGATTGTCCTACAAGTGATGCAGTAAATCATAGTCTTTCCTTCATAAGTGACGGCAATGTGCTTGCTTTACATCGTCTACTCTGGAACAATCAGGAGAAAATTGGGCAGTATCTTTCCAGCAACAGGTAAGATTTCCC
NF1	NF1_67	chr17	29587445	29587642	ACACTGACGACATGGTTCTACATCCTTCATAAGTGACGGCAATGT	TACGGTAGCAGAGACTTGGTCTTCTTAGTCCAAGAAGATGCAAAGT	198	38	TCCTTCATAAGTGACGGCAATGTGCTTGCTTTACATCGTCTACTCTGGAACAATCAGGAGAAAATTGGGCAGTATCTTTCCAGCAACAGGTAAGATTTCCCAGTCATGGGGATAGTGAACACTCTCCGTTTAAATTTAGATTAATACAATTATTGGTCATGAATAGTGCTTTTTACTTTGCATCTTCTTGGACTAAGA
NF1	NF1_68	chr17	29588628	29588826	ACACTGACGACATGGTTCTACAAGCTGACAGTAAAAGGAAAAGCA	TACGGTAGCAGAGACTTGGTCTAGTGTGTATCTGCCACAGGTTTG	199	40	AGCTGACAGTAAAAGGAAAAGCAACCAGTTACAAGTTAAAGAAATGTGTAGTGCTAAATGTGAACTGCTAATTTTTTTTCTAAGTAGTTTGCTGTATCTAGGGATCATAAAGCTGTTGGAAGACGACCTTTTGATAAGATGGCAACACTTCTTGCATACCTGGGTCCTCCAGAGCACAAACCTGTGGCAGATACACACT
NF1	NF1_69	chr17	29588751	29588940	ACACTGACGACATGGTTCTACACGACCTTTTGATAAGATGGCAACA	TACGGTAGCAGAGACTTGGTCTCTGGTGGCAAACTCTCCTTCTC	190	43	CGACCTTTTGATAAGATGGCAACACTTCTTGCATACCTGGGTCCTCCAGAGCACAAACCTGTGGCAGATACACACTGGTCCAGCCTTAACCTTACCAGTTCAAAGTTTGAGGAATTTATGACTAGGTAAAGTACAACCTTGAAATAGTTGATTGCTTTCTTTTTGGTTGAGAAGGAGAGTTTGCCACCAG
NF1	NF1_70	chr17	29592196	29592379	ACACTGACGACATGGTTCTACAACTCAGTAGACAACATAAAGCCTCA	TACGGTAGCAGAGACTTGGTCTCCCAAAACATAGTATTTCTTACCTCCG	184	35	ACTCAGTAGACAACATAAAGCCTCATAATTACTCTGTTATTTTTCTTTTAGGCATCAGGTACATGAAAAAGAAGAATTCAAGGCTTTGAAAACGTTAAGTATTTTCTACCAAGCTGGGACTTCCAAAGCTGGGAATCCTATTTTTTATTATGTTGCACGGAGGTAAGAAATACTATGTTTTGGG
NF1	NF1_71	chr17	29592252	29592443	ACACTGACGACATGGTTCTACAAGGTACATGAAAAAGAAGAATTCAAGG	TACGGTAGCAGAGACTTGGTCTCTGGGAAAAACCAAACTTGCCAT	192	34	AGGTACATGAAAAAGAAGAATTCAAGGCTTTGAAAACGTTAAGTATTTTCTACCAAGCTGGGACTTCCAAAGCTGGGAATCCTATTTTTTATTATGTTGCACGGAGGTAAGAAATACTATGTTTTGGGTCTCTTAACAGAATTTTTTAAATTATAGCAAATATAGAGAGATGGCAAGTTTGGTTTTTCCCAG
NF1	NF1_72	chr17	29652754	29652950	ACACTGACGACATGGTTCTACACATAAAATAAAATTGATTAGTGGCATCTGT	TACGGTAGCAGAGACTTGGTCTGCCCGGTATGGGTAAGGTC	197	32	CATAAAATAAAATTGATTAGTGGCATCTGTATATTTATTTTAAACACTGCTAATAATCTTTGTCTTTTTTGTCATTTTCCTTAGGTTCAAAACTGGTCAAATCAATGGTGATTTGCTGATATACCATGTCTTACTGACTTTAAAGCCATATTATGCAAAGCCATATGAAATTGTAGTGGACCTTACCCATACCGGGC
NF1	NF1_73	chr17	29652840	29653016	ACACTGACGACATGGTTCTACATCAAAACTGGTCAAATCAATGGTG	TACGGTAGCAGAGACTTGGTCTCGTAAGCAAAGCCAGGAAAAACA	177	39	TCAAAACTGGTCAAATCAATGGTGATTTGCTGATATACCATGTCTTACTGACTTTAAAGCCATATTATGCAAAGCCATATGAAATTGTAGTGGACCTTACCCATACCGGGCCTAGCAATCGCTTTAAAACAGACTTTCTCTCTAAGTGGTTTGTTGTTTTTCCTGGCTTTGCTTACG
NF1	NF1_74	chr17	29652934	29653122	ACACTGACGACATGGTTCTACACCTTACCCATACCGGGCCTA	TACGGTAGCAGAGACTTGGTCTACAAGCCTTTTGCTACCTTTGAG	189	47	CCTTACCCATACCGGGCCTAGCAATCGCTTTAAAACAGACTTTCTCTCTAAGTGGTTTGTTGTTTTTCCTGGCTTTGCTTACGACAACGTCTCCGCAGTCTATATCTATAACTGTAACTCCTGGGTCAGGGAGTACACCAAGTATCATGAGCGGCTGCTGACTGGCCTCAAAGGTAGCAAAAGGCTTGT
NF1	NF1_75	chr17	29653017	29653213	ACACTGACGACATGGTTCTACAACAACGTCTCCGCAGTCTATATC	TACGGTAGCAGAGACTTGGTCTCAGGTCCTCTTCTAAAGCCAAGG	197	49	ACAACGTCTCCGCAGTCTATATCTATAACTGTAACTCCTGGGTCAGGGAGTACACCAAGTATCATGAGCGGCTGCTGACTGGCCTCAAAGGTAGCAAAAGGCTTGTTTTCATAGACTGTCCTGGGAAACTGGCTGAGCACATAGAGCATGAACAACAGAAACTACCTGCTGCCACCTTGGCTTTAGAAGAGGACCTG
NF1	NF1_76	chr17	29653125	29653322	ACACTGACGACATGGTTCTACATCATAGACTGTCCTGGGAAACTG	TACGGTAGCAGAGACTTGGTCTAGTTAGTCAAGAAAAGCAATGAATCG	198	42	TCATAGACTGTCCTGGGAAACTGGCTGAGCACATAGAGCATGAACAACAGAAACTACCTGCTGCCACCTTGGCTTTAGAAGAGGACCTGAAGGTATTCCACAATGCTCTCAAGCTAGCTCACAAAGACACCAAAGTTTCTATTAAAGTAAGTTCCAGTCTGTGTTTTGTAAACGATTCATTGCTTTTCTTGACTAACT
NF1	NF1_77	chr17	29654434	29654629	ACACTGACGACATGGTTCTACATGGTTGGTTTCTGGAGCCTTTTA	TACGGTAGCAGAGACTTGGTCTACTAGGCAGATTTCTTCAATTTCCG	196	40	TGGTTGGTTTCTGGAGCCTTTTAGAATTTTATGTAAAAGAGTTTAATTCTTCTCCACTTCACCCCGTCACCACCACTTTCCAGGTTGGTTCTACTGCTGTCCAAGTAACTTCAGCAGAGCGAACAAAAGTCCTAGGGCAATCAGTCTTTCTAAATGACATTTATTATGCTTCGGAAATTGAAGAAATCTGCCTAGT
NF1	NF1_78	chr17	29654542	29654737	ACACTGACGACATGGTTCTACACTTCAGCAGAGCGAACAAAAGTC	TACGGTAGCAGAGACTTGGTCTCGGGTCCGGATATGAATGATAGA	196	46	CTTCAGCAGAGCGAACAAAAGTCCTAGGGCAATCAGTCTTTCTAAATGACATTTATTATGCTTCGGAAATTGAAGAAATCTGCCTAGTAGATGAGAACCAGTTCACCTTAACCATTGCAAACCAGGGCACGCCGCTCACCTTCATGCACCAGGAGTGTGAAGCCATTGTCCAGTCTATCATTCATATCCGGACCCG
NF1	NF1_79	chr17	29654620	29654800	ACACTGACGACATGGTTCTACATCTGCCTAGTAGATGAGAACCAGT	TACGGTAGCAGAGACTTGGTCTGGGACATCTTTTGGCCGAATCTT	181	53	TCTGCCTAGTAGATGAGAACCAGTTCACCTTAACCATTGCAAACCAGGGCACGCCGCTCACCTTCATGCACCAGGAGTGTGAAGCCATTGTCCAGTCTATCATTCATATCCGGACCCGCTGGGAACTGTCACAGCCCGACTCTATCCCCCAACACACCAAGATTCGGCCAAAAGATGTCCC
NF1	NF1_80	chr17	29654713	29654903	ACACTGACGACATGGTTCTACAAGTCTATCATTCATATCCGGACCC	TACGGTAGCAGAGACTTGGTCTAGCAACAAACCCCAAATCAAACT	191	46	AGTCTATCATTCATATCCGGACCCGCTGGGAACTGTCACAGCCCGACTCTATCCCCCAACACACCAAGATTCGGCCAAAAGATGTCCCTGGGACACTGCTCAATATCGCATTACTTAATTTAGGCAGTTCTGACCCGAGTTTACGGTAGGTTTTTTAAAATTCTCTTCAGTTTGATTTGGGGTTTGTTGCT
NF1	NF1_81	chr17	29657224	29657419	ACACTGACGACATGGTTCTACAAACAGAATCACAAATTGTATGTTATGAAAAA	TACGGTAGCAGAGACTTGGTCTGGTGTTGTTGGCAGGGATACATA	196	34	AACAGAATCACAAATTGTATGTTATGAAAAAATTTTGGAACTATAAGGAAAAATACGTTTTAAAACAACTTCATTTGTGTTTTCTCCTAGGTCAGCTGCCTATAATCTTCTGTGTGCCTTAACTTGTACCTTTAATTTAAAAATCGAGGGCCAGTTACTAGAGACATCAGGTTTATGTATCCCTGCCAACAACACC
NF1	NF1_82	chr17	29657318	29657510	ACACTGACGACATGGTTCTACAGCTGCCTATAATCTTCTGTGTGC	TACGGTAGCAGAGACTTGGTCTTGCTAAATCCAGAAATACACTCTTCCA	193	40	GCTGCCTATAATCTTCTGTGTGCCTTAACTTGTACCTTTAATTTAAAAATCGAGGGCCAGTTACTAGAGACATCAGGTTTATGTATCCCTGCCAACAACACCCTCTTTATTGTCTCTATTAGTAAGACACTGGCAGCCAATGAGCCACACCTCACGTTAGAATTTTTGGAAGAGTGTATTTCTGGATTTAGCA
NF1	NF1_83	chr17	29657390	29657588	ACACTGACGACATGGTTCTACATCAGGTTTATGTATCCCTGCCAA	TACGGTAGCAGAGACTTGGTCTCTGAAATGAAAGGGTTTTCTTTGAATTCTC	199	34	TCAGGTTTATGTATCCCTGCCAACAACACCCTCTTTATTGTCTCTATTAGTAAGACACTGGCAGCCAATGAGCCACACCTCACGTTAGAATTTTTGGAAGAGTGTATTTCTGGATTTAGCAAATCTAGTAAGTAATGATAATTTTCTTTAATACTAACAATTATTCTAAGAGAATTCAAAGAAAACCCTTTCATTTCAG
NF1	NF1_84	chr17	29661768	29661939	ACACTGACGACATGGTTCTACAACCATTTTTTCCCCGAATTCTTTATGT	TACGGTAGCAGAGACTTGGTCTCATCATCATTATGCTTGCAAAAACG	172	33	ACCATTTTTTCCCCGAATTCTTTATGTTAAATAATTGTTGATGTGATTTTCATTGACCATCACATGCTAATAGTGTATTTTTTTCCAGGTATTGAATTGAAACACCTTTGTTTGGAATACATGACTCCATGGCTGTCAAATCTAGTTCGTTTTTGCAAGCATAATGATGATG
NF1	NF1_85	chr17	29661869	29662042	ACACTGACGACATGGTTCTACAACACCTTTGTTTGGAATACATGACT	TACGGTAGCAGAGACTTGGTCTAGGCTTCCCCATATTTTTGCTTG	174	38	ACACCTTTGTTTGGAATACATGACTCCATGGCTGTCAAATCTAGTTCGTTTTTGCAAGCATAATGATGATGCCAAACGACAAAGAGTTACTGCTATTCTTGACAAGCTGATAACAATGACCATCAATGAAAAACAGATGTACCCATCTATTCAAGCAAAAATATGGGGAAGCCT
NF1	NF1_86	chr17	29661968	29662147	ACACTGACGACATGGTTCTACATGACAAGCTGATAACAATGACCA	TACGGTAGCAGAGACTTGGTCTCTATCCCTAGTGTCTAGCGCAGT	180	41	TGACAAGCTGATAACAATGACCATCAATGAAAAACAGATGTACCCATCTATTCAAGCAAAAATATGGGGAAGCCTTGGGCAGGTATTGAGTTTGCTCAAATATTTATCTAGTATCTCCTTTGTGcacatatttatctggtgccacattgggcaaagcactgcgctagacactagggatag	One primer sits in the repeat region
NF1	NF1_123	chr17	29663263	29663443	ACACTGACGACATGGTTCTACATTGATTAGGCTGTTCCAATGAA	TACGGTAGCAGAGACTTGGTCTATCTGCCATCACCTCAGCTT	181	33	TTGATTAGGCTGTTCCAATGAATATTTTTTAATTAAAAATTAAATTGGTAGAGTGATTAAAAACATGTTATTTTCCTTCTTCAACTAGATTACAGATCTGCTTGATGTTGTACTAGACAGTTTCATCAAAACCAGTGCAACAGGTGGCTTGGGATCAATAAAAGCTGAGGTGATGGCAGAT
NF1	NF1_87	chr17	29663325	29663495	ACACTGACGACATGGTTCTACAACATGTTATTTTCCTTCTTCAACTAGATTACA	TACGGTAGCAGAGACTTGGTCTTTACCTTGCTTGAAACCAATTTCACATTTC	171	40	ACATGTTATTTTCCTTCTTCAACTAGATTACAGATCTGCTTGATGTTGTACTAGACAGTTTCATCAAAACCAGTGCAACAGGTGGCTTGGGATCAATAAAAGCTGAGGTGATGGCAGATACTGCTGTAGCTTTGGCTTCTGGAAATGTGAAATTGGTTTCAAGCAAGGTAA
NF1	NF1_88	chr17	29663423	29663611	ACACTGACGACATGGTTCTACAAAAGCTGAGGTGATGGCAGATAC	TACGGTAGCAGAGACTTGGTCTGGGACTCAAAGTTTTAGCACAAAAAAG	189	34	AAAGCTGAGGTGATGGCAGATACTGCTGTAGCTTTGGCTTCTGGAAATGTGAAATTGGTTTCAAGCAAGGTAATCACTTTTCTTTTGCCTTCTGTACTATAGCATATCTGTTTTATCATCAGGAGGTTTTTTGTTTTGTAATTACTTTTAAATTAAACTGAACTTTTTTGTGCTAAAACTTTGAGTCCC
NF1	NF1_89	chr17	29663574	29663764	ACACTGACGACATGGTTCTACAATTAAACTGAACTTTTTTGTGCTAAAACT	TACGGTAGCAGAGACTTGGTCTTCAGCATGTAGCGTGCTAAAATA	191	32	ATTAAACTGAACTTTTTTGTGCTAAAACTTTGAGTCCCATGtttttttttttaaaaaaaaaaatCCTGCTTCTTTACAGGTTATTGGAAGGATGTGCAAAATAATTGACAAGACATGCTTATCTCCAACTCCTACTTTAGAACAACATCTTATGTGGGATGATATTGCTATTTTAGCACGCTACATGCTGA
NF1	NF1_90	chr17	29663666	29663863	ACACTGACGACATGGTTCTACATGTGCAAAATAATTGACAAGACATGC	TACGGTAGCAGAGACTTGGTCTCTCTAAGGGAGAGCGGACCTG	198	43	TGTGCAAAATAATTGACAAGACATGCTTATCTCCAACTCCTACTTTAGAACAACATCTTATGTGGGATGATATTGCTATTTTAGCACGCTACATGCTGATGCTGTCCTTCAACAATTCCCTTGATGTGGCAGCTCATCTTCCCTACCTCTTCCACGTTGTTACTTTCTTAGTAGCCACAGGTCCGCTCTCCCTTAGAG
NF1	NF1_91	chr17	29663784	29663977	ACACTGACGACATGGTTCTACACCTTGATGTGGCAGCTCATCTT	TACGGTAGCAGAGACTTGGTCTTGGAGAAAGGAACTGGTAAACACA	194	44	CCTTGATGTGGCAGCTCATCTTCCCTACCTCTTCCACGTTGTTACTTTCTTAGTAGCCACAGGTCCGCTCTCCCTTAGAGCTTCCACACATGGACTGGTCATTAATATCATTCACTCTCTGTGTACTTGTTCACAGCTTCATTTTAGTGGTAAGTTCTAGGAAAGGAATTTGTGTTTACCAGTTCCTTTCTCCA
NF1	NF1_92	chr17	29664300	29664485	ACACTGACGACATGGTTCTACATTTTCTAAATTCAAAATGAAACATGGAACT	TACGGTAGCAGAGACTTGGTCTATGACAGCAGCTGACTTGACTTT	186	33	TTTTCTAAATTCAAAATGAAACATGGAACTTTAGAAATTAAAAAGTAATATTTTCTGTCTTTACTTGTTCCTTTATTCTCTTACAGAAGAGACCAAGCAAGTTTTGAGACTCAGTCTGACAGAGTTCTCATTACCCAAATTTTACTTGCTGTTTGGCATTAGCAAAGTCAAGTCAGCTGCTGTCAT
NF1	NF1_93	chr17	29664384	29664582	ACACTGACGACATGGTTCTACAAGAAGAGACCAAGCAAGTTTTGA	TACGGTAGCAGAGACTTGGTCTAGCTTCTGTGACTGTTTCCAAGG	199	45	AGAAGAGACCAAGCAAGTTTTGAGACTCAGTCTGACAGAGTTCTCATTACCCAAATTTTACTTGCTGTTTGGCATTAGCAAAGTCAAGTCAGCTGCTGTCATTGCCTTCCGTTCCAGTTACCGGGACAGGTCATTCTCTCCTGGCTCCTATGAGAGAGAGACTTTTGCTTTGACATCCTTGGAAACAGTCACAGAAGCT
NF1	NF1_94	chr17	29664454	29664636	ACACTGACGACATGGTTCTACAGGCATTAGCAAAGTCAAGTCAGC	TACGGTAGCAGAGACTTGGTCTTTTTAACTTAGTTTCTTATCATTTTGGCTTC	183	44	GGCATTAGCAAAGTCAAGTCAGCTGCTGTCATTGCCTTCCGTTCCAGTTACCGGGACAGGTCATTCTCTCCTGGCTCCTATGAGAGAGAGACTTTTGCTTTGACATCCTTGGAAACAGTCACAGAAGCTTTGTTGGAGATCATGGAGGTATAGAAGCCAAAATGATAAGAAACTAAGTTAAAA
NF1	NF1_95	chr17	29664727	29664907	ACACTGACGACATGGTTCTACATGGACTGTGTTATTGGTAACAGG	TACGGTAGCAGAGACTTGGTCTAGGACATACCTTTGAGCTAGTTCTG	181	36	TGGACTGTGTTATTGGTAACAGGTCACTTAATGACATCATAATAAACATTATTTAAACAGTTCTAAAAACATTTATGTACAATATGTATTCAGAGTATCCCCTTTTTTAGGCATGCATGAGAGATATTCCAACGTGCAAGTGGCTGGACCAGTGGACAGAACTAGCTCAAAGGTATGTCCT
NF1	NF1_96	chr17	29664859	29665034	ACACTGACGACATGGTTCTACACGTGCAAGTGGCTGGAC	TACGGTAGCAGAGACTTGGTCTAAAAGATCCACAGAACTTATAAAAACCT	176	29	CGTGCAAGTGGCTGGACCAGTGGACAGAACTAGCTCAAAGGTATGTCCTAAATTAAATATAAGTTGTAAAAATATGCATATTGTTGAAAATACAGCTATTACTGTATGATCAATGttataatttattatttagtatatataaaCACAAAGGTTTTTATAAGTTCTGTGGATCTTTT
NF1	NF1_97	chr17	29665006	29665178	ACACTGACGACATGGTTCTACAAAGGTTTTTATAAGTTCTGTGGATCTTT	TACGGTAGCAGAGACTTGGTCTAAGTGAGGGCGGAACAGG	173	40	AAGGTTTTTATAAGTTCTGTGGATCTTTTAATTGCAGATTTGCATTCCAATATAATCCATCCCTGCAACCAAGAGCTCTTGTTGTCTTTGGGTGTATTAGCAAACGAGTGTCTCATGGGCAGATAAAGCAGATAATCCGTATTCTTAGCAAGGTACCTGTTCCGCCCTCACTT
NF1	NF1_98	chr17	29665647	29665817	ACACTGACGACATGGTTCTACACATTCCGAGATTCAGTTTAGGAGTTA	TACGGTAGCAGAGACTTGGTCTAAGAAGTGGCTGTAATTTGGTTAGT	171	33	CATTCCGAGATTCAGTTTAGGAGTTAATGTTTTATTTCAATGAAAGTAAAATAAAAAATTCTGTTTTCCTAAAAGGCACTTGAGAGTTGCTTAAAAGGACCTGACACTTACAACAGTCAAGTTCTGATAGAAGCTACAGTAATAGCACTAACCAAATTACAGCCACTTCTT
NF1	NF1_99	chr17	29665706	29665881	ACACTGACGACATGGTTCTACATCTGTTTTCCTAAAAGGCACTTGA	TACGGTAGCAGAGACTTGGTCTAGTAACATTCAACACTGATACCCA	176	35	TCTGTTTTCCTAAAAGGCACTTGAGAGTTGCTTAAAAGGACCTGACACTTACAACAGTCAAGTTCTGATAGAAGCTACAGTAATAGCACTAACCAAATTACAGCCACTTCTTAATAAGGTAATTACTGTATAGAAAATGAGTGCATTCATTTTGGGTATCAGTGTTGAATGTTACT
NF1	NF1_100	chr17	29667415	29667613	ACACTGACGACATGGTTCTACACATGGGTAATTTAGGAAGATAAGCTG	TACGGTAGCAGAGACTTGGTCTGAAGTGCGGTACCTGCTGAA	199	44	CATGGGTAATTTAGGAAGATAAGCTGCTTTATTTTTAACTGCAGTGTGTTTTGAAAGAGACTATGTCATGATTCATCTTACTAGCCTCAAACATATCTTCTTTGCCAGGACTCGCCTCTGCACAAAGCCCTCTTTTGGGTAGCTGTGGCTGTGCTGCAGCTTGATGAGGTCAACTTGTATTCAGCAGGTACCGCACTTC
NF1	NF1_101	chr17	29667505	29667694	ACACTGACGACATGGTTCTACAACATATCTTCTTTGCCAGGACTCG	TACGGTAGCAGAGACTTGGTCTATCTAGGAACCTCAAGGCAAAGT	190	45	ACATATCTTCTTTGCCAGGACTCGCCTCTGCACAAAGCCCTCTTTTGGGTAGCTGTGGCTGTGCTGCAGCTTGATGAGGTCAACTTGTATTCAGCAGGTACCGCACTTCTTGAACAAAACCTGCATACTTTAGATAGTCTCCGTATATTCAATGACAAGGTAAGCAAACTTTGCCTTGAGGTTCCTAGAT
NF1	NF1_102	chr17	29669974	29670147	ACACTGACGACATGGTTCTACAAAAGAAAGCTACTGTGTGAACCT	TACGGTAGCAGAGACTTGGTCTAAAGGTGTCCAACCAATGCAAAG	174	39	AAAGAAAGCTACTGTGTGAACCTCATCAACCATCTCATGATTATCTTTAATAGAGTCCAGAGGAAGTATTTATGGCAATCCGGAATCCTCTGGAGTGGCACTGCAAGCAAATGGATCATTTTGTTGGACTCAATTTCAACTCTAACTTTAACTTTGCATTGGTTGGACACCTTT
NF1	NF1_103	chr17	29670043	29670223	ACACTGACGACATGGTTCTACATTATGGCAATCCGGAATCCTCTG	TACGGTAGCAGAGACTTGGTCTTCACTTATTCAAATTACTTCTGGTTTCTT	181	33	TTATGGCAATCCGGAATCCTCTGGAGTGGCACTGCAAGCAAATGGATCATTTTGTTGGACTCAATTTCAACTCTAACTTTAACTTTGCATTGGTTGGACACCTTTTAAAAGGTAAAAAAGCCTTATTTAGAATATTTTTATGAAGTACTATTAAGAAACCAGAAGTAATTTGAATAAGTGA
NF1	NF1_104	chr17	29676064	29676258	ACACTGACGACATGGTTCTACAGAAGACCTCAGCAGATGCTTGTT	TACGGTAGCAGAGACTTGGTCTGCCACGCTCTGTGTATTCACTTC	195	36	GAAGACCTCAGCAGATGCTTGTTCAAAAAATTAATTCTTACttgtttgtttgtttgtttgtttgttttttgtAGGGTACAGGCATCCTTCACCTGCTATTGTTGCAAGAACAGTCAGAATTTTACATACACTACTAACTCTGGTTAACAAACACAGAAATTGTGACAAATTTGAAGTGAATACACAGAGCGTGGC
NF1	NF1_105	chr17	29676145	29676343	ACACTGACGACATGGTTCTACAGCATCCTTCACCTGCTATTGTTG	TACGGTAGCAGAGACTTGGTCTAGGTATTTGTACTTTTTGGGTGATCCT	199	34	GCATCCTTCACCTGCTATTGTTGCAAGAACAGTCAGAATTTTACATACACTACTAACTCTGGTTAACAAACACAGAAATTGTGACAAATTTGAAGTGAATACACAGAGCGTGGCCTACTTAGCAGGTAAAAACACAAAATAAACAAAATTAATCTTGCTACATCTATATATAAGGATCACCCAAAAAGTACAAATACCT
NF1	NF1_106	chr17	29677090	29677285	ACACTGACGACATGGTTCTACATGCACATTTAACAGGTACTATGCTCT	TACGGTAGCAGAGACTTGGTCTTCCATTGAAATATCAGTAAGAAGAAGTGA	196	36	TGCACATTTAACAGGTACTATGCTCTTTAGGAGACTGTAAGAAGTTCATCCTGTTTTAAGTCACACTTGTGATTTGTTAAATTTTTTAACCTGCCACCGTTTTCCTTTTAGCTTTACTTACAGTGTCTGAAGAAGTTCGAAGTCGCTGCAGCCTAAAACATAGAAAGTCACTTCTTCTTACTGATATTTCAATGGA
NF1	NF1_107	chr17	29677182	29677371	ACACTGACGACATGGTTCTACAGCCACCGTTTTCCTTTTAGCTTT	TACGGTAGCAGAGACTTGGTCTTGATTATGTAATTATAGGAGAGTAAATCCACTT	190	37	GCCACCGTTTTCCTTTTAGCTTTACTTACAGTGTCTGAAGAAGTTCGAAGTCGCTGCAGCCTAAAACATAGAAAGTCACTTCTTCTTACTGATATTTCAATGGAAAATGTTCCTATGGATACATATCCCATTCATCATGGTGACCCTTCCTATAGGTAAGTGGATTTACTCTCCTATAATTACATAATCA
NF1	NF1_108	chr17	29679206	29679396	ACACTGACGACATGGTTCTACAGAAGGAGCAAACGATGGTTGTAT	TACGGTAGCAGAGACTTGGTCTCCATGTCCAGGCTCATGGATT	191	47	GAAGGAGCAAACGATGGTTGTATTTGTCACCATATTAATTGATTTTTCTCTATTGTTTTCATCTTTCAGGACACTAAAGGAGACTCAGCCATGGTCCTCTCCCAAAGGTTCTGAAGGATACCTTGCAGCCACCTATCCAACTGTCGGCCAGACCAGTCCCCGAGCCAGGAAATCCATGAGCCTGGACATGG
NF1	NF1_109	chr17	29679254	29679411	ACACTGACGACATGGTTCTACATCTATTGTTTTCATCTTTCAGGACACT	TACGGTAGCAGAGACTTGGTCTCCTGAGAAGGTTGCCCCAT	158	53	TCTATTGTTTTCATCTTTCAGGACACTAAAGGAGACTCAGCCATGGTCCTCTCCCAAAGGTTCTGAAGGATACCTTGCAGCCACCTATCCAACTGTCGGCCAGACCAGTCCCCGAGCCAGGAAATCCATGAGCCTGGACATGGGGCAACCTTCTCAGG
NF1	NF1_110	chr17	29679387	29679563	ACACTGACGACATGGTTCTACACTGGACATGGGGCAACCTTC	TACGGTAGCAGAGACTTGGTCTTGGCATCAAAAACTTTGCTACACT	177	29	CTGGACATGGGGCAACCTTCTCAGGCCAACACTAAGAAGTTGCTTGGTTAGTTTATCTAAATTATGTAGattttttttattatttaaaaaaatagatatttttaCTCTTGGAAAATTATTTGAAATTTCAGGATTATCAAAATTTTCCATGTCAGTGTAGCAAAGTTTTTGATGCCA
NF1	NF1_111	chr17	29683366	29683560	ACACTGACGACATGGTTCTACAAGTCCTCAGTGAAAGCTTAAACAC	TACGGTAGCAGAGACTTGGTCTGGGTGTTGTGATCCCTGATTCC	195	34	AGTCCTCAGTGAAAGCTTAAACACTTTATGTCCAAACATTTTCTTTTTAGTGTATTCCCATTTATAGACACTGTAGTTAATGAACTTGCATATTCTTAACTTTTGTTTATAGGAACAAGGAAAAGTTTTGATCACTTGATATCAGACACAAAGGCTCCTAAAAGGCAAGAAATGGAATCAGGGATCACAACACCC
NF1	NF1_112	chr17	29683511	29683683	ACACTGACGACATGGTTCTACAACACAAAGGCTCCTAAAAGGCAA	TACGGTAGCAGAGACTTGGTCTAGAAATGGCTGGAAAATAAACATGACT	173	39	ACACAAAGGCTCCTAAAAGGCAAGAAATGGAATCAGGGATCACAACACCCCCCAAAATGAGGAGAGTAGCAGAAACTGATTATGAAATGGGTGAGAAACAAAGTATTGATCTAGATCATTGAAAATAAGGTGGGAGAGTACATGAAAGTCATGTTTATTTTCCAGCCATTTCT
NF1	NF1_113	chr17	29683941	29684135	ACACTGACGACATGGTTCTACAAGGTGTTTGATCACGTTAATTCCCTA	TACGGTAGCAGAGACTTGGTCTGGGGACTCAAAAAGGGGAAATC	195	43	AGGTGTTTGATCACGTTAATTCCCTATCTTGCTGCAGAAACTCAGAGGATTTCCTCATCACAACAGCACCCACATTTACGTAAAGTTTCAGTGTCTGAATCAAATGTTCTCTTGGATGAAGAAGTACTTACTGATCCGAAGATCCAGGCGCTGCTTCTTACTGTTCTAGTAAGGATTTCCCCTTTTTGAGTCCCC
NF1	NF1_114	chr17	29684231	29684428	ACACTGACGACATGGTTCTACAAACAATTCAGCCACAAAGTAAAAATG	TACGGTAGCAGAGACTTGGTCTACAGGCACGAAGGTGAATTAAAA	198	37	AACAATTCAGCCACAAAGTAAAAATGTTGTGTGTTTACTTTTTTGCATCTTGGCAGGCTACACTGGTAAAATATACCACAGATGAGTTTGATCAACGAATTCTTTATGAATACTTAGCAGAGGCCAGTGTTGTGTTTCCCAAAGTCTTTCCTGTTGTGTAAGTATCTCCTTTTGATTTTAATTCACCTTCGTGCCTGT
NF1	NF1_115	chr17	29685395	29685593	ACACTGACGACATGGTTCTACATTTTGGCACATTATTCTGGGGAA	TACGGTAGCAGAGACTTGGTCTACCACACTCTGCACAATTCCAT	199	33	TTTTGGCACATTATTCTGGGGAATGTATATTATGTTTTCCACTACATATTTTCATTTAATTTTCCTCTAAAATGTTCCTCTGTTGACTTTTTTTTTCTTTTAGGCATAATTTGTTGGACTCTAAGATCAACACCCTGTTATCATTGTGCCAAGATCCAAATTTGTTAAATCCAATCCATGGAATTGTGCAGAGTGTGGT
NF1	NF1_116	chr17	29685509	29685689	ACACTGACGACATGGTTCTACATGGACTCTAAGATCAACACCCTG	TACGGTAGCAGAGACTTGGTCTGCATGTTAGCAAGTTCATCAACCA	181	40	TGGACTCTAAGATCAACACCCTGTTATCATTGTGCCAAGATCCAAATTTGTTAAATCCAATCCATGGAATTGTGCAGAGTGTGGTGTACCATGAAGAATCCCCACCACAATACCAAACATCTTACCTGCAAAGTAAATAAATGTATCTGGAGAAGGATGGTTGATGAACTTGCTAACATGC
NF1	NF1_117	chr17	29685929	29686127	ACACTGACGACATGGTTCTACATCTGTTACAATTAAAAGATACCTTGCTT	TACGGTAGCAGAGACTTGGTCTGTTTTCAGCACATTGTGTGTTCTT	199	33	TCTGTTACAATTAAAAGATACCTTGCTTGTTATAAGAGTAAAATTTGATTTGTTGCAGGTTTTGGTTTTAATGGCTTGTGGCGGTTTGCAGGACCGTTTTCAAAGGTAAGAAAATATATTTTTCTCTAACTTTTGGCAAAATGAAGGTTTCTGTTCAAATTAGTATGCCTGCTTTAAGAACACACAATGTGCTGAAAAC
NF1	NF1_118	chr17	29687441	29687612	ACACTGACGACATGGTTCTACATGGCTTCAGATGGGGATTTACTT	TACGGTAGCAGAGACTTGGTCTCAGGAGGGATTCTTCACTGGTTT	172	37	TGGCTTCAGATGGGGATTTACTTAAAAAAAAGGAACTAAAATAATTTCCTATTTTCCATTACAGCAAACACAAATTCCAGACTATGCTGAGCTTATTGTTAAGTTTCTTGATGCCTTGATTGACACGTACCTGCCTGGAATTGATGAAGAAACCAGTGAAGAATCCCTCCTG
NF1	NF1_119	chr17	29687495	29687671	ACACTGACGACATGGTTCTACATCCATTACAGCAAACACAAATTCCA	TACGGTAGCAGAGACTTGGTCTAGGTTGGCAGTGATACTAAGCTG	177	46	TCCATTACAGCAAACACAAATTCCAGACTATGCTGAGCTTATTGTTAAGTTTCTTGATGCCTTGATTGACACGTACCTGCCTGGAATTGATGAAGAAACCAGTGAAGAATCCCTCCTGACTCCCACATCTCCTTACCCTCCTGCACTGCAGAGCCAGCTTAGTATCACTGCCAACCT
NF1	NF1_120	chr17	29687587	29687774	ACACTGACGACATGGTTCTACAAAGAAACCAGTGAAGAATCCCTCC	TACGGTAGCAGAGACTTGGTCTTGTTGGTGTCTTATATTGTTGCTCA	188	45	AAGAAACCAGTGAAGAATCCCTCCTGACTCCCACATCTCCTTACCCTCCTGCACTGCAGAGCCAGCTTAGTATCACTGCCAACCTTAACCTTTCTAATTCCATGACCTCACTTGCAACTTCCCAGCATTCCCCAGGTCAGTAAATGTGATCTTTATATGACTTTGAGCAACAATATAAGACACCAACA
NF1	NF1_121	chr17	29700970	29701168	ACACTGACGACATGGTTCTACAgCAATGAAATTCAGTCCTGGAAG	TACGGTAGCAGAGACTTGGTCTCGATCTTCTTAATGCTATTACGTTTGA	199	48	gCAATGAAATTCAGTCCTGGAAGGAAAAGAAGAAGTAACTGGCTGTTCTCTTTTTCTCCAGGAATCGACAAGGAGAACGTTGAACTCTCCCCTACCACTGGCCACTGTAACAGTGGACGAACTCGCCACGGATCCGCAAGCCAAGTGCAGAAGCAAAGAAGCGCTGGCAGTTTCAAACGTAATAGCATTAAGAAGATCG	One primer sits in the repeat region
NF1	NF1_122	chr17	29701025	29701222	ACACTGACGACATGGTTCTACACTCCAGGAATCGACAAGGAGAAC	TACGGTAGCAGAGACTTGGTCTAGTGAAGAGCCCATGTTAAGTTGAT	198	47	CTCCAGGAATCGACAAGGAGAACGTTGAACTCTCCCCTACCACTGGCCACTGTAACAGTGGACGAACTCGCCACGGATCCGCAAGCCAAGTGCAGAAGCAAAGAAGCGCTGGCAGTTTCAAACGTAATAGCATTAAGAAGATCGTGTGAAGCTTGCTTGCTTTCTTTTTTAAAATCAACTTAACATGGGCTCTTCACT
PALB2	PALB2_1	chr16	23614718	23614903	ACACTGACGACATGGTTCTACAACTCCAAAAAATACTAAGAGGCCCAA	TACGGTAGCAGAGACTTGGTCTGTGTACTGCCCTCCTCCCA	186	40	ACTCCAAAAAATACTAAGAGGCCCAATATATCCAGAAAATTGTGTTTTCACTTTACCCTAACTTATGAATAGTGGTATACAAATATATTTCCATCTTTTTGTCCAGCCAGCAAATGAGAGTCTGTACCCGACCATTTCACAAAAGACCAATGTTGGTCAGAGACAGGTGGGAGGAGGGCAGTACAC
PALB2	PALB2_2	chr16	23614813	23614984	ACACTGACGACATGGTTCTACATTTTTGTCCAGCCAGCAAATGAG	TACGGTAGCAGAGACTTGGTCTGGAAGGTGACGTGAAAGATCACT	172	48	TTTTTGTCCAGCCAGCAAATGAGAGTCTGTACCCGACCATTTCACAAAAGACCAATGTTGGTCAGAGACAGGTGGGAGGAGGGCAGTACACTGACCGAGAAGTAAGTCCCAAATGGCAATTGTTCCAGAAGTCAAGATTGCTGCTGCACAGTGATCTTTCACGTCACCTTCC
PALB2	PALB2_3	chr16	23614918	23615095	ACACTGACGACATGGTTCTACAGTCCCAAATGGCAATTGTTCCAG	TACGGTAGCAGAGACTTGGTCTTTTGTTCCTGTTGCTGGTTTTGG	178	37	GTCCCAAATGGCAATTGTTCCAGAAGTCAAGATTGCTGCTGCACAGTGATCTTTCACGTCACCTTCCAGGAACCTGATAGCATACAAAGAAGATATAATTCAGATTACATATCCAAAAAACAATTAAAAAAAAAAAAAAGGTCAAAACCATGTTCCCAAAACCAGCAACAGGAACAAA
PALB2	PALB2_4	chr16	23619121	23619297	ACACTGACGACATGGTTCTACATTTTGTGTTTGCACAGTGCCTTT	TACGGTAGCAGAGACTTGGTCTAAAGAGAGTGAGTCGTTGCGAAG	177	50	TTTTGTGTTTGCACAGTGCCTTTCAGAATGTCCCACCCATAGAGTAGCAGTTATGCACACTTGCCTGCCAGCCTGCCCTGGAGGAAGACAGTACAGCATCACACCCACGCTGAGAGTCGTCTTAGGGTTAATCACAATGAGCTGAAACACAGGGCTTCGCAACGACTCACTCTCTTT
PALB2	PALB2_5	chr16	23619192	23619382	ACACTGACGACATGGTTCTACACCTGCCCTGGAGGAAGACA	TACGGTAGCAGAGACTTGGTCTACATACTCTTGACAGTCTATTTGGGA	191	47	CCTGCCCTGGAGGAAGACAGTACAGCATCACACCCACGCTGAGAGTCGTCTTAGGGTTAATCACAATGAGCTGAAACACAGGGCTTCGCAACGACTCACTCTCTTTGGCACAGGGATGACTCAGGACAATAAAGAGAAGCCCCTAATTTCGGAGAAAAATAAATATCCCAAATAGACTGTCAAGAGTATGT
PALB2	PALB2_6	chr16	23625270	23625462	ACACTGACGACATGGTTCTACACACTTAATGAGACCAACAGTAACAC	TACGGTAGCAGAGACTTGGTCTACTGGTTTGTTGGAAGAATGTGA	193	37	CACTTAATGAGACCAACAGTAACACACAAAGTGGTCCCAGCCAGTCATTACTTACCATTTCAGAATAGGCTTTGTGACAGACTGAAGCTTGGTAAGAATCATCAATGTGCATCTTTTTCAGGAGTTGACCAGTTTTTAAATTCCTTAGATAACAAAAATAAATAAGCTGATCACATTCTTCCAACAAACCAGT
PALB2	PALB2_7	chr16	23632656	23632854	ACACTGACGACATGGTTCTACAAACTGAGGACCTAGAGGGAAAGC	TACGGTAGCAGAGACTTGGTCTACCTAGAGACTGCTTTAGTGCAA	199	40	aactgaggacctagagggaaagcttaccaaaTAACAATGTTGTTCATAATAGTAGTACCAAGCAGAGCTTCTTGCATCCCTTGGACCTCAGCAAAAGTTAGTATAGTCTCCTCAGGGGGCATCAAAAATTGGTTTTCTTTGCCTCTGTAATTAAAACAGTATGAAAAGTCAGTACTTTGCACTAAAGCAGTCTCTAGGT	One primer sits in the repeat region
PALB2	PALB2_8	chr16	23634201	23634397	ACACTGACGACATGGTTCTACAACGAGATCCTAGTTACCCAACTTT	TACGGTAGCAGAGACTTGGTCTTGGAAATATAAAAGCTGTGCTTGGC	197	39	ACGAGATCCTAGTTACCCAACTTTCTCTGAAACCTGTGATAAAATCATTCTTCATCTAATAGTTAAAAATCAATCAATGCTTTTCTTACCCTCCATCTTCTGCAAACGTCATGACTTCTACTTGTTGATCAGAAAGGGTCCCACTGCTACTAACTAGCCTCCTCTTTGTCAGGCCAAGCACAGCTTTTATATTTCCA
PALB2	PALB2_9	chr16	23634333	23634503	ACACTGACGACATGGTTCTACAAAAGGGTCCCACTGCTACTAACT	TACGGTAGCAGAGACTTGGTCTTATTAAAAGGTTACTCCTCACATCACCC	171	40	AAAGGGTCCCACTGCTACTAACTAGCCTCCTCTTTGTCAGGCCAAGCACAGCTTTTATATTTCCAGACTTCAGTAGTACTTGCTTTTCACTTTCATCATCAGAGGAACAAAACAATGCCCTAAGCCAAATATAAGGAAAAATGGGGTGATGTGAGGAGTAACCTTTTAATA
PALB2	PALB2_10	chr16	23635275	23635447	ACACTGACGACATGGTTCTACAAGCTGACAGAGACAAAGATGAAGG	TACGGTAGCAGAGACTTGGTCTAGCATAATTTTTGGCTGCTTTGTTT	173	38	AGCTGACAGAGACAAAGATGAAGGAAAAACAAATCACTCCTTGGGAATTACATACCTGATCTCTCTGATTTCCAAATTTCCCAAAGCTACACACACGAGATTATACACATCAGGCACTGGAACTATCTGTAATACTGGAACCTAAATAAAACAAAGCAGCCAAAAATTATGCT
PALB2	PALB2_11	chr16	23637478	23637667	ACACTGACGACATGGTTCTACACCAATTTTGGTAAGCTGCCCATC	TACGGTAGCAGAGACTTGGTCTGCCGGTTGTAAAGAGCCATGTAT	190	45	CCAATTTTGGTAAGCTGCCCATCTACATTATCAGGCAAATGGCTGCAAAGATCTCTTTCAGCTCGAGATTCCCACTTACCTCTGCGAAGTGCCAGGTATAAAGTTTTTCCCACTGCCAAGCATCCAGAGCTTTCCAAAGAGAAACTACATCTTCGCAAGCAGTTATGATACATGGCTCTTTACAACCGGC
PALB2	PALB2_12	chr16	23637543	23637741	ACACTGACGACATGGTTCTACAAGATTCCCACTTACCTCTGCGAA	TACGGTAGCAGAGACTTGGTCTCAGAACTGTTGCCATTGTGTCAG	199	46	AGATTCCCACTTACCTCTGCGAAGTGCCAGGTATAAAGTTTTTCCCACTGCCAAGCATCCAGAGCTTTCCAAAGAGAAACTACATCTTCGCAAGCAGTTATGATACATGGCTCTTTACAACCGGCTCTTTCCCAAAACATGGCACTCACATCTACGGAACAGGAACCTGAAGGATTCTGACACAATGGCAACAGTTCTG
PALB2	PALB2_13	chr16	23640434	23640632	ACACTGACGACATGGTTCTACAAGAACAAGAAGCTATATGACTGAATTCTT	TACGGTAGCAGAGACTTGGTCTAAGTGTAGACTAATGATGTGACTTTTG	199	37	AGAACAAGAAGCTATATGACTGAATTCTTTTCAGTTCATTAAAGTTTTCATATGTAAGACACGAGACACTGGAAGAGAATATTCTTCTGACCTTTAACTCTGAAACCAATTGTAGGTTGCCTGGGTTTATGCTATCAGAAGCAGGAAGCTCTGCTGTTTCAGTCTGTGAAAACAAAAGTCACATCATTAGTCTACACTT
PALB2	PALB2_14	chr16	23640891	23641085	ACACTGACGACATGGTTCTACATCATGCTGTTTACATTCACTAAGGC	TACGGTAGCAGAGACTTGGTCTAACCTACCTGTGACTGTGACTCT	195	43	TCATGCTGTTTACATTCACTAAGGCATTTCATTCCTTCAGAGAAAATTTCACAGAGGAAATGGATTGTACCTGTTCGACGGAATGTTTATGCAGCTCCTGGCATGTGTTTCTACAGAGCTGATTTTCTTTAAAAGTGAATGACTCAATGGGTGGAGGTGTTCCTGGCGGGACAGAGTCACAGTCACAGGTAGGTT
PALB2	PALB2_15	chr16	23640986	23641180	ACACTGACGACATGGTTCTACATCCTGGCATGTGTTTCTACAGAG	TACGGTAGCAGAGACTTGGTCTCTCAGTCTGTCTTGCCAGTGATA	195	49	TCCTGGCATGTGTTTCTACAGAGCTGATTTTCTTTAAAAGTGAATGACTCAATGGGTGGAGGTGTTCCTGGCGGGACAGAGTCACAGTCACAGGTAGGTTGTCCTTGCCTGCCTGACACTTGCAGGGTGGTATGTGGTTTTGCTGGGCTGCCTGAACTGTCGAATTGTTTAGTATCACTGGCAAGACAGACTGAG
PALB2	PALB2_16	chr16	23641064	23641260	ACACTGACGACATGGTTCTACAGAGTCACAGTCACAGGTAGGTTG	TACGGTAGCAGAGACTTGGTCTCCTCAAGGCTCCTATGAAAAAGC	197	49	GAGTCACAGTCACAGGTAGGTTGTCCTTGCCTGCCTGACACTTGCAGGGTGGTATGTGGTTTTGCTGGGCTGCCTGAACTGTCGAATTGTTTAGTATCACTGGCAAGACAGACTGAGTCTTTCAAATGAGCAAGTTGGGGTGTGCAGCAAGTTCGTCCAGCAACTTCTGTAGATGCTTTTTCATAGGAGCCTTGAGG
PALB2	PALB2_17	chr16	23641190	23641388	ACACTGACGACATGGTTCTACATGAGCAAGTTGGGGTGTGC	TACGGTAGCAGAGACTTGGTCTCGGGCCTTTCTTCATCCATATTACT	199	47	TGAGCAAGTTGGGGTGTGCAGCAAGTTCGTCCAGCAACTTCTGTAGATGCTTTTTCATAGGAGCCTTGAGGGCCAAAGGCTGGAGTAGTACCTAAGATGGGGAAAGCAGGTGAACACATGTCTGTGGTAGGCCTGTCATTATCATCAGGCGCAACCGTATTTAAAGGAGTATAAAGTAATATGGATGAAGAAAGGCCCG
PALB2	PALB2_18	chr16	23641297	23641488	ACACTGACGACATGGTTCTACAAGGTGAACACATGTCTGTGGTAG	TACGGTAGCAGAGACTTGGTCTCGCATGGATACAGAAATGGAGGA	192	44	AGGTGAACACATGTCTGTGGTAGGCCTGTCATTATCATCAGGCGCAACCGTATTTAAAGGAGTATAAAGTAATATGGATGAAGAAAGGCCCGTCTTTGTATGCTGGCTTTGCGAGTTTGGCCTTTTGGGATGTGATTTTCCTGGTAGAACAATAAGGTCCTCTTCTAAGTCCTCCATTTCTGTATCCATGCG
PALB2	PALB2_19	chr16	23641355	23641541	ACACTGACGACATGGTTCTACAGGAGTATAAAGTAATATGGATGAAGAAAGGC	TACGGTAGCAGAGACTTGGTCTAGAGACATCTTAAAGAGGGAAGCTG	187	42	GGAGTATAAAGTAATATGGATGAAGAAAGGCCCGTCTTTGTATGCTGGCTTTGCGAGTTTGGCCTTTTGGGATGTGATTTTCCTGGTAGAACAATAAGGTCCTCTTCTAAGTCCTCCATTTCTGTATCCATGCGTTTAGGACTCAGTTCCTCTGGAAAAATACAGCTTCCCTCTTTAAGATGTCTCT
PALB2	PALB2_20	chr16	23641463	23641633	ACACTGACGACATGGTTCTACAAAGTCCTCCATTTCTGTATCCATGC	TACGGTAGCAGAGACTTGGTCTACCTGATGAAGACTTTGGACCTC	171	42	AAGTCCTCCATTTCTGTATCCATGCGTTTAGGACTCAGTTCCTCTGGAAAAATACAGCTTCCCTCTTTAAGATGTCTCTCTCCAAACATTTTTGACTCAAAGGGCTCCACTGGTTTTTCTGAGCAGGACTTCACTTTTTCAAGCTTAAGAGGTCCAAAGTCTTCATCAGGT
PALB2	PALB2_21	chr16	23641559	23641731	ACACTGACGACATGGTTCTACATCAAAGGGCTCCACTGGTTTTTC	TACGGTAGCAGAGACTTGGTCTTCCTTGGATGATGATGCTTTCAC	173	42	TCAAAGGGCTCCACTGGTTTTTCTGAGCAGGACTTCACTTTTTCAAGCTTAAGAGGTCCAAAGTCTTCATCAGGTAACTGAAAGTCTGTGATACTGAGAAAAGACAGTAGTTGCTTTAAACTCAGCATTCCATCCCTATGAAATGGAGCCGTGAAAGCATCATCATCCAAGGA
PALB2	PALB2_22	chr16	23641645	23641843	ACACTGACGACATGGTTCTACATGTGATACTGAGAAAAGACAGTAGTTG	TACGGTAGCAGAGACTTGGTCTTGTCTGTTTTGTTGGGTTTTGTT	199	36	TGTGATACTGAGAAAAGACAGTAGTTGCTTTAAACTCAGCATTCCATCCCTATGAAATGGAGCCGTGAAAGCATCATCATCCAAGGATAAATAAGCACTATTACTCCAAGAAAGGGAATCCTCTTTTTGATGACGACTTTTCTTCCCTAAAGAAGAAAAATAAGTCACAAAATAGTAACAAAACCCAACAAAACAGACA
PALB2	PALB2_23	chr16	23646074	23646272	ACACTGACGACATGGTTCTACAcacttggccCTGTCACTTTTTAG	TACGGTAGCAGAGACTTGGTCTCAACTTCTAGCCTGTCGATTGTT	199	36	cacttggccCTGTCACTTTTTAGAAAAGAAAGAAAAGGAAGTGCCAGGCAAATAGTAATTGTTAACTTtcatcatcatcatcatcatcatcaAACACATCTTGATTTACCTTTCACTTGAATAAATAATTTTTCGTGCTGATATTTGTGTGAGGTGACTTCTTCCTTGGACCTGTTAACAATCGACAGGCTAGAAGTTG	One primer sits in the repeat region
PALB2	PALB2_24	chr16	23646206	23646376	ACACTGACGACATGGTTCTACATCGTGCTGATATTTGTGTGAGGT	TACGGTAGCAGAGACTTGGTCTTGACTTGTCTAGGAAGGCAGTTG	171	46	TCGTGCTGATATTTGTGTGAGGTGACTTCTTCCTTGGACCTGTTAACAATCGACAGGCTAGAAGTTGGCAAAAGTGGTTCACAATGATCTGATGCTGGGGTGCAGGCTGATTTTCTTTTTCCTGTGTATCTTCTACCAGGTGCTTGGGCAACTGCCTTCCTAGACAAGTCA	Assays designed by relax mode and have no off-target hits
PALB2	PALB2_25	chr16	23646305	23646480	ACACTGACGACATGGTTCTACAGTGCAGGCTGATTTTCTTTTTCC	TACGGTAGCAGAGACTTGGTCTATTAGGATGTCTGGCACATGCAC	176	47	GTGCAGGCTGATTTTCTTTTTCCTGTGTATCTTCTACCAGGTGCTTGGGCAACTGCCTTCCTAGACAAGTCATTATCTTCAGTGGGCCCAGCGGGAGAGCTGACTTTAGTTAATGAGAGAAGTTTCTGAGAGGTTCTTGAACTTGGTTGTCCTGTGCATGTGCCAGACATCCTAAT
PALB2	PALB2_26	chr16	23646412	23646592	ACACTGACGACATGGTTCTACAAGTTAATGAGAGAAGTTTCTGAGAGGT	TACGGTAGCAGAGACTTGGTCTGGAGGCTGTCATTCAGAGTCATT	181	36	AGTTAATGAGAGAAGTTTCTGAGAGGTTCTTGAACTTGGTTGTCCTGTGCATGTGCCAGACATCCTAATTTCACTTTGGTCAGTTTCCTCATTGGAAAGGTTTAAATTTTTACTTGCATCCTTATTTTTATTTTTAAACCCTTTTTTCTTGACATCCAAATGACTCTGAATGACAGCCTCC
PALB2	PALB2_27	chr16	23646523	23646718	ACACTGACGACATGGTTCTACAACTTGCATCCTTATTTTTATTTTTAAACCC	TACGGTAGCAGAGACTTGGTCTGGAAGCAACCTCTCCTCTTTCTG	196	41	ACTTGCATCCTTATTTTTATTTTTAAACCCTTTTTTCTTGACATCCAAATGACTCTGAATGACAGCCTCCACGGCTACTTTCCTCTGGCAATTGGACATGCTTCGTGTTGTTCTAACATAATATTCTGCAGGAAACAGAAGGCCTTCAGGCACTGTGCAAGAATGTTTTTCTGCAGAAAGAGGAGAGGTTGCTTCC
PALB2	PALB2_28	chr16	23646672	23646856	ACACTGACGACATGGTTCTACAGCACTGTGCAAGAATGTTTTTCTG	TACGGTAGCAGAGACTTGGTCTACCAGCAAATGAAAACCAAAACT	185	38	GCACTGTGCAAGAATGTTTTTCTGCAGAAAGAGGAGAGGTTGCTTCCAGGCTAAGACTCTTAGGTTGACTTAGAATCTCACTTTCCTGAAGATTTTCATTCCTGCCATCAAGAGTGTCACTGGGAGATTTTAAAGATTTCTCTGTTTGATTTTGTTCTTTTAAGTTTTGGTTTTCATTTGCTGGT	Assays designed by relax mode and have no off-target hits
PALB2	PALB2_29	chr16	23646759	23646929	ACACTGACGACATGGTTCTACAGAAGATTTTCATTCCTGCCATCAAG	TACGGTAGCAGAGACTTGGTCTGCCAACTGCCCACAAGTTCTAAT	171	35	GAAGATTTTCATTCCTGCCATCAAGAGTGTCACTGGGAGATTTTAAAGATTTCTCTGTTTGATTTTGTTCTTTTAAGTTTTGGTTTTCATTTGCTGGTAAGTTATTGTAGGTGAGTTCATTTAGAGAACATGAAATATTTGCCTCTAAATTAGAACTTGTGGGCAGTTGGC
PALB2	PALB2_30	chr16	23646834	23647028	ACACTGACGACATGGTTCTACAAGTTTTGGTTTTCATTTGCTGGT	TACGGTAGCAGAGACTTGGTCTACATTAGATTTACTTCACCTGTAAGTTTG	195	35	AGTTTTGGTTTTCATTTGCTGGTAAGTTATTGTAGGTGAGTTCATTTAGAGAACATGAAATATTTGCCTCTAAATTAGAACTTGTGGGCAGTTGGCCACTTTTACTTATAGCTTTATTTACAAGGAGGTTATCTGTAGAGACAGTCATTTTTTTGCCTTGTGCCTCCAAACTTACAGGTGAAGTAAATCTAATGT	Assays designed by relax mode and have no off-target hits
PALB2	PALB2_31	chr16	23646919	23647101	ACACTGACGACATGGTTCTACAGGGCAGTTGGCCACTTTTACTTA	TACGGTAGCAGAGACTTGGTCTAGCGGTAGTAGTCAGCACCTT	183	40	GGGCAGTTGGCCACTTTTACTTATAGCTTTATTTACAAGGAGGTTATCTGTAGAGACAGTCATTTTTTTGCCTTGTGCCTCCAAACTTACAGGTGAAGTAAATCTAATGTTTTTTAGGTCGTGAGTAGTAAGTTCACTGCTACCTTTAGGAGGAATGTGTTCAAGGTGCTGACTACTACCGCT
PALB2	PALB2_32	chr16	23646992	23647190	ACACTGACGACATGGTTCTACATGTGCCTCCAAACTTACAGGT	TACGGTAGCAGAGACTTGGTCTCTGCCCAACCAGAAAAAGGT	199	42	TGTGCCTCCAAACTTACAGGTGAAGTAAATCTAATGTTTTTTAGGTCGTGAGTAGTAAGTTCACTGCTACCTTTAGGAGGAATGTGTTCAAGGTGCTGACTACTACCGCTATCTGATAGAGTCTGTAAAGGAACTGTAGTCGCCCTGGTGAAATTAGGTCTTCTTAGGAATGTATCAACACCTTTTTCTGGTTGGGCAG
PALB2	PALB2_33	chr16	23647119	23647307	ACACTGACGACATGGTTCTACAAAGGAACTGTAGTCGCCCTG	TACGGTAGCAGAGACTTGGTCTCTGCTAGATCACCAGTAACTGAAA	189	39	AAGGAACTGTAGTCGCCCTGGTGAAATTAGGTCTTCTTAGGAATGTATCAACACCTTTTTCTGGTTGGGCAGTTGGTGGAATTAATACACTGTCTTCATTAATTTCTGTAACTGGTTCTGGAGAATCTGGAAGTTCAGATTTAAGACTTAAAAGGTGAGTTCTTATTTCAGTTACTGGTGATCTAGCAG
PALB2	PALB2_34	chr16	23647173	23647351	ACACTGACGACATGGTTCTACACTTTTTCTGGTTGGGCAGTTGG	TACGGTAGCAGAGACTTGGTCTTGGGAAAAGACTAAAGGAACAGGA	179	37	CTTTTTCTGGTTGGGCAGTTGGTGGAATTAATACACTGTCTTCATTAATTTCTGTAACTGGTTCTGGAGAATCTGGAAGTTCAGATTTAAGACTTAAAAGGTGAGTTCTTATTTCAGTTACTGGTGATCTAGCAGGATTTTTGCTACTGATTTCTTCCTGTTCCTTTAGTCTTTTCCCA
PALB2	PALB2_35	chr16	23647287	23647464	ACACTGACGACATGGTTCTACACAGTTACTGGTGATCTAGCAGGATT	TACGGTAGCAGAGACTTGGTCTCCTAGTGGTGAGCAAAAGCAGAA	178	44	CAGTTACTGGTGATCTAGCAGGATTTTTGCTACTGATTTCTTCCTGTTCCTTTAGTCTTTTCCCAGACAATCTGAGTGAATCAGTGCCAAAGACACAGTCTCTCTCCTGTGAAATAAATGTCCTCTTCTGCTGCTTCTTTCTTCTGCTTGGCAGCTTCTGCTTTTGCTCACCACTAGG
PALB2	PALB2_36	chr16	23647378	23647567	ACACTGACGACATGGTTCTACAGACACAGTCTCTCTCCTGTGAAA	TACGGTAGCAGAGACTTGGTCTTGATGTTGGGCCTGAGTCCTTTA	190	48	GACACAGTCTCTCTCCTGTGAAATAAATGTCCTCTTCTGCTGCTTCTTTCTTCTGCTTGGCAGCTTCTGCTTTTGCTCACCACTAGGGTCACTGACCCTGTGGGGAAAATGTTCTTGGGTGTCATCTGTTCTTTGTATAGGTAATCCTCCTGGGCCATCTCCAGGGTTAAAGGACTCAGGCCCAACATCA
PALB2	PALB2_42	chr16	23647518	23647668	ACACTGACGACATGGTTCTACAGTAATCCTCCTGGGCCATCT	TACGGTAGCAGAGACTTGGTCTTTTTCCTCCTCAGAACCTAAAAA	151	40	GTAATCCTCCTGGGCCATCTCCAGGGTTAAAGGACTCAGGCCCAACATCAAGTGTGATAGATGTCTTTTCTCCAGTTTCTTCATCAAGATGGGTTTTGATGTGTAACTTGTCATAAACACATATTTTATTTTTAGGTTCTGAGGAGGAAAA
PALB2	PALB2_43	chr16	23647604	23647786	ACACTGACGACATGGTTCTACAAGATGGGTTTTGATGTGTAACTTGT	TACGGTAGCAGAGACTTGGTCTTGAATGAAATGTCACTGATTCTTTCTTAAAT	183	21	AGATGGGTTTTGATGTGTAACTTGTCATAAACACATATTTTATTTTTAGGTTCTGAGGAGGaaaaaaatgtatataacttatatttttcttataaaataaaacaaaaaataCTCATTTTTAACCTATTATATATAAATACTACTAAACATTTATTTAAGAAAGAATCAGTGACATTTCATTCA
PALB2	PALB2_39	chr16	23649110	23649300	ACACTGACGACATGGTTCTACAAGCCAAAATATACCTGGGAAATGA	TACGGTAGCAGAGACTTGGTCTTTCTGGGGCTGTTTTTGTCTCC	191	40	AGCCAAAATATACCTGGGAAATGAATAATAAAGCAGGCATAAGTGAATGGTCTAGATTTACCTGAGTGTTTTAGCTGCGGTGAGAGATCCTGCTGAGACAAACAATCTTGTTCTTCTACTGTTTTCTTAATAGAATGCTTAATCTTTTCAGCTCTTTGGGCACGCTAGAGGAGACAAAAACAGCCCCAGAA
PALB2	PALB2_40	chr16	23649324	23649504	ACACTGACGACATGGTTCTACAAGAGTCAAGAACTGTTTTTAAATTGTTTG	TACGGTAGCAGAGACTTGGTCTCTCTGACTCCACCTTTCCACTTG	181	38	AGAGTCAAGAACTGTTTTTAAATTGTTTGTACTATAACACCTTAATTTGAGAATACGATTCACTTACCTGAAGGCGGGCTAGTGTCTTGCTGTATTCCCTTTTCAAGAATGCTAATTTCTCCTTTAACTGGAAGAAGAAAAACACCAACAATACTGGGCAAGTGGAAAGGTGGAGTCAGAG
PALB2	PALB2_41	chr16	23652326	23652511	ACACTGACGACATGGTTCTACAAGATGATACTGCTGCCCTCG	TACGGTAGCAGAGACTTGGTCTGACGGCTGCTCTTTTCGTTCTG	186	63	AGATGATACTGCTGCCCTCGGACTGCCGAGGACACAAAGCCAGGCCTAAAACCCTGGGAAAGCGGGGTCAGAGTCCTGCGTCCGCCCTTCCCGCACCCCCGGCACCTTTTCCTTCTCCTCACAGCTGAGGGGCTTCCCGGGAGGCTCGTCCATCGGGCAGGCGACAGAACGAAAAGAGCAGCCGTC
PIK3CA	PIK3CA_1	chr3	178916540	178916730	ACACTGACGACATGGTTCTACATTCTGCTTTGGGACAACCATACA	TACGGTAGCAGAGACTTGGTCTCTCACGGAGGCATTCTAAAGTCA	191	41	TTCTGCTTTGGGACAACCATACATCTAATTCCTTAAAGTAGTTTTATATGTAAAACTTGCAAAGAATCAGAACAATGCCTCCACGACCATCATCAGGTGAACTGTGGGGCATCCACTTGATGCCCCCAAGAATCCTAGTAGAATGTTTACTACCAAATGGAATGATAGTGACTTTAGAATGCCTCCGTGAG
PIK3CA	PIK3CA_2	chr3	178916626	178916807	ACACTGACGACATGGTTCTACACCATCATCAGGTGAACTGTGGG	TACGGTAGCAGAGACTTGGTCTTCATCTTGAAGAAGTTGATGGAGGG	182	41	CCATCATCAGGTGAACTGTGGGGCATCCACTTGATGCCCCCAAGAATCCTAGTAGAATGTTTACTACCAAATGGAATGATAGTGACTTTAGAATGCCTCCGTGAGGCTACATTAATAACCATAAAGCATGAACTATTTAAAGAAGCAAGAAAATACCCCCTCCATCAACTTCTTCAAGATGA
PIK3CA	PIK3CA_3	chr3	178916707	178916902	ACACTGACGACATGGTTCTACAGTGACTTTAGAATGCCTCCGTGA	TACGGTAGCAGAGACTTGGTCTGTTGAAAAAGCCGAAGGTCACAA	196	37	GTGACTTTAGAATGCCTCCGTGAGGCTACATTAATAACCATAAAGCATGAACTATTTAAAGAAGCAAGAAAATACCCCCTCCATCAACTTCTTCAAGATGAATCTTCTTACATTTTCGTAAGTGTTACTCAAGAAGCAGAAAGGGAAGAATTTTTTGATGAAACAAGACGACTTTGTGACCTTCGGCTTTTTCAAC
PIK3CA	PIK3CA_4	chr3	178916834	178917032	ACACTGACGACATGGTTCTACACTCAAGAAGCAGAAAGGGAAGAA	TACGGTAGCAGAGACTTGGTCTTTTTAGAAAGGGACAACAGTTAAGC	199	35	CTCAAGAAGCAGAAAGGGAAGAATTTTTTGATGAAACAAGACGACTTTGTGACCTTCGGCTTTTTCAACCCTTTTTAAAAGTAATTGAACCAGTAGGCAACCGTGAAGAAAAGATCCTCAATCGAGAAATTGGTATGATACAATATCCTATTCTAAAATGCAAATAACCATAAAGCTTAACTGTTGTCCCTTTCTAAAA
PIK3CA	PIK3CA_5	chr3	178917390	178917579	ACACTGACGACATGGTTCTACAAATCTACAGAGTTCCCTGTTTGC	TACGGTAGCAGAGACTTGGTCTCCACAGCTTCTTTACAAACGTTCA	190	34	AATCTACAGAGTTCCCTGTTTGCAAAAAAAACATGTTCATGCTGTGTATGTAATAGAATGTTATATTCTTTATGTAATTTTATTAAAGGTTTTGCTATCGGCATGCCAGTGTGTGAATTTGATATGGTTAAAGATCCAGAAGTACAGGACTTCCGAAGAAATATTCTGAACGTTTGTAAAGAAGCTGTGG
PIK3CA	PIK3CA_6	chr3	178917490	178917665	ACACTGACGACATGGTTCTACAGCATGCCAGTGTGTGAATTTGAT	TACGGTAGCAGAGACTTGGTCTGTGCTTTGGCAATTCTGGTGAAG	176	40	GCATGCCAGTGTGTGAATTTGATATGGTTAAAGATCCAGAAGTACAGGACTTCCGAAGAAATATTCTGAACGTTTGTAAAGAAGCTGTGGATCTTAGGGACCTCAATTCACCTCATAGTAGAGCAATGTATGTCTATCCTCCAAATGTAGAATCTTCACCAGAATTGCCAAAGCAC
PIK3CA	PIK3CA_7	chr3	178917580	178917750	ACACTGACGACATGGTTCTACAATCTTAGGGACCTCAATTCACCTCAT	TACGGTAGCAGAGACTTGGTCTatataGACACAGGTAGAAGACTGCACTA	171	33	ATCTTAGGGACCTCAATTCACCTCATAGTAGAGCAATGTATGTCTATCCTCCAAATGTAGAATCTTCACCAGAATTGCCAAAGCACATATATAATAAATTAGATAAAGGTAAGAAAATGACTAATCTACTCTAATCATTACTATAGTGCAGTCTTCTACCTGTGTCtatat	One primer sits in the repeat region
PIK3CA	PIK3CA_8	chr3	178919021	178919186	ACACTGACGACATGGTTCTACATCTCCCTTGAAAAATGAAAGAGAGATG	TACGGTAGCAGAGACTTGGTCTGCTTCAGCAATTACTTGTTCTGGT	166	37	TCTCCCTTGAAAAATGAAAGAGAGATGGTGATTGCATCTAATGTTTTCCTGTTATAGGGCAAATAATAGTGGTGATCTGGGTAATAGTTTCTCCAAATAATGACAAGCAGAAGTATACTCTGAAAATCAACCATGACTGTGTACCAGAACAAGTAATTGCTGAAGC
PIK3CA	PIK3CA_9	chr3	178919110	178919300	ACACTGACGACATGGTTCTACATCTCCAAATAATGACAAGCAGAAGT	TACGGTAGCAGAGACTTGGTCTAGGAAGTATTCATCACATCCACACA	191	35	TCTCCAAATAATGACAAGCAGAAGTATACTCTGAAAATCAACCATGACTGTGTACCAGAACAAGTAATTGCTGAAGCAATCAGGAAAAAAACTCGAAGTATGTTGCTATCCTCTGAACAACTAAAACTCTGTGTTTTAGAATATCAGGGCAAGTATATTTTAAAAGTGTGTGGATGTGATGAATACTTCCT
PIK3CA	PIK3CA_10	chr3	178919198	178919393	ACACTGACGACATGGTTCTACAAAACTCGAAGTATGTTGCTATCCT	TACGGTAGCAGAGACTTGGTCTGATACTCATCCTCAATGTGATTACTTTTT	196	30	AAACTCGAAGTATGTTGCTATCCTCTGAACAACTAAAACTCTGTGTTTTAGAATATCAGGGCAAGTATATTTTAAAAGTGTGTGGATGTGATGAATACTTCCTAGAAAAATATCCTCTGAGTCAGTATAAGGTGAGTAACAAGTTTCaaaatattaatttttaatttaaaaaGTAATCACATTGAGGATGAGTATC	One primer sits in the repeat region
PIK3CA	PIK3CA_11	chr3	178921287	178921459	ACACTGACGACATGGTTCTACATGAAAAACCTTACAGGAAATGGCTC	TACGGTAGCAGAGACTTGGTCTGCTGTGGAAATGCGTCTGGAATA	173	41	TGAAAAACCTTACAGGAAATGGCTCGCCCCCTTAATCTCTTACAGTATATAAGAAGCTGTATAATGCTTGGGAGGATGCCCAATTTGATGTTGATGGCTAAAGAAAGCCTTTATTCTCAACTGCCAATGGACTGTTTTACAATGCCATCTTATTCCAGACGCATTTCCACAGC
PIK3CA	PIK3CA_12	chr3	178921364	178921552	ACACTGACGACATGGTTCTACAGCCCAATTTGATGTTGATGGCTA	TACGGTAGCAGAGACTTGGTCTTTCACGTAGGTTGCACAAAGAAT	189	38	GCCCAATTTGATGTTGATGGCTAAAGAAAGCCTTTATTCTCAACTGCCAATGGACTGTTTTACAATGCCATCTTATTCCAGACGCATTTCCACAGCTACACCATATATGAATGGAGAAACATCTACAAAATCCCTTTGGGTTATAAATAGTGCACTCAGAATAAAAATTCTTTGTGCAACCTACGTGAA
PIK3CA	PIK3CA_13	chr3	178921429	178921612	ACACTGACGACATGGTTCTACATGCCATCTTATTCCAGACGCATT	TACGGTAGCAGAGACTTGGTCTTCTATAAAATAATAAGCATCAGCATTTGACT	184	34	TGCCATCTTATTCCAGACGCATTTCCACAGCTACACCATATATGAATGGAGAAACATCTACAAAATCCCTTTGGGTTATAAATAGTGCACTCAGAATAAAAATTCTTTGTGCAACCTACGTGAATGTAAATATTCGAGACATTGATAAGGTAAAGTCAAATGCTGATGCTTATTATTTTATAGA
PIK3CA	PIK3CA_14	chr3	178922190	178922381	ACACTGACGACATGGTTCTACATCTGAACAAAAATTCCGTGGTTT	TACGGTAGCAGAGACTTGGTCTCTTACCTGGGATTGGAACAAGGT	192	36	TCTGAACAAAAATTCCGTGGTTTTATATTTGAGTCTATCGAGTGTGTGCATATGTGTATGTTGAGTGTATACATTAGTATATACCTACTTTTTTCTTTTAGATCTATGTTCGAACAGGTATCTACCATGGAGGAGAACCCTTATGTGACAATGTGAACACTCAAAGAGTACCTTGTTCCAATCCCAGGTAAG
PIK3CA	PIK3CA_46	chr3	178922317	178922490	ACACTGACGACATGGTTCTACATGGAGGAGAACCCTTATGTGA	TACGGTAGCAGAGACTTGGTCTAATGGGGTCTTGCTTTGTTG	174	37	TGGAGGAGAACCCTTATGTGACAATGTGAACACTCAAAGAGTACCTTGTTCCAATCCCAGGTAAGGAAGTATATAGATTTATATTTCCAAAGGTTATATTAGTGTTTAGCAGTATGATCCATAAAAGTAGTATATTTTTTTAGACCAGCCTGGGCAACAAAGCAAGACCCCATT
PIK3CA	PIK3CA_16	chr3	178927282	178927474	ACACTGACGACATGGTTCTACATCGTTTGGTTGATCTTTGTCTTCG	TACGGTAGCAGAGACTTGGTCTTTCGGCCTTTAACAGAGCAAATG	193	35	tcgtttggttgatctttgtcttcgtgatttgtaggagtcatttatatactttgATGAAGACTTTTCTTGATGTATTATTTTTGCTTTAAAATTTTACATAGGTGGAATGAATGGCTGAATTATGATATATACATTCCTGATCTTCCTCGTGCTGCTCGACTTTGCCTTTCCATTTGCTCTGTTAAAGGCCGAA	One primer sits in the repeat region
PIK3CA	PIK3CA_17	chr3	178927377	178927549	ACACTGACGACATGGTTCTACAACATAGGTGGAATGAATGGCTGAA	TACGGTAGCAGAGACTTGGTCTTCAGCGGTATAATCAGGAGTTTTT	173	39	ACATAGGTGGAATGAATGGCTGAATTATGATATATACATTCCTGATCTTCCTCGTGCTGCTCGACTTTGCCTTTCCATTTGCTCTGTTAAAGGCCGAAAGGGTGCTAAAGAGGTAAAGTATTTCAGAAGGAACAATTATGTTTACCTTTAAAAACTCCTGATTATACCGCTGA
PIK3CA	PIK3CA_18	chr3	178927897	178928077	ACACTGACGACATGGTTCTACATTCCTTTTGGGGAAGAAAAGTGT	TACGGTAGCAGAGACTTGGTCTAATCCATGAGGTACTGGCCAAAG	181	33	TTCCTTTTGGGGAAGAAAAGTGTTTTGAAATGTGTTTTATAATTTAGACTAGTGAATATTTTTCTTTGTTTTTTAAGGAACACTGTCCATTGGCATGGGGAAATATAAACTTGTTTGATTACACAGACACTCTAGTATCTGGAAAAATGGCTTTGAATCTTTGGCCAGTACCTCATGGATT
PIK3CA	PIK3CA_19	chr3	178927987	178928184	ACACTGACGACATGGTTCTACATGGCATGGGGAAATATAAACTTGT	TACGGTAGCAGAGACTTGGTCTAAGAGAGAAGGTTTGACTGCCAT	198	34	TGGCATGGGGAAATATAAACTTGTTTGATTACACAGACACTCTAGTATCTGGAAAAATGGCTTTGAATCTTTGGCCAGTACCTCATGGATTAGAAGATTTGCTGAACCCTATTGGTGTTACTGGATCAAATCCAAATAAAGTAAGGTTTTTATTGTCATAAATTAGATATTTTTTATGGCAGTCAAACCTTCTCTCTT
PIK3CA	PIK3CA_20	chr3	178928162	178928345	ACACTGACGACATGGTTCTACAATGGCAGTCAAACCTTCTCTCTT	TACGGTAGCAGAGACTTGGTCTCGTGGGAATAGCTAAATCCTGCT	184	42	ATGGCAGTCAAACCTTCTCTCTTATGTATATATAATAGCTTTTCTTCCATCTCTTAGGAAACTCCATGCTTAGAGTTGGAGTTTGACTGGTTCAGCAGTGTGGTAAAGTTCCCAGATATGTCAGTGATTGAAGAGCATGCCAATTGGTCTGTATCCCGAGAAGCAGGATTTAGCTATTCCCACG
PIK3CA	PIK3CA_21	chr3	178928256	178928426	ACACTGACGACATGGTTCTACAGCAGTGTGGTAAAGTTCCCAGATA	TACGGTAGCAGAGACTTGGTCTTTCCATAGAGAAAGTATCTACCTAAATCCA	171	40	GCAGTGTGGTAAAGTTCCCAGATATGTCAGTGATTGAAGAGCATGCCAATTGGTCTGTATCCCGAGAAGCAGGATTTAGCTATTCCCACGCAGGACTGGTAAGGCAAATCACTGAGTTTATTAAGTATCAATTATAATCTGTGGATTTAGGTAGATACTTTCTCTATGGAA
PIK3CA	PIK3CA_22	chr3	178935933	178936130	ACACTGACGACATGGTTCTACATCTGTGAATCCAGAGGGGAAAAA	TACGGTAGCAGAGACTTGGTCTGCACTTACCTGTGACTCCATAGAA	198	36	TCTGTGAATCCAGAGGGGAAAAATATGACAAAGAAAGCTATATAAGATATTATTTTATTTTACAGAGTAACAGACTAGCTAGAGACAATGAATTAAGGGAAAATGACAAAGAACAGCTCAAAGCAATTTCTACACGAGATCCTCTCTCTGAAATCACTGAGCAGGAGAAAGATTTTCTATGGAGTCACAGGTAAGTGC	Assays designed by relax mode and have no off-target hits
PIK3CA	PIK3CA_23	chr3	178936035	178936196	ACACTGACGACATGGTTCTACAATGACAAAGAACAGCTCAAAGCA	TACGGTAGCAGAGACTTGGTCTTGAGATCAGCCAAATTCAGTTATTTTTT	162	36	ATGACAAAGAACAGCTCAAAGCAATTTCTACACGAGATCCTCTCTCTGAAATCACTGAGCAGGAGAAAGATTTTCTATGGAGTCACAGGTAAGTGCTAAAATGGAGATTCTCTGTTTCTTTTTCTTTATTACAGAAAAAATAACTGAATTTGGCTGATCTCA	Multiple hits
PIK3CA	PIK3CA_24	chr3	178936927	178937101	ACACTGACGACATGGTTCTACATCAACCTTTTGAACAGCATGCAA	TACGGTAGCAGAGACTTGGTCTACAACAGTTATCTAGTAATCTCAAACATACA	175	35	TCAACCTTTTGAACAGCATGCAAGAATGTTTATGTTTATTTTGTTTCTCCCACACAGACACTATTGTGTAACTATCCCCGAAATTCTACCCAAATTGCTTCTGTCTGTTAAATGGAATTCTAGAGATGAAGTAGCCCAGGTAAATGTATGTTTGAGATTACTAGATAACTGTTGT
PIK3CA	PIK3CA_25	chr3	178937283	178937477	ACACTGACGACATGGTTCTACAAAGGCAGTGTTTTAGATGGCTCA	TACGGTAGCAGAGACTTGGTCTTATTTTTCCAAGCACCGAACAGC	195	39	AAGGCAGTGTTTTAGATGGCTCATTCACAACTATCTTTCCCCTTTAAATATGATTTATTGTCTTTCTCATACACAGATGTATTGCTTGGTAAAAGATTGGCCTCCAATCAAACCTGAACAGGCTATGGAACTTCTGGACTGTAATTACCCAGATCCTATGGTTCGAGGTTTTGCTGTTCGGTGCTTGGAAAAATA
PIK3CA	PIK3CA_26	chr3	178937403	178937600	ACACTGACGACATGGTTCTACAGGCTATGGAACTTCTGGACTGTA	TACGGTAGCAGAGACTTGGTCTTTTAAAAGGAAGTTGTATGGATCTAGAATAAA	198	30	GGCTATGGAACTTCTGGACTGTAATTACCCAGATCCTATGGTTCGAGGTTTTGCTGTTCGGTGCTTGGAAAAATATTTAACAGATGACAAACTTTCTCAGTATTTAATTCAGCTAGTACAGGtaaaataatgtaaaatagtaaataatgtttaattacaataataatttattCTAGATCCATACAACTTCCTTTTAAA	One primer sits in the repeat region
PIK3CA	PIK3CA_27	chr3	178937696	178937876	ACACTGACGACATGGTTCTACATGCAGAAACTGACCCTGATTTGT	TACGGTAGCAGAGACTTGGTCTACCTTAAGAATTTAATGGGAAAATAATTAGACTT	181	31	TGCAGAAACTGACCCTGATTTGTTTTTTTGGAATCACCTAGGTCCTAAAATATGAACAATATTTGGATAACTTGCTTGTGAGATTTTTACTGAAGAAAGCATTGACTAATCAAAGGATTGGGCACTTTTTCTTTTGGCATTTAAAGTAAGTCTAATTATTTTCCCATTAAATTCTTAAGGT
PIK3CA	PIK3CA_28	chr3	178938685	178938856	ACACTGACGACATGGTTCTACAAATGAGTGTTTAAATTGTTTAGCAAAGATTA	TACGGTAGCAGAGACTTGGTCTTCAAATACATCCCACATGCACGA	172	31	AATGAGTGTTTAAATTGTTTAGCAAAGATTATTTGTATACTGATTTAAGACtatatatatatatttttaattttGCACGATTCTTTTAGATCTGAGATGCACAATAAAACAGTTAGCCAGAGGTTTGGCCTGCTTTTGGAGTCCTATTGTCGTGCATGTGGGATGTATTTGA	Multiple hits
PIK3CA	PIK3CA_29	chr3	178938770	178938966	ACACTGACGACATGGTTCTACATTAGATCTGAGATGCACAATAAAACAG	TACGGTAGCAGAGACTTGGTCTACACAAACTAGAGTCACACACCT	197	42	TTAGATCTGAGATGCACAATAAAACAGTTAGCCAGAGGTTTGGCCTGCTTTTGGAGTCCTATTGTCGTGCATGTGGGATGTATTTGAAGCACCTGAATAGGCAAGTCGAGGCAATGGAAAAGCTCATTAACTTAACTGACATTCTCAAACAGGAGAAGAAGGATGAAACACAAAAGGTGTGTGACTCTAGTTTGTGT
PIK3CA	PIK3CA_30	chr3	178938812	178939008	ACACTGACGACATGGTTCTACAGCCTGCTTTTGGAGTCCTATTGT	TACGGTAGCAGAGACTTGGTCTctTCTAAACAACTCTGCCCCACT	197	43	GCCTGCTTTTGGAGTCCTATTGTCGTGCATGTGGGATGTATTTGAAGCACCTGAATAGGCAAGTCGAGGCAATGGAAAAGCTCATTAACTTAACTGACATTCTCAAACAGGAGAAGAAGGATGAAACACAAAAGGTGTGTGACTCTAGTTTGTGTTTGAGACTCTTTTCACTGCAGTGGGGCAGAGTTGTTTAGAag	One primer sits in the repeat region
PIK3CA	PIK3CA_31	chr3	178941828	178941998	ACACTGACGACATGGTTCTACAAAGTCAGTTTCTTACTGTGACTATCC	TACGGTAGCAGAGACTTGGTCTCAATGAAACCCCCAAGAAAGTACC	171	41	AAGTCAGTTTCTTACTGTGACTATCCTTTTTTTTTAATCAGGTACAGATGAAGTTTTTAGTTGAGCAAATGAGGCGACCAGATTTCATGGATGCTCTACAGGGCTTTCTGTCTCCTCTAAACCCTGCTCATCAACTAGGAAACCTCAGGTACTTTCTTGGGGGTTTCATTG
PIK3CA	PIK3CA_32	chr3	178941913	178942103	ACACTGACGACATGGTTCTACACATGGATGCTCTACAGGGCTTT	TACGGTAGCAGAGACTTGGTCTAGGAGAATGAGAGAGAGAAGCAT	191	35	CATGGATGCTCTACAGGGCTTTCTGTCTCCTCTAAACCCTGCTCATCAACTAGGAAACCTCAGGTACTTTCTTGGGGGTTTCATTGATATATTTAAATAAATACCTTTTCTGGATAAAATCTTGAGAAAAGTAAAAATGTCTGTTATAATTAGAATGTTCAATAATTTATGCTTCTCTCTCTCATTCTCCT
PIK3CA	PIK3CA_33	chr3	178942343	178942541	ACACTGACGACATGGTTCTACAGGATTCCTAAATAAAAATTGAGGTGAAAGT	TACGGTAGCAGAGACTTGGTCTCAATTCAACCACAGTGGCCTTTT	199	28	GGATTCCTAAATAAAAATTGAGGTGAAAGTTGTAAATCTTTGTAACACTTCAAAAAGCTATATTGtatttatattttaaaataaatttCAGGGTAAAATAATAATAAAGCAAAGGTACCTAGTAAAGTTTTTAACTATTTTAAAGGCTTGAAGAGTGTCGAATTATGTCCTCTGCAAAAAGGCCACTGTGGTTGAATTG
PIK3CA	PIK3CA_34	chr3	178942482	178942652	ACACTGACGACATGGTTCTACATTAAAGGCTTGAAGAGTGTCGAA	TACGGTAGCAGAGACTTGGTCTAGCTAAATTCATGCATCATAAGCTC	171	39	TTAAAGGCTTGAAGAGTGTCGAATTATGTCCTCTGCAAAAAGGCCACTGTGGTTGAATTGGGAGAACCCAGACATCATGTCAGAGTTACTGTTTCAGAACAATGAGATCATCTTTAAAAATGGGGATGGTAAGGAAGAGTATTAATGAGCTTATGATGCATGAATTTAGCT
PIK3CA	PIK3CA_35	chr3	178943672	178943857	ACACTGACGACATGGTTCTACATTGAAAACCATGTGATGGCGTGA	TACGGTAGCAGAGACTTGGTCTACATACAGGTTGCCTTACTGGTT	186	36	TTGAAAACCATGTGATGGCGTGATCCCCAAATTTGCATCTGTGGCATTAAATGGTGATACATATTATTTGAATTTCAGATTTACGGCAAGATATGCTAACACTTCAAATTATTCGTATTATGGAAAATATCTGGCAAAATCAAGGTCTTGATCTTCGGTAGGTAACCAGTAAGGCAACCTGTATGT
PIK3CA	PIK3CA_36	chr3	178946970	178947167	ACACTGACGACATGGTTCTACAACTAATAAAATACTCATGTTTTAGCCTGTT	TACGGTAGCAGAGACTTGGTCTCCTTTCAAGCCGCCTTTGC	198	36	ACTAATAAAATACTCATGTTTTAGCCTGTTAAAACATTTGCTATTTTAAAATTCCATCATTTAATTGTAAACGTGTTACTCCTCTTTCAGAATGTTACCTTATGGTTGTCTGTCAATCGGTGACTGTGTGGGACTTATTGAGGTGGTGCGAAATTCTCACACTATTATGCAAATTCAGTGCAAAGGCGGCTTGAAAGG
PIK3CA	PIK3CA_37	chr3	178947092	178947275	ACACTGACGACATGGTTCTACAACTGTGTGGGACTTATTGAGGTG	TACGGTAGCAGAGACTTGGTCTACAAAAACTTAGATTAACATAGGAAGAAAGA	184	40	ACTGTGTGGGACTTATTGAGGTGGTGCGAAATTCTCACACTATTATGCAAATTCAGTGCAAAGGCGGCTTGAAAGGTGCACTGCAGTTCAACAGCCACACACTACATCAGTGGCTCAAAGACAAGAACAAAGGAGAAATGTGAGTTGTATTATTCTTTCTTCCTATGTTAATCTAAGTTTTTGT
PIK3CA	PIK3CA_38	chr3	178947707	178947877	ACACTGACGACATGGTTCTACAGGAAACTTGCACCCTGTTTTCTT	TACGGTAGCAGAGACTTGGTCTTGTGACGATCTCCAATTCCCAAA	171	40	GGAAACTTGCACCCTGTTTTCTTTTCTCAAGTTGGCCTGAATCACTATATTTCCATACTACTCATGAGGTGTTTATTCTTTGTAGATATGATGCAGCCATTGACCTGTTTACACGTTCATGTGCTGGATACTGTGTAGCTACCTTCATTTTGGGAATTGGAGATCGTCACA
PIK3CA	PIK3CA_39	chr3	178947782	178947952	ACACTGACGACATGGTTCTACATTCTTTGTAGATATGATGCAGCCATT	TACGGTAGCAGAGACTTGGTCTAAATTAAGAACACCAAAACATTTTAAACAGA	171	37	TTCTTTGTAGATATGATGCAGCCATTGACCTGTTTACACGTTCATGTGCTGGATACTGTGTAGCTACCTTCATTTTGGGAATTGGAGATCGTCACAATAGTAACATCATGGTGAAAGACGATGGACAAGTAATGGTTTTCTCTGTTTAAAATGTTTTGGTGTTCTTAATTT
PIK3CA	PIK3CA_40	chr3	178947897	178948091	ACACTGACGACATGGTTCTACAAGACGATGGACAAGTAATGGTTT	TACGGTAGCAGAGACTTGGTCTCAAATGGCACACGTTCTCGTTTA	195	29	AGACGATGGACAAGTAATGGTTTTCTCTGTTTAAAATGTTTTGGTGTTCTTAATTTATTCAAGACATTTTGTATCTGCATATATCAAACTATAACATAATTTCTTATTTTTGAAAGCTGTTTCATATAGATTTTGGACACTTTTTGGATCACAAGAAGAAAAAATTTGGTTATAAACGAGAACGTGTGCCATTTG
PIK3CA	PIK3CA_41	chr3	178948024	178948222	ACACTGACGACATGGTTCTACAAGATTTTGGACACTTTTTGGATCAC	TACGGTAGCAGAGACTTGGTCTTGTTTCTAATAGAGCAGCCAGAAC	199	35	AGATTTTGGACACTTTTTGGATCACAAGAAGAAAAAATTTGGTTATAAACGAGAACGTGTGCCATTTGTTTTGACACAGGATTTCTTAATAGTGATTAGTAAAGGAGCCCAAGAATGCACAAAGACAAGAGAATTTGAGAGGTGAGCTCGAGCAATTAAAAACACAAAATAAAGAGTTCTGGCTGCTCTATTAGAAACA
PIK3CA	PIK3CA_42	chr3	178951805	178951998	ACACTGACGACATGGTTCTACATGTGACATTTGAGCAAAGACCTG	TACGGTAGCAGAGACTTGGTCTTCATCAAAAGATTGTAGTTCTGGCAT	194	38	TGTGACATTTGAGCAAAGACCTGAAGGTATTAACATCATTTGCTCCAAACTGACCAAACTGTTCTTATTACTTATAGGTTTCAGGAGATGTGTTACAAGGCTTATCTAGCTATTCGACAGCATGCCAATCTCTTCATAAATCTTTTCTCAATGATGCTTGGCTCTGGAATGCCAGAACTACAATCTTTTGATGA
PIK3CA	PIK3CA_43	chr3	178951880	178952055	ACACTGACGACATGGTTCTACAAGGTTTCAGGAGATGTGTTACAAGG	TACGGTAGCAGAGACTTGGTCTTCCAAAGCCTCTTGCTCAGTTTT	176	40	AGGTTTCAGGAGATGTGTTACAAGGCTTATCTAGCTATTCGACAGCATGCCAATCTCTTCATAAATCTTTTCTCAATGATGCTTGGCTCTGGAATGCCAGAACTACAATCTTTTGATGACATTGCATACATTCGAAAGACCCTAGCCTTAGATAAAACTGAGCAAGAGGCTTTGGA
PIK3CA	PIK3CA_44	chr3	178951952	178952143	ACACTGACGACATGGTTCTACATCAATGATGCTTGGCTCTGGAAT	TACGGTAGCAGAGACTTGGTCTTGCATGCTGTTTAATTGTGTGGA	192	40	TCAATGATGCTTGGCTCTGGAATGCCAGAACTACAATCTTTTGATGACATTGCATACATTCGAAAGACCCTAGCCTTAGATAAAACTGAGCAAGAGGCTTTGGAGTATTTCATGAAACAAATGAATGATGCACATCATGGTGGCTGGACAACAAAAATGGATTGGATCTTCCACACAATTAAACAGCATGCA
PIK3CA	PIK3CA_45	chr3	178952091	178952266	ACACTGACGACATGGTTCTACAGTGGCTGGACAACAAAAATGGAT	TACGGTAGCAGAGACTTGGTCTTCTAATGCTGTTCATGGATTGTGC	176	40	GTGGCTGGACAACAAAAATGGATTGGATCTTCCACACAATTAAACAGCATGCATTGAACTGAAAAGATAACTGAGAAAATGAAAGCTCACTCTGGATTCCACACTGCACTGTTAATAACTCTCAGCAGGCAAAGACCGATTGCATAGGAATTGCACAATCCATGAACAGCATTAGA
PPM1D	PPM1D_1	chr17	58677703	58677898	ACACTGACGACATGGTTCTACAGAGCGCCTAGTGTGTCTCC	TACGGTAGCAGAGACTTGGTCTcggcgagggcTTTTCTTCAG	196	67	GAGCGCCTAGTGTGTCTCCCGCCGCCGGATTCGGCGGGCTGCGTGGGACCGGCGGGATCCCGGCCAGCCGGCCATGGCGGGGCTGTACTCGCTGGGAGTGAGCGTCTTCTCCGACCAGGGCGGGAGGAAGTACATGGAGGACGTTACTCAAATCGTTGTGGAGCCCGAACCGACGGCTGAAGAAAAgccctcgccg	One primer sits in the repeat region
PPM1D	PPM1D_2	chr17	58677841	58678020	ACACTGACGACATGGTTCTACAGGACGTTACTCAAATCGTTGTGG	TACGGTAGCAGAGACTTGGTCTGCGTCCGGGAGAGGGTC	180	71	GGACGTTACTCAAATCGTTGTGGAGCCCGAACCGACGGCTGAAGAAAAgccctcgccgcggcggtcgctgtctcagccgttgcctccgcggccgtcgccggccgccCTTCCCGGCGGCGAAGTCTCGGGGAAAGGCCCAGCGGTGGCAGCCCGAGAGGCTCGCGACCCTCTCCCGGACGC
PPM1D	PPM1D_3	chr17	58677983	58678179	ACACTGACGACATGGTTCTACAGTGGCAGCCCGAGAGG	TACGGTAGCAGAGACTTGGTCTGGCTCGGACGAGGTGAAA	197	71	GTGGCAGCCCGAGAGGCTCGCGACCCTCTCCCGGACGCCGGGGCCTCGCCGGCACCTAGCCGCTGCTGCCGCCGCCGTTCCTCCGTGGCCTTTTTCGCCGTGTGCGACGGGCACGGCGGGCGGGAGGCGGCACAGTTTGCCCGGGAGCACTTGTGGGGTTTCATCAAGAAGCAGAAGGGTTTCACCTCGTCCGAGCC
PPM1D	PPM1D_4	chr17	58678104	58678301	ACACTGACGACATGGTTCTACAGGGAGGCGGCACAGTTT	TACGGTAGCAGAGACTTGGTCTAAGCCCTGAACTGCCTGAAAAAG	198	58	GGGAGGCGGCACAGTTTGCCCGGGAGCACTTGTGGGGTTTCATCAAGAAGCAGAAGGGTTTCACCTCGTCCGAGCCGGCTAAGGTTTGCGCTGCCATCCGCAAAGGCTTTCTCGCTTGTCACCTTGCCATGTGGAAGAAACTGGGTAAGTTCCCTGGCTTGTTTGGCGCCCGCCCCTTTTTCAGGCAGTTCAGGGCTT
PPM1D	PPM1D_5	chr17	58700811	58701009	ACACTGACGACATGGTTCTACATGCCATTTGTATCCTGACAGTGTATT	TACGGTAGCAGAGACTTGGTCTCTGAATTCCAAGAACCACCCCTG	199	43	TGCCATTTGTATCCTGACAGTGTATTAATGTTTATACTTGCAAGAGTGAAATATTTTATTTCTTATTACAGCGGAATGGCCAAAGACTATGACGGGTCTTCCTAGCACATCAGGGACAACTGCCAGTGTGGTCATCATTCGGGGCATGAAGATGTATGTAGCTCACGTAGGTGACTCAGGGGTGGTTCTTGGAATTCAG
PPM1D	PPM1D_6	chr17	58700947	58701145	ACACTGACGACATGGTTCTACAATTCGGGGCATGAAGATGTATGT	TACGGTAGCAGAGACTTGGTCTACCAAAAGAGGAAAGAGAAAACGAC	199	48	ATTCGGGGCATGAAGATGTATGTAGCTCACGTAGGTGACTCAGGGGTGGTTCTTGGAATTCAGGATGACCCGAAGGATGACTTTGTCAGAGCTGTGGAGGTGACACAGGACCATAAGCCAGAACTTCCCAAGGAAAGAGAACGAATCGAAGGACTTGGTGGGAGGTAACATTCTGTCGTTTTCTCTTTCCTCTTTTGGT
PPM1D	PPM1D_7	chr17	58711049	58711240	ACACTGACGACATGGTTCTACACCTCTCTGAACAGGAATTTTGGC	TACGGTAGCAGAGACTTGGTCTCGATTCACCCCAGACTTGTTCAT	192	28	CCTCTCTGAACAGGAATTTTGGCTTATGCATCTTTGTATTTGAAACACATAAGACATTATTTTGTAATAATGTAGTCTTATTTTATTAGTGATTTAATATACTGAGCTATCTTAGTTGTTGTATTTTAATCATTTAGATTATTTATGTGAACTCTTTATTTTTAGTGTAATGAACAAGTCTGGGGTGAATCG
PPM1D	PPM1D_8	chr17	58711194	58711364	ACACTGACGACATGGTTCTACATGTGAACTCTTTATTTTTAGTGTAATGAACA	TACGGTAGCAGAGACTTGGTCTATTTCACCAAATTAAGTCCTACTTACCA	171	41	TGTGAACTCTTTATTTTTAGTGTAATGAACAAGTCTGGGGTGAATCGTGTAGTTTGGAAACGACCTCGACTCACTCACAATGGACCTGTTAGAAGGAGCACAGTTATTGACCAGATTCCTTTTCTGGCAGTAGCAAGAGCACTTGGTAAGTAGGACTTAATTTGGTGAAAT
PPM1D	PPM1D_9	chr17	58711226	58711410	ACACTGACGACATGGTTCTACAGTCTGGGGTGAATCGTGTAGTTT	TACGGTAGCAGAGACTTGGTCTTCTCCTCTTTTATTTTGCCACCA	185	40	GTCTGGGGTGAATCGTGTAGTTTGGAAACGACCTCGACTCACTCACAATGGACCTGTTAGAAGGAGCACAGTTATTGACCAGATTCCTTTTCTGGCAGTAGCAAGAGCACTTGGTAAGTAGGACTTAATTTGGTGAAATTATATTGAATTTTCTACAATATATGGTGGCAAAATAAAAGAGGAGA
PPM1D	PPM1D_10	chr17	58725190	58725377	ACACTGACGACATGGTTCTACATGTTGCTGTTGTACTATTAGCTTCC	TACGGTAGCAGAGACTTGGTCTCCAAAGTCCATCACTCCCCAATA	188	44	tgttgctgttgtACTATTAGCTTCCAACTAATACTTCTTGCTTTTTCTGCTCCCTTCCCCCAGGTGATTTGTGGAGCTATGATTTCTTCAGTGGTGAATTTGTGGTGTCACCTGAACCAGACACAAGTGTCCACACTCTTGACCCTCAGAAGCACAAGTATATTATATTGGGGAGTGATGGACTTTGG	One primer sits in the repeat region
PPM1D	PPM1D_11	chr17	58725249	58725423	ACACTGACGACATGGTTCTACACCAGGTGATTTGTGGAGCTATGA	TACGGTAGCAGAGACTTGGTCTCTTGGTCCTGGCACATTGAGAT	175	45	CCAGGTGATTTGTGGAGCTATGATTTCTTCAGTGGTGAATTTGTGGTGTCACCTGAACCAGACACAAGTGTCCACACTCTTGACCCTCAGAAGCACAAGTATATTATATTGGGGAGTGATGGACTTTGGAATATGATTCCACCACAAGATGCCATCTCAATGTGCCAGGACCAAG
PPM1D	PPM1D_12	chr17	58725346	58725535	ACACTGACGACATGGTTCTACAAGTATATTATATTGGGGAGTGATGGAC	TACGGTAGCAGAGACTTGGTCTAGGTCAATGTCCTTAGTTCATATTCAAG	190	37	AGTATATTATATTGGGGAGTGATGGACTTTGGAATATGATTCCACCACAAGATGCCATCTCAATGTGCCAGGACCAAGAGGAGAAAAAATACCTGATGGTGAGATGTGATTGAATAACTTGATATTGTTGTCTAAACATTGTTTTGGTACTTCTGTCAGAATCTTGAATATGAACTAAGGACATTGACCT
PPM1D	PPM1D_13	chr17	58733912	58734085	ACACTGACGACATGGTTCTACAGCAGCTAAATCTGAGTTACTTTCCT	TACGGTAGCAGAGACTTGGTCTATTGTCCACTTCTGGAGAGATGC	174	47	GCAGCTAAATCTGAGTTACTTTCCTTCTCCTTGTTCTTTTGAATACAGGGTGAGCATGGACAATCTTGTGCCAAAATGCTTGTGAATCGAGCATTGGGCCGCTGGAGGCAGCGTATGCTCCGAGCAGATAACACTAGTGCCATAGTAATCTGCATCTCTCCAGAAGTGGACAAT
PPM1D	PPM1D_14	chr17	58733987	58734175	ACACTGACGACATGGTTCTACAATGCTTGTGAATCGAGCATTGG	TACGGTAGCAGAGACTTGGTCTAGGAGTCATCACACAGGTTTCTT	189	47	ATGCTTGTGAATCGAGCATTGGGCCGCTGGAGGCAGCGTATGCTCCGAGCAGATAACACTAGTGCCATAGTAATCTGCATCTCTCCAGAAGTGGACAATCAGGGAAACTTTACCAATGAAGATGAGTTATACCTGAACCTGACTGACAGCCCTTCCTATAATAGTCAAGAAACCTGTGTGATGACTCCT
PPM1D	PPM1D_15	chr17	58734067	58734264	ACACTGACGACATGGTTCTACACTCTCCAGAAGTGGACAATCAGG	TACGGTAGCAGAGACTTGGTCTTGACGCTAACCAAAGAACTGGTG	198	40	CTCTCCAGAAGTGGACAATCAGGGAAACTTTACCAATGAAGATGAGTTATACCTGAACCTGACTGACAGCCCTTCCTATAATAGTCAAGAAACCTGTGTGATGACTCCTTCCCCATGTTCTACACCACCAGTCAAGGTATATAGTTCCATAGTTTTTAAGTTATGTTTTAATAGACACCAGTTCTTTGGTTAGCGTCA
PPM1D	PPM1D_16	chr17	58740292	58740483	ACACTGACGACATGGTTCTACATGCATAGATTTGTTGAGTTCTGGG	TACGGTAGCAGAGACTTGGTCTCCTTGGACATTCTCTCGAGCTAT	192	41	TGCATAGATTTGTTGAGTTCTGGGATAAATTTTTTCTTATTTGTTTTACCTTCTTATTTTTCAGTCACTGGAGGAGGATCCATGGCCAAGGGTGAATTCTAAGGACCATATACCTGCCCTGGTTCGTAGCAATGCCTTCTCAGAGAATTTTTTAGAGGTTTCAGCTGAGATAGCTCGAGAGAATGTCCAAGG
PPM1D	PPM1D_17	chr17	58740347	58740539	ACACTGACGACATGGTTCTACAATTTTTCAGTCACTGGAGGAGGA	TACGGTAGCAGAGACTTGGTCTGGGCTTTAGCGCAATTTTCTTCA	193	45	ATTTTTCAGTCACTGGAGGAGGATCCATGGCCAAGGGTGAATTCTAAGGACCATATACCTGCCCTGGTTCGTAGCAATGCCTTCTCAGAGAATTTTTTAGAGGTTTCAGCTGAGATAGCTCGAGAGAATGTCCAAGGTGTAGTCATACCCTCAAAAGATCCAGAACCACTTGAAGAAAATTGCGCTAAAGCCC
PPM1D	PPM1D_18	chr17	58740477	58740674	ACACTGACGACATGGTTCTACATCCAAGGTGTAGTCATACCCTCA	TACGGTAGCAGAGACTTGGTCTCAATTTCTTGGGCTTTCATTTGGC	198	39	TCCAAGGTGTAGTCATACCCTCAAAAGATCCAGAACCACTTGAAGAAAATTGCGCTAAAGCCCTGACTTTAAGGATACATGATTCTTTGAATAATAGCCTTCCAATTGGCCTTGTGCCTACTAATTCAACAAACACTGTCATGGACCAAAAAAATTTGAAGATGTCAACTCCTGGCCAAATGAAAGCCCAAGAAATTG
PPM1D	PPM1D_19	chr17	58740582	58740758	ACACTGACGACATGGTTCTACATTGGCCTTGTGCCTACTAATTCA	TACGGTAGCAGAGACTTGGTCTAGCCATTTCGTCTATGCTTCTTCA	177	41	TTGGCCTTGTGCCTACTAATTCAACAAACACTGTCATGGACCAAAAAAATTTGAAGATGTCAACTCCTGGCCAAATGAAAGCCCAAGAAATTGAAAGAACCCCTCCAACAAACTTTAAAAGGACATTAGAAGAGTCCAATTCTGGCCCCCTGATGAAGAAGCATAGACGAAATGGCT
PPM1D	PPM1D_20	chr17	58740673	58740869	ACACTGACGACATGGTTCTACATGAAAGAACCCCTCCAACAAACT	TACGGTAGCAGAGACTTGGTCTTTCCAATTTTCTTCTGGCCCCTA	197	47	TGAAAGAACCCCTCCAACAAACTTTAAAAGGACATTAGAAGAGTCCAATTCTGGCCCCCTGATGAAGAAGCATAGACGAAATGGCTTAAGTCGAAGTAGTGGTGCTCAGCCTGCAAGTCTCCCCACAACCTCACAGCGAAAGAACTCTGTTAAACTCACCATGCGACGCAGACTTAGGGGCCAGAAGAAAATTGGAA
PPM1D	PPM1D_21	chr17	58740756	58740940	ACACTGACGACATGGTTCTACAGCTTAAGTCGAAGTAGTGGTGCT	TACGGTAGCAGAGACTTGGTCTGGAAAAACCTCATTTCCCAGATGC	185	45	GCTTAAGTCGAAGTAGTGGTGCTCAGCCTGCAAGTCTCCCCACAACCTCACAGCGAAAGAACTCTGTTAAACTCACCATGCGACGCAGACTTAGGGGCCAGAAGAAAATTGGAAATCCTTTACTTCATCAACACAGGAAAACTGTTTGTGTTTGCTGAAATGCATCTGGGAAATGAGGTTTTTCC
PTEN	PTEN_1	chr10	89624142	89624334	ACACTGACGACATGGTTCTACACATTTCCATCCTGCAGAAGAAGC	TACGGTAGCAGAGACTTGGTCTTAAAGAGGAGCAGCCGCAGAAAT	193	49	CATTTCCATCCTGCAGAAGAAGCCCCGCCACCAGCAGCTTCTGCCATCTCTCTCCTCCTTTTTCTTCAGCCACAGGCTCCCAGACATGACAGCCATCATCAAAGAGATCGTTAGCAGAAACAAAAGGAGATATCAAGAGGATGGATTCGACTTAGACTTGACCTGTATCCATTTCTGCGGCTGCTCCTCTTTA
PTEN	PTEN_2	chr10	89653738	89653927	ACACTGACGACATGGTTCTACATGCTGCATATTTCAGATATTTCTTTCCTTA	TACGGTAGCAGAGACTTGGTCTATGAAAACACAACATGAATATAAACATCAAT	190	30	TGCTGCATATTTCAGATATTTCTTTCCTTAACTAAAGTACTCAGATATTTATCCAAACATTATTGCTATGGGATTTCCTGCAGAAAGACTTGAAGGCGTATACAGGAACAATATTGATGATGTAGTAAGGTAAGAATGCTTTGATTTTCTATTTCAAATATTGATGTTTATATTCATGTTGTGTTTTCAT
PTEN	PTEN_3	chr10	89685172	89685367	ACACTGACGACATGGTTCTACAAATCTGTCTTTTGGTTTTTCTTGATAGT	TACGGTAGCAGAGACTTGGTCTAATAGTTGTTTTAGAAGATATTTGCAAGC	196	26	AATCTGTCTTTTGGTTTTTCTTGATAGTATTAATGTAATTTCAAATGTTAGCTCATTTTTGTTAATGGTGGCTTTTTGTTTGTTTGTTTTGTTTTAAGGTTTTTGGATTCAAAGCATAAAAACCATTACAAGATATACAATCTGTAAGTATGTTTTCTTATTTGTATGCTTGCAAATATCTTCTAAAACAACTATT
PTEN	PTEN_4	chr10	89690711	89690908	ACACTGACGACATGGTTCTACAAAAGATTCAGGCAATGTTTGTTAGTAT	TACGGTAGCAGAGACTTGGTCTACAGTAAGATACAGTCTATCGGGTT	198	31	aaagattcaggcaatgtttgttagtattAGTACTTTTTTTTCTTCCTAAGTGCAAAAGATAACTTTATATCACTTTTAAACTTTTCTTTTAGTTGTGCTGAAAGACATTATGACACCGCCAAATTTAATTGCAGAGGTAGGTATGAATGTACTGTACTATGTTGTATAACTTAAACCCGATAGACTGTATCTTACTGT	One primer sits in the repeat region
PTEN	PTEN_5	chr10	89692686	89692875	ACACTGACGACATGGTTCTACATGCAACATTTCTAAAGTTACCTACTTGT	TACGGTAGCAGAGACTTGGTCTGCAACATGATTGTCATCTTCACT	190	34	TGCAACATTTCTAAAGTTACCTACTTGTTAATTAAAAATTCAAGAGTTTTTTTTTCTTATTCTGAGGTTATCTTTTTACCACAGTTGCACAATATCCTTTTGAAGACCATAACCCACCACAGCTAGAACTTATCAAACCCTTTTGTGAAGATCTTGACCAATGGCTAAGTGAAGATGACAATCATGTTGC
PTEN	PTEN_6	chr10	89692763	89692960	ACACTGACGACATGGTTCTACAACCACAGTTGCACAATATCCTTT	TACGGTAGCAGAGACTTGGTCTTGCCTTTAAAAATTTGCCCCGAT	198	39	ACCACAGTTGCACAATATCCTTTTGAAGACCATAACCCACCACAGCTAGAACTTATCAAACCCTTTTGTGAAGATCTTGACCAATGGCTAAGTGAAGATGACAATCATGTTGCAGCAATTCACTGTAAAGCTGGAAAGGGACGAACTGGTGTAATGATATGTGCATATTTATTACATCGGGGCAAATTTTTAAAGGCA
PTEN	PTEN_7	chr10	89692863	89693054	ACACTGACGACATGGTTCTACAACAATCATGTTGCAGCAATTCAC	TACGGTAGCAGAGACTTGGTCTCTCAGATCCAGGAAGAGGAAAGG	192	39	ACAATCATGTTGCAGCAATTCACTGTAAAGCTGGAAAGGGACGAACTGGTGTAATGATATGTGCATATTTATTACATCGGGGCAAATTTTTAAAGGCACAAGAGGCCCTAGATTTCTATGGGGAAGTAAGGACCAGAGACAAAAAGGTAAGTTATTTTTTGATGTTTTTCCTTTCCTCTTCCTGGATCTGAG	Assays designed by relax mode and have no off-target hits
PTEN	PTEN_8	chr10	89711781	89711951	ACACTGACGACATGGTTCTACAATGGCTACGACCCAGTTACCATA	TACGGTAGCAGAGACTTGGTCTGGTCTATAATCCAGATGATTCTTTAACAGGT	171	36	ATGGCTACGACCCAGTTACCATAGCAATTTAGTGAAATAACTATAATGGAACATTTTTTTTCAATTTGGCTTCTCTTTTTTTTCTGTCCACCAGGGAGTAACTATTCCCAGTCAGAGGCGCTATGTGTATTATTATAGCTACCTGTTAAAGAATCATCTGGATTATAGACC
PTEN	PTEN_9	chr10	89711863	89712044	ACACTGACGACATGGTTCTACATCTGTCCACCAGGGAGTAACTAT	TACGGTAGCAGAGACTTGGTCTTGGAAGGATGAGAATTTCAAGCACT	182	41	TCTGTCCACCAGGGAGTAACTATTCCCAGTCAGAGGCGCTATGTGTATTATTATAGCTACCTGTTAAAGAATCATCTGGATTATAGACCAGTGGCACTGTTGTTTCACAAGATGATGTTTGAAACTATTCCAATGTTCAGTGGCGGAACTTGCAGTAAGTGCTTGAAATTCTCATCCTTCCA
PTEN	PTEN_10	chr10	89717547	89717726	ACACTGACGACATGGTTCTACATGACAGTTTGACAGTTAAAGGCAT	TACGGTAGCAGAGACTTGGTCTCACACACAGGTAACGGCTGA	180	43	TGACAGTTTGACAGTTAAAGGCATTTCCTGTGAAATAATACTGGTATGTATTTAACCATGCAGATCCTCAGTTTGTGGTCTGCCAGCTAAAGGTGAAGATATATTCCTCCAATTCAGGACCCACACGACGGGAAGACAAGTTCATGTACTTTGAGTTCCCTCAGCCGTTACCTGTGTGTG
PTEN	PTEN_11	chr10	89717625	89717814	ACACTGACGACATGGTTCTACATCTGCCAGCTAAAGGTGAAGATA	TACGGTAGCAGAGACTTGGTCTATTTTGGATATTTCTCCCAATGAAAGT	190	41	TCTGCCAGCTAAAGGTGAAGATATATTCCTCCAATTCAGGACCCACACGACGGGAAGACAAGTTCATGTACTTTGAGTTCCCTCAGCCGTTACCTGTGTGTGGTGATATCAAAGTAGAGTTCTTCCACAAACAGAACAAGATGCTAAAAAAGGTTTGTACTTTACTTTCATTGGGAGAAATATCCAAAAT
PTEN	PTEN_12	chr10	89720604	89720780	ACACTGACGACATGGTTCTACAAAATATGTCATTTCATTTCTTTTTCTTTTCTTTT	TACGGTAGCAGAGACTTGGTCTTATCTGCACGCTCTATACTGCAA	177	31	aaatatGTCATTTCAtttctttttcttttctttttttttttttttAGGACAAAATGTTTCACTTTTGGGTAAATACATTCTTCATACCAGGACCAGAGGAAACCTCAGAAAAAGTAGAAAATGGAAGTCTATGTGATCAAGAAATCGATAGCATTTGCAGTATAGAGCGTGCAGATA	One primer sits in the repeat region
PTEN	PTEN_13	chr10	89720693	89720881	ACACTGACGACATGGTTCTACAGGACCAGAGGAAACCTCAGAAAA	TACGGTAGCAGAGACTTGGTCTACTGACCTTAAAATTTGGAGAAAAGTAT	189	35	GGACCAGAGGAAACCTCAGAAAAAGTAGAAAATGGAAGTCTATGTGATCAAGAAATCGATAGCATTTGCAGTATAGAGCGTGCAGATAATGACAAGGAATATCTAGTACTTACTTTAACAAAAAATGATCTTGACAAAGCAAATAAAGACAAAGCCAACCGATACTTTTCTCCAAATTTTAAGGTCAGT
PTEN	PTEN_14	chr10	89720740	89720932	ACACTGACGACATGGTTCTACATCAAGAAATCGATAGCATTTGCAGT	TACGGTAGCAGAGACTTGGTCTACACACATCACATACATACAAGTCA	193	33	TCAAGAAATCGATAGCATTTGCAGTATAGAGCGTGCAGATAATGACAAGGAATATCTAGTACTTACTTTAACAAAAAATGATCTTGACAAAGCAAATAAAGACAAAGCCAACCGATACTTTTCTCCAAATTTTAAGGTCAGTTAAATTAAACATTTTGTGGGGGTTGTTGACTTGTATGTATGTGATGTGTGT
[truncated: 188 more rows]

## Sheet: Table S2
Table S2. Callable bases and depth summary derived from 5,112 sorted, aligned and recalibrated BAM files
[truncated: 32 more rows]

[truncated: 4 more sheets: Table S3, Table S4, Table S5, Table S6]
